# Supplementary material
Source: publisher figshare collection journal article supplement (https://gsajournals.figshare.com/ndownloader/files/14964713)
Supplement: Supplementary file 1 [file 14964713]

## Sheet: Validated_intergenic_PACs
chromosome	cluster_start	cluster_end	strand	pac	region	geneID	geneStartEnds	transcripts
10	687842	687842	-	687842	intergenic	MSTRG.11882	655907-699450	MSTRG.11882.1(655907:699336);MSTRG.11882.2(689299:699450);MSTRG.11882.3(695320:696788)
10	703587	703587	-	703587	intergenic	MSTRG.11885	703552-706061	MSTRG.11885.1(703552:706061);MSTRG.11885.2(703558:706061)
10	703626	703698	-	703652	intergenic	MSTRG.11885	703552-706061	MSTRG.11885.1(703552:706061);MSTRG.11885.2(703558:706061)
10	703746	703746	-	703746	intergenic	MSTRG.11885	703552-706061	MSTRG.11885.1(703552:706061);MSTRG.11885.2(703558:706061)
10	703837	703861	-	703837	intergenic	MSTRG.11885	703552-706061	MSTRG.11885.1(703552:706061);MSTRG.11885.2(703558:706061)
10	1693617	1693623	-	1693617	intergenic	MSTRG.11957	1693560-1694600	MSTRG.11957.1(1693560:1694600);MSTRG.11957.2(1693561:1694600)
10	1693661	1693670	-	1693666	intergenic	MSTRG.11957	1693560-1694600	MSTRG.11957.1(1693560:1694600);MSTRG.11957.2(1693561:1694600)
10	1693713	1693748	-	1693743	intergenic	MSTRG.11957	1693560-1694600	MSTRG.11957.1(1693560:1694600);MSTRG.11957.2(1693561:1694600)
10	1982255	1982255	-	1982255	intergenic	MSTRG.11970	1982185-1982536	MSTRG.11970.1(1982185:1982536)
10	2014836	2014926	-	2014868	intergenic	MSTRG.11972	2014157-2018593	MSTRG.11972.1(2014157:2018593);MSTRG.11972.2(2014369:2018593);MSTRG.11972.3(2014456:2018593);MSTRG.11972.4(2014648:2018593);MSTRG.11972.5(2014648:2018579);MSTRG.11972.6(2014648:2018568);MSTRG.11972.7(2014668:2018524);MSTRG.11972.8(2014790:2018563)
10	2014968	2015027	-	2014997	intergenic	MSTRG.11972	2014157-2018593	MSTRG.11972.1(2014157:2018593);MSTRG.11972.2(2014369:2018593);MSTRG.11972.3(2014456:2018593);MSTRG.11972.4(2014648:2018593);MSTRG.11972.5(2014648:2018579);MSTRG.11972.6(2014648:2018568);MSTRG.11972.7(2014668:2018524);MSTRG.11972.8(2014790:2018563)
10	2015062	2015067	-	2015067	intergenic	MSTRG.11972	2014157-2018593	MSTRG.11972.1(2014157:2018593);MSTRG.11972.2(2014369:2018593);MSTRG.11972.3(2014456:2018593);MSTRG.11972.4(2014648:2018593);MSTRG.11972.5(2014648:2018579);MSTRG.11972.6(2014648:2018568);MSTRG.11972.7(2014668:2018524);MSTRG.11972.8(2014790:2018563)
10	2015141	2015142	-	2015141	intergenic	MSTRG.11972	2014157-2018593	MSTRG.11972.1(2014157:2018593);MSTRG.11972.2(2014369:2018593);MSTRG.11972.3(2014456:2018593);MSTRG.11972.4(2014648:2018593);MSTRG.11972.5(2014648:2018579);MSTRG.11972.6(2014648:2018568);MSTRG.11972.7(2014668:2018524);MSTRG.11972.8(2014790:2018563)
10	2015448	2015449	-	2015448	intergenic	MSTRG.11972	2014157-2018593	MSTRG.11972.1(2014157:2018593);MSTRG.11972.2(2014369:2018593);MSTRG.11972.3(2014456:2018593);MSTRG.11972.4(2014648:2018593);MSTRG.11972.5(2014648:2018579);MSTRG.11972.6(2014648:2018568);MSTRG.11972.7(2014668:2018524);MSTRG.11972.8(2014790:2018563)
10	2015479	2015479	-	2015479	intergenic	MSTRG.11972	2014157-2018593	MSTRG.11972.1(2014157:2018593);MSTRG.11972.2(2014369:2018593);MSTRG.11972.3(2014456:2018593);MSTRG.11972.4(2014648:2018593);MSTRG.11972.5(2014648:2018579);MSTRG.11972.6(2014648:2018568);MSTRG.11972.7(2014668:2018524);MSTRG.11972.8(2014790:2018563)
10	2015581	2015581	-	2015581	intergenic	MSTRG.11972	2014157-2018593	MSTRG.11972.1(2014157:2018593);MSTRG.11972.2(2014369:2018593);MSTRG.11972.3(2014456:2018593);MSTRG.11972.4(2014648:2018593);MSTRG.11972.5(2014648:2018579);MSTRG.11972.6(2014648:2018568);MSTRG.11972.7(2014668:2018524);MSTRG.11972.8(2014790:2018563)
10	2016285	2016285	-	2016285	intergenic	MSTRG.11972	2014157-2018593	MSTRG.11972.1(2014157:2018593);MSTRG.11972.2(2014369:2018593);MSTRG.11972.3(2014456:2018593);MSTRG.11972.4(2014648:2018593);MSTRG.11972.5(2014648:2018579);MSTRG.11972.6(2014648:2018568);MSTRG.11972.7(2014668:2018524);MSTRG.11972.8(2014790:2018563)
10	2016335	2016335	-	2016335	intergenic	MSTRG.11972	2014157-2018593	MSTRG.11972.1(2014157:2018593);MSTRG.11972.2(2014369:2018593);MSTRG.11972.3(2014456:2018593);MSTRG.11972.4(2014648:2018593);MSTRG.11972.5(2014648:2018579);MSTRG.11972.6(2014648:2018568);MSTRG.11972.7(2014668:2018524);MSTRG.11972.8(2014790:2018563)
10	2563526	2563540	-	2563540	intergenic	MSTRG.12015	2563334-2565028	MSTRG.12015.1(2563334:2565028);MSTRG.12015.2(2563371:2564995)
10	2563565	2563578	-	2563565	intergenic	MSTRG.12015	2563334-2565028	MSTRG.12015.1(2563334:2565028);MSTRG.12015.2(2563371:2564995)
10	2748516	2748516	-	2748516	intergenic	MSTRG.12024	2742600-2754229	MSTRG.12024.1(2742600:2751213);MSTRG.12024.2(2742875:2754229);MSTRG.12024.3(2751910:2754085)
10	3603104	3603106	-	3603106	intergenic	MSTRG.12068	3603044-3606263	MSTRG.12068.1(3603044:3606263)
10	3605133	3605133	-	3605133	intergenic	MSTRG.12068	3603044-3606263	MSTRG.12068.1(3603044:3606263)
10	3605970	3605970	-	3605970	intergenic	MSTRG.12068	3603044-3606263	MSTRG.12068.1(3603044:3606263)
10	3630616	3630616	-	3630616	intergenic	MSTRG.12074	3630510-3633753	MSTRG.12074.1(3630510:3633753)
10	3630819	3630821	-	3630819	intergenic	MSTRG.12074	3630510-3633753	MSTRG.12074.1(3630510:3633753)
10	3630858	3630858	-	3630858	intergenic	MSTRG.12074	3630510-3633753	MSTRG.12074.1(3630510:3633753)
10	3630956	3630956	-	3630956	intergenic	MSTRG.12074	3630510-3633753	MSTRG.12074.1(3630510:3633753)
10	3631002	3631025	-	3631002	intergenic	MSTRG.12074	3630510-3633753	MSTRG.12074.1(3630510:3633753)
10	3631062	3631062	-	3631062	intergenic	MSTRG.12074	3630510-3633753	MSTRG.12074.1(3630510:3633753)
10	3632107	3632107	-	3632107	intergenic	MSTRG.12074	3630510-3633753	MSTRG.12074.1(3630510:3633753)
10	3632154	3632154	-	3632154	intergenic	MSTRG.12074	3630510-3633753	MSTRG.12074.1(3630510:3633753)
10	3632218	3632218	-	3632218	intergenic	MSTRG.12074	3630510-3633753	MSTRG.12074.1(3630510:3633753)
10	3632662	3632662	-	3632662	intergenic	MSTRG.12074	3630510-3633753	MSTRG.12074.1(3630510:3633753)
10	3632967	3632985	-	3632967	intergenic	MSTRG.12074	3630510-3633753	MSTRG.12074.1(3630510:3633753)
10	3651825	3651837	-	3651835	intergenic	MSTRG.12076	3650790-3652424	MSTRG.12076.1(3650790:3652424)
10	4183331	4183340	-	4183340	intergenic	MSTRG.12127	4183338-4183577	MSTRG.12127.1(4183338:4183577)
10	4183429	4183455	-	4183434	intergenic	MSTRG.12127	4183338-4183577	MSTRG.12127.1(4183338:4183577)
10	4343896	4343896	-	4343896	intergenic	MSTRG.12148	4335098-4393375	MSTRG.12148.1(4335098:4351936);Zm00001d023384_T001(4335098:4336256);MSTRG.12148.3(4335142:4393375)
10	5102957	5102957	-	5102957	intergenic	MSTRG.12196	5102904-5106151	MSTRG.12196.1(5102904:5105905);MSTRG.12196.2(5102905:5106151);MSTRG.12196.3(5102909:5105905);MSTRG.12196.4(5102933:5105905);Zm00001d023422_T001(5103755:5105905)
10	5103002	5103024	-	5103002	intergenic	MSTRG.12196	5102904-5106151	MSTRG.12196.1(5102904:5105905);MSTRG.12196.2(5102905:5106151);MSTRG.12196.3(5102909:5105905);MSTRG.12196.4(5102933:5105905);Zm00001d023422_T001(5103755:5105905)
10	5103127	5103231	-	5103139	intergenic	MSTRG.12196	5102904-5106151	MSTRG.12196.1(5102904:5105905);MSTRG.12196.2(5102905:5106151);MSTRG.12196.3(5102909:5105905);MSTRG.12196.4(5102933:5105905);Zm00001d023422_T001(5103755:5105905)
10	5749752	5749752	-	5749752	intergenic	MSTRG.12234	5748470-5749858	MSTRG.12234.1(5748470:5749858)
10	5754910	5754910	-	5754910	intergenic	MSTRG.12236	5753455-5756559	MSTRG.12236.1(5753455:5756416);MSTRG.12236.2(5753455:5756392);MSTRG.12236.3(5753455:5755156);MSTRG.12236.4(5753455:5756559);Zm00001d023447_T001(5753455:5754612)
10	6098478	6098478	-	6098478	intergenic	MSTRG.12246	6082140-6100026	MSTRG.12246.1(6082140:6100026);MSTRG.12246.2(6098477:6099917);MSTRG.12246.3(6098481:6099862);MSTRG.12246.4(6098488:6099862);Zm00001d023456_T001(6099071:6099862)
10	6298044	6298044	-	6298044	intergenic	MSTRG.12254	6289500-6299676	MSTRG.12254.1(6289500:6299676);Zm00001d023461_T001(6299146:6299676)
10	10166831	10166831	-	10166831	intergenic	MSTRG.12390	10164850-10167414	MSTRG.12390.1(10164850:10167414);MSTRG.12390.2(10165237:10167389);Zm00001d023558_T001(10165237:10166640)
10	10309324	10309324	-	10309324	intergenic	MSTRG.12399	10306593-10309372	MSTRG.12399.1(10306593:10309372)
10	10313049	10313141	-	10313084	intergenic	MSTRG.12400	10313050-10314939	MSTRG.12400.1(10313050:10314782);MSTRG.12400.2(10313050:10314939);MSTRG.12400.3(10313065:10314782);Zm00001d023565_T001(10313565:10314782)
10	10634782	10634782	-	10634782	intergenic	MSTRG.12417	10596646-10636069	MSTRG.12417.1(10596646:10636069);MSTRG.12417.2(10634797:10636069);MSTRG.12417.3(10634820:10636069);MSTRG.12417.4(10635094:10636069);MSTRG.12417.5(10635094:10636069);Zm00001d023577_T001(10635893:10636069)
10	11356721	11356721	-	11356721	intergenic	MSTRG.12448	11236321-11358687	Zm00001d023593_T001(11236321:11238707);MSTRG.12448.2(11236463:11358519);MSTRG.12448.3(11236478:11238625);MSTRG.12448.4(11236482:11238638);Zm00001d023593_T002(11236501:11238707);MSTRG.12448.6(11356685:11358475);Zm00001d023596_T001(11356944:11358687)
10	11856613	11856613	-	11856613	intergenic	MSTRG.12457	11856568-11857943	MSTRG.12457.1(11856568:11857943)
10	11856701	11856713	-	11856701	intergenic	MSTRG.12457	11856568-11857943	MSTRG.12457.1(11856568:11857943)
10	12896177	12896319	-	12896271	intergenic	MSTRG.12484	12896161-12906692	MSTRG.12484.1(12896161:12906692);Zm00001d023634_T001(12898296:12906692)
10	12896370	12896370	-	12896370	intergenic	MSTRG.12484	12896161-12906692	MSTRG.12484.1(12896161:12906692);Zm00001d023634_T001(12898296:12906692)
10	13069196	13069196	-	13069196	intergenic	MSTRG.12490	13069152-13075806	MSTRG.12490.1(13069152:13075806);MSTRG.12490.2(13069152:13075670);Zm00001d023635_T001(13070016:13075806)
10	13069224	13069247	-	13069226	intergenic	MSTRG.12490	13069152-13075806	MSTRG.12490.1(13069152:13075806);MSTRG.12490.2(13069152:13075670);Zm00001d023635_T001(13070016:13075806)
10	13069285	13069285	-	13069285	intergenic	MSTRG.12490	13069152-13075806	MSTRG.12490.1(13069152:13075806);MSTRG.12490.2(13069152:13075670);Zm00001d023635_T001(13070016:13075806)
10	14595587	14595587	-	14595587	intergenic	MSTRG.12533	14595421-14595909	MSTRG.12533.1(14595421:14595909)
10	14652152	14652152	-	14652152	intergenic	MSTRG.12535	14633547-14658990	MSTRG.12535.1(14633547:14658961);MSTRG.12535.2(14652160:14658961);Zm00001d023671_T001(14657916:14658990)
10	14652732	14652756	-	14652756	intergenic	MSTRG.12535	14633547-14658990	MSTRG.12535.1(14633547:14658961);MSTRG.12535.2(14652160:14658961);Zm00001d023671_T001(14657916:14658990)
10	14652820	14652820	-	14652820	intergenic	MSTRG.12535	14633547-14658990	MSTRG.12535.1(14633547:14658961);MSTRG.12535.2(14652160:14658961);Zm00001d023671_T001(14657916:14658990)
10	14652881	14652881	-	14652881	intergenic	MSTRG.12535	14633547-14658990	MSTRG.12535.1(14633547:14658961);MSTRG.12535.2(14652160:14658961);Zm00001d023671_T001(14657916:14658990)
10	14652927	14652996	-	14652996	intergenic	MSTRG.12535	14633547-14658990	MSTRG.12535.1(14633547:14658961);MSTRG.12535.2(14652160:14658961);Zm00001d023671_T001(14657916:14658990)
10	14653028	14653029	-	14653028	intergenic	MSTRG.12535	14633547-14658990	MSTRG.12535.1(14633547:14658961);MSTRG.12535.2(14652160:14658961);Zm00001d023671_T001(14657916:14658990)
10	14653079	14653143	-	14653126	intergenic	MSTRG.12535	14633547-14658990	MSTRG.12535.1(14633547:14658961);MSTRG.12535.2(14652160:14658961);Zm00001d023671_T001(14657916:14658990)
10	14653192	14653192	-	14653192	intergenic	MSTRG.12535	14633547-14658990	MSTRG.12535.1(14633547:14658961);MSTRG.12535.2(14652160:14658961);Zm00001d023671_T001(14657916:14658990)
10	14653236	14653250	-	14653244	intergenic	MSTRG.12535	14633547-14658990	MSTRG.12535.1(14633547:14658961);MSTRG.12535.2(14652160:14658961);Zm00001d023671_T001(14657916:14658990)
10	14653281	14653287	-	14653286	intergenic	MSTRG.12535	14633547-14658990	MSTRG.12535.1(14633547:14658961);MSTRG.12535.2(14652160:14658961);Zm00001d023671_T001(14657916:14658990)
10	14653328	14653328	-	14653328	intergenic	MSTRG.12535	14633547-14658990	MSTRG.12535.1(14633547:14658961);MSTRG.12535.2(14652160:14658961);Zm00001d023671_T001(14657916:14658990)
10	14653370	14653421	-	14653389	intergenic	MSTRG.12535	14633547-14658990	MSTRG.12535.1(14633547:14658961);MSTRG.12535.2(14652160:14658961);Zm00001d023671_T001(14657916:14658990)
10	14653472	14653472	-	14653472	intergenic	MSTRG.12535	14633547-14658990	MSTRG.12535.1(14633547:14658961);MSTRG.12535.2(14652160:14658961);Zm00001d023671_T001(14657916:14658990)
10	18036173	18036173	-	18036173	intergenic	MSTRG.12619	18031582-18036762	MSTRG.12619.1(18031582:18036762)
10	18082454	18082454	-	18082454	intergenic	MSTRG.12621	18081302-18083254	MSTRG.12621.1(18081302:18083254);MSTRG.12621.2(18081306:18082920)
10	18082552	18082552	-	18082552	intergenic	MSTRG.12621	18081302-18083254	MSTRG.12621.1(18081302:18083254);MSTRG.12621.2(18081306:18082920)
10	18682943	18682990	-	18682987	intergenic	MSTRG.12636	18682892-18684253	MSTRG.12636.1(18682892:18684253)
10	23122288	23122288	-	23122288	intergenic	MSTRG.12731	23122059-23122410	MSTRG.12731.1(23122059:23122410)
10	28214246	28214246	-	28214246	intergenic	MSTRG.12856	28213131-28215543	MSTRG.12856.1(28213131:28215543)
10	30976055	30976055	-	30976055	intergenic	MSTRG.12895	30973587-30976138	MSTRG.12895.1(30973587:30976138)
10	35439407	35439407	-	35439407	intergenic	MSTRG.12968	35439398-35441347	MSTRG.12968.1(35439398:35441255);MSTRG.12968.2(35439464:35441347);MSTRG.12968.3(35439523:35441200)
10	35439498	35439508	-	35439498	intergenic	MSTRG.12968	35439398-35441347	MSTRG.12968.1(35439398:35441255);MSTRG.12968.2(35439464:35441347);MSTRG.12968.3(35439523:35441200)
10	35440105	35440105	-	35440105	intergenic	MSTRG.12968	35439398-35441347	MSTRG.12968.1(35439398:35441255);MSTRG.12968.2(35439464:35441347);MSTRG.12968.3(35439523:35441200)
10	41456523	41456523	-	41456523	intergenic	MSTRG.13058	41456460-41458519	MSTRG.13058.1(41456460:41458476);MSTRG.13058.2(41456633:41458519);Zm00001d024071_T001(41457090:41458519)
10	45051089	45051089	-	45051089	intergenic	MSTRG.13095	45051042-45053421	MSTRG.13095.1(45051042:45053151);MSTRG.13095.2(45051073:45053151);MSTRG.13095.3(45051073:45053421);MSTRG.13095.4(45051088:45053303);MSTRG.13095.5(45051114:45053046);Zm00001d024102_T001(45051775:45053046);Zm00001d024102_T002(45051775:45053151)
10	45051135	45051135	-	45051135	intergenic	MSTRG.13095	45051042-45053421	MSTRG.13095.1(45051042:45053151);MSTRG.13095.2(45051073:45053151);MSTRG.13095.3(45051073:45053421);MSTRG.13095.4(45051088:45053303);MSTRG.13095.5(45051114:45053046);Zm00001d024102_T001(45051775:45053046);Zm00001d024102_T002(45051775:45053151)
10	48883275	48883275	-	48883275	intergenic	MSTRG.13148	48880672-48884369	MSTRG.13148.1(48880672:48884189);MSTRG.13148.2(48880673:48884369);MSTRG.13148.3(48883726:48884256)
10	48883314	48883314	-	48883314	intergenic	MSTRG.13148	48880672-48884369	MSTRG.13148.1(48880672:48884189);MSTRG.13148.2(48880673:48884369);MSTRG.13148.3(48883726:48884256)
10	48883447	48883447	-	48883447	intergenic	MSTRG.13148	48880672-48884369	MSTRG.13148.1(48880672:48884189);MSTRG.13148.2(48880673:48884369);MSTRG.13148.3(48883726:48884256)
10	48883573	48883573	-	48883573	intergenic	MSTRG.13148	48880672-48884369	MSTRG.13148.1(48880672:48884189);MSTRG.13148.2(48880673:48884369);MSTRG.13148.3(48883726:48884256)
10	48883733	48883733	-	48883733	intergenic	MSTRG.13148	48880672-48884369	MSTRG.13148.1(48880672:48884189);MSTRG.13148.2(48880673:48884369);MSTRG.13148.3(48883726:48884256)
10	48883758	48883758	-	48883758	intergenic	MSTRG.13148	48880672-48884369	MSTRG.13148.1(48880672:48884189);MSTRG.13148.2(48880673:48884369);MSTRG.13148.3(48883726:48884256)
10	51854679	51854768	-	51854686	intergenic	MSTRG.13190	51854596-51854975	MSTRG.13190.1(51854596:51854975)
10	56995500	56995522	-	56995508	intergenic	MSTRG.13257	56995427-57063030	MSTRG.13257.1(56995427:57063030);Zm00001d024213_T001(56996605:56997874)
10	56995574	56995580	-	56995580	intergenic	MSTRG.13257	56995427-57063030	MSTRG.13257.1(56995427:57063030);Zm00001d024213_T001(56996605:56997874)
10	63452554	63452582	-	63452564	intergenic	MSTRG.13368	63452345-63457463	MSTRG.13368.1(63452345:63457389);MSTRG.13368.2(63452345:63457416);MSTRG.13368.3(63452348:63457419);MSTRG.13368.4(63452348:63457375);MSTRG.13368.5(63452377:63457371);MSTRG.13368.6(63452377:63457367);MSTRG.13368.7(63452465:63457336);MSTRG.13368.8(63452524:63457123);MSTRG.13368.9(63452562:63457056);MSTRG.13368.10(63452565:63457371);MSTRG.13368.11(63452566:63457342);MSTRG.13368.12(63452574:63457192);…
10	63452616	63452665	-	63452616	intergenic	MSTRG.13368	63452345-63457463	MSTRG.13368.1(63452345:63457389);MSTRG.13368.2(63452345:63457416);MSTRG.13368.3(63452348:63457419);MSTRG.13368.4(63452348:63457375);MSTRG.13368.5(63452377:63457371);MSTRG.13368.6(63452377:63457367);MSTRG.13368.7(63452465:63457336);MSTRG.13368.8(63452524:63457123);MSTRG.13368.9(63452562:63457056);MSTRG.13368.10(63452565:63457371);MSTRG.13368.11(63452566:63457342);MSTRG.13368.12(63452574:63457192);…
10	63452710	63452741	-	63452710	intergenic	MSTRG.13368	63452345-63457463	MSTRG.13368.1(63452345:63457389);MSTRG.13368.2(63452345:63457416);MSTRG.13368.3(63452348:63457419);MSTRG.13368.4(63452348:63457375);MSTRG.13368.5(63452377:63457371);MSTRG.13368.6(63452377:63457367);MSTRG.13368.7(63452465:63457336);MSTRG.13368.8(63452524:63457123);MSTRG.13368.9(63452562:63457056);MSTRG.13368.10(63452565:63457371);MSTRG.13368.11(63452566:63457342);MSTRG.13368.12(63452574:63457192);…
10	64272552	64272552	-	64272552	intergenic	MSTRG.13382	64272471-64275505	MSTRG.13382.1(64272471:64275505)
10	64365986	64366009	-	64365992	intergenic	MSTRG.13384	64365950-64379576	MSTRG.13384.1(64365950:64379576);Zm00001d024321_T001(64378201:64379576)
10	64366035	64366082	-	64366070	intergenic	MSTRG.13384	64365950-64379576	MSTRG.13384.1(64365950:64379576);Zm00001d024321_T001(64378201:64379576)
10	68193443	68193443	-	68193443	intergenic	MSTRG.13459	68164364-68325959	MSTRG.13459.1(68164364:68325857);MSTRG.13459.2(68164477:68325959);MSTRG.13459.3(68164523:68325959);MSTRG.13459.4(68164577:68325800);MSTRG.13459.5(68164636:68165808);Zm00001d024379_T001(68164948:68165808);Zm00001d024382_T001(68270859:68272288);MSTRG.13459.8(68270880:68325859);MSTRG.13459.9(68270900:68325856);Zm00001d024386_T001(68324451:68325959);Zm00001d024386_T002(68324452:68325959);Zm00001d0243…
10	69004204	69004211	-	69004204	intergenic	MSTRG.13481	69000148-69004800	MSTRG.13481.1(69000148:69004800)
10	70052719	70052748	-	70052748	intergenic	MSTRG.13502	70052690-70053219	MSTRG.13502.1(70052690:70053219)
10	70413775	70413775	-	70413775	intergenic	MSTRG.13517	70413677-70420011	MSTRG.13517.1(70413677:70420011);Zm00001d024424_T001(70414238:70420011)
10	70413811	70413811	-	70413811	intergenic	MSTRG.13517	70413677-70420011	MSTRG.13517.1(70413677:70420011);Zm00001d024424_T001(70414238:70420011)
10	74958069	74958069	-	74958069	intergenic	MSTRG.13633	74909570-74958169	MSTRG.13633.1(74909570:74958169);MSTRG.13633.2(74951518:74958092)
10	76461515	76461515	-	76461515	intergenic	MSTRG.13658	76137118-76473246	MSTRG.13658.1(76137118:76473125);MSTRG.13658.2(76137265:76473246);MSTRG.13658.3(76470563:76473209);MSTRG.13658.4(76470674:76473189)
10	76469878	76469878	-	76469878	intergenic	MSTRG.13658	76137118-76473246	MSTRG.13658.1(76137118:76473125);MSTRG.13658.2(76137265:76473246);MSTRG.13658.3(76470563:76473209);MSTRG.13658.4(76470674:76473189)
10	76469903	76469908	-	76469908	intergenic	MSTRG.13658	76137118-76473246	MSTRG.13658.1(76137118:76473125);MSTRG.13658.2(76137265:76473246);MSTRG.13658.3(76470563:76473209);MSTRG.13658.4(76470674:76473189)
10	76470046	76470046	-	76470046	intergenic	MSTRG.13658	76137118-76473246	MSTRG.13658.1(76137118:76473125);MSTRG.13658.2(76137265:76473246);MSTRG.13658.3(76470563:76473209);MSTRG.13658.4(76470674:76473189)
10	76471618	76471618	-	76471618	intergenic	MSTRG.13658	76137118-76473246	MSTRG.13658.1(76137118:76473125);MSTRG.13658.2(76137265:76473246);MSTRG.13658.3(76470563:76473209);MSTRG.13658.4(76470674:76473189)
10	76471672	76471675	-	76471675	intergenic	MSTRG.13658	76137118-76473246	MSTRG.13658.1(76137118:76473125);MSTRG.13658.2(76137265:76473246);MSTRG.13658.3(76470563:76473209);MSTRG.13658.4(76470674:76473189)
10	76471700	76471700	-	76471700	intergenic	MSTRG.13658	76137118-76473246	MSTRG.13658.1(76137118:76473125);MSTRG.13658.2(76137265:76473246);MSTRG.13658.3(76470563:76473209);MSTRG.13658.4(76470674:76473189)
10	77074344	77074345	-	77074344	intergenic	MSTRG.13679	77074260-77079341	MSTRG.13679.1(77074260:77079341);MSTRG.13679.2(77074260:77079336);Zm00001d024538_T001(77078388:77079341)
10	77074387	77074485	-	77074443	intergenic	MSTRG.13679	77074260-77079341	MSTRG.13679.1(77074260:77079341);MSTRG.13679.2(77074260:77079336);Zm00001d024538_T001(77078388:77079341)
10	77699899	77699899	-	77699899	intergenic	MSTRG.13693	77698864-77758741	MSTRG.13693.1(77698864:77758741);MSTRG.13693.2(77698864:77758697);MSTRG.13693.3(77698896:77743659);MSTRG.13693.4(77699467:77758601);MSTRG.13693.5(77699662:77758710);MSTRG.13693.6(77699828:77758697);MSTRG.13693.7(77699828:77729019);MSTRG.13693.8(77699885:77758700);MSTRG.13693.9(77699885:77758100);Zm00001d024546_T001(77700138:77703390);Zm00001d024546_T002(77700285:77702122);Zm00001d024547_T001(7772…
10	77767602	77767746	-	77767732	intergenic	MSTRG.13697	77767699-77768256	MSTRG.13697.1(77767699:77768256)
10	77775724	77775724	-	77775724	intergenic	MSTRG.13698	77772197-77794932	MSTRG.13698.1(77772197:77794932);Zm00001d024548_T001(77772197:77772878);MSTRG.13698.3(77772250:77794932);MSTRG.13698.4(77772250:77788338);MSTRG.13698.5(77772250:77794932);MSTRG.13698.6(77784992:77788275)
10	83536453	83536507	-	83536488	intergenic	MSTRG.13876;MSTRG.13879	83470652-83550002;83535312-83537632	MSTRG.13876.1(83470652:83550002);MSTRG.13876.2(83549440:83549972);MSTRG.13879.1(83535312:83537632)
10	87316061	87316065	-	87316061	intergenic	MSTRG.14000	87316007-87317390	MSTRG.14000.1(87316007:87317390)
10	87316133	87316133	-	87316133	intergenic	MSTRG.14000	87316007-87317390	MSTRG.14000.1(87316007:87317390)
10	87316176	87316176	-	87316176	intergenic	MSTRG.14000	87316007-87317390	MSTRG.14000.1(87316007:87317390)
10	87316201	87316228	-	87316228	intergenic	MSTRG.14000	87316007-87317390	MSTRG.14000.1(87316007:87317390)
10	87316319	87316334	-	87316319	intergenic	MSTRG.14000	87316007-87317390	MSTRG.14000.1(87316007:87317390)
10	87316421	87316421	-	87316421	intergenic	MSTRG.14000	87316007-87317390	MSTRG.14000.1(87316007:87317390)
10	87316611	87316611	-	87316611	intergenic	MSTRG.14000	87316007-87317390	MSTRG.14000.1(87316007:87317390)
10	87964162	87964164	-	87964162	intergenic	MSTRG.14015	87962974-87976336	MSTRG.14015.1(87962974:87976287);MSTRG.14015.2(87962974:87976229);MSTRG.14015.3(87973213:87976250);Zm00001d024784_T001(87973477:87976336)
10	88358018	88358018	-	88358018	intergenic	MSTRG.14018	88357975-88366962	MSTRG.14018.1(88357975:88366962)
10	88557796	88557820	-	88557796	intergenic	MSTRG.14024	88557705-88564286	MSTRG.14024.1(88557705:88564286)
10	88561349	88561349	-	88561349	intergenic	MSTRG.14024	88557705-88564286	MSTRG.14024.1(88557705:88564286)
10	89226185	89226185	-	89226185	intergenic	MSTRG.14050	89226088-89226797	MSTRG.14050.1(89226088:89226797)
10	89691601	89691601	-	89691601	intergenic	MSTRG.14068	89687173-89692165	MSTRG.14068.1(89687173:89692165);MSTRG.14068.2(89687229:89692115);Zm00001d024824_T001(89687263:89690813)
10	89691631	89691631	-	89691631	intergenic	MSTRG.14068	89687173-89692165	MSTRG.14068.1(89687173:89692165);MSTRG.14068.2(89687229:89692115);Zm00001d024824_T001(89687263:89690813)
10	90382315	90382367	-	90382325	intergenic	MSTRG.14090	90378136-90385822	MSTRG.14090.1(90378136:90385822);Zm00001d024839_T001(90384434:90385822)
10	90383206	90383206	-	90383206	intergenic	MSTRG.14090	90378136-90385822	MSTRG.14090.1(90378136:90385822);Zm00001d024839_T001(90384434:90385822)
10	90671415	90671415	-	90671415	intergenic	MSTRG.14104	90663414-90682705	MSTRG.14104.1(90663414:90682608);Zm00001d024855_T005(90671654:90682705);Zm00001d024855_T001(90671654:90674569);Zm00001d024855_T002(90671654:90682607);Zm00001d024855_T007(90671654:90682705);Zm00001d024855_T006(90671654:90682705);Zm00001d024855_T004(90671654:90682705);Zm00001d024855_T003(90671654:90682705);Zm00001d024855_T008(90671655:90682438);Zm00001d024855_T009(90671656:90682590);Zm00001d024855_…
10	91636650	91636650	-	91636650	intergenic	MSTRG.14127	91636403-91637475	MSTRG.14127.1(91636403:91637475)
10	92687729	92687729	-	92687729	intergenic	MSTRG.14150	92687720-92688220	MSTRG.14150.1(92687720:92688220)
10	92687835	92687859	-	92687859	intergenic	MSTRG.14150	92687720-92688220	MSTRG.14150.1(92687720:92688220)
10	92761236	92761236	-	92761236	intergenic	MSTRG.14153	92761097-92763041	MSTRG.14153.1(92761097:92763041);MSTRG.14153.2(92761097:92763041)
10	94179548	94179548	-	94179548	intergenic	MSTRG.14180	94179519-94182716	MSTRG.14180.1(94179519:94182716)
10	94908317	94908317	-	94908317	intergenic	MSTRG.14201	94908237-94991623	MSTRG.14201.1(94908237:94991481);Zm00001d024919_T001(94989364:94991623)
10	94908524	94908621	-	94908599	intergenic	MSTRG.14201	94908237-94991623	MSTRG.14201.1(94908237:94991481);Zm00001d024919_T001(94989364:94991623)
10	94908656	94908656	-	94908656	intergenic	MSTRG.14201	94908237-94991623	MSTRG.14201.1(94908237:94991481);Zm00001d024919_T001(94989364:94991623)
10	94917326	94917343	-	94917343	intergenic	MSTRG.14201	94908237-94991623	MSTRG.14201.1(94908237:94991481);Zm00001d024919_T001(94989364:94991623)
10	94917390	94917390	-	94917390	intergenic	MSTRG.14201	94908237-94991623	MSTRG.14201.1(94908237:94991481);Zm00001d024919_T001(94989364:94991623)
10	94917859	94917859	-	94917859	intergenic	MSTRG.14201	94908237-94991623	MSTRG.14201.1(94908237:94991481);Zm00001d024919_T001(94989364:94991623)
10	94918020	94918020	-	94918020	intergenic	MSTRG.14201	94908237-94991623	MSTRG.14201.1(94908237:94991481);Zm00001d024919_T001(94989364:94991623)
10	94927895	94927895	-	94927895	intergenic	MSTRG.14201	94908237-94991623	MSTRG.14201.1(94908237:94991481);Zm00001d024919_T001(94989364:94991623)
10	94986867	94986867	-	94986867	intergenic	MSTRG.14201	94908237-94991623	MSTRG.14201.1(94908237:94991481);Zm00001d024919_T001(94989364:94991623)
10	94988854	94988854	-	94988854	intergenic	MSTRG.14201	94908237-94991623	MSTRG.14201.1(94908237:94991481);Zm00001d024919_T001(94989364:94991623)
10	94988882	94988889	-	94988889	intergenic	MSTRG.14201	94908237-94991623	MSTRG.14201.1(94908237:94991481);Zm00001d024919_T001(94989364:94991623)
10	95805299	95805299	-	95805299	intergenic	MSTRG.14236	95794069-95805364	MSTRG.14236.1(95794069:95805364)
10	96594241	96594241	-	96594241	intergenic	MSTRG.14267	96586357-96658868	MSTRG.14267.1(96586357:96595081);MSTRG.14267.2(96586357:96658726);MSTRG.14267.3(96586357:96595050);MSTRG.14267.4(96586361:96595066);Zm00001d024952_T005(96586361:96592679);Zm00001d024952_T001(96586361:96592679);Zm00001d024952_T003(96586361:96592679);Zm00001d024952_T004(96586361:96592679);Zm00001d024952_T002(96586361:96592679);MSTRG.14267.10(96586364:96595138);MSTRG.14267.11(96586435:96658726);Zm00…
10	99718479	99718536	-	99718505	intergenic	MSTRG.14339	99718488-99719208	MSTRG.14339.1(99718488:99719208)
10	99718573	99718590	-	99718590	intergenic	MSTRG.14339	99718488-99719208	MSTRG.14339.1(99718488:99719208)
10	99718622	99718653	-	99718653	intergenic	MSTRG.14339	99718488-99719208	MSTRG.14339.1(99718488:99719208)
10	99816440	99816440	-	99816440	intergenic	MSTRG.14343	99806764-99820500	MSTRG.14343.1(99806764:99820491);MSTRG.14343.2(99808729:99820500);MSTRG.14343.3(99817357:99820500);MSTRG.14343.4(99817386:99820500);MSTRG.14343.5(99817429:99820491);MSTRG.14343.6(99817435:99820425);MSTRG.14343.7(99817486:99820388);MSTRG.14343.8(99817486:99820495);Zm00001d025017_T001(99817486:99819538);MSTRG.14343.10(99817487:99820470);MSTRG.14343.11(99817542:99820470);MSTRG.14343.12(99817561:9982…
10	101378922	101378922	-	101378922	intergenic	MSTRG.14394	101345771-101379910	MSTRG.14394.1(101345771:101379910)
10	102827238	102827241	-	102827241	intergenic	MSTRG.14441	102821052-102829001	MSTRG.14441.1(102821052:102828960);Zm00001d025079_T001(102821133:102823238);Zm00001d025080_T001(102828219:102829001)
10	102849952	102849952	-	102849952	intergenic	MSTRG.14443	102847858-102857550	MSTRG.14443.1(102847858:102857466);MSTRG.14443.2(102850920:102857511);MSTRG.14443.3(102855211:102857550);Zm00001d025081_T001(102855786:102857522);Zm00001d025081_T002(102855786:102857533);MSTRG.14443.6(102855873:102857241);MSTRG.14443.7(102855886:102857217);Zm00001d025081_T003(102855964:102857533);Zm00001d025081_T004(102855971:102857528)
10	104320860	104320860	-	104320860	intergenic	MSTRG.14466	104272441-104361524	MSTRG.14466.1(104272441:104361524);MSTRG.14466.2(104272526:104361505);MSTRG.14466.3(104272526:104361437);MSTRG.14466.4(104272602:104361436);MSTRG.14466.5(104272620:104361422);MSTRG.14466.6(104272636:104361455);MSTRG.14466.7(104272691:104361474);Zm00001d025104_T001(104272691:104276312);Zm00001d025104_T002(104272825:104280111);MSTRG.14466.10(104274624:104361423);Zm00001d025105_T001(104358643:104361…
10	104330896	104330896	-	104330896	intergenic	MSTRG.14466	104272441-104361524	MSTRG.14466.1(104272441:104361524);MSTRG.14466.2(104272526:104361505);MSTRG.14466.3(104272526:104361437);MSTRG.14466.4(104272602:104361436);MSTRG.14466.5(104272620:104361422);MSTRG.14466.6(104272636:104361455);MSTRG.14466.7(104272691:104361474);Zm00001d025104_T001(104272691:104276312);Zm00001d025104_T002(104272825:104280111);MSTRG.14466.10(104274624:104361423);Zm00001d025105_T001(104358643:104361…
10	104595745	104595745	-	104595745	intergenic	MSTRG.14470	104574161-104604776	MSTRG.14470.1(104574161:104575544);MSTRG.14470.2(104574162:104576664);MSTRG.14470.3(104574184:104604776);Zm00001d025107_T001(104574417:104575544)
10	104739466	104739468	-	104739468	intergenic	MSTRG.14472	104739468-104745122	MSTRG.14472.1(104739468:104745122);MSTRG.14472.2(104739484:104743249);Zm00001d025108_T001(104743938:104745122)
10	105692268	105692268	-	105692268	intergenic	MSTRG.14500	105692040-105720443	MSTRG.14500.1(105692040:105701575);MSTRG.14500.2(105692235:105695984);MSTRG.14500.3(105692363:105716874);Zm00001d025130_T001(105692426:105720443);Zm00001d025130_T002(105692591:105720443);Zm00001d025130_T003(105695163:105695984);Zm00001d025130_T004(105715093:105720443)
10	106620161	106620161	-	106620161	intergenic	MSTRG.14528	106620060-106620686	MSTRG.14528.1(106620060:106620686)
10	107513112	107513112	-	107513112	intergenic	MSTRG.14566	107513002-107513887	MSTRG.14566.1(107513002:107513887)
10	111399341	111399341	-	111399341	intergenic	MSTRG.14674	111399012-111453781	MSTRG.14674.1(111399012:111400020);MSTRG.14674.2(111399089:111453541);MSTRG.14674.3(111399089:111453541);MSTRG.14674.4(111445746:111451555);Zm00001d025255_T001(111450959:111453781)
10	113466387	113466387	-	113466387	intergenic	MSTRG.14736	113466387-113466814	MSTRG.14736.1(113466387:113466814)
10	113470501	113470508	-	113470501	intergenic	MSTRG.14738	113470035-113471073	MSTRG.14738.1(113470035:113471073)
10	113470973	113470973	-	113470973	intergenic	MSTRG.14738	113470035-113471073	MSTRG.14738.1(113470035:113471073)
10	113916161	113916161	-	113916161	intergenic	MSTRG.14749	113837976-114037523	MSTRG.14749.1(113837976:114037523);Zm00001d025310_T001(113838140:113839870)
10	115365934	115365934	-	115365934	intergenic	MSTRG.14805	115365451-115367047	MSTRG.14805.1(115365451:115367047)
10	115366210	115366273	-	115366273	intergenic	MSTRG.14805	115365451-115367047	MSTRG.14805.1(115365451:115367047)
10	115366301	115366307	-	115366307	intergenic	MSTRG.14805	115365451-115367047	MSTRG.14805.1(115365451:115367047)
10	115366386	115366388	-	115366387	intergenic	MSTRG.14805	115365451-115367047	MSTRG.14805.1(115365451:115367047)
10	115366419	115366419	-	115366419	intergenic	MSTRG.14805	115365451-115367047	MSTRG.14805.1(115365451:115367047)
10	115366559	115366559	-	115366559	intergenic	MSTRG.14805	115365451-115367047	MSTRG.14805.1(115365451:115367047)
10	120154573	120154573	-	120154573	intergenic	MSTRG.14987	120154359-120154856	MSTRG.14987.1(120154359:120154856)
10	121063522	121063522	-	121063522	intergenic	MSTRG.15023	121063108-121084106	MSTRG.15023.1(121063108:121084076);MSTRG.15023.2(121063200:121084049);Zm00001d025520_T001(121082402:121084106)
10	121064506	121064520	-	121064520	intergenic	MSTRG.15023	121063108-121084106	MSTRG.15023.1(121063108:121084076);MSTRG.15023.2(121063200:121084049);Zm00001d025520_T001(121082402:121084106)
10	121759927	121759927	-	121759927	intergenic	MSTRG.15044	121759873-121760140	MSTRG.15044.1(121759873:121760140)
10	122794377	122794377	-	122794377	intergenic	MSTRG.15099	122791874-122795165	MSTRG.15099.1(122791874:122795165)
10	123296543	123296543	-	123296543	intergenic	MSTRG.15114	123295302-123299277	MSTRG.15114.1(123295302:123299277);MSTRG.15114.2(123297388:123299227);Zm00001d025587_T001(123297388:123299277)
10	123896697	123896786	-	123896713	intergenic	MSTRG.15135	123896583-123897357	MSTRG.15135.1(123896583:123897357)
10	123896811	123896828	-	123896828	intergenic	MSTRG.15135	123896583-123897357	MSTRG.15135.1(123896583:123897357)
10	124227166	124227166	-	124227166	intergenic	MSTRG.15144	124153767-124274791	MSTRG.15144.1(124153767:124274791);MSTRG.15144.2(124217756:124228964);Zm00001d025619_T001(124227762:124229007)
10	124405388	124405418	-	124405418	intergenic	MSTRG.15154	124405394-124409576	MSTRG.15154.1(124405394:124409576);MSTRG.15154.2(124405412:124409521);Zm00001d025625_T001(124407255:124409576)
10	124406745	124406745	-	124406745	intergenic	MSTRG.15154	124405394-124409576	MSTRG.15154.1(124405394:124409576);MSTRG.15154.2(124405412:124409521);Zm00001d025625_T001(124407255:124409576)
10	124522349	124522373	-	124522360	intergenic	MSTRG.15160	124518820-124523189	MSTRG.15160.1(124518820:124523189);MSTRG.15160.2(124518966:124523167);MSTRG.15160.3(124519005:124523004)
10	124522441	124522553	-	124522510	intergenic	MSTRG.15160	124518820-124523189	MSTRG.15160.1(124518820:124523189);MSTRG.15160.2(124518966:124523167);MSTRG.15160.3(124519005:124523004)
10	124522648	124522648	-	124522648	intergenic	MSTRG.15160	124518820-124523189	MSTRG.15160.1(124518820:124523189);MSTRG.15160.2(124518966:124523167);MSTRG.15160.3(124519005:124523004)
10	125989231	125989231	-	125989231	intergenic	MSTRG.15236	125988845-125989611	MSTRG.15236.1(125988845:125989611)
10	126536055	126536055	-	126536055	intergenic	MSTRG.15267	126535851-126536443	MSTRG.15267.1(126535851:126536443)
10	126536162	126536197	-	126536166	intergenic	MSTRG.15267	126535851-126536443	MSTRG.15267.1(126535851:126536443)
10	126536231	126536231	-	126536231	intergenic	MSTRG.15267	126535851-126536443	MSTRG.15267.1(126535851:126536443)
10	127667905	127667905	-	127667905	intergenic	MSTRG.15329	127667848-127678365	MSTRG.15329.1(127667848:127678365);Zm00001d025727_T001(127668399:127670693);Zm00001d025727_T002(127668399:127671219);Zm00001d025727_T005(127668399:127671574);Zm00001d025727_T003(127668399:127671574);Zm00001d025727_T004(127668399:127671574);Zm00001d025727_T006(127668399:127675832);Zm00001d025727_T007(127668399:127678365);Zm00001d025727_T008(127668404:127671574);Zm00001d025727_T009(127668420:127671…
10	127929332	127929332	-	127929332	intergenic	MSTRG.15335	127921045-127929708	MSTRG.15335.1(127921045:127929708)
10	128476872	128476872	-	128476872	intergenic	MSTRG.15368	128476817-128477419	MSTRG.15368.1(128476817:128477419)
10	128651073	128651073	-	128651073	intergenic	MSTRG.15374	128636493-128657893	MSTRG.15374.1(128636493:128657892);MSTRG.15374.2(128651685:128657866);Zm00001d025763_T003(128651685:128657892);Zm00001d025763_T004(128651685:128657893);Zm00001d025763_T002(128651685:128657892);Zm00001d025763_T001(128651685:128652745);Zm00001d025763_T005(128651690:128657872);MSTRG.15374.8(128651718:128657794);MSTRG.15374.9(128651718:128657808);MSTRG.15374.10(128651718:128657721);MSTRG.15374.11(128…
10	129638411	129638411	-	129638411	intergenic	MSTRG.15416	129635133-129643517	MSTRG.15416.1(129635133:129643500);MSTRG.15416.2(129640688:129643517);MSTRG.15416.3(129640690:129643373);MSTRG.15416.4(129640692:129643390);MSTRG.15416.5(129640695:129642783);zma-mir156h(129642870:129642984);ENSRNA049463188-T1(129642887:129642966)
10	129638983	129639002	-	129639002	intergenic	MSTRG.15416	129635133-129643517	MSTRG.15416.1(129635133:129643500);MSTRG.15416.2(129640688:129643517);MSTRG.15416.3(129640690:129643373);MSTRG.15416.4(129640692:129643390);MSTRG.15416.5(129640695:129642783);zma-mir156h(129642870:129642984);ENSRNA049463188-T1(129642887:129642966)
10	129639296	129639296	-	129639296	intergenic	MSTRG.15416	129635133-129643517	MSTRG.15416.1(129635133:129643500);MSTRG.15416.2(129640688:129643517);MSTRG.15416.3(129640690:129643373);MSTRG.15416.4(129640692:129643390);MSTRG.15416.5(129640695:129642783);zma-mir156h(129642870:129642984);ENSRNA049463188-T1(129642887:129642966)
10	129641534	129641534	-	129641534	intergenic	MSTRG.15416	129635133-129643517	MSTRG.15416.1(129635133:129643500);MSTRG.15416.2(129640688:129643517);MSTRG.15416.3(129640690:129643373);MSTRG.15416.4(129640692:129643390);MSTRG.15416.5(129640695:129642783);zma-mir156h(129642870:129642984);ENSRNA049463188-T1(129642887:129642966)
10	129641561	129641561	-	129641561	intergenic	MSTRG.15416	129635133-129643517	MSTRG.15416.1(129635133:129643500);MSTRG.15416.2(129640688:129643517);MSTRG.15416.3(129640690:129643373);MSTRG.15416.4(129640692:129643390);MSTRG.15416.5(129640695:129642783);zma-mir156h(129642870:129642984);ENSRNA049463188-T1(129642887:129642966)
10	129641633	129641633	-	129641633	intergenic	MSTRG.15416	129635133-129643517	MSTRG.15416.1(129635133:129643500);MSTRG.15416.2(129640688:129643517);MSTRG.15416.3(129640690:129643373);MSTRG.15416.4(129640692:129643390);MSTRG.15416.5(129640695:129642783);zma-mir156h(129642870:129642984);ENSRNA049463188-T1(129642887:129642966)
10	129641677	129641677	-	129641677	intergenic	MSTRG.15416	129635133-129643517	MSTRG.15416.1(129635133:129643500);MSTRG.15416.2(129640688:129643517);MSTRG.15416.3(129640690:129643373);MSTRG.15416.4(129640692:129643390);MSTRG.15416.5(129640695:129642783);zma-mir156h(129642870:129642984);ENSRNA049463188-T1(129642887:129642966)
10	129641707	129641707	-	129641707	intergenic	MSTRG.15416	129635133-129643517	MSTRG.15416.1(129635133:129643500);MSTRG.15416.2(129640688:129643517);MSTRG.15416.3(129640690:129643373);MSTRG.15416.4(129640692:129643390);MSTRG.15416.5(129640695:129642783);zma-mir156h(129642870:129642984);ENSRNA049463188-T1(129642887:129642966)
10	129641737	129641739	-	129641737	intergenic	MSTRG.15416	129635133-129643517	MSTRG.15416.1(129635133:129643500);MSTRG.15416.2(129640688:129643517);MSTRG.15416.3(129640690:129643373);MSTRG.15416.4(129640692:129643390);MSTRG.15416.5(129640695:129642783);zma-mir156h(129642870:129642984);ENSRNA049463188-T1(129642887:129642966)
10	129641771	129641806	-	129641793	intergenic	MSTRG.15416	129635133-129643517	MSTRG.15416.1(129635133:129643500);MSTRG.15416.2(129640688:129643517);MSTRG.15416.3(129640690:129643373);MSTRG.15416.4(129640692:129643390);MSTRG.15416.5(129640695:129642783);zma-mir156h(129642870:129642984);ENSRNA049463188-T1(129642887:129642966)
10	130624152	130624152	-	130624152	intergenic	MSTRG.15468	130624105-130626396	MSTRG.15468.1(130624105:130626348);MSTRG.15468.2(130624158:130626331);MSTRG.15468.3(130624161:130626346);Zm00001d025819_T001(130624314:130626396)
10	131099488	131099488	-	131099488	intergenic	MSTRG.15482	131090767-131103822	MSTRG.15482.1(131090767:131103822)
10	131526735	131526735	-	131526735	intergenic	MSTRG.15523	131526716-131528218	MSTRG.15523.1(131526716:131528218)
10	132095454	132095454	-	132095454	intergenic	MSTRG.15552	132095063-132097407	MSTRG.15552.1(132095063:132097407)
10	132101254	132101254	-	132101254	intergenic	MSTRG.15554	132101165-132108070	MSTRG.15554.1(132101165:132108070);MSTRG.15554.2(132101354:132103647);Zm00001d025870_T001(132102174:132108037)
10	132101279	132101279	-	132101279	intergenic	MSTRG.15554	132101165-132108070	MSTRG.15554.1(132101165:132108070);MSTRG.15554.2(132101354:132103647);Zm00001d025870_T001(132102174:132108037)
10	132101326	132101333	-	132101326	intergenic	MSTRG.15554	132101165-132108070	MSTRG.15554.1(132101165:132108070);MSTRG.15554.2(132101354:132103647);Zm00001d025870_T001(132102174:132108037)
10	133214251	133214251	-	133214251	intergenic	MSTRG.15583	133211216-133214953	MSTRG.15583.1(133211216:133214953)
10	133420472	133420472	-	133420472	intergenic	MSTRG.15604	133418507-133428862	MSTRG.15604.1(133418507:133428862);MSTRG.15604.2(133421421:133424205);Zm00001d025904_T001(133421472:133424984);MSTRG.15604.4(133421575:133424176)
10	133664131	133664131	-	133664131	intergenic	MSTRG.15611	133608677-133679949	MSTRG.15611.1(133608677:133665877);MSTRG.15611.2(133661730:133679949);MSTRG.15611.3(133664218:133665887);MSTRG.15611.4(133664952:133665806);Zm00001d025913_T001(133665354:133665806)
10	133845456	133845456	-	133845456	intergenic	MSTRG.15634	133844587-133846464	MSTRG.15634.1(133844587:133846464)
10	134023367	134023367	-	134023367	intergenic	MSTRG.15640	134023287-134029024	MSTRG.15640.1(134023287:134028964);MSTRG.15640.2(134023289:134028877);MSTRG.15640.3(134023293:134028951);MSTRG.15640.4(134023296:134028964);MSTRG.15640.5(134023296:134028964);MSTRG.15640.6(134023296:134028840);MSTRG.15640.7(134023298:134028964);MSTRG.15640.8(134023300:134028964);Zm00001d025931_T001(134023690:134026832);Zm00001d025931_T002(134024212:134026832);Zm00001d025931_T003(134024212:1340290…
10	134613961	134613961	-	134613961	intergenic	MSTRG.15669	134549808-134615062	MSTRG.15669.1(134549808:134567767);Zm00001d025951_T011(134563080:134575911);Zm00001d025951_T005(134563080:134575299);Zm00001d025951_T008(134563080:134575911);Zm00001d025951_T012(134563080:134575911);Zm00001d025951_T006(134563080:134575911);Zm00001d025951_T002(134563080:134575299);Zm00001d025951_T003(134563080:134575299);Zm00001d025951_T013(134563080:134575911);Zm00001d025951_T010(134563080:134575…
10	134918839	134918839	-	134918839	intergenic	MSTRG.15685	134918607-134923032	MSTRG.15685.1(134918607:134923032);MSTRG.15685.2(134918663:134921865);MSTRG.15685.3(134918716:134921915);MSTRG.15685.4(134918820:134923016);MSTRG.15685.5(134918821:134921887);Zm00001d025960_T004(134919047:134922822);Zm00001d025960_T001(134919047:134920400);Zm00001d025960_T002(134919047:134922703);Zm00001d025960_T005(134919052:134922822)
10	134985936	134985936	-	134985936	intergenic	MSTRG.15697	134976805-134991238	MSTRG.15697.1(134976805:134991238);MSTRG.15697.2(134976909:134978302);MSTRG.15697.3(134976920:134977651)
10	135455396	135455453	-	135455433	intergenic	MSTRG.15737	135455354-135492026	MSTRG.15737.1(135455354:135491209);MSTRG.15737.2(135455377:135491205);MSTRG.15737.3(135455427:135491192);MSTRG.15737.4(135464938:135491080);MSTRG.15737.5(135487493:135491089);MSTRG.15737.6(135487493:135491176);Zm00001d025989_T001(135487493:135491257);Zm00001d025989_T002(135487493:135492026)
10	135455486	135455540	-	135455492	intergenic	MSTRG.15737	135455354-135492026	MSTRG.15737.1(135455354:135491209);MSTRG.15737.2(135455377:135491205);MSTRG.15737.3(135455427:135491192);MSTRG.15737.4(135464938:135491080);MSTRG.15737.5(135487493:135491089);MSTRG.15737.6(135487493:135491176);Zm00001d025989_T001(135487493:135491257);Zm00001d025989_T002(135487493:135492026)
10	135455572	135455572	-	135455572	intergenic	MSTRG.15737	135455354-135492026	MSTRG.15737.1(135455354:135491209);MSTRG.15737.2(135455377:135491205);MSTRG.15737.3(135455427:135491192);MSTRG.15737.4(135464938:135491080);MSTRG.15737.5(135487493:135491089);MSTRG.15737.6(135487493:135491176);Zm00001d025989_T001(135487493:135491257);Zm00001d025989_T002(135487493:135492026)
10	135455625	135455625	-	135455625	intergenic	MSTRG.15737	135455354-135492026	MSTRG.15737.1(135455354:135491209);MSTRG.15737.2(135455377:135491205);MSTRG.15737.3(135455427:135491192);MSTRG.15737.4(135464938:135491080);MSTRG.15737.5(135487493:135491089);MSTRG.15737.6(135487493:135491176);Zm00001d025989_T001(135487493:135491257);Zm00001d025989_T002(135487493:135492026)
10	135687718	135687718	-	135687718	intergenic	MSTRG.15750	135684193-135687799	MSTRG.15750.1(135684193:135687799)
10	136179053	136179053	-	136179053	intergenic	MSTRG.15775	136175301-136179177	MSTRG.15775.1(136175301:136179177)
10	136364524	136364555	-	136364537	intergenic	MSTRG.15790	136364407-136364899	MSTRG.15790.1(136364407:136364899)
10	136624060	136624060	-	136624060	intergenic	MSTRG.15806	136619021-136624935	MSTRG.15806.1(136619021:136624935);MSTRG.15806.2(136623951:136624935);Zm00001d026037_T001(136624597:136624935)
10	136624099	136624099	-	136624099	intergenic	MSTRG.15806	136619021-136624935	MSTRG.15806.1(136619021:136624935);MSTRG.15806.2(136623951:136624935);Zm00001d026037_T001(136624597:136624935)
10	137222909	137222909	-	137222909	intergenic	MSTRG.15829	137222830-137225426	MSTRG.15829.1(137222830:137225426)
10	137223308	137223308	-	137223308	intergenic	MSTRG.15829	137222830-137225426	MSTRG.15829.1(137222830:137225426)
10	137911256	137911364	-	137911309	intergenic	MSTRG.15863	137911247-137911784	MSTRG.15863.1(137911247:137911784)
10	137911441	137911468	-	137911445	intergenic	MSTRG.15863	137911247-137911784	MSTRG.15863.1(137911247:137911784)
10	137912895	137912916	-	137912895	intergenic	MSTRG.15865	137912715-137913018	MSTRG.15865.1(137912715:137913018)
10	140142639	140142639	-	140142639	intergenic	MSTRG.15984	140119312-140166027	MSTRG.15984.1(140119312:140166027);MSTRG.15984.2(140119312:140146809);MSTRG.15984.3(140119312:140146791);MSTRG.15984.4(140119312:140146762);MSTRG.15984.5(140119312:140146723);MSTRG.15984.6(140119312:140146723);MSTRG.15984.7(140119312:140143646);MSTRG.15984.8(140119312:140146714);Zm00001d026162_T001(140119312:140119716);Zm00001d026163_T001(140143158:140146714);Zm00001d026163_T002(140145949:1401468…
10	140161991	140161991	-	140161991	intergenic	MSTRG.15984	140119312-140166027	MSTRG.15984.1(140119312:140166027);MSTRG.15984.2(140119312:140146809);MSTRG.15984.3(140119312:140146791);MSTRG.15984.4(140119312:140146762);MSTRG.15984.5(140119312:140146723);MSTRG.15984.6(140119312:140146723);MSTRG.15984.7(140119312:140143646);MSTRG.15984.8(140119312:140146714);Zm00001d026162_T001(140119312:140119716);Zm00001d026163_T001(140143158:140146714);Zm00001d026163_T002(140145949:1401468…
10	140376148	140376148	-	140376148	intergenic	MSTRG.16002	140376093-140378519	MSTRG.16002.1(140376093:140378229);MSTRG.16002.2(140376225:140378229);MSTRG.16002.3(140377183:140378519)
10	140376804	140376804	-	140376804	intergenic	MSTRG.16002	140376093-140378519	MSTRG.16002.1(140376093:140378229);MSTRG.16002.2(140376225:140378229);MSTRG.16002.3(140377183:140378519)
10	140660586	140660586	-	140660586	intergenic	MSTRG.16019	140584988-140680627	MSTRG.16019.1(140584988:140680627)
10	140661037	140661037	-	140661037	intergenic	MSTRG.16019;MSTRG.16021	140584988-140680627;140660891-140663275	MSTRG.16019.1(140584988:140680627);MSTRG.16021.1(140660891:140663275)
10	140895502	140895502	-	140895502	intergenic	MSTRG.16035;MSTRG.16039	140869530-140926947;140895354-140899119	MSTRG.16035.1(140869530:140926947);MSTRG.16035.2(140869750:140874174);MSTRG.16035.3(140869750:140874150);MSTRG.16035.4(140869750:140874174);MSTRG.16035.5(140869750:140874137);Zm00001d026203_T001(140869750:140871173);MSTRG.16035.7(140872496:140874174);Zm00001d026204_T001(140872548:140874240);MSTRG.16035.9(140872573:140874128);MSTRG.16039.1(140895354:140899119);MSTRG.16039.2(140895538:140899119);MS…
10	141571301	141571301	-	141571301	intergenic	MSTRG.16066	141571203-141573965	MSTRG.16066.1(141571203:141573773);MSTRG.16066.2(141571203:141573773);MSTRG.16066.3(141571306:141573965);MSTRG.16066.4(141571306:141573743);MSTRG.16066.5(141571412:141572487)
10	141573031	141573031	-	141573031	intergenic	MSTRG.16066	141571203-141573965	MSTRG.16066.1(141571203:141573773);MSTRG.16066.2(141571203:141573773);MSTRG.16066.3(141571306:141573965);MSTRG.16066.4(141571306:141573743);MSTRG.16066.5(141571412:141572487)
10	142263916	142263938	-	142263933	intergenic	MSTRG.16112	142263792-142269640	MSTRG.16112.1(142263792:142269640);Zm00001d026259_T001(142269137:142269586)
10	142263969	142264040	-	142264038	intergenic	MSTRG.16112	142263792-142269640	MSTRG.16112.1(142263792:142269640);Zm00001d026259_T001(142269137:142269586)
10	142264075	142264083	-	142264078	intergenic	MSTRG.16112	142263792-142269640	MSTRG.16112.1(142263792:142269640);Zm00001d026259_T001(142269137:142269586)
10	142265241	142265241	-	142265241	intergenic	MSTRG.16112	142263792-142269640	MSTRG.16112.1(142263792:142269640);Zm00001d026259_T001(142269137:142269586)
10	142341668	142341688	-	142341682	intergenic	MSTRG.16120	142341598-142343486	MSTRG.16120.1(142341598:142343447);MSTRG.16120.2(142341634:142343486)
10	142341725	142341766	-	142341750	intergenic	MSTRG.16120	142341598-142343486	MSTRG.16120.1(142341598:142343447);MSTRG.16120.2(142341634:142343486)
10	142341803	142341806	-	142341806	intergenic	MSTRG.16120	142341598-142343486	MSTRG.16120.1(142341598:142343447);MSTRG.16120.2(142341634:142343486)
10	142429630	142429630	-	142429630	intergenic	MSTRG.16128	142376205-142477196	MSTRG.16128.1(142376205:142419607);MSTRG.16128.2(142376205:142477196);MSTRG.16128.3(142376205:142380216);Zm00001d026267_T002(142376205:142380294);Zm00001d026267_T001(142376205:142379612);MSTRG.16128.6(142376481:142380276)
10	142437027	142437029	-	142437029	intergenic	MSTRG.16128	142376205-142477196	MSTRG.16128.1(142376205:142419607);MSTRG.16128.2(142376205:142477196);MSTRG.16128.3(142376205:142380216);Zm00001d026267_T002(142376205:142380294);Zm00001d026267_T001(142376205:142379612);MSTRG.16128.6(142376481:142380276)
10	143390663	143390687	-	143390687	intergenic	MSTRG.16218	143369710-143425101	Zm00001d026312_T002(143369710:143373664);Zm00001d026312_T001(143369710:143373531);Zm00001d026312_T003(143369710:143373664);Zm00001d026312_T004(143369803:143373531);Zm00001d026312_T005(143369829:143373532);MSTRG.16218.6(143369883:143425101);MSTRG.16218.7(143369883:143392339);Zm00001d026312_T006(143369883:143373427);Zm00001d026312_T007(143369883:143373578)
10	143390721	143390735	-	143390734	intergenic	MSTRG.16218	143369710-143425101	Zm00001d026312_T002(143369710:143373664);Zm00001d026312_T001(143369710:143373531);Zm00001d026312_T003(143369710:143373664);Zm00001d026312_T004(143369803:143373531);Zm00001d026312_T005(143369829:143373532);MSTRG.16218.6(143369883:143425101);MSTRG.16218.7(143369883:143392339);Zm00001d026312_T006(143369883:143373427);Zm00001d026312_T007(143369883:143373578)
10	144193434	144193434	-	144193434	intergenic	MSTRG.16288	144193223-144197480	MSTRG.16288.1(144193223:144197437);MSTRG.16288.2(144193235:144197446);MSTRG.16288.3(144193327:144197413);MSTRG.16288.4(144193333:144197302);MSTRG.16288.5(144193412:144197307);Zm00001d026358_T001(144194271:144197375);Zm00001d026358_T002(144194271:144197480);Zm00001d026358_T003(144196433:144197446)
10	144193576	144193576	-	144193576	intergenic	MSTRG.16288	144193223-144197480	MSTRG.16288.1(144193223:144197437);MSTRG.16288.2(144193235:144197446);MSTRG.16288.3(144193327:144197413);MSTRG.16288.4(144193333:144197302);MSTRG.16288.5(144193412:144197307);Zm00001d026358_T001(144194271:144197375);Zm00001d026358_T002(144194271:144197480);Zm00001d026358_T003(144196433:144197446)
10	144193611	144193611	-	144193611	intergenic	MSTRG.16288	144193223-144197480	MSTRG.16288.1(144193223:144197437);MSTRG.16288.2(144193235:144197446);MSTRG.16288.3(144193327:144197413);MSTRG.16288.4(144193333:144197302);MSTRG.16288.5(144193412:144197307);Zm00001d026358_T001(144194271:144197375);Zm00001d026358_T002(144194271:144197480);Zm00001d026358_T003(144196433:144197446)
10	144193763	144193768	-	144193763	intergenic	MSTRG.16288	144193223-144197480	MSTRG.16288.1(144193223:144197437);MSTRG.16288.2(144193235:144197446);MSTRG.16288.3(144193327:144197413);MSTRG.16288.4(144193333:144197302);MSTRG.16288.5(144193412:144197307);Zm00001d026358_T001(144194271:144197375);Zm00001d026358_T002(144194271:144197480);Zm00001d026358_T003(144196433:144197446)
10	144987803	144987809	-	144987803	intergenic	MSTRG.16353	144948565-144991346	MSTRG.16353.1(144948565:144991346);Zm00001d026390_T001(144990951:144991196)
10	144989722	144989722	-	144989722	intergenic	MSTRG.16353;MSTRG.16354	144948565-144991346;144989663-144990271	MSTRG.16353.1(144948565:144991346);Zm00001d026390_T001(144990951:144991196);MSTRG.16354.1(144989663:144990271)
10	145152191	145152213	-	145152191	intergenic	MSTRG.16369	145151998-145158895	MSTRG.16369.1(145151998:145158895);MSTRG.16369.2(145152067:145158895);MSTRG.16369.3(145155875:145158868);Zm00001d026397_T001(145157330:145158895)
10	145152240	145152258	-	145152244	intergenic	MSTRG.16369	145151998-145158895	MSTRG.16369.1(145151998:145158895);MSTRG.16369.2(145152067:145158895);MSTRG.16369.3(145155875:145158868);Zm00001d026397_T001(145157330:145158895)
10	145153987	145153987	-	145153987	intergenic	MSTRG.16369	145151998-145158895	MSTRG.16369.1(145151998:145158895);MSTRG.16369.2(145152067:145158895);MSTRG.16369.3(145155875:145158868);Zm00001d026397_T001(145157330:145158895)
10	145154062	145154062	-	145154062	intergenic	MSTRG.16369	145151998-145158895	MSTRG.16369.1(145151998:145158895);MSTRG.16369.2(145152067:145158895);MSTRG.16369.3(145155875:145158868);Zm00001d026397_T001(145157330:145158895)
10	145155649	145155664	-	145155649	intergenic	MSTRG.16369	145151998-145158895	MSTRG.16369.1(145151998:145158895);MSTRG.16369.2(145152067:145158895);MSTRG.16369.3(145155875:145158868);Zm00001d026397_T001(145157330:145158895)
10	145156083	145156083	-	145156083	intergenic	MSTRG.16369	145151998-145158895	MSTRG.16369.1(145151998:145158895);MSTRG.16369.2(145152067:145158895);MSTRG.16369.3(145155875:145158868);Zm00001d026397_T001(145157330:145158895)
10	145156458	145156458	-	145156458	intergenic	MSTRG.16369	145151998-145158895	MSTRG.16369.1(145151998:145158895);MSTRG.16369.2(145152067:145158895);MSTRG.16369.3(145155875:145158868);Zm00001d026397_T001(145157330:145158895)
10	145156546	145156561	-	145156546	intergenic	MSTRG.16369	145151998-145158895	MSTRG.16369.1(145151998:145158895);MSTRG.16369.2(145152067:145158895);MSTRG.16369.3(145155875:145158868);Zm00001d026397_T001(145157330:145158895)
10	145156646	145156646	-	145156646	intergenic	MSTRG.16369	145151998-145158895	MSTRG.16369.1(145151998:145158895);MSTRG.16369.2(145152067:145158895);MSTRG.16369.3(145155875:145158868);Zm00001d026397_T001(145157330:145158895)
10	145156721	145156797	-	145156797	intergenic	MSTRG.16369	145151998-145158895	MSTRG.16369.1(145151998:145158895);MSTRG.16369.2(145152067:145158895);MSTRG.16369.3(145155875:145158868);Zm00001d026397_T001(145157330:145158895)
10	145462875	145462875	-	145462875	intergenic	MSTRG.16388;MSTRG.16389	145378107-145474670;145379087-145463671	MSTRG.16388.1(145378107:145474670);MSTRG.16389.1(145379087:145463671)
10	145462989	145463030	-	145463008	intergenic	MSTRG.16388;MSTRG.16389	145378107-145474670;145379087-145463671	MSTRG.16388.1(145378107:145474670);MSTRG.16389.1(145379087:145463671)
10	145564524	145564524	-	145564524	intergenic	MSTRG.16408	145564050-145565852	MSTRG.16408.1(145564050:145565852);MSTRG.16408.2(145564240:145565852)
10	145564747	145564747	-	145564747	intergenic	MSTRG.16408	145564050-145565852	MSTRG.16408.1(145564050:145565852);MSTRG.16408.2(145564240:145565852)
10	145982832	145982867	-	145982860	intergenic	MSTRG.16444	145982476-145983982	MSTRG.16444.1(145982476:145983982);MSTRG.16444.2(145982630:145983982);MSTRG.16444.3(145982829:145983982);MSTRG.16444.4(145982863:145983982);MSTRG.16444.5(145982951:145983982);Zm00001d026447_T001(145983350:145983982)
10	146146851	146146851	-	146146851	intergenic	MSTRG.16458	146146501-146147266	MSTRG.16458.1(146146501:146147266)
10	146465855	146465860	-	146465855	intergenic	MSTRG.16482	146463471-146468597	MSTRG.16482.1(146463471:146468597);MSTRG.16482.2(146465739:146468439);MSTRG.16482.3(146466061:146468327);MSTRG.16482.4(146466306:146468407)
10	146465893	146465897	-	146465897	intergenic	MSTRG.16482	146463471-146468597	MSTRG.16482.1(146463471:146468597);MSTRG.16482.2(146465739:146468439);MSTRG.16482.3(146466061:146468327);MSTRG.16482.4(146466306:146468407)
10	146465958	146465958	-	146465958	intergenic	MSTRG.16482	146463471-146468597	MSTRG.16482.1(146463471:146468597);MSTRG.16482.2(146465739:146468439);MSTRG.16482.3(146466061:146468327);MSTRG.16482.4(146466306:146468407)
10	147114841	147114841	-	147114841	intergenic	MSTRG.16525	147114756-147175639	MSTRG.16525.1(147114756:147175639);Zm00001d026495_T001(147115022:147116956);Zm00001d026495_T002(147115029:147116876)
10	147195544	147195544	-	147195544	intergenic	MSTRG.16529	147195504-147196015	MSTRG.16529.1(147195504:147196015)
10	147466069	147466069	-	147466069	intergenic	MSTRG.16561	147462770-147469056	Zm00001d026516_T001(147462770:147465833);MSTRG.16561.2(147462789:147469056);MSTRG.16561.3(147462789:147469056);MSTRG.16561.4(147462789:147469046);MSTRG.16561.5(147462796:147469029);MSTRG.16561.6(147462810:147469028);Zm00001d026516_T002(147462906:147465833)
10	147739961	147739984	-	147739982	intergenic	MSTRG.16577	147739814-147740680	MSTRG.16577.1(147739814:147740680)
10	147740040	147740092	-	147740077	intergenic	MSTRG.16577	147739814-147740680	MSTRG.16577.1(147739814:147740680)
10	147742709	147742718	-	147742718	intergenic	MSTRG.16579	147742695-147804738	MSTRG.16579.1(147742695:147804547);Zm00001d026530_T001(147743187:147743636);MSTRG.16579.3(147796680:147804738);MSTRG.16579.4(147796973:147799478)
10	147803722	147803722	-	147803722	intergenic	MSTRG.16579	147742695-147804738	MSTRG.16579.1(147742695:147804547);Zm00001d026530_T001(147743187:147743636);MSTRG.16579.3(147796680:147804738);MSTRG.16579.4(147796973:147799478)
10	148509444	148509459	-	148509459	intergenic	MSTRG.16673	148412856-148511293	Zm00001d026588_T001(148412856:148415275);Zm00001d026588_T002(148412864:148415345);Zm00001d026588_T004(148412864:148415405);Zm00001d026588_T003(148412864:148415405);Zm00001d026588_T005(148412892:148415405);Zm00001d026588_T006(148412896:148415331);Zm00001d026588_T007(148412932:148415358);MSTRG.16673.8(148412933:148415275);Zm00001d026588_T008(148412933:148415333);MSTRG.16673.10(148413198:148511287);…
10	148631791	148631791	-	148631791	intergenic	MSTRG.16681	148631783-148636016	MSTRG.16681.1(148631783:148636016);MSTRG.16681.2(148631853:148635817);Zm00001d026592_T001(148633857:148636016)
10	148631839	148631854	-	148631839	intergenic	MSTRG.16681	148631783-148636016	MSTRG.16681.1(148631783:148636016);MSTRG.16681.2(148631853:148635817);Zm00001d026592_T001(148633857:148636016)
10	148631919	148631919	-	148631919	intergenic	MSTRG.16681	148631783-148636016	MSTRG.16681.1(148631783:148636016);MSTRG.16681.2(148631853:148635817);Zm00001d026592_T001(148633857:148636016)
10	148631950	148631978	-	148631950	intergenic	MSTRG.16681	148631783-148636016	MSTRG.16681.1(148631783:148636016);MSTRG.16681.2(148631853:148635817);Zm00001d026592_T001(148633857:148636016)
10	148632017	148632043	-	148632017	intergenic	MSTRG.16681	148631783-148636016	MSTRG.16681.1(148631783:148636016);MSTRG.16681.2(148631853:148635817);Zm00001d026592_T001(148633857:148636016)
10	148914347	148914347	-	148914347	intergenic	MSTRG.16712	148913445-148914382	MSTRG.16712.1(148913445:148914382)
10	149268194	149268211	-	149268211	intergenic	MSTRG.16741;MSTRG.16758	149192593-149272597;149268158-149271866	MSTRG.16741.1(149192593:149272597);MSTRG.16741.2(149192593:149193680);MSTRG.16741.3(149192593:149193680);Zm00001d026632_T001(149192883:149193680);MSTRG.16758.1(149268158:149271866);MSTRG.16758.2(149268241:149271748);MSTRG.16758.3(149268286:149271820);Zm00001d026640_T001(149269862:149271718)
10	149268242	149268256	-	149268242	intergenic	MSTRG.16741;MSTRG.16758	149192593-149272597;149268158-149271866	MSTRG.16741.1(149192593:149272597);MSTRG.16741.2(149192593:149193680);MSTRG.16741.3(149192593:149193680);Zm00001d026632_T001(149192883:149193680);MSTRG.16758.1(149268158:149271866);MSTRG.16758.2(149268241:149271748);MSTRG.16758.3(149268286:149271820);Zm00001d026640_T001(149269862:149271718)
10	149268318	149268373	-	149268357	intergenic	MSTRG.16741;MSTRG.16758	149192593-149272597;149268158-149271866	MSTRG.16741.1(149192593:149272597);MSTRG.16741.2(149192593:149193680);MSTRG.16741.3(149192593:149193680);Zm00001d026632_T001(149192883:149193680);MSTRG.16758.1(149268158:149271866);MSTRG.16758.2(149268241:149271748);MSTRG.16758.3(149268286:149271820);Zm00001d026640_T001(149269862:149271718)
10	149268404	149268425	-	149268408	intergenic	MSTRG.16741;MSTRG.16758	149192593-149272597;149268158-149271866	MSTRG.16741.1(149192593:149272597);MSTRG.16741.2(149192593:149193680);MSTRG.16741.3(149192593:149193680);Zm00001d026632_T001(149192883:149193680);MSTRG.16758.1(149268158:149271866);MSTRG.16758.2(149268241:149271748);MSTRG.16758.3(149268286:149271820);Zm00001d026640_T001(149269862:149271718)
10	149268466	149268543	-	149268509	intergenic	MSTRG.16741;MSTRG.16758	149192593-149272597;149268158-149271866	MSTRG.16741.1(149192593:149272597);MSTRG.16741.2(149192593:149193680);MSTRG.16741.3(149192593:149193680);Zm00001d026632_T001(149192883:149193680);MSTRG.16758.1(149268158:149271866);MSTRG.16758.2(149268241:149271748);MSTRG.16758.3(149268286:149271820);Zm00001d026640_T001(149269862:149271718)
10	149268568	149268568	-	149268568	intergenic	MSTRG.16741;MSTRG.16758	149192593-149272597;149268158-149271866	MSTRG.16741.1(149192593:149272597);MSTRG.16741.2(149192593:149193680);MSTRG.16741.3(149192593:149193680);Zm00001d026632_T001(149192883:149193680);MSTRG.16758.1(149268158:149271866);MSTRG.16758.2(149268241:149271748);MSTRG.16758.3(149268286:149271820);Zm00001d026640_T001(149269862:149271718)
10	149382012	149382012	-	149382012	intergenic	MSTRG.16778	149381962-149412385	MSTRG.16778.1(149381962:149412385);MSTRG.16778.2(149382212:149384169);Zm00001d026649_T001(149382212:149384169);Zm00001d026649_T002(149382213:149383768)
10	149385184	149385217	-	149385184	intergenic	MSTRG.16778	149381962-149412385	MSTRG.16778.1(149381962:149412385);MSTRG.16778.2(149382212:149384169);Zm00001d026649_T001(149382212:149384169);Zm00001d026649_T002(149382213:149383768)
10	149385278	149385286	-	149385286	intergenic	MSTRG.16778	149381962-149412385	MSTRG.16778.1(149381962:149412385);MSTRG.16778.2(149382212:149384169);Zm00001d026649_T001(149382212:149384169);Zm00001d026649_T002(149382213:149383768)
10	149386205	149386205	-	149386205	intergenic	MSTRG.16778	149381962-149412385	MSTRG.16778.1(149381962:149412385);MSTRG.16778.2(149382212:149384169);Zm00001d026649_T001(149382212:149384169);Zm00001d026649_T002(149382213:149383768)
10	149632259	149632275	-	149632259	intergenic	MSTRG.16807	149632211-149642614	MSTRG.16807.1(149632211:149642614)
10	149632300	149632320	-	149632315	intergenic	MSTRG.16807	149632211-149642614	MSTRG.16807.1(149632211:149642614)
10	149632355	149632355	-	149632355	intergenic	MSTRG.16807	149632211-149642614	MSTRG.16807.1(149632211:149642614)
10	149632381	149632451	-	149632441	intergenic	MSTRG.16807	149632211-149642614	MSTRG.16807.1(149632211:149642614)
10	149632482	149632484	-	149632482	intergenic	MSTRG.16807	149632211-149642614	MSTRG.16807.1(149632211:149642614)
10	149632550	149632550	-	149632550	intergenic	MSTRG.16807	149632211-149642614	MSTRG.16807.1(149632211:149642614)
10	149633275	149633275	-	149633275	intergenic	MSTRG.16807	149632211-149642614	MSTRG.16807.1(149632211:149642614)
10	149633305	149633328	-	149633328	intergenic	MSTRG.16807	149632211-149642614	MSTRG.16807.1(149632211:149642614)
10	149634306	149634306	-	149634306	intergenic	MSTRG.16807	149632211-149642614	MSTRG.16807.1(149632211:149642614)
10	149641238	149641298	-	149641238	intergenic	MSTRG.16807	149632211-149642614	MSTRG.16807.1(149632211:149642614)
10	149641370	149641370	-	149641370	intergenic	MSTRG.16807	149632211-149642614	MSTRG.16807.1(149632211:149642614)
10	149641420	149641420	-	149641420	intergenic	MSTRG.16807	149632211-149642614	MSTRG.16807.1(149632211:149642614)
10	149641510	149641510	-	149641510	intergenic	MSTRG.16807	149632211-149642614	MSTRG.16807.1(149632211:149642614)
10	149857545	149857545	-	149857545	intergenic	MSTRG.16831	149857538-149858949	MSTRG.16831.1(149857538:149858949)
10	150020351	150020351	-	150020351	intergenic	MSTRG.16835	150010817-150051768	MSTRG.16835.1(150010817:150051706);MSTRG.16835.2(150050425:150051768)
10	150356096	150356117	-	150356096	intergenic	MSTRG.16856	150356023-150357969	MSTRG.16856.1(150356023:150357844);MSTRG.16856.2(150356101:150357969);Zm00001d026701_T001(150356284:150357965);MSTRG.16856.4(150356332:150357854)
10	150488518	150488518	-	150488518	intergenic	MSTRG.16858	150472430-150490740	MSTRG.16858.1(150472430:150490740);MSTRG.16858.2(150488435:150490618)
10	2365771	2365771	+	2365771	intergenic	MSTRG.12004	2361652-2365984	MSTRG.12004.1(2361652:2365984);MSTRG.12004.2(2361652:2365412);Zm00001d023300_T001(2361652:2365412);Zm00001d023300_T003(2361841:2365420);Zm00001d023300_T002(2361841:2365420);MSTRG.12004.6(2362215:2365412)
10	2365839	2365867	+	2365839	intergenic	MSTRG.12004	2361652-2365984	MSTRG.12004.1(2361652:2365984);MSTRG.12004.2(2361652:2365412);Zm00001d023300_T001(2361652:2365412);Zm00001d023300_T003(2361841:2365420);Zm00001d023300_T002(2361841:2365420);MSTRG.12004.6(2362215:2365412)
10	2365925	2365943	+	2365943	intergenic	MSTRG.12004	2361652-2365984	MSTRG.12004.1(2361652:2365984);MSTRG.12004.2(2361652:2365412);Zm00001d023300_T001(2361652:2365412);Zm00001d023300_T003(2361841:2365420);Zm00001d023300_T002(2361841:2365420);MSTRG.12004.6(2362215:2365412)
10	2365969	2365969	+	2365969	intergenic	MSTRG.12004	2361652-2365984	MSTRG.12004.1(2361652:2365984);MSTRG.12004.2(2361652:2365412);Zm00001d023300_T001(2361652:2365412);Zm00001d023300_T003(2361841:2365420);Zm00001d023300_T002(2361841:2365420);MSTRG.12004.6(2362215:2365412)
10	2568574	2568604	+	2568590	intergenic	MSTRG.12012	2558908-2568726	Zm00001d023304_T001(2558908:2563119);MSTRG.12012.2(2558930:2568726);Zm00001d023304_T002(2558930:2563889);Zm00001d023304_T003(2558969:2563889);Zm00001d023304_T004(2559349:2562953);Zm00001d023304_T006(2559418:2563119);MSTRG.12012.7(2559472:2568634);MSTRG.12012.8(2559472:2568598);Zm00001d023304_T007(2559472:2563119);Zm00001d023304_T008(2559510:2562940);Zm00001d023304_T009(2559516:2562940);Zm00001d02…
10	2772869	2772897	+	2772897	intergenic	MSTRG.12025	2743351-2797732	MSTRG.12025.1(2743351:2754154);MSTRG.12025.2(2743357:2754154);MSTRG.12025.3(2743366:2754155);Zm00001d023311_T001(2743366:2754357);MSTRG.12025.5(2743367:2797732);MSTRG.12025.6(2743378:2754154);MSTRG.12025.7(2743386:2754154);MSTRG.12025.8(2743408:2754238);MSTRG.12025.9(2743441:2754154);Zm00001d023311_T002(2744177:2754332);Zm00001d023311_T005(2744202:2754155);Zm00001d023311_T007(2744311:2754357);Zm0…
10	2791230	2791230	+	2791230	intergenic	MSTRG.12025;MSTRG.12039	2743351-2797732;2790689-2791370	MSTRG.12025.1(2743351:2754154);MSTRG.12025.2(2743357:2754154);MSTRG.12025.3(2743366:2754155);Zm00001d023311_T001(2743366:2754357);MSTRG.12025.5(2743367:2797732);MSTRG.12025.6(2743378:2754154);MSTRG.12025.7(2743386:2754154);MSTRG.12025.8(2743408:2754238);MSTRG.12025.9(2743441:2754154);Zm00001d023311_T002(2744177:2754332);Zm00001d023311_T005(2744202:2754155);Zm00001d023311_T007(2744311:2754357);Zm0…
10	4191935	4191935	+	4191935	intergenic	MSTRG.12132	4190853-4193310	MSTRG.12132.1(4190853:4193310)
10	5182520	5182520	+	5182520	intergenic	MSTRG.12198	5173945-5220520	MSTRG.12198.1(5173945:5220520)
10	5238878	5238878	+	5238878	intergenic	MSTRG.12200	5234851-5239156	MSTRG.12200.1(5234851:5238288);MSTRG.12200.2(5234905:5238288);MSTRG.12200.3(5234922:5238976);MSTRG.12200.4(5234948:5238288);MSTRG.12200.5(5235583:5238985);MSTRG.12200.6(5235583:5239156);Zm00001d023425_T001(5235583:5238288)
10	5239043	5239043	+	5239043	intergenic	MSTRG.12200	5234851-5239156	MSTRG.12200.1(5234851:5238288);MSTRG.12200.2(5234905:5238288);MSTRG.12200.3(5234922:5238976);MSTRG.12200.4(5234948:5238288);MSTRG.12200.5(5235583:5238985);MSTRG.12200.6(5235583:5239156);Zm00001d023425_T001(5235583:5238288)
10	6041412	6041412	+	6041412	intergenic	MSTRG.12240	6037075-6122261	MSTRG.12240.1(6037075:6122261);MSTRG.12240.2(6037075:6058051)
10	6912523	6912529	+	6912529	intergenic	MSTRG.12276	6910663-6913020	MSTRG.12276.1(6910663:6913020)
10	7355040	7355053	+	7355040	intergenic	MSTRG.12294	7347502-7355171	Zm00001d023495_T001(7347502:7354331);MSTRG.12294.2(7350287:7355170);MSTRG.12294.3(7350287:7355171);MSTRG.12294.4(7350302:7355111);MSTRG.12294.5(7350320:7355125);MSTRG.12294.6(7350362:7355171);MSTRG.12294.7(7350401:7355171);MSTRG.12294.8(7350457:7355166);MSTRG.12294.9(7352360:7353260)
10	7355136	7355136	+	7355136	intergenic	MSTRG.12294	7347502-7355171	Zm00001d023495_T001(7347502:7354331);MSTRG.12294.2(7350287:7355170);MSTRG.12294.3(7350287:7355171);MSTRG.12294.4(7350302:7355111);MSTRG.12294.5(7350320:7355125);MSTRG.12294.6(7350362:7355171);MSTRG.12294.7(7350401:7355171);MSTRG.12294.8(7350457:7355166);MSTRG.12294.9(7352360:7353260)
10	8211405	8211416	+	8211413	intergenic	MSTRG.12317	8205556-8211552	MSTRG.12317.1(8205556:8207920);MSTRG.12317.2(8205562:8211552);Zm00001d023511_T001(8205715:8210084)
10	8782418	8782418	+	8782418	intergenic	MSTRG.12348	8781322-8839973	MSTRG.12348.1(8781322:8829018);MSTRG.12348.2(8781371:8782790);MSTRG.12348.3(8781391:8782862);MSTRG.12348.4(8781429:8839973);MSTRG.12348.5(8781439:8800492)
10	10008532	10008550	+	10008550	intergenic	MSTRG.12384	10007646-10009305	MSTRG.12384.1(10007646:10009305)
10	10009168	10009188	+	10009168	intergenic	MSTRG.12384	10007646-10009305	MSTRG.12384.1(10007646:10009305)
10	10009292	10009298	+	10009292	intergenic	MSTRG.12384	10007646-10009305	MSTRG.12384.1(10007646:10009305)
10	10165823	10165823	+	10165823	intergenic	MSTRG.12391	10165155-10166491	MSTRG.12391.1(10165155:10166491)
10	12529976	12529992	+	12529985	intergenic	MSTRG.12475	12528306-12530069	MSTRG.12475.1(12528306:12530069)
10	12530057	12530057	+	12530057	intergenic	MSTRG.12475	12528306-12530069	MSTRG.12475.1(12528306:12530069)
10	22672255	22672255	+	22672255	intergenic	MSTRG.12723	22668293-22675332	MSTRG.12723.1(22668293:22675332);MSTRG.12723.2(22669327:22674823)
10	23863670	23863670	+	23863670	intergenic	MSTRG.12750	23860615-23864094	MSTRG.12750.1(23860615:23864094);MSTRG.12750.2(23860615:23864094);Zm00001d023836_T001(23860615:23861514)
10	23863743	23863743	+	23863743	intergenic	MSTRG.12750	23860615-23864094	MSTRG.12750.1(23860615:23864094);MSTRG.12750.2(23860615:23864094);Zm00001d023836_T001(23860615:23861514)
10	23863876	23863896	+	23863882	intergenic	MSTRG.12750	23860615-23864094	MSTRG.12750.1(23860615:23864094);MSTRG.12750.2(23860615:23864094);Zm00001d023836_T001(23860615:23861514)
10	23863938	23863938	+	23863938	intergenic	MSTRG.12750	23860615-23864094	MSTRG.12750.1(23860615:23864094);MSTRG.12750.2(23860615:23864094);Zm00001d023836_T001(23860615:23861514)
10	26078425	26078425	+	26078425	intergenic	MSTRG.12809	26000298-26078504	MSTRG.12809.1(26000298:26078504);Zm00001d023877_T001(26072811:26076587)
10	27122102	27122102	+	27122102	intergenic	MSTRG.12834	27121716-27122649	MSTRG.12834.1(27121716:27122649)
10	42486076	42486076	+	42486076	intergenic	MSTRG.13068	42484899-42494244	MSTRG.13068.1(42484899:42494244);Zm00001d024082_T001(42493160:42494244)
10	44089828	44089828	+	44089828	intergenic	MSTRG.13082	44089503-44092618	MSTRG.13082.1(44089503:44092618)
10	44092193	44092210	+	44092193	intergenic	MSTRG.13082	44089503-44092618	MSTRG.13082.1(44089503:44092618)
10	52663024	52663024	+	52663024	intergenic	MSTRG.13196	52662566-52669633	MSTRG.13196.1(52662566:52669633)
10	55751313	55751314	+	55751314	intergenic	MSTRG.13235	55739987-55751547	Zm00001d024203_T001(55739987:55744441);Zm00001d024203_T002(55740023:55744458);MSTRG.13235.3(55740053:55751545);MSTRG.13235.4(55740073:55751547)
10	55751479	55751481	+	55751481	intergenic	MSTRG.13235	55739987-55751547	Zm00001d024203_T001(55739987:55744441);Zm00001d024203_T002(55740023:55744458);MSTRG.13235.3(55740053:55751545);MSTRG.13235.4(55740073:55751547)
10	55983621	55983621	+	55983621	intergenic	MSTRG.13239	55977849-55984103	MSTRG.13239.1(55977849:55984103);MSTRG.13239.2(55977849:55984085);MSTRG.13239.3(55977859:55984103)
10	55983745	55983774	+	55983759	intergenic	MSTRG.13239	55977849-55984103	MSTRG.13239.1(55977849:55984103);MSTRG.13239.2(55977849:55984085);MSTRG.13239.3(55977859:55984103)
10	55983892	55983911	+	55983905	intergenic	MSTRG.13239	55977849-55984103	MSTRG.13239.1(55977849:55984103);MSTRG.13239.2(55977849:55984085);MSTRG.13239.3(55977859:55984103)
10	55983960	55983960	+	55983960	intergenic	MSTRG.13239	55977849-55984103	MSTRG.13239.1(55977849:55984103);MSTRG.13239.2(55977849:55984085);MSTRG.13239.3(55977859:55984103)
10	55983986	55984008	+	55983996	intergenic	MSTRG.13239	55977849-55984103	MSTRG.13239.1(55977849:55984103);MSTRG.13239.2(55977849:55984085);MSTRG.13239.3(55977859:55984103)
10	55984035	55984080	+	55984038	intergenic	MSTRG.13239	55977849-55984103	MSTRG.13239.1(55977849:55984103);MSTRG.13239.2(55977849:55984085);MSTRG.13239.3(55977859:55984103)
10	56275916	56275916	+	56275916	intergenic	MSTRG.13243	56256482-56310854	MSTRG.13243.1(56256482:56275679);MSTRG.13243.2(56256581:56275679);MSTRG.13243.3(56256582:56275679);MSTRG.13243.4(56256599:56275679);MSTRG.13243.5(56256611:56275679);MSTRG.13243.6(56256621:56275679);MSTRG.13243.7(56256636:56275679);MSTRG.13243.8(56256684:56310854);Zm00001d024205_T002(56256752:56275757);Zm00001d024205_T001(56256752:56275757);Zm00001d024205_T003(56268747:56275679)
10	59002091	59002091	+	59002091	intergenic	MSTRG.13281	59001551-59005171	MSTRG.13281.1(59001551:59004767);Zm00001d024239_T001(59002720:59004799);Zm00001d024239_T002(59002720:59005171)
10	59002253	59002262	+	59002253	intergenic	MSTRG.13281	59001551-59005171	MSTRG.13281.1(59001551:59004767);Zm00001d024239_T001(59002720:59004799);Zm00001d024239_T002(59002720:59005171)
10	59002318	59002326	+	59002318	intergenic	MSTRG.13281	59001551-59005171	MSTRG.13281.1(59001551:59004767);Zm00001d024239_T001(59002720:59004799);Zm00001d024239_T002(59002720:59005171)
10	59239753	59239839	+	59239805	intergenic	MSTRG.13287	59229098-59240086	MSTRG.13287.1(59229098:59240086);MSTRG.13287.2(59229280:59239995);MSTRG.13287.3(59229280:59239970);MSTRG.13287.4(59229280:59239969);MSTRG.13287.5(59229280:59239968);MSTRG.13287.6(59229280:59239968);Zm00001d024242_T001(59229280:59230089)
10	59239866	59239972	+	59239968	intergenic	MSTRG.13287	59229098-59240086	MSTRG.13287.1(59229098:59240086);MSTRG.13287.2(59229280:59239995);MSTRG.13287.3(59229280:59239970);MSTRG.13287.4(59229280:59239969);MSTRG.13287.5(59229280:59239968);MSTRG.13287.6(59229280:59239968);Zm00001d024242_T001(59229280:59230089)
10	62022801	62022801	+	62022801	intergenic	MSTRG.13340	62020002-62022802	MSTRG.13340.1(62020002:62022802)
10	62686932	62686965	+	62686961	intergenic	MSTRG.13350	62684243-62688233	MSTRG.13350.1(62684243:62688233);MSTRG.13350.2(62684243:62688100);MSTRG.13350.3(62684243:62688100);Zm00001d024298_T001(62684243:62685430)
10	62687842	62687842	+	62687842	intergenic	MSTRG.13350	62684243-62688233	MSTRG.13350.1(62684243:62688233);MSTRG.13350.2(62684243:62688100);MSTRG.13350.3(62684243:62688100);Zm00001d024298_T001(62684243:62685430)
10	62688064	62688082	+	62688064	intergenic	MSTRG.13350	62684243-62688233	MSTRG.13350.1(62684243:62688233);MSTRG.13350.2(62684243:62688100);MSTRG.13350.3(62684243:62688100);Zm00001d024298_T001(62684243:62685430)
10	63063831	63063831	+	63063831	intergenic	MSTRG.13358	62996709-63063997	MSTRG.13358.1(62996709:63063795);Zm00001d024305_T001(63044232:63050120);MSTRG.13358.3(63044267:63063997);MSTRG.13358.4(63044425:63063780);Zm00001d024306_T001(63061548:63063353)
10	63063856	63063869	+	63063864	intergenic	MSTRG.13358	62996709-63063997	MSTRG.13358.1(62996709:63063795);Zm00001d024305_T001(63044232:63050120);MSTRG.13358.3(63044267:63063997);MSTRG.13358.4(63044425:63063780);Zm00001d024306_T001(63061548:63063353)
10	63063899	63063899	+	63063899	intergenic	MSTRG.13358	62996709-63063997	MSTRG.13358.1(62996709:63063795);Zm00001d024305_T001(63044232:63050120);MSTRG.13358.3(63044267:63063997);MSTRG.13358.4(63044425:63063780);Zm00001d024306_T001(63061548:63063353)
10	65393796	65393796	+	65393796	intergenic	MSTRG.13410	65391413-65393850	MSTRG.13410.1(65391413:65393850)
10	66584295	66584300	+	66584295	intergenic	MSTRG.13430	66571318-66585380	MSTRG.13430.1(66571318:66585380);Zm00001d024357_T001(66571406:66571900)
10	66584369	66584369	+	66584369	intergenic	MSTRG.13430	66571318-66585380	MSTRG.13430.1(66571318:66585380);Zm00001d024357_T001(66571406:66571900)
10	66584930	66584967	+	66584934	intergenic	MSTRG.13430	66571318-66585380	MSTRG.13430.1(66571318:66585380);Zm00001d024357_T001(66571406:66571900)
10	66585004	66585034	+	66585004	intergenic	MSTRG.13430	66571318-66585380	MSTRG.13430.1(66571318:66585380);Zm00001d024357_T001(66571406:66571900)
10	66585060	66585079	+	66585074	intergenic	MSTRG.13430	66571318-66585380	MSTRG.13430.1(66571318:66585380);Zm00001d024357_T001(66571406:66571900)
10	66585108	66585186	+	66585117	intergenic	MSTRG.13430	66571318-66585380	MSTRG.13430.1(66571318:66585380);Zm00001d024357_T001(66571406:66571900)
10	68370696	68370719	+	68370719	intergenic	MSTRG.13462	68270974-68371440	MSTRG.13462.1(68270974:68371440);MSTRG.13462.2(68271023:68326115)
10	71436296	71436296	+	71436296	intergenic	MSTRG.13548	71428956-71752764	Zm00001d024450_T001(71428956:71430173);MSTRG.13548.2(71428974:71752764);MSTRG.13548.3(71428974:71430672);MSTRG.13548.4(71428994:71430567);MSTRG.13548.5(71721119:71750645);MSTRG.13548.6(71721119:71721979);MSTRG.13548.7(71721119:71721905);MSTRG.13548.8(71721180:71721905);MSTRG.13548.9(71749007:71750701);MSTRG.13548.10(71749058:71750577)
10	71472028	71472028	+	71472028	intergenic	MSTRG.13548	71428956-71752764	Zm00001d024450_T001(71428956:71430173);MSTRG.13548.2(71428974:71752764);MSTRG.13548.3(71428974:71430672);MSTRG.13548.4(71428994:71430567);MSTRG.13548.5(71721119:71750645);MSTRG.13548.6(71721119:71721979);MSTRG.13548.7(71721119:71721905);MSTRG.13548.8(71721180:71721905);MSTRG.13548.9(71749007:71750701);MSTRG.13548.10(71749058:71750577)
10	71721893	71721893	+	71721893	intergenic	MSTRG.13548	71428956-71752764	Zm00001d024450_T001(71428956:71430173);MSTRG.13548.2(71428974:71752764);MSTRG.13548.3(71428974:71430672);MSTRG.13548.4(71428994:71430567);MSTRG.13548.5(71721119:71750645);MSTRG.13548.6(71721119:71721979);MSTRG.13548.7(71721119:71721905);MSTRG.13548.8(71721180:71721905);MSTRG.13548.9(71749007:71750701);MSTRG.13548.10(71749058:71750577)
10	71725113	71725117	+	71725117	intergenic	MSTRG.13548	71428956-71752764	Zm00001d024450_T001(71428956:71430173);MSTRG.13548.2(71428974:71752764);MSTRG.13548.3(71428974:71430672);MSTRG.13548.4(71428994:71430567);MSTRG.13548.5(71721119:71750645);MSTRG.13548.6(71721119:71721979);MSTRG.13548.7(71721119:71721905);MSTRG.13548.8(71721180:71721905);MSTRG.13548.9(71749007:71750701);MSTRG.13548.10(71749058:71750577)
10	71750486	71750486	+	71750486	intergenic	MSTRG.13548	71428956-71752764	Zm00001d024450_T001(71428956:71430173);MSTRG.13548.2(71428974:71752764);MSTRG.13548.3(71428974:71430672);MSTRG.13548.4(71428994:71430567);MSTRG.13548.5(71721119:71750645);MSTRG.13548.6(71721119:71721979);MSTRG.13548.7(71721119:71721905);MSTRG.13548.8(71721180:71721905);MSTRG.13548.9(71749007:71750701);MSTRG.13548.10(71749058:71750577)
10	71750592	71750594	+	71750592	intergenic	MSTRG.13548	71428956-71752764	Zm00001d024450_T001(71428956:71430173);MSTRG.13548.2(71428974:71752764);MSTRG.13548.3(71428974:71430672);MSTRG.13548.4(71428994:71430567);MSTRG.13548.5(71721119:71750645);MSTRG.13548.6(71721119:71721979);MSTRG.13548.7(71721119:71721905);MSTRG.13548.8(71721180:71721905);MSTRG.13548.9(71749007:71750701);MSTRG.13548.10(71749058:71750577)
10	76674459	76674459	+	76674459	intergenic	MSTRG.13667	76628321-76674882	MSTRG.13667.1(76628321:76635128);MSTRG.13667.2(76628321:76674882);Zm00001d024531_T001(76628321:76635128);Zm00001d024531_T002(76628333:76635128);Zm00001d024531_T004(76628527:76635128);MSTRG.13667.6(76628720:76635128);Zm00001d024531_T005(76631352:76634762);Zm00001d024531_T006(76631811:76635127);Zm00001d024531_T007(76633454:76634762)
10	76674520	76674532	+	76674532	intergenic	MSTRG.13667	76628321-76674882	MSTRG.13667.1(76628321:76635128);MSTRG.13667.2(76628321:76674882);Zm00001d024531_T001(76628321:76635128);Zm00001d024531_T002(76628333:76635128);Zm00001d024531_T004(76628527:76635128);MSTRG.13667.6(76628720:76635128);Zm00001d024531_T005(76631352:76634762);Zm00001d024531_T006(76631811:76635127);Zm00001d024531_T007(76633454:76634762)
10	76674765	76674765	+	76674765	intergenic	MSTRG.13667	76628321-76674882	MSTRG.13667.1(76628321:76635128);MSTRG.13667.2(76628321:76674882);Zm00001d024531_T001(76628321:76635128);Zm00001d024531_T002(76628333:76635128);Zm00001d024531_T004(76628527:76635128);MSTRG.13667.6(76628720:76635128);Zm00001d024531_T005(76631352:76634762);Zm00001d024531_T006(76631811:76635127);Zm00001d024531_T007(76633454:76634762)
10	76840099	76840297	+	76840241	intergenic	MSTRG.13673	76826710-76845268	MSTRG.13673.1(76826710:76841091);MSTRG.13673.2(76836394:76845268);MSTRG.13673.3(76836394:76840659);MSTRG.13673.4(76836394:76840703);MSTRG.13673.5(76836394:76840965);MSTRG.13673.6(76836394:76840722);MSTRG.13673.7(76836394:76840676);MSTRG.13673.8(76836394:76840638);MSTRG.13673.9(76836394:76840587);Zm00001d024533_T001(76836394:76839591);MSTRG.13673.11(76836406:76840699);Zm00001d024534_T001(76841341:…
10	76840334	76840368	+	76840368	intergenic	MSTRG.13673	76826710-76845268	MSTRG.13673.1(76826710:76841091);MSTRG.13673.2(76836394:76845268);MSTRG.13673.3(76836394:76840659);MSTRG.13673.4(76836394:76840703);MSTRG.13673.5(76836394:76840965);MSTRG.13673.6(76836394:76840722);MSTRG.13673.7(76836394:76840676);MSTRG.13673.8(76836394:76840638);MSTRG.13673.9(76836394:76840587);Zm00001d024533_T001(76836394:76839591);MSTRG.13673.11(76836406:76840699);Zm00001d024534_T001(76841341:…
10	76840571	76840571	+	76840571	intergenic	MSTRG.13673	76826710-76845268	MSTRG.13673.1(76826710:76841091);MSTRG.13673.2(76836394:76845268);MSTRG.13673.3(76836394:76840659);MSTRG.13673.4(76836394:76840703);MSTRG.13673.5(76836394:76840965);MSTRG.13673.6(76836394:76840722);MSTRG.13673.7(76836394:76840676);MSTRG.13673.8(76836394:76840638);MSTRG.13673.9(76836394:76840587);Zm00001d024533_T001(76836394:76839591);MSTRG.13673.11(76836406:76840699);Zm00001d024534_T001(76841341:…
10	76840610	76840632	+	76840623	intergenic	MSTRG.13673	76826710-76845268	MSTRG.13673.1(76826710:76841091);MSTRG.13673.2(76836394:76845268);MSTRG.13673.3(76836394:76840659);MSTRG.13673.4(76836394:76840703);MSTRG.13673.5(76836394:76840965);MSTRG.13673.6(76836394:76840722);MSTRG.13673.7(76836394:76840676);MSTRG.13673.8(76836394:76840638);MSTRG.13673.9(76836394:76840587);Zm00001d024533_T001(76836394:76839591);MSTRG.13673.11(76836406:76840699);Zm00001d024534_T001(76841341:…
10	76840667	76840676	+	76840667	intergenic	MSTRG.13673	76826710-76845268	MSTRG.13673.1(76826710:76841091);MSTRG.13673.2(76836394:76845268);MSTRG.13673.3(76836394:76840659);MSTRG.13673.4(76836394:76840703);MSTRG.13673.5(76836394:76840965);MSTRG.13673.6(76836394:76840722);MSTRG.13673.7(76836394:76840676);MSTRG.13673.8(76836394:76840638);MSTRG.13673.9(76836394:76840587);Zm00001d024533_T001(76836394:76839591);MSTRG.13673.11(76836406:76840699);Zm00001d024534_T001(76841341:…
10	76840739	76840757	+	76840757	intergenic	MSTRG.13673	76826710-76845268	MSTRG.13673.1(76826710:76841091);MSTRG.13673.2(76836394:76845268);MSTRG.13673.3(76836394:76840659);MSTRG.13673.4(76836394:76840703);MSTRG.13673.5(76836394:76840965);MSTRG.13673.6(76836394:76840722);MSTRG.13673.7(76836394:76840676);MSTRG.13673.8(76836394:76840638);MSTRG.13673.9(76836394:76840587);Zm00001d024533_T001(76836394:76839591);MSTRG.13673.11(76836406:76840699);Zm00001d024534_T001(76841341:…
10	76841185	76841185	+	76841185	intergenic	MSTRG.13673	76826710-76845268	MSTRG.13673.1(76826710:76841091);MSTRG.13673.2(76836394:76845268);MSTRG.13673.3(76836394:76840659);MSTRG.13673.4(76836394:76840703);MSTRG.13673.5(76836394:76840965);MSTRG.13673.6(76836394:76840722);MSTRG.13673.7(76836394:76840676);MSTRG.13673.8(76836394:76840638);MSTRG.13673.9(76836394:76840587);Zm00001d024533_T001(76836394:76839591);MSTRG.13673.11(76836406:76840699);Zm00001d024534_T001(76841341:…
10	78124302	78124312	+	78124302	intergenic	MSTRG.13709	78089998-78127085	MSTRG.13709.1(78089998:78103030);MSTRG.13709.2(78090465:78094807);MSTRG.13709.3(78090465:78123021);MSTRG.13709.4(78090481:78102932);MSTRG.13709.5(78090609:78102937);MSTRG.13709.6(78090715:78094702);MSTRG.13709.7(78095451:78124223);MSTRG.13709.8(78121082:78127027);MSTRG.13709.9(78121082:78127085);MSTRG.13709.10(78121115:78127085)
10	79475186	79475186	+	79475186	intergenic	MSTRG.13741	79474768-79544498	MSTRG.13741.1(79474768:79544498);MSTRG.13741.2(79475811:79502451)
10	79475222	79475222	+	79475222	intergenic	MSTRG.13741	79474768-79544498	MSTRG.13741.1(79474768:79544498);MSTRG.13741.2(79475811:79502451)
10	79475262	79475262	+	79475262	intergenic	MSTRG.13741	79474768-79544498	MSTRG.13741.1(79474768:79544498);MSTRG.13741.2(79475811:79502451)
10	79479917	79479917	+	79479917	intergenic	MSTRG.13741	79474768-79544498	MSTRG.13741.1(79474768:79544498);MSTRG.13741.2(79475811:79502451)
10	79989088	79989110	+	79989088	intergenic	MSTRG.13754	79988509-79999425	MSTRG.13754.1(79988509:79999265);MSTRG.13754.2(79988631:79999425);MSTRG.13754.3(79988665:79999263);MSTRG.13754.4(79993691:79999333)
10	79998977	79998977	+	79998977	intergenic	MSTRG.13754	79988509-79999425	MSTRG.13754.1(79988509:79999265);MSTRG.13754.2(79988631:79999425);MSTRG.13754.3(79988665:79999263);MSTRG.13754.4(79993691:79999333)
10	79999036	79999036	+	79999036	intergenic	MSTRG.13754	79988509-79999425	MSTRG.13754.1(79988509:79999265);MSTRG.13754.2(79988631:79999425);MSTRG.13754.3(79988665:79999263);MSTRG.13754.4(79993691:79999333)
10	79999294	79999297	+	79999294	intergenic	MSTRG.13754	79988509-79999425	MSTRG.13754.1(79988509:79999265);MSTRG.13754.2(79988631:79999425);MSTRG.13754.3(79988665:79999263);MSTRG.13754.4(79993691:79999333)
10	80140857	80140923	+	80140873	intergenic	MSTRG.13761	80137465-80141116	Zm00001d024605_T001(80137465:80140638);MSTRG.13761.2(80137631:80141116)
10	80141077	80141077	+	80141077	intergenic	MSTRG.13761	80137465-80141116	Zm00001d024605_T001(80137465:80140638);MSTRG.13761.2(80137631:80141116)
10	80277705	80277754	+	80277727	intergenic	MSTRG.13766;MSTRG.13769	80254562-80305529;80274973-80277841	MSTRG.13766.1(80254562:80305529);Zm00001d024610_T001(80279185:80279870);MSTRG.13769.1(80274973:80277841);MSTRG.13769.2(80274973:80277828);MSTRG.13769.3(80274973:80277828)
10	80277863	80277863	+	80277863	intergenic	MSTRG.13766	80254562-80305529	MSTRG.13766.1(80254562:80305529);Zm00001d024610_T001(80279185:80279870)
10	80408316	80408316	+	80408316	intergenic	MSTRG.13782	80408010-80408379	MSTRG.13782.1(80408010:80408379)
10	81231341	81231341	+	81231341	intergenic	MSTRG.13800	81230807-81231471	MSTRG.13800.1(81230807:81231471)
10	86555266	86555270	+	86555270	intergenic	MSTRG.13975	86553696-86555502	MSTRG.13975.1(86553696:86555502);Zm00001d024757_T001(86553758:86554777)
10	86555303	86555322	+	86555322	intergenic	MSTRG.13975	86553696-86555502	MSTRG.13975.1(86553696:86555502);Zm00001d024757_T001(86553758:86554777)
10	86555351	86555402	+	86555356	intergenic	MSTRG.13975	86553696-86555502	MSTRG.13975.1(86553696:86555502);Zm00001d024757_T001(86553758:86554777)
10	87307604	87307635	+	87307611	intergenic	MSTRG.13999	87304864-87307694	MSTRG.13999.1(87304864:87307694);MSTRG.13999.2(87304885:87307694);MSTRG.13999.3(87304949:87307628);MSTRG.13999.4(87304949:87307628)
10	88761484	88761576	+	88761565	intergenic	MSTRG.14036	88741519-88761648	MSTRG.14036.1(88741519:88761638);Zm00001d024803_T001(88741519:88753055);MSTRG.14036.3(88741579:88761590);MSTRG.14036.4(88741636:88761648);MSTRG.14036.5(88741637:88761630);MSTRG.14036.6(88741690:88761610)
10	88761631	88761631	+	88761631	intergenic	MSTRG.14036	88741519-88761648	MSTRG.14036.1(88741519:88761638);Zm00001d024803_T001(88741519:88753055);MSTRG.14036.3(88741579:88761590);MSTRG.14036.4(88741636:88761648);MSTRG.14036.5(88741637:88761630);MSTRG.14036.6(88741690:88761610)
10	93408269	93408269	+	93408269	intergenic	MSTRG.14164	93373384-93612078	MSTRG.14164.1(93373384:93612078);Zm00001d024897_T001(93611227:93611538)
10	94249922	94249940	+	94249940	intergenic	MSTRG.14186	94248615-94249996	MSTRG.14186.1(94248615:94249996)
10	96362149	96362149	+	96362149	intergenic	MSTRG.14256	96358676-96362396	MSTRG.14256.1(96358676:96362396);MSTRG.14256.2(96360191:96362396);MSTRG.14256.3(96361077:96362189)
10	96588412	96588412	+	96588412	intergenic	MSTRG.14268	96586505-96595083	MSTRG.14268.1(96586505:96595083);MSTRG.14268.2(96586637:96591785);MSTRG.14268.3(96586644:96591776)
10	96588483	96588483	+	96588483	intergenic	MSTRG.14268	96586505-96595083	MSTRG.14268.1(96586505:96595083);MSTRG.14268.2(96586637:96591785);MSTRG.14268.3(96586644:96591776)
10	97690094	97690098	+	97690094	intergenic	MSTRG.14291	97673568-97691653	MSTRG.14291.1(97673568:97690316);Zm00001d024973_T001(97673568:97680486);Zm00001d024973_T002(97673568:97680486);Zm00001d024973_T003(97673568:97680486);MSTRG.14291.5(97673578:97691653);MSTRG.14291.6(97673578:97690249);Zm00001d024973_T004(97673578:97680486);Zm00001d024973_T005(97673578:97680486);MSTRG.14291.9(97673598:97690221);Zm00001d024973_T006(97673603:97680486);MSTRG.14291.11(97673622:97690047)…
10	98111830	98111830	+	98111830	intergenic	MSTRG.14304	98111421-98114913	MSTRG.14304.1(98111421:98114913)
10	101995773	101995775	+	101995773	intergenic	MSTRG.14413	101993596-101995844	MSTRG.14413.1(101993596:101995844)
10	105453880	105453880	+	105453880	intergenic	MSTRG.14489	105414302-105496365	Zm00001d025124_T001(105414302:105453243);MSTRG.14489.2(105414322:105496365);MSTRG.14489.3(105414322:105496228);MSTRG.14489.4(105414346:105496364);MSTRG.14489.5(105414374:105496237);MSTRG.14489.6(105414380:105496308);MSTRG.14489.7(105414394:105496212);MSTRG.14489.8(105414398:105496132);Zm00001d025125_T001(105472286:105496243);Zm00001d025125_T002(105472286:105496243);MSTRG.14489.11(105484375:105496…
10	107032332	107032332	+	107032332	intergenic	MSTRG.14540	106964303-107140969	Zm00001d025160_T001(106964303:106965933);MSTRG.14540.2(106964391:107140969);MSTRG.14540.3(106964430:106965933);Zm00001d025165_T001(107136495:107140951);Zm00001d025165_T002(107136518:107140950);Zm00001d025165_T003(107136541:107140951);Zm00001d025165_T004(107138623:107140840)
10	107188572	107188572	+	107188572	intergenic	MSTRG.14551	107181381-107192686	Zm00001d025167_T001(107181381:107187909);Zm00001d025167_T003(107181381:107187909);Zm00001d025167_T002(107181381:107187909);Zm00001d025167_T005(107181383:107187869);Zm00001d025167_T004(107181383:107186517);Zm00001d025167_T006(107181424:107187886);Zm00001d025167_T008(107181425:107187850);Zm00001d025167_T010(107181425:107187872);Zm00001d025167_T007(107181425:107187796);Zm00001d025167_T009(107181425:…
10	109970202	109970352	+	109970226	intergenic	MSTRG.14626	109967184-109975866	MSTRG.14626.1(109967184:109975866);MSTRG.14626.2(109967184:109972163);MSTRG.14626.3(109967184:109974465);Zm00001d025222_T001(109967184:109969328);MSTRG.14626.5(109967192:109972148);MSTRG.14626.6(109967218:109971301);MSTRG.14626.7(109967250:109971347)
10	109971071	109971076	+	109971071	intergenic	MSTRG.14626	109967184-109975866	MSTRG.14626.1(109967184:109975866);MSTRG.14626.2(109967184:109972163);MSTRG.14626.3(109967184:109974465);Zm00001d025222_T001(109967184:109969328);MSTRG.14626.5(109967192:109972148);MSTRG.14626.6(109967218:109971301);MSTRG.14626.7(109967250:109971347)
10	109971126	109971170	+	109971144	intergenic	MSTRG.14626	109967184-109975866	MSTRG.14626.1(109967184:109975866);MSTRG.14626.2(109967184:109972163);MSTRG.14626.3(109967184:109974465);Zm00001d025222_T001(109967184:109969328);MSTRG.14626.5(109967192:109972148);MSTRG.14626.6(109967218:109971301);MSTRG.14626.7(109967250:109971347)
10	109971208	109971222	+	109971222	intergenic	MSTRG.14626	109967184-109975866	MSTRG.14626.1(109967184:109975866);MSTRG.14626.2(109967184:109972163);MSTRG.14626.3(109967184:109974465);Zm00001d025222_T001(109967184:109969328);MSTRG.14626.5(109967192:109972148);MSTRG.14626.6(109967218:109971301);MSTRG.14626.7(109967250:109971347)
10	109972123	109972123	+	109972123	intergenic	MSTRG.14626	109967184-109975866	MSTRG.14626.1(109967184:109975866);MSTRG.14626.2(109967184:109972163);MSTRG.14626.3(109967184:109974465);Zm00001d025222_T001(109967184:109969328);MSTRG.14626.5(109967192:109972148);MSTRG.14626.6(109967218:109971301);MSTRG.14626.7(109967250:109971347)
10	110574928	110575090	+	110575066	intergenic	MSTRG.14654	110571158-110575192	MSTRG.14654.1(110571158:110575192);MSTRG.14654.2(110572007:110575043);MSTRG.14654.3(110572318:110575063);Zm00001d025238_T001(110572318:110574522)
10	110575122	110575129	+	110575122	intergenic	MSTRG.14654	110571158-110575192	MSTRG.14654.1(110571158:110575192);MSTRG.14654.2(110572007:110575043);MSTRG.14654.3(110572318:110575063);Zm00001d025238_T001(110572318:110574522)
10	112880629	112880631	+	112880631	intergenic	MSTRG.14720	112880141-112888472	MSTRG.14720.1(112880141:112888472)
10	112880752	112880752	+	112880752	intergenic	MSTRG.14720	112880141-112888472	MSTRG.14720.1(112880141:112888472)
10	112927600	112927600	+	112927600	intergenic	MSTRG.14721	112919810-112984868	Zm00001d025291_T001(112919810:112922524);MSTRG.14721.2(112919862:112984868);MSTRG.14721.3(112919874:112984868);Zm00001d025294_T001(112973342:112984868);Zm00001d025294_T002(112973342:112984868)
10	112927653	112927653	+	112927653	intergenic	MSTRG.14721	112919810-112984868	Zm00001d025291_T001(112919810:112922524);MSTRG.14721.2(112919862:112984868);MSTRG.14721.3(112919874:112984868);Zm00001d025294_T001(112973342:112984868);Zm00001d025294_T002(112973342:112984868)
10	112931837	112931837	+	112931837	intergenic	MSTRG.14721	112919810-112984868	Zm00001d025291_T001(112919810:112922524);MSTRG.14721.2(112919862:112984868);MSTRG.14721.3(112919874:112984868);Zm00001d025294_T001(112973342:112984868);Zm00001d025294_T002(112973342:112984868)
10	113916215	113916233	+	113916215	intergenic	MSTRG.14752	113915670-113919573	MSTRG.14752.1(113915670:113919573);MSTRG.14752.2(113915695:113919524);MSTRG.14752.3(113915695:113919524);MSTRG.14752.4(113915705:113919524);MSTRG.14752.5(113917508:113919031)
10	113916260	113916260	+	113916260	intergenic	MSTRG.14752	113915670-113919573	MSTRG.14752.1(113915670:113919573);MSTRG.14752.2(113915695:113919524);MSTRG.14752.3(113915695:113919524);MSTRG.14752.4(113915705:113919524);MSTRG.14752.5(113917508:113919031)
10	113919319	113919319	+	113919319	intergenic	MSTRG.14752	113915670-113919573	MSTRG.14752.1(113915670:113919573);MSTRG.14752.2(113915695:113919524);MSTRG.14752.3(113915695:113919524);MSTRG.14752.4(113915705:113919524);MSTRG.14752.5(113917508:113919031)
10	114015544	114015544	+	114015544	intergenic	MSTRG.14755;MSTRG.14756	113981969-114038238;114014629-114016247	MSTRG.14755.1(113981969:114038238);Zm00001d025319_T001(114036152:114037488);MSTRG.14756.1(114014629:114016247)
10	115195821	115195839	+	115195822	intergenic	MSTRG.14797	115145543-115195981	MSTRG.14797.1(115145543:115195981);MSTRG.14797.2(115192018:115195221);MSTRG.14797.3(115192023:115195965);MSTRG.14797.4(115194757:115195381);Zm00001d025352_T001(115194757:115195221)
10	116413535	116413546	+	116413535	intergenic	MSTRG.14837	116413111-116413672	MSTRG.14837.1(116413111:116413672)
10	116504047	116504047	+	116504047	intergenic	MSTRG.14840	116494164-116504424	MSTRG.14840.1(116494164:116503570);MSTRG.14840.2(116494195:116503861);MSTRG.14840.3(116494259:116503523);MSTRG.14840.4(116494287:116504424);MSTRG.14840.5(116494294:116503523);MSTRG.14840.6(116494294:116503523);MSTRG.14840.7(116494305:116503792);Zm00001d025380_T001(116495636:116503536);Zm00001d025380_T002(116495939:116503535);Zm00001d025380_T003(116496409:116503523);MSTRG.14840.11(116496409:116503…
10	119879242	119879242	+	119879242	intergenic	MSTRG.14968	119875877-119879333	Zm00001d025469_T001(119875877:119878890);Zm00001d025469_T002(119875894:119878635);MSTRG.14968.3(119875912:119879333)
10	119879307	119879307	+	119879307	intergenic	MSTRG.14968	119875877-119879333	Zm00001d025469_T001(119875877:119878890);Zm00001d025469_T002(119875894:119878635);MSTRG.14968.3(119875912:119879333)
10	120090404	120090404	+	120090404	intergenic	MSTRG.14984	120070810-120093321	MSTRG.14984.1(120070810:120072839);MSTRG.14984.2(120070810:120077570);MSTRG.14984.3(120070832:120093172);MSTRG.14984.4(120070897:120093094);MSTRG.14984.5(120070897:120093321);MSTRG.14984.6(120075914:120093073)
10	120092972	120092972	+	120092972	intergenic	MSTRG.14984	120070810-120093321	MSTRG.14984.1(120070810:120072839);MSTRG.14984.2(120070810:120077570);MSTRG.14984.3(120070832:120093172);MSTRG.14984.4(120070897:120093094);MSTRG.14984.5(120070897:120093321);MSTRG.14984.6(120075914:120093073)
10	120093099	120093099	+	120093099	intergenic	MSTRG.14984	120070810-120093321	MSTRG.14984.1(120070810:120072839);MSTRG.14984.2(120070810:120077570);MSTRG.14984.3(120070832:120093172);MSTRG.14984.4(120070897:120093094);MSTRG.14984.5(120070897:120093321);MSTRG.14984.6(120075914:120093073)
10	120093192	120093192	+	120093192	intergenic	MSTRG.14984	120070810-120093321	MSTRG.14984.1(120070810:120072839);MSTRG.14984.2(120070810:120077570);MSTRG.14984.3(120070832:120093172);MSTRG.14984.4(120070897:120093094);MSTRG.14984.5(120070897:120093321);MSTRG.14984.6(120075914:120093073)
10	120093223	120093228	+	120093228	intergenic	MSTRG.14984	120070810-120093321	MSTRG.14984.1(120070810:120072839);MSTRG.14984.2(120070810:120077570);MSTRG.14984.3(120070832:120093172);MSTRG.14984.4(120070897:120093094);MSTRG.14984.5(120070897:120093321);MSTRG.14984.6(120075914:120093073)
10	120093267	120093267	+	120093267	intergenic	MSTRG.14984	120070810-120093321	MSTRG.14984.1(120070810:120072839);MSTRG.14984.2(120070810:120077570);MSTRG.14984.3(120070832:120093172);MSTRG.14984.4(120070897:120093094);MSTRG.14984.5(120070897:120093321);MSTRG.14984.6(120075914:120093073)
10	120959644	120959781	+	120959765	intergenic	MSTRG.15015	120955175-120959802	Zm00001d025513_T001(120955175:120959570);MSTRG.15015.2(120955177:120959802);MSTRG.15015.3(120955177:120959802);MSTRG.15015.4(120955178:120959783)
10	121850778	121850778	+	121850778	intergenic	MSTRG.15050	121844670-121850944	MSTRG.15050.1(121844670:121850944);MSTRG.15050.2(121844735:121850908);Zm00001d025544_T001(121844880:121845467);Zm00001d025545_T001(121846235:121850530)
10	121850807	121850817	+	121850807	intergenic	MSTRG.15050	121844670-121850944	MSTRG.15050.1(121844670:121850944);MSTRG.15050.2(121844735:121850908);Zm00001d025544_T001(121844880:121845467);Zm00001d025545_T001(121846235:121850530)
10	121850851	121850878	+	121850860	intergenic	MSTRG.15050	121844670-121850944	MSTRG.15050.1(121844670:121850944);MSTRG.15050.2(121844735:121850908);Zm00001d025544_T001(121844880:121845467);Zm00001d025545_T001(121846235:121850530)
10	121868253	121868253	+	121868253	intergenic	MSTRG.15052	121866136-121873490	MSTRG.15052.1(121866136:121873490);MSTRG.15052.2(121866193:121871260)
10	121869087	121869087	+	121869087	intergenic	MSTRG.15052	121866136-121873490	MSTRG.15052.1(121866136:121873490);MSTRG.15052.2(121866193:121871260)
10	121870339	121870339	+	121870339	intergenic	MSTRG.15052	121866136-121873490	MSTRG.15052.1(121866136:121873490);MSTRG.15052.2(121866193:121871260)
10	121870610	121870649	+	121870615	intergenic	MSTRG.15052	121866136-121873490	MSTRG.15052.1(121866136:121873490);MSTRG.15052.2(121866193:121871260)
10	121870694	121870712	+	121870712	intergenic	MSTRG.15052	121866136-121873490	MSTRG.15052.1(121866136:121873490);MSTRG.15052.2(121866193:121871260)
10	121870785	121870785	+	121870785	intergenic	MSTRG.15052	121866136-121873490	MSTRG.15052.1(121866136:121873490);MSTRG.15052.2(121866193:121871260)
10	121871065	121871065	+	121871065	intergenic	MSTRG.15052	121866136-121873490	MSTRG.15052.1(121866136:121873490);MSTRG.15052.2(121866193:121871260)
10	121871098	121871104	+	121871104	intergenic	MSTRG.15052	121866136-121873490	MSTRG.15052.1(121866136:121873490);MSTRG.15052.2(121866193:121871260)
10	123323283	123323283	+	123323283	intergenic	MSTRG.15120	123321474-123328063	MSTRG.15120.1(123321474:123328063)
10	124123283	124123283	+	124123283	intergenic	MSTRG.15141	124109544-124148744	MSTRG.15141.1(124109544:124148744);Zm00001d025617_T001(124144806:124148744);Zm00001d025617_T002(124144806:124148744);Zm00001d025617_T003(124144913:124148530);Zm00001d025617_T004(124145039:124148744);MSTRG.15141.6(124145056:124148561);Zm00001d025617_T006(124145056:124148744);Zm00001d025617_T005(124145056:124148744);Zm00001d023166_T001(124145056:124145622);MSTRG.15141.10(124145085:124148561);Zm0000…
10	125106507	125106507	+	125106507	intergenic	MSTRG.15194	125105697-125107434	MSTRG.15194.1(125105697:125107434)
10	127607678	127607678	+	127607678	intergenic	MSTRG.15325	127606650-127609035	MSTRG.15325.1(127606650:127609035)
10	128655312	128655312	+	128655312	intergenic	MSTRG.15381	128651771-128742460	MSTRG.15381.1(128651771:128657870);MSTRG.15381.2(128651798:128657842);MSTRG.15381.3(128651859:128742460);MSTRG.15381.4(128652530:128657866)
10	129541197	129541209	+	129541197	intergenic	MSTRG.15414	129538564-129541417	MSTRG.15414.1(129538564:129541417)
10	129541311	129541311	+	129541311	intergenic	MSTRG.15414	129538564-129541417	MSTRG.15414.1(129538564:129541417)
10	130034811	130034811	+	130034811	intergenic	MSTRG.15443	130013548-130099370	MSTRG.15443.1(130013548:130099370)
10	130720028	130720206	+	130720149	intergenic	MSTRG.15470	130718165-130720236	MSTRG.15470.1(130718165:130720236);Zm00001d025822_T001(130718242:130719958)
10	131245941	131245941	+	131245941	intergenic	MSTRG.15490	131243971-131246049	MSTRG.15490.1(131243971:131246049);Zm00001d025831_T001(131243971:131245467)
10	131246023	131246023	+	131246023	intergenic	MSTRG.15490	131243971-131246049	MSTRG.15490.1(131243971:131246049);Zm00001d025831_T001(131243971:131245467)
10	131517033	131517033	+	131517033	intergenic	MSTRG.15520	131516377-131520567	MSTRG.15520.1(131516377:131520567);MSTRG.15520.2(131516377:131520338)
10	131517732	131517732	+	131517732	intergenic	MSTRG.15520	131516377-131520567	MSTRG.15520.1(131516377:131520567);MSTRG.15520.2(131516377:131520338)
10	133767965	133767965	+	133767965	intergenic	MSTRG.15625	133759486-133768111	Zm00001d025919_T001(133759486:133767792);MSTRG.15625.2(133759587:133767920);Zm00001d025919_T002(133759587:133766340);Zm00001d025919_T003(133759606:133766276);Zm00001d025919_T004(133759608:133766387);Zm00001d025919_T005(133759614:133766314);Zm00001d025919_T006(133759663:133766278);Zm00001d025919_T007(133759663:133766321);MSTRG.15625.9(133759710:133767792);Zm00001d025919_T008(133760551:133766330);M…
10	133768012	133768027	+	133768012	intergenic	MSTRG.15625	133759486-133768111	Zm00001d025919_T001(133759486:133767792);MSTRG.15625.2(133759587:133767920);Zm00001d025919_T002(133759587:133766340);Zm00001d025919_T003(133759606:133766276);Zm00001d025919_T004(133759608:133766387);Zm00001d025919_T005(133759614:133766314);Zm00001d025919_T006(133759663:133766278);Zm00001d025919_T007(133759663:133766321);MSTRG.15625.9(133759710:133767792);Zm00001d025919_T008(133760551:133766330);M…
10	133770333	133770340	+	133770333	intergenic	MSTRG.15629	133768126-133780908	MSTRG.15629.1(133768126:133780821);Zm00001d025921_T001(133772841:133780821);MSTRG.15629.3(133777935:133780908)
10	134930283	134930283	+	134930283	intergenic	MSTRG.15690	134929698-134930774	MSTRG.15690.1(134929698:134930774)
10	134930328	134930339	+	134930338	intergenic	MSTRG.15690	134929698-134930774	MSTRG.15690.1(134929698:134930774)
10	134930370	134930374	+	134930370	intergenic	MSTRG.15690	134929698-134930774	MSTRG.15690.1(134929698:134930774)
10	134930407	134930414	+	134930407	intergenic	MSTRG.15690	134929698-134930774	MSTRG.15690.1(134929698:134930774)
10	135293309	135293309	+	135293309	intergenic	MSTRG.15720	135279785-135293543	MSTRG.15720.1(135279785:135287133);Zm00001d025981_T001(135279805:135284278);Zm00001d025981_T004(135279807:135287063);Zm00001d025981_T005(135279807:135291483);Zm00001d025981_T002(135279807:135286890);Zm00001d025981_T003(135279807:135287043);Zm00001d025981_T006(135279817:135286991);Zm00001d025981_T008(135279818:135283747);Zm00001d025981_T009(135279818:135283887);Zm00001d025981_T012(135279825:135291…
10	135293336	135293336	+	135293336	intergenic	MSTRG.15720	135279785-135293543	MSTRG.15720.1(135279785:135287133);Zm00001d025981_T001(135279805:135284278);Zm00001d025981_T004(135279807:135287063);Zm00001d025981_T005(135279807:135291483);Zm00001d025981_T002(135279807:135286890);Zm00001d025981_T003(135279807:135287043);Zm00001d025981_T006(135279817:135286991);Zm00001d025981_T008(135279818:135283747);Zm00001d025981_T009(135279818:135283887);Zm00001d025981_T012(135279825:135291…
10	135293371	135293411	+	135293375	intergenic	MSTRG.15720	135279785-135293543	MSTRG.15720.1(135279785:135287133);Zm00001d025981_T001(135279805:135284278);Zm00001d025981_T004(135279807:135287063);Zm00001d025981_T005(135279807:135291483);Zm00001d025981_T002(135279807:135286890);Zm00001d025981_T003(135279807:135287043);Zm00001d025981_T006(135279817:135286991);Zm00001d025981_T008(135279818:135283747);Zm00001d025981_T009(135279818:135283887);Zm00001d025981_T012(135279825:135291…
10	135293452	135293478	+	135293452	intergenic	MSTRG.15720	135279785-135293543	MSTRG.15720.1(135279785:135287133);Zm00001d025981_T001(135279805:135284278);Zm00001d025981_T004(135279807:135287063);Zm00001d025981_T005(135279807:135291483);Zm00001d025981_T002(135279807:135286890);Zm00001d025981_T003(135279807:135287043);Zm00001d025981_T006(135279817:135286991);Zm00001d025981_T008(135279818:135283747);Zm00001d025981_T009(135279818:135283887);Zm00001d025981_T012(135279825:135291…
10	135677859	135677859	+	135677859	intergenic	MSTRG.15748	135677539-135678380	MSTRG.15748.1(135677539:135678380)
10	135678028	135678028	+	135678028	intergenic	MSTRG.15748	135677539-135678380	MSTRG.15748.1(135677539:135678380)
10	135678077	135678077	+	135678077	intergenic	MSTRG.15748	135677539-135678380	MSTRG.15748.1(135677539:135678380)
10	135763702	135763702	+	135763702	intergenic	MSTRG.15753	135741659-135763796	Zm00001d026000_T001(135741659:135750296);MSTRG.15753.2(135741680:135763796);Zm00001d026000_T002(135741680:135750293);Zm00001d026000_T003(135741683:135750266);MSTRG.15753.5(135741727:135750279);MSTRG.15753.6(135741727:135763763);Zm00001d026000_T004(135741727:135750293);MSTRG.15753.8(135741769:135750266);MSTRG.15753.9(135741787:135750296);MSTRG.15753.10(135741815:135750279);Zm00001d026000_T005(1357…
10	136407897	136407897	+	136407897	intergenic	MSTRG.15770;MSTRG.15784;MSTRG.15797	136050310-136549919;136263893-136505087;136405187-136408038	MSTRG.15770.1(136050310:136549833);MSTRG.15770.2(136050476:136179753);Zm00001d026018_T003(136174872:136179753);Zm00001d026018_T002(136174872:136179161);Zm00001d026018_T001(136174872:136179161);MSTRG.15770.6(136175017:136179666);Zm00001d026018_T004(136175102:136179753);Zm00001d026018_T005(136175735:136179753);MSTRG.15770.9(136542456:136549919);Zm00001d026036_T001(136545479:136549919);MSTRG.15770.1…
10	136407937	136407937	+	136407937	intergenic	MSTRG.15770;MSTRG.15784;MSTRG.15797	136050310-136549919;136263893-136505087;136405187-136408038	MSTRG.15770.1(136050310:136549833);MSTRG.15770.2(136050476:136179753);Zm00001d026018_T003(136174872:136179753);Zm00001d026018_T002(136174872:136179161);Zm00001d026018_T001(136174872:136179161);MSTRG.15770.6(136175017:136179666);Zm00001d026018_T004(136175102:136179753);Zm00001d026018_T005(136175735:136179753);MSTRG.15770.9(136542456:136549919);Zm00001d026036_T001(136545479:136549919);MSTRG.15770.1…
10	136408783	136408790	+	136408790	intergenic	MSTRG.15770;MSTRG.15784	136050310-136549919;136263893-136505087	MSTRG.15770.1(136050310:136549833);MSTRG.15770.2(136050476:136179753);Zm00001d026018_T003(136174872:136179753);Zm00001d026018_T002(136174872:136179161);Zm00001d026018_T001(136174872:136179161);MSTRG.15770.6(136175017:136179666);Zm00001d026018_T004(136175102:136179753);Zm00001d026018_T005(136175735:136179753);MSTRG.15770.9(136542456:136549919);Zm00001d026036_T001(136545479:136549919);MSTRG.15770.1…
10	136408840	136408840	+	136408840	intergenic	MSTRG.15770;MSTRG.15784	136050310-136549919;136263893-136505087	MSTRG.15770.1(136050310:136549833);MSTRG.15770.2(136050476:136179753);Zm00001d026018_T003(136174872:136179753);Zm00001d026018_T002(136174872:136179161);Zm00001d026018_T001(136174872:136179161);MSTRG.15770.6(136175017:136179666);Zm00001d026018_T004(136175102:136179753);Zm00001d026018_T005(136175735:136179753);MSTRG.15770.9(136542456:136549919);Zm00001d026036_T001(136545479:136549919);MSTRG.15770.1…
10	136482798	136482798	+	136482798	intergenic	MSTRG.15770;MSTRG.15784	136050310-136549919;136263893-136505087	MSTRG.15770.1(136050310:136549833);MSTRG.15770.2(136050476:136179753);Zm00001d026018_T003(136174872:136179753);Zm00001d026018_T002(136174872:136179161);Zm00001d026018_T001(136174872:136179161);MSTRG.15770.6(136175017:136179666);Zm00001d026018_T004(136175102:136179753);Zm00001d026018_T005(136175735:136179753);MSTRG.15770.9(136542456:136549919);Zm00001d026036_T001(136545479:136549919);MSTRG.15770.1…
10	136483767	136483767	+	136483767	intergenic	MSTRG.15770;MSTRG.15784	136050310-136549919;136263893-136505087	MSTRG.15770.1(136050310:136549833);MSTRG.15770.2(136050476:136179753);Zm00001d026018_T003(136174872:136179753);Zm00001d026018_T002(136174872:136179161);Zm00001d026018_T001(136174872:136179161);MSTRG.15770.6(136175017:136179666);Zm00001d026018_T004(136175102:136179753);Zm00001d026018_T005(136175735:136179753);MSTRG.15770.9(136542456:136549919);Zm00001d026036_T001(136545479:136549919);MSTRG.15770.1…
10	137557365	137557365	+	137557365	intergenic	MSTRG.15856	137556975-137557368	MSTRG.15856.1(137556975:137557368)
10	137912934	137912983	+	137912950	intergenic	MSTRG.15864	137912109-137913456	MSTRG.15864.1(137912109:137913456)
10	137913070	137913072	+	137913072	intergenic	MSTRG.15864	137912109-137913456	MSTRG.15864.1(137912109:137913456)
10	137913136	137913162	+	137913156	intergenic	MSTRG.15864	137912109-137913456	MSTRG.15864.1(137912109:137913456)
10	137913294	137913314	+	137913294	intergenic	MSTRG.15864	137912109-137913456	MSTRG.15864.1(137912109:137913456)
10	137913394	137913417	+	137913394	intergenic	MSTRG.15864	137912109-137913456	MSTRG.15864.1(137912109:137913456)
10	138871531	138871531	+	138871531	intergenic	MSTRG.15915	138871131-138873080	MSTRG.15915.1(138871131:138873080)
10	138881210	138881230	+	138881210	intergenic	MSTRG.15916	138878081-138881776	MSTRG.15916.1(138878081:138881776);MSTRG.15916.2(138878102:138881679);MSTRG.15916.3(138878148:138881648);MSTRG.15916.4(138878148:138881648);MSTRG.15916.5(138878176:138881679);MSTRG.15916.6(138878196:138881458)
10	138881303	138881303	+	138881303	intergenic	MSTRG.15916	138878081-138881776	MSTRG.15916.1(138878081:138881776);MSTRG.15916.2(138878102:138881679);MSTRG.15916.3(138878148:138881648);MSTRG.15916.4(138878148:138881648);MSTRG.15916.5(138878176:138881679);MSTRG.15916.6(138878196:138881458)
10	139805113	139805113	+	139805113	intergenic	MSTRG.15963	139804104-139805147	MSTRG.15963.1(139804104:139805147)
10	140168892	140169048	+	140168992	intergenic	MSTRG.15983	140119120-140226946	MSTRG.15983.1(140119120:140146820);MSTRG.15983.2(140119189:140146819);MSTRG.15983.3(140119191:140146819);MSTRG.15983.4(140119191:140146751);MSTRG.15983.5(140119284:140146819);MSTRG.15983.6(140119311:140226946);MSTRG.15983.7(140119313:140146815);MSTRG.15983.8(140119315:140146820);MSTRG.15983.9(140142955:140174965);Zm00001d026165_T001(140169659:140174893);Zm00001d026165_T002(140169659:140174905);Zm…
10	140169171	140169173	+	140169171	intergenic	MSTRG.15983	140119120-140226946	MSTRG.15983.1(140119120:140146820);MSTRG.15983.2(140119189:140146819);MSTRG.15983.3(140119191:140146819);MSTRG.15983.4(140119191:140146751);MSTRG.15983.5(140119284:140146819);MSTRG.15983.6(140119311:140226946);MSTRG.15983.7(140119313:140146815);MSTRG.15983.8(140119315:140146820);MSTRG.15983.9(140142955:140174965);Zm00001d026165_T001(140169659:140174893);Zm00001d026165_T002(140169659:140174905);Zm…
10	140224674	140224674	+	140224674	intergenic	MSTRG.15983	140119120-140226946	MSTRG.15983.1(140119120:140146820);MSTRG.15983.2(140119189:140146819);MSTRG.15983.3(140119191:140146819);MSTRG.15983.4(140119191:140146751);MSTRG.15983.5(140119284:140146819);MSTRG.15983.6(140119311:140226946);MSTRG.15983.7(140119313:140146815);MSTRG.15983.8(140119315:140146820);MSTRG.15983.9(140142955:140174965);Zm00001d026165_T001(140169659:140174893);Zm00001d026165_T002(140169659:140174905);Zm…
10	141488631	141488631	+	141488631	intergenic	MSTRG.16055	141440243-141489986	MSTRG.16055.1(141440243:141489986);MSTRG.16055.2(141455473:141488951);MSTRG.16055.3(141455595:141488889);MSTRG.16055.4(141455631:141489733);Zm00001d026224_T001(141455631:141456351);MSTRG.16055.6(141455643:141488673);Zm00001d026224_T002(141455717:141456217)
10	141743575	141743597	+	141743595	intergenic	MSTRG.16085	141742730-141743612	MSTRG.16085.1(141742730:141743612)
10	142359392	142359392	+	142359392	intergenic	MSTRG.16125	142359109-142359582	MSTRG.16125.1(142359109:142359582)
10	142450172	142450172	+	142450172	intergenic	MSTRG.16136	142449988-142456495	MSTRG.16136.1(142449988:142456495)
10	143363483	143363483	+	143363483	intergenic	MSTRG.16216	143361789-143369286	MSTRG.16216.1(143361789:143369255);MSTRG.16216.2(143361789:143364570);Zm00001d026310_T001(143361789:143362886);MSTRG.16216.4(143361866:143365165);MSTRG.16216.5(143365312:143369286);Zm00001d026311_T002(143365795:143369286);Zm00001d026311_T001(143365795:143369286);Zm00001d026311_T004(143365799:143369117);Zm00001d026311_T003(143365799:143369117);Zm00001d026311_T005(143365799:143369132)
10	143363895	143363895	+	143363895	intergenic	MSTRG.16216	143361789-143369286	MSTRG.16216.1(143361789:143369255);MSTRG.16216.2(143361789:143364570);Zm00001d026310_T001(143361789:143362886);MSTRG.16216.4(143361866:143365165);MSTRG.16216.5(143365312:143369286);Zm00001d026311_T002(143365795:143369286);Zm00001d026311_T001(143365795:143369286);Zm00001d026311_T004(143365799:143369117);Zm00001d026311_T003(143365799:143369117);Zm00001d026311_T005(143365799:143369132)
10	143569948	143569967	+	143569950	intergenic	MSTRG.16229;MSTRG.16230	143567128-143644255;143569159-143572556	MSTRG.16229.1(143567128:143644144);MSTRG.16229.2(143613180:143644255);Zm00001d026331_T006(143632251:143644255);Zm00001d026331_T007(143632251:143644255);Zm00001d026331_T008(143632251:143644255);Zm00001d026331_T003(143632251:143643956);Zm00001d026331_T005(143632251:143644255);Zm00001d026331_T009(143632253:143644253);Zm00001d026331_T014(143632256:143644199);Zm00001d026331_T011(143632256:143643956);Z…
10	143572542	143572555	+	143572542	intergenic	MSTRG.16229;MSTRG.16230	143567128-143644255;143569159-143572556	MSTRG.16229.1(143567128:143644144);MSTRG.16229.2(143613180:143644255);Zm00001d026331_T006(143632251:143644255);Zm00001d026331_T007(143632251:143644255);Zm00001d026331_T008(143632251:143644255);Zm00001d026331_T003(143632251:143643956);Zm00001d026331_T005(143632251:143644255);Zm00001d026331_T009(143632253:143644253);Zm00001d026331_T014(143632256:143644199);Zm00001d026331_T011(143632256:143643956);Z…
10	143572584	143572584	+	143572584	intergenic	MSTRG.16229	143567128-143644255	MSTRG.16229.1(143567128:143644144);MSTRG.16229.2(143613180:143644255);Zm00001d026331_T006(143632251:143644255);Zm00001d026331_T007(143632251:143644255);Zm00001d026331_T008(143632251:143644255);Zm00001d026331_T003(143632251:143643956);Zm00001d026331_T005(143632251:143644255);Zm00001d026331_T009(143632253:143644253);Zm00001d026331_T014(143632256:143644199);Zm00001d026331_T011(143632256:143643956);Z…
10	143623944	143623947	+	143623944	intergenic	MSTRG.16229;MSTRG.16240	143567128-143644255;143622488-143624059	MSTRG.16229.1(143567128:143644144);MSTRG.16229.2(143613180:143644255);Zm00001d026331_T006(143632251:143644255);Zm00001d026331_T007(143632251:143644255);Zm00001d026331_T008(143632251:143644255);Zm00001d026331_T003(143632251:143643956);Zm00001d026331_T005(143632251:143644255);Zm00001d026331_T009(143632253:143644253);Zm00001d026331_T014(143632256:143644199);Zm00001d026331_T011(143632256:143643956);Z…
10	143626468	143626468	+	143626468	intergenic	MSTRG.16229	143567128-143644255	MSTRG.16229.1(143567128:143644144);MSTRG.16229.2(143613180:143644255);Zm00001d026331_T006(143632251:143644255);Zm00001d026331_T007(143632251:143644255);Zm00001d026331_T008(143632251:143644255);Zm00001d026331_T003(143632251:143643956);Zm00001d026331_T005(143632251:143644255);Zm00001d026331_T009(143632253:143644253);Zm00001d026331_T014(143632256:143644199);Zm00001d026331_T011(143632256:143643956);Z…
10	143626496	143626511	+	143626511	intergenic	MSTRG.16229	143567128-143644255	MSTRG.16229.1(143567128:143644144);MSTRG.16229.2(143613180:143644255);Zm00001d026331_T006(143632251:143644255);Zm00001d026331_T007(143632251:143644255);Zm00001d026331_T008(143632251:143644255);Zm00001d026331_T003(143632251:143643956);Zm00001d026331_T005(143632251:143644255);Zm00001d026331_T009(143632253:143644253);Zm00001d026331_T014(143632256:143644199);Zm00001d026331_T011(143632256:143643956);Z…
10	143647597	143647597	+	143647597	intergenic	MSTRG.16248	143645354-143647657	MSTRG.16248.1(143645354:143647657);MSTRG.16248.2(143645354:143647657);MSTRG.16248.3(143645354:143647597);MSTRG.16248.4(143645384:143647623);MSTRG.16248.5(143645384:143647597);MSTRG.16248.6(143645386:143647599)
10	144095950	144095950	+	144095950	intergenic	MSTRG.16276	144090785-144097760	MSTRG.16276.1(144090785:144097760);MSTRG.16276.2(144091288:144097720);Zm00001d026350_T001(144091288:144093948);MSTRG.16276.4(144095495:144097652);MSTRG.16276.5(144095980:144097749)
10	144097626	144097658	+	144097626	intergenic	MSTRG.16276	144090785-144097760	MSTRG.16276.1(144090785:144097760);MSTRG.16276.2(144091288:144097720);Zm00001d026350_T001(144091288:144093948);MSTRG.16276.4(144095495:144097652);MSTRG.16276.5(144095980:144097749)
10	144097686	144097716	+	144097709	intergenic	MSTRG.16276	144090785-144097760	MSTRG.16276.1(144090785:144097760);MSTRG.16276.2(144091288:144097720);Zm00001d026350_T001(144091288:144093948);MSTRG.16276.4(144095495:144097652);MSTRG.16276.5(144095980:144097749)
10	144118837	144118837	+	144118837	intergenic	MSTRG.16281	144118554-144119149	MSTRG.16281.1(144118554:144119149)
10	144156698	144156698	+	144156698	intergenic	MSTRG.16285	144156047-144157115	MSTRG.16285.1(144156047:144157115)
10	144718106	144718339	+	144718215	intergenic	MSTRG.16332	144645770-144744963	MSTRG.16332.1(144645770:144718324);MSTRG.16332.2(144717260:144718426);MSTRG.16332.3(144717268:144744963);MSTRG.16332.4(144717269:144718319)
10	144718370	144718371	+	144718371	intergenic	MSTRG.16332	144645770-144744963	MSTRG.16332.1(144645770:144718324);MSTRG.16332.2(144717260:144718426);MSTRG.16332.3(144717268:144744963);MSTRG.16332.4(144717269:144718319)
10	144718496	144718498	+	144718498	intergenic	MSTRG.16332	144645770-144744963	MSTRG.16332.1(144645770:144718324);MSTRG.16332.2(144717260:144718426);MSTRG.16332.3(144717268:144744963);MSTRG.16332.4(144717269:144718319)
10	144718629	144718629	+	144718629	intergenic	MSTRG.16332	144645770-144744963	MSTRG.16332.1(144645770:144718324);MSTRG.16332.2(144717260:144718426);MSTRG.16332.3(144717268:144744963);MSTRG.16332.4(144717269:144718319)
10	144718748	144718759	+	144718748	intergenic	MSTRG.16332	144645770-144744963	MSTRG.16332.1(144645770:144718324);MSTRG.16332.2(144717260:144718426);MSTRG.16332.3(144717268:144744963);MSTRG.16332.4(144717269:144718319)
10	144718787	144718814	+	144718808	intergenic	MSTRG.16332	144645770-144744963	MSTRG.16332.1(144645770:144718324);MSTRG.16332.2(144717260:144718426);MSTRG.16332.3(144717268:144744963);MSTRG.16332.4(144717269:144718319)
10	144718876	144718897	+	144718896	intergenic	MSTRG.16332	144645770-144744963	MSTRG.16332.1(144645770:144718324);MSTRG.16332.2(144717260:144718426);MSTRG.16332.3(144717268:144744963);MSTRG.16332.4(144717269:144718319)
10	144727787	144727808	+	144727807	intergenic	MSTRG.16332	144645770-144744963	MSTRG.16332.1(144645770:144718324);MSTRG.16332.2(144717260:144718426);MSTRG.16332.3(144717268:144744963);MSTRG.16332.4(144717269:144718319)
10	144727833	144727833	+	144727833	intergenic	MSTRG.16332	144645770-144744963	MSTRG.16332.1(144645770:144718324);MSTRG.16332.2(144717260:144718426);MSTRG.16332.3(144717268:144744963);MSTRG.16332.4(144717269:144718319)
10	144823064	144823064	+	144823064	intergenic	MSTRG.16342	144817277-144827336	MSTRG.16342.1(144817277:144823372);MSTRG.16342.2(144817277:144827200);MSTRG.16342.3(144817277:144823285);MSTRG.16342.4(144817277:144823310);MSTRG.16342.5(144817331:144823304);MSTRG.16342.6(144817331:144823302);MSTRG.16342.7(144817352:144823310);MSTRG.16342.8(144817352:144823372);MSTRG.16342.9(144817355:144823372);MSTRG.16342.10(144817360:144823310);MSTRG.16342.11(144818282:144823276);Zm00001d0263…
10	144823091	144823091	+	144823091	intergenic	MSTRG.16342	144817277-144827336	MSTRG.16342.1(144817277:144823372);MSTRG.16342.2(144817277:144827200);MSTRG.16342.3(144817277:144823285);MSTRG.16342.4(144817277:144823310);MSTRG.16342.5(144817331:144823304);MSTRG.16342.6(144817331:144823302);MSTRG.16342.7(144817352:144823310);MSTRG.16342.8(144817352:144823372);MSTRG.16342.9(144817355:144823372);MSTRG.16342.10(144817360:144823310);MSTRG.16342.11(144818282:144823276);Zm00001d0263…
10	144823119	144823124	+	144823124	intergenic	MSTRG.16342	144817277-144827336	MSTRG.16342.1(144817277:144823372);MSTRG.16342.2(144817277:144827200);MSTRG.16342.3(144817277:144823285);MSTRG.16342.4(144817277:144823310);MSTRG.16342.5(144817331:144823304);MSTRG.16342.6(144817331:144823302);MSTRG.16342.7(144817352:144823310);MSTRG.16342.8(144817352:144823372);MSTRG.16342.9(144817355:144823372);MSTRG.16342.10(144817360:144823310);MSTRG.16342.11(144818282:144823276);Zm00001d0263…
10	144823172	144823280	+	144823279	intergenic	MSTRG.16342	144817277-144827336	MSTRG.16342.1(144817277:144823372);MSTRG.16342.2(144817277:144827200);MSTRG.16342.3(144817277:144823285);MSTRG.16342.4(144817277:144823310);MSTRG.16342.5(144817331:144823304);MSTRG.16342.6(144817331:144823302);MSTRG.16342.7(144817352:144823310);MSTRG.16342.8(144817352:144823372);MSTRG.16342.9(144817355:144823372);MSTRG.16342.10(144817360:144823310);MSTRG.16342.11(144818282:144823276);Zm00001d0263…
10	144823610	144823610	+	144823610	intergenic	MSTRG.16342	144817277-144827336	MSTRG.16342.1(144817277:144823372);MSTRG.16342.2(144817277:144827200);MSTRG.16342.3(144817277:144823285);MSTRG.16342.4(144817277:144823310);MSTRG.16342.5(144817331:144823304);MSTRG.16342.6(144817331:144823302);MSTRG.16342.7(144817352:144823310);MSTRG.16342.8(144817352:144823372);MSTRG.16342.9(144817355:144823372);MSTRG.16342.10(144817360:144823310);MSTRG.16342.11(144818282:144823276);Zm00001d0263…
10	144893766	144893766	+	144893766	intergenic	MSTRG.16348	144881978-145020799	MSTRG.16348.1(144881978:144940041);Zm00001d026387_T001(144881978:144891638);MSTRG.16348.3(144881982:144894155);MSTRG.16348.4(144881982:144945342);MSTRG.16348.5(144881982:144945356);MSTRG.16348.6(144881982:144945327);MSTRG.16348.7(144881982:144945315);MSTRG.16348.8(144881982:144890708);MSTRG.16348.9(144881982:144945342);Zm00001d026387_T002(144881982:144883102);MSTRG.16348.11(144881982:144945303);M…
10	144895616	144895616	+	144895616	intergenic	MSTRG.16348	144881978-145020799	MSTRG.16348.1(144881978:144940041);Zm00001d026387_T001(144881978:144891638);MSTRG.16348.3(144881982:144894155);MSTRG.16348.4(144881982:144945342);MSTRG.16348.5(144881982:144945356);MSTRG.16348.6(144881982:144945327);MSTRG.16348.7(144881982:144945315);MSTRG.16348.8(144881982:144890708);MSTRG.16348.9(144881982:144945342);Zm00001d026387_T002(144881982:144883102);MSTRG.16348.11(144881982:144945303);M…
10	144991563	144991563	+	144991563	intergenic	MSTRG.16348;MSTRG.16355	144881978-145020799;144990628-144991864	MSTRG.16348.1(144881978:144940041);Zm00001d026387_T001(144881978:144891638);MSTRG.16348.3(144881982:144894155);MSTRG.16348.4(144881982:144945342);MSTRG.16348.5(144881982:144945356);MSTRG.16348.6(144881982:144945327);MSTRG.16348.7(144881982:144945315);MSTRG.16348.8(144881982:144890708);MSTRG.16348.9(144881982:144945342);Zm00001d026387_T002(144881982:144883102);MSTRG.16348.11(144881982:144945303);M…
10	144991700	144991700	+	144991700	intergenic	MSTRG.16348;MSTRG.16355	144881978-145020799;144990628-144991864	MSTRG.16348.1(144881978:144940041);Zm00001d026387_T001(144881978:144891638);MSTRG.16348.3(144881982:144894155);MSTRG.16348.4(144881982:144945342);MSTRG.16348.5(144881982:144945356);MSTRG.16348.6(144881982:144945327);MSTRG.16348.7(144881982:144945315);MSTRG.16348.8(144881982:144890708);MSTRG.16348.9(144881982:144945342);Zm00001d026387_T002(144881982:144883102);MSTRG.16348.11(144881982:144945303);M…
10	145449091	145449202	+	145449105	intergenic	MSTRG.16396	145446348-145450747	MSTRG.16396.1(145446348:145449708);MSTRG.16396.2(145446372:145450747);MSTRG.16396.3(145446372:145450747);MSTRG.16396.4(145446377:145450695);MSTRG.16396.5(145446415:145450693);MSTRG.16396.6(145446421:145450680);MSTRG.16396.7(145446430:145450717);MSTRG.16396.8(145446430:145449768);MSTRG.16396.9(145446438:145449658);MSTRG.16396.10(145446443:145450642);MSTRG.16396.11(145446449:145450629);MSTRG.16396.…
10	146331282	146331291	+	146331291	intergenic	MSTRG.16475;MSTRG.16476	146328438-146399259;146329410-146331412	MSTRG.16475.1(146328438:146399259);MSTRG.16476.1(146329410:146331303);MSTRG.16476.2(146329501:146331412)
10	146388659	146388659	+	146388659	intergenic	MSTRG.16475	146328438-146399259	MSTRG.16475.1(146328438:146399259)
10	148162857	148162884	+	148162882	intergenic	MSTRG.16635	148161518-148210219	MSTRG.16635.1(148161518:148210219)
10	148202892	148202892	+	148202892	intergenic	MSTRG.16635;MSTRG.16643	148161518-148210219;148189977-148269901	MSTRG.16635.1(148161518:148210219);MSTRG.16643.1(148189977:148269901)
10	148714028	148714028	+	148714028	intergenic	MSTRG.16691	148710854-148785830	MSTRG.16691.1(148710854:148785830);Zm00001d026598_T001(148710854:148712556);MSTRG.16691.3(148710867:148712556);MSTRG.16691.4(148710892:148712575)
10	148913020	148913020	+	148913020	intergenic	MSTRG.16707	148901809-148959403	Zm00001d026606_T001(148901809:148903746);MSTRG.16707.2(148901826:148959403);Zm00001d026606_T002(148901826:148903746)
10	148923141	148923201	+	148923141	intergenic	MSTRG.16707;MSTRG.16711	148901809-148959403;148913230-148927205	Zm00001d026606_T001(148901809:148903746);MSTRG.16707.2(148901826:148959403);Zm00001d026606_T002(148901826:148903746);MSTRG.16711.1(148913230:148927205);Zm00001d026608_T001(148913230:148914804)
10	149050903	149050903	+	149050903	intergenic	MSTRG.16727	149049368-149053617	MSTRG.16727.1(149049368:149053617)
10	149356415	149356415	+	149356415	intergenic	MSTRG.16767;MSTRG.16774	149307355-149392881;149355576-149358563	MSTRG.16767.1(149307355:149392881);MSTRG.16767.2(149391978:149392866);Zm00001d026651_T001(149391978:149392502);MSTRG.16774.1(149355576:149358563)
10	149358472	149358486	+	149358486	intergenic	MSTRG.16767;MSTRG.16774	149307355-149392881;149355576-149358563	MSTRG.16767.1(149307355:149392881);MSTRG.16767.2(149391978:149392866);Zm00001d026651_T001(149391978:149392502);MSTRG.16774.1(149355576:149358563)
10	149358558	149358558	+	149358558	intergenic	MSTRG.16767;MSTRG.16774	149307355-149392881;149355576-149358563	MSTRG.16767.1(149307355:149392881);MSTRG.16767.2(149391978:149392866);Zm00001d026651_T001(149391978:149392502);MSTRG.16774.1(149355576:149358563)
10	149624170	149624170	+	149624170	intergenic	MSTRG.16802	149622929-149624487	MSTRG.16802.1(149622929:149624487)
10	149626677	149626677	+	149626677	intergenic	MSTRG.16804	149625486-149651848	MSTRG.16804.1(149625486:149632222);MSTRG.16804.2(149625581:149651848)
10	149628530	149628580	+	149628561	intergenic	MSTRG.16804	149625486-149651848	MSTRG.16804.1(149625486:149632222);MSTRG.16804.2(149625581:149651848)
10	149628641	149628665	+	149628641	intergenic	MSTRG.16804	149625486-149651848	MSTRG.16804.1(149625486:149632222);MSTRG.16804.2(149625581:149651848)
10	149628719	149628736	+	149628721	intergenic	MSTRG.16804	149625486-149651848	MSTRG.16804.1(149625486:149632222);MSTRG.16804.2(149625581:149651848)
10	149628857	149628863	+	149628857	intergenic	MSTRG.16804	149625486-149651848	MSTRG.16804.1(149625486:149632222);MSTRG.16804.2(149625581:149651848)
10	149628906	149629027	+	149628989	intergenic	MSTRG.16804	149625486-149651848	MSTRG.16804.1(149625486:149632222);MSTRG.16804.2(149625581:149651848)
10	149629058	149629058	+	149629058	intergenic	MSTRG.16804	149625486-149651848	MSTRG.16804.1(149625486:149632222);MSTRG.16804.2(149625581:149651848)
10	149629177	149629177	+	149629177	intergenic	MSTRG.16804	149625486-149651848	MSTRG.16804.1(149625486:149632222);MSTRG.16804.2(149625581:149651848)
10	149629670	149629670	+	149629670	intergenic	MSTRG.16804	149625486-149651848	MSTRG.16804.1(149625486:149632222);MSTRG.16804.2(149625581:149651848)
10	149631433	149631433	+	149631433	intergenic	MSTRG.16804	149625486-149651848	MSTRG.16804.1(149625486:149632222);MSTRG.16804.2(149625581:149651848)
10	149631496	149631505	+	149631496	intergenic	MSTRG.16804	149625486-149651848	MSTRG.16804.1(149625486:149632222);MSTRG.16804.2(149625581:149651848)
10	149631557	149631575	+	149631557	intergenic	MSTRG.16804	149625486-149651848	MSTRG.16804.1(149625486:149632222);MSTRG.16804.2(149625581:149651848)
10	149631898	149631898	+	149631898	intergenic	MSTRG.16804	149625486-149651848	MSTRG.16804.1(149625486:149632222);MSTRG.16804.2(149625581:149651848)
10	149632124	149632135	+	149632124	intergenic	MSTRG.16804	149625486-149651848	MSTRG.16804.1(149625486:149632222);MSTRG.16804.2(149625581:149651848)
10	149632165	149632205	+	149632205	intergenic	MSTRG.16804	149625486-149651848	MSTRG.16804.1(149625486:149632222);MSTRG.16804.2(149625581:149651848)
10	149651456	149651501	+	149651456	intergenic	MSTRG.16804	149625486-149651848	MSTRG.16804.1(149625486:149632222);MSTRG.16804.2(149625581:149651848)
10	149651565	149651592	+	149651565	intergenic	MSTRG.16804	149625486-149651848	MSTRG.16804.1(149625486:149632222);MSTRG.16804.2(149625581:149651848)
10	149651618	149651646	+	149651641	intergenic	MSTRG.16804	149625486-149651848	MSTRG.16804.1(149625486:149632222);MSTRG.16804.2(149625581:149651848)
10	149651815	149651821	+	149651815	intergenic	MSTRG.16804	149625486-149651848	MSTRG.16804.1(149625486:149632222);MSTRG.16804.2(149625581:149651848)
10	149653003	149653003	+	149653003	intergenic	MSTRG.16811	149652723-149656165	MSTRG.16811.1(149652723:149656165)
10	150122833	150122833	+	150122833	intergenic	MSTRG.16844	150122011-150143184	MSTRG.16844.1(150122011:150143171);MSTRG.16844.2(150122075:150126133);Zm00001d026695_T001(150135232:150143184);Zm00001d026695_T002(150135338:150143167)
1	572798	572798	-	572798	intergenic	MSTRG.787	560956-573441	Zm00001d027257_T001(560956:568038);Zm00001d027257_T002(560958:568038);MSTRG.787.3(560971:573394);Zm00001d027257_T003(560971:565173);MSTRG.787.5(560973:573436);Zm00001d027257_T005(560973:566685);Zm00001d027257_T006(560997:565548);MSTRG.787.8(560998:573441);MSTRG.787.9(560998:573440);MSTRG.787.10(560998:573398);Zm00001d027257_T007(560998:567406);Zm00001d027257_T008(561006:567285)
1	572874	572874	-	572874	intergenic	MSTRG.787	560956-573441	Zm00001d027257_T001(560956:568038);Zm00001d027257_T002(560958:568038);MSTRG.787.3(560971:573394);Zm00001d027257_T003(560971:565173);MSTRG.787.5(560973:573436);Zm00001d027257_T005(560973:566685);Zm00001d027257_T006(560997:565548);MSTRG.787.8(560998:573441);MSTRG.787.9(560998:573440);MSTRG.787.10(560998:573398);Zm00001d027257_T007(560998:567406);Zm00001d027257_T008(561006:567285)
1	572903	572920	-	572920	intergenic	MSTRG.787	560956-573441	Zm00001d027257_T001(560956:568038);Zm00001d027257_T002(560958:568038);MSTRG.787.3(560971:573394);Zm00001d027257_T003(560971:565173);MSTRG.787.5(560973:573436);Zm00001d027257_T005(560973:566685);Zm00001d027257_T006(560997:565548);MSTRG.787.8(560998:573441);MSTRG.787.9(560998:573440);MSTRG.787.10(560998:573398);Zm00001d027257_T007(560998:567406);Zm00001d027257_T008(561006:567285)
1	1207612	1207612	-	1207612	intergenic	MSTRG.808	1207532-1213751	MSTRG.808.1(1207532:1213751);MSTRG.808.2(1207543:1213743);MSTRG.808.3(1207545:1213742);MSTRG.808.4(1207545:1211495);MSTRG.808.5(1207563:1213750);MSTRG.808.6(1207573:1213747);MSTRG.808.7(1207573:1213747);MSTRG.808.8(1207573:1213747);MSTRG.808.9(1207574:1213742);MSTRG.808.10(1207574:1213742);MSTRG.808.11(1207606:1213739);MSTRG.808.12(1207611:1213714);MSTRG.808.13(1207622:1213751)
1	1488465	1488465	-	1488465	intergenic	MSTRG.818	1488205-1491911	MSTRG.818.1(1488205:1491911)
1	1488945	1488945	-	1488945	intergenic	MSTRG.818	1488205-1491911	MSTRG.818.1(1488205:1491911)
1	1919285	1919285	-	1919285	intergenic	MSTRG.833;MSTRG.835	1841722-2106562;1918444-1921881	MSTRG.833.1(1841722:1843589);MSTRG.833.2(1841722:2106484);Zm00001d027288_T001(1841722:1843589);MSTRG.833.4(1841722:1843589);MSTRG.833.5(1841725:1887110);MSTRG.833.6(1841731:1843589);MSTRG.833.7(1841822:1843589);MSTRG.833.8(1841833:1865907);ENSRNA049464979-T1(1842786:1842883);MSTRG.833.10(2053442:2106562);MSTRG.833.11(2101312:2106483);MSTRG.835.1(1918444:1921881);Zm00001d022652_T001(1918444:191864…
1	3291907	3291907	-	3291907	intergenic	MSTRG.933	3291834-3380211	MSTRG.933.1(3291834:3294687);MSTRG.933.2(3291916:3380211);MSTRG.933.3(3291924:3294680);MSTRG.933.4(3292223:3294685);MSTRG.933.5(3292223:3294685);MSTRG.933.6(3292223:3294685);Zm00001d027342_T002(3292884:3294726);Zm00001d027342_T001(3292884:3294546)
1	3377228	3377228	-	3377228	intergenic	MSTRG.933	3291834-3380211	MSTRG.933.1(3291834:3294687);MSTRG.933.2(3291916:3380211);MSTRG.933.3(3291924:3294680);MSTRG.933.4(3292223:3294685);MSTRG.933.5(3292223:3294685);MSTRG.933.6(3292223:3294685);Zm00001d027342_T002(3292884:3294726);Zm00001d027342_T001(3292884:3294546)
1	3965057	3965101	-	3965059	intergenic	MSTRG.994	3964965-3968357	MSTRG.994.1(3964965:3968357);MSTRG.994.2(3965058:3968357);Zm00001d027374_T001(3966724:3968357);Zm00001d027374_T002(3966724:3968357)
1	3965127	3965137	-	3965130	intergenic	MSTRG.994	3964965-3968357	MSTRG.994.1(3964965:3968357);MSTRG.994.2(3965058:3968357);Zm00001d027374_T001(3966724:3968357);Zm00001d027374_T002(3966724:3968357)
1	3965168	3965258	-	3965227	intergenic	MSTRG.994	3964965-3968357	MSTRG.994.1(3964965:3968357);MSTRG.994.2(3965058:3968357);Zm00001d027374_T001(3966724:3968357);Zm00001d027374_T002(3966724:3968357)
1	4142113	4142200	-	4142177	intergenic	MSTRG.1016	4141993-4167343	MSTRG.1016.1(4141993:4167343);Zm00001d027389_T001(4149732:4149992)
1	4142292	4142475	-	4142341	intergenic	MSTRG.1016	4141993-4167343	MSTRG.1016.1(4141993:4167343);Zm00001d027389_T001(4149732:4149992)
1	4893038	4893038	-	4893038	intergenic	MSTRG.1058	4892694-4894868	MSTRG.1058.1(4892694:4894868)
1	5525121	5525121	-	5525121	intergenic	MSTRG.1116	5524476-5526597	MSTRG.1116.1(5524476:5526597)
1	6539430	6539430	-	6539430	intergenic	MSTRG.1190	6539412-6618999	MSTRG.1190.1(6539412:6618999);MSTRG.1190.2(6539539:6582788);MSTRG.1190.3(6539624:6574205);MSTRG.1190.4(6539643:6543117);Zm00001d027493_T001(6542791:6543117)
1	6539493	6539688	-	6539620	intergenic	MSTRG.1190	6539412-6618999	MSTRG.1190.1(6539412:6618999);MSTRG.1190.2(6539539:6582788);MSTRG.1190.3(6539624:6574205);MSTRG.1190.4(6539643:6543117);Zm00001d027493_T001(6542791:6543117)
1	6539748	6539758	-	6539750	intergenic	MSTRG.1190	6539412-6618999	MSTRG.1190.1(6539412:6618999);MSTRG.1190.2(6539539:6582788);MSTRG.1190.3(6539624:6574205);MSTRG.1190.4(6539643:6543117);Zm00001d027493_T001(6542791:6543117)
1	6771073	6771073	-	6771073	intergenic	MSTRG.1197	6739297-6798578	MSTRG.1197.1(6739297:6798578);MSTRG.1197.2(6767529:6798501)
1	7074405	7074428	-	7074428	intergenic	MSTRG.1221	7074395-7084239	MSTRG.1221.1(7074395:7079979);MSTRG.1221.2(7074395:7079936);MSTRG.1221.3(7074403:7079956);MSTRG.1221.4(7074408:7084239);MSTRG.1221.5(7074408:7079852);MSTRG.1221.6(7074410:7079957);MSTRG.1221.7(7074441:7079865);MSTRG.1221.8(7074448:7079888);Zm00001d027510_T001(7075161:7079887);Zm00001d027510_T002(7075461:7079203)
1	7074457	7074465	-	7074457	intergenic	MSTRG.1221	7074395-7084239	MSTRG.1221.1(7074395:7079979);MSTRG.1221.2(7074395:7079936);MSTRG.1221.3(7074403:7079956);MSTRG.1221.4(7074408:7084239);MSTRG.1221.5(7074408:7079852);MSTRG.1221.6(7074410:7079957);MSTRG.1221.7(7074441:7079865);MSTRG.1221.8(7074448:7079888);Zm00001d027510_T001(7075161:7079887);Zm00001d027510_T002(7075461:7079203)
1	7074491	7074491	-	7074491	intergenic	MSTRG.1221	7074395-7084239	MSTRG.1221.1(7074395:7079979);MSTRG.1221.2(7074395:7079936);MSTRG.1221.3(7074403:7079956);MSTRG.1221.4(7074408:7084239);MSTRG.1221.5(7074408:7079852);MSTRG.1221.6(7074410:7079957);MSTRG.1221.7(7074441:7079865);MSTRG.1221.8(7074448:7079888);Zm00001d027510_T001(7075161:7079887);Zm00001d027510_T002(7075461:7079203)
1	7074524	7074536	-	7074536	intergenic	MSTRG.1221	7074395-7084239	MSTRG.1221.1(7074395:7079979);MSTRG.1221.2(7074395:7079936);MSTRG.1221.3(7074403:7079956);MSTRG.1221.4(7074408:7084239);MSTRG.1221.5(7074408:7079852);MSTRG.1221.6(7074410:7079957);MSTRG.1221.7(7074441:7079865);MSTRG.1221.8(7074448:7079888);Zm00001d027510_T001(7075161:7079887);Zm00001d027510_T002(7075461:7079203)
1	7074562	7074601	-	7074562	intergenic	MSTRG.1221	7074395-7084239	MSTRG.1221.1(7074395:7079979);MSTRG.1221.2(7074395:7079936);MSTRG.1221.3(7074403:7079956);MSTRG.1221.4(7074408:7084239);MSTRG.1221.5(7074408:7079852);MSTRG.1221.6(7074410:7079957);MSTRG.1221.7(7074441:7079865);MSTRG.1221.8(7074448:7079888);Zm00001d027510_T001(7075161:7079887);Zm00001d027510_T002(7075461:7079203)
1	7074658	7074670	-	7074670	intergenic	MSTRG.1221	7074395-7084239	MSTRG.1221.1(7074395:7079979);MSTRG.1221.2(7074395:7079936);MSTRG.1221.3(7074403:7079956);MSTRG.1221.4(7074408:7084239);MSTRG.1221.5(7074408:7079852);MSTRG.1221.6(7074410:7079957);MSTRG.1221.7(7074441:7079865);MSTRG.1221.8(7074448:7079888);Zm00001d027510_T001(7075161:7079887);Zm00001d027510_T002(7075461:7079203)
1	7563362	7563451	-	7563381	intergenic	MSTRG.1252	7559778-7564127	MSTRG.1252.1(7559778:7564127)
1	7563485	7563497	-	7563492	intergenic	MSTRG.1252	7559778-7564127	MSTRG.1252.1(7559778:7564127)
1	7563597	7563597	-	7563597	intergenic	MSTRG.1252	7559778-7564127	MSTRG.1252.1(7559778:7564127)
1	8035209	8035209	-	8035209	intergenic	MSTRG.1275	8017653-8055161	MSTRG.1275.1(8017653:8055136);MSTRG.1275.2(8017653:8019702);Zm00001d027546_T001(8017653:8019823);Zm00001d027549_T001(8053530:8055161)
1	8037858	8037858	-	8037858	intergenic	MSTRG.1275	8017653-8055161	MSTRG.1275.1(8017653:8055136);MSTRG.1275.2(8017653:8019702);Zm00001d027546_T001(8017653:8019823);Zm00001d027549_T001(8053530:8055161)
1	8038467	8038472	-	8038472	intergenic	MSTRG.1275	8017653-8055161	MSTRG.1275.1(8017653:8055136);MSTRG.1275.2(8017653:8019702);Zm00001d027546_T001(8017653:8019823);Zm00001d027549_T001(8053530:8055161)
1	8038627	8038627	-	8038627	intergenic	MSTRG.1275	8017653-8055161	MSTRG.1275.1(8017653:8055136);MSTRG.1275.2(8017653:8019702);Zm00001d027546_T001(8017653:8019823);Zm00001d027549_T001(8053530:8055161)
1	8038687	8038687	-	8038687	intergenic	MSTRG.1275	8017653-8055161	MSTRG.1275.1(8017653:8055136);MSTRG.1275.2(8017653:8019702);Zm00001d027546_T001(8017653:8019823);Zm00001d027549_T001(8053530:8055161)
1	8039980	8040055	-	8039991	intergenic	MSTRG.1275;MSTRG.1277	8017653-8055161;8039956-8040622	MSTRG.1275.1(8017653:8055136);MSTRG.1275.2(8017653:8019702);Zm00001d027546_T001(8017653:8019823);Zm00001d027549_T001(8053530:8055161);MSTRG.1277.1(8039956:8040622)
1	8108983	8108983	-	8108983	intergenic	MSTRG.1284	8108886-8336297	MSTRG.1284.1(8108886:8336273);MSTRG.1284.2(8108938:8336252);MSTRG.1284.3(8108938:8336195);MSTRG.1284.4(8108940:8111572);MSTRG.1284.5(8332990:8336297)
1	8114652	8114652	-	8114652	intergenic	MSTRG.1284	8108886-8336297	MSTRG.1284.1(8108886:8336273);MSTRG.1284.2(8108938:8336252);MSTRG.1284.3(8108938:8336195);MSTRG.1284.4(8108940:8111572);MSTRG.1284.5(8332990:8336297)
1	8128516	8128516	-	8128516	intergenic	MSTRG.1284	8108886-8336297	MSTRG.1284.1(8108886:8336273);MSTRG.1284.2(8108938:8336252);MSTRG.1284.3(8108938:8336195);MSTRG.1284.4(8108940:8111572);MSTRG.1284.5(8332990:8336297)
1	8128866	8128866	-	8128866	intergenic	MSTRG.1284	8108886-8336297	MSTRG.1284.1(8108886:8336273);MSTRG.1284.2(8108938:8336252);MSTRG.1284.3(8108938:8336195);MSTRG.1284.4(8108940:8111572);MSTRG.1284.5(8332990:8336297)
1	8152159	8152159	-	8152159	intergenic	MSTRG.1284	8108886-8336297	MSTRG.1284.1(8108886:8336273);MSTRG.1284.2(8108938:8336252);MSTRG.1284.3(8108938:8336195);MSTRG.1284.4(8108940:8111572);MSTRG.1284.5(8332990:8336297)
1	8243205	8243205	-	8243205	intergenic	MSTRG.1284	8108886-8336297	MSTRG.1284.1(8108886:8336273);MSTRG.1284.2(8108938:8336252);MSTRG.1284.3(8108938:8336195);MSTRG.1284.4(8108940:8111572);MSTRG.1284.5(8332990:8336297)
1	8333373	8333373	-	8333373	intergenic	MSTRG.1284	8108886-8336297	MSTRG.1284.1(8108886:8336273);MSTRG.1284.2(8108938:8336252);MSTRG.1284.3(8108938:8336195);MSTRG.1284.4(8108940:8111572);MSTRG.1284.5(8332990:8336297)
1	8979395	8979395	-	8979395	intergenic	MSTRG.1359	8979278-8979867	MSTRG.1359.1(8979278:8979867)
1	9160706	9160706	-	9160706	intergenic	MSTRG.1373	9160689-9163183	MSTRG.1373.1(9160689:9163183)
1	10257640	10257645	-	10257640	intergenic	MSTRG.1432	10257604-10258618	MSTRG.1432.1(10257604:10258618);MSTRG.1432.2(10257709:10258476)
1	11005305	11005305	-	11005305	intergenic	MSTRG.1468	11005214-11006033	MSTRG.1468.1(11005214:11006033)
1	12372052	12372068	-	12372068	intergenic	MSTRG.1544	12364466-12375047	MSTRG.1544.1(12364466:12374823);Zm00001d027732_T001(12364471:12371991);MSTRG.1544.3(12364505:12374946);MSTRG.1544.4(12364540:12375047)
1	12372128	12372128	-	12372128	intergenic	MSTRG.1544	12364466-12375047	MSTRG.1544.1(12364466:12374823);Zm00001d027732_T001(12364471:12371991);MSTRG.1544.3(12364505:12374946);MSTRG.1544.4(12364540:12375047)
1	12373805	12373808	-	12373805	intergenic	MSTRG.1544	12364466-12375047	MSTRG.1544.1(12364466:12374823);Zm00001d027732_T001(12364471:12371991);MSTRG.1544.3(12364505:12374946);MSTRG.1544.4(12364540:12375047)
1	12492483	12492483	-	12492483	intergenic	MSTRG.1560	12492217-12492955	MSTRG.1560.1(12492217:12492955)
1	12619486	12619486	-	12619486	intergenic	MSTRG.1571	12617925-12624989	MSTRG.1571.1(12617925:12624989);Zm00001d027751_T001(12621185:12624879)
1	13813329	13813358	-	13813331	intergenic	MSTRG.1627	13813288-13813695	MSTRG.1627.1(13813288:13813695)
1	13813410	13813422	-	13813410	intergenic	MSTRG.1627	13813288-13813695	MSTRG.1627.1(13813288:13813695)
1	15335611	15335634	-	15335615	intergenic	MSTRG.1711	15334308-15337966	MSTRG.1711.1(15334308:15337966);MSTRG.1711.2(15335763:15337932)
1	15335667	15335667	-	15335667	intergenic	MSTRG.1711	15334308-15337966	MSTRG.1711.1(15334308:15337966);MSTRG.1711.2(15335763:15337932)
1	15371004	15371009	-	15371004	intergenic	MSTRG.1712	15350212-15414274	MSTRG.1712.1(15350212:15414274)
1	15392625	15392625	-	15392625	intergenic	MSTRG.1712	15350212-15414274	MSTRG.1712.1(15350212:15414274)
1	16141520	16141520	-	16141520	intergenic	MSTRG.1753	16141113-16141568	MSTRG.1753.1(16141113:16141568)
1	16233495	16233499	-	16233496	intergenic	MSTRG.1756	16231842-16235086	MSTRG.1756.1(16231842:16235086);MSTRG.1756.2(16231842:16235086);MSTRG.1756.3(16233416:16235082)
1	20019094	20019119	-	20019117	intergenic	MSTRG.1946	20011228-20021112	MSTRG.1946.1(20011228:20021112);MSTRG.1946.2(20011346:20021012);MSTRG.1946.3(20011346:20021112);MSTRG.1946.4(20011358:20021079);MSTRG.1946.5(20011814:20021112)
1	20020656	20020659	-	20020659	intergenic	MSTRG.1946	20011228-20021112	MSTRG.1946.1(20011228:20021112);MSTRG.1946.2(20011346:20021012);MSTRG.1946.3(20011346:20021112);MSTRG.1946.4(20011358:20021079);MSTRG.1946.5(20011814:20021112)
1	20020730	20020730	-	20020730	intergenic	MSTRG.1946	20011228-20021112	MSTRG.1946.1(20011228:20021112);MSTRG.1946.2(20011346:20021012);MSTRG.1946.3(20011346:20021112);MSTRG.1946.4(20011358:20021079);MSTRG.1946.5(20011814:20021112)
1	20291273	20291273	-	20291273	intergenic	MSTRG.1959	20290999-20291614	MSTRG.1959.1(20290999:20291614)
1	20291403	20291426	-	20291426	intergenic	MSTRG.1959	20290999-20291614	MSTRG.1959.1(20290999:20291614)
1	21290415	21290415	-	21290415	intergenic	MSTRG.1997	21287200-21292118	MSTRG.1997.1(21287200:21292118);MSTRG.1997.2(21289722:21291967)
1	21902649	21902649	-	21902649	intergenic	MSTRG.2023	21842230-21937646	MSTRG.2023.1(21842230:21937646);MSTRG.2023.2(21842237:21860232);Zm00001d028062_T001(21842237:21860574);MSTRG.2023.4(21842246:21860502);Zm00001d028063_T001(21859906:21860232)
1	22878569	22878569	-	22878569	intergenic	MSTRG.2058	22878386-22878733	MSTRG.2058.1(22878386:22878733)
1	22878650	22878684	-	22878684	intergenic	MSTRG.2058	22878386-22878733	MSTRG.2058.1(22878386:22878733)
1	23558059	23558066	-	23558066	intergenic	MSTRG.2099	23557770-23562977	MSTRG.2099.1(23557770:23562977);MSTRG.2099.2(23557867:23562368);MSTRG.2099.3(23561220:23562928);MSTRG.2099.4(23561220:23562890);MSTRG.2099.5(23561220:23562943);Zm00001d028125_T001(23561220:23562368)
1	25759101	25759101	-	25759101	intergenic	MSTRG.2191	25755264-25759642	MSTRG.2191.1(25755264:25759642)
1	25759236	25759236	-	25759236	intergenic	MSTRG.2191	25755264-25759642	MSTRG.2191.1(25755264:25759642)
1	25760171	25760193	-	25760193	intergenic	MSTRG.2193	25760097-25767369	MSTRG.2193.1(25760097:25767369);Zm00001d028188_T001(25760320:25766860);Zm00001d028188_T002(25760368:25763745);Zm00001d028188_T003(25760379:25767012)
1	26603996	26604024	-	26603996	intergenic	MSTRG.2231	26603132-26609851	MSTRG.2231.1(26603132:26609851);MSTRG.2231.2(26603961:26609777);MSTRG.2231.3(26603969:26609768);Zm00001d028213_T001(26605799:26609755)
1	26604141	26604141	-	26604141	intergenic	MSTRG.2231	26603132-26609851	MSTRG.2231.1(26603132:26609851);MSTRG.2231.2(26603961:26609777);MSTRG.2231.3(26603969:26609768);Zm00001d028213_T001(26605799:26609755)
1	26604219	26604219	-	26604219	intergenic	MSTRG.2231	26603132-26609851	MSTRG.2231.1(26603132:26609851);MSTRG.2231.2(26603961:26609777);MSTRG.2231.3(26603969:26609768);Zm00001d028213_T001(26605799:26609755)
1	26604414	26604504	-	26604414	intergenic	MSTRG.2231	26603132-26609851	MSTRG.2231.1(26603132:26609851);MSTRG.2231.2(26603961:26609777);MSTRG.2231.3(26603969:26609768);Zm00001d028213_T001(26605799:26609755)
1	26604872	26604872	-	26604872	intergenic	MSTRG.2231	26603132-26609851	MSTRG.2231.1(26603132:26609851);MSTRG.2231.2(26603961:26609777);MSTRG.2231.3(26603969:26609768);Zm00001d028213_T001(26605799:26609755)
1	28834709	28834717	-	28834711	intergenic	MSTRG.2332	28834689-28835051	MSTRG.2332.1(28834689:28835051)
1	30540230	30540230	-	30540230	intergenic	MSTRG.2393	30540222-30541056	MSTRG.2393.1(30540222:30541056)
1	30611180	30611308	-	30611228	intergenic	MSTRG.2402	30610904-30614679	MSTRG.2402.1(30610904:30614679);MSTRG.2402.2(30610904:30614679)
1	30611651	30611651	-	30611651	intergenic	MSTRG.2402	30610904-30614679	MSTRG.2402.1(30610904:30614679);MSTRG.2402.2(30610904:30614679)
1	30611699	30611699	-	30611699	intergenic	MSTRG.2402	30610904-30614679	MSTRG.2402.1(30610904:30614679);MSTRG.2402.2(30610904:30614679)
1	30611739	30611739	-	30611739	intergenic	MSTRG.2402	30610904-30614679	MSTRG.2402.1(30610904:30614679);MSTRG.2402.2(30610904:30614679)
1	30611911	30611911	-	30611911	intergenic	MSTRG.2402	30610904-30614679	MSTRG.2402.1(30610904:30614679);MSTRG.2402.2(30610904:30614679)
1	30611955	30611955	-	30611955	intergenic	MSTRG.2402	30610904-30614679	MSTRG.2402.1(30610904:30614679);MSTRG.2402.2(30610904:30614679)
1	30612271	30612271	-	30612271	intergenic	MSTRG.2402	30610904-30614679	MSTRG.2402.1(30610904:30614679);MSTRG.2402.2(30610904:30614679)
1	30612343	30612343	-	30612343	intergenic	MSTRG.2402	30610904-30614679	MSTRG.2402.1(30610904:30614679);MSTRG.2402.2(30610904:30614679)
1	30612427	30612430	-	30612427	intergenic	MSTRG.2402	30610904-30614679	MSTRG.2402.1(30610904:30614679);MSTRG.2402.2(30610904:30614679)
1	30612580	30612603	-	30612580	intergenic	MSTRG.2402	30610904-30614679	MSTRG.2402.1(30610904:30614679);MSTRG.2402.2(30610904:30614679)
1	30612641	30612840	-	30612685	intergenic	MSTRG.2402	30610904-30614679	MSTRG.2402.1(30610904:30614679);MSTRG.2402.2(30610904:30614679)
1	30612937	30612961	-	30612961	intergenic	MSTRG.2402	30610904-30614679	MSTRG.2402.1(30610904:30614679);MSTRG.2402.2(30610904:30614679)
1	30613056	30613076	-	30613071	intergenic	MSTRG.2402	30610904-30614679	MSTRG.2402.1(30610904:30614679);MSTRG.2402.2(30610904:30614679)
1	30613223	30613229	-	30613229	intergenic	MSTRG.2402	30610904-30614679	MSTRG.2402.1(30610904:30614679);MSTRG.2402.2(30610904:30614679)
1	30613899	30613899	-	30613899	intergenic	MSTRG.2402	30610904-30614679	MSTRG.2402.1(30610904:30614679);MSTRG.2402.2(30610904:30614679)
1	30613968	30613970	-	30613970	intergenic	MSTRG.2402	30610904-30614679	MSTRG.2402.1(30610904:30614679);MSTRG.2402.2(30610904:30614679)
1	30614018	30614045	-	30614036	intergenic	MSTRG.2402	30610904-30614679	MSTRG.2402.1(30610904:30614679);MSTRG.2402.2(30610904:30614679)
1	30614139	30614152	-	30614142	intergenic	MSTRG.2402	30610904-30614679	MSTRG.2402.1(30610904:30614679);MSTRG.2402.2(30610904:30614679)
1	30982874	30982874	-	30982874	intergenic	MSTRG.2413	30969489-30983606	MSTRG.2413.1(30969489:30983606);Zm00001d028328_T001(30969605:30971412);MSTRG.2413.3(30982892:30983528)
1	30982933	30982933	-	30982933	intergenic	MSTRG.2413	30969489-30983606	MSTRG.2413.1(30969489:30983606);Zm00001d028328_T001(30969605:30971412);MSTRG.2413.3(30982892:30983528)
1	31364762	31364762	-	31364762	intergenic	MSTRG.2436	31364726-31592501	MSTRG.2436.1(31364726:31592501);MSTRG.2436.2(31364735:31512741);MSTRG.2436.3(31364763:31592501);MSTRG.2436.4(31364768:31592501);MSTRG.2436.5(31364787:31514901);MSTRG.2436.6(31364840:31512738);MSTRG.2436.7(31507968:31514901)
1	31364808	31364854	-	31364823	intergenic	MSTRG.2436	31364726-31592501	MSTRG.2436.1(31364726:31592501);MSTRG.2436.2(31364735:31512741);MSTRG.2436.3(31364763:31592501);MSTRG.2436.4(31364768:31592501);MSTRG.2436.5(31364787:31514901);MSTRG.2436.6(31364840:31512738);MSTRG.2436.7(31507968:31514901)
1	31364880	31365002	-	31364892	intergenic	MSTRG.2436	31364726-31592501	MSTRG.2436.1(31364726:31592501);MSTRG.2436.2(31364735:31512741);MSTRG.2436.3(31364763:31592501);MSTRG.2436.4(31364768:31592501);MSTRG.2436.5(31364787:31514901);MSTRG.2436.6(31364840:31512738);MSTRG.2436.7(31507968:31514901)
1	31507929	31507932	-	31507929	intergenic	MSTRG.2436	31364726-31592501	MSTRG.2436.1(31364726:31592501);MSTRG.2436.2(31364735:31512741);MSTRG.2436.3(31364763:31592501);MSTRG.2436.4(31364768:31592501);MSTRG.2436.5(31364787:31514901);MSTRG.2436.6(31364840:31512738);MSTRG.2436.7(31507968:31514901)
1	31507975	31507976	-	31507975	intergenic	MSTRG.2436	31364726-31592501	MSTRG.2436.1(31364726:31592501);MSTRG.2436.2(31364735:31512741);MSTRG.2436.3(31364763:31592501);MSTRG.2436.4(31364768:31592501);MSTRG.2436.5(31364787:31514901);MSTRG.2436.6(31364840:31512738);MSTRG.2436.7(31507968:31514901)
1	31508004	31508120	-	31508106	intergenic	MSTRG.2436	31364726-31592501	MSTRG.2436.1(31364726:31592501);MSTRG.2436.2(31364735:31512741);MSTRG.2436.3(31364763:31592501);MSTRG.2436.4(31364768:31592501);MSTRG.2436.5(31364787:31514901);MSTRG.2436.6(31364840:31512738);MSTRG.2436.7(31507968:31514901)
1	31508158	31508158	-	31508158	intergenic	MSTRG.2436	31364726-31592501	MSTRG.2436.1(31364726:31592501);MSTRG.2436.2(31364735:31512741);MSTRG.2436.3(31364763:31592501);MSTRG.2436.4(31364768:31592501);MSTRG.2436.5(31364787:31514901);MSTRG.2436.6(31364840:31512738);MSTRG.2436.7(31507968:31514901)
1	33453360	33453360	-	33453360	intergenic	MSTRG.2521	33451485-33454759	MSTRG.2521.1(33451485:33454759)
1	34922091	34922095	-	34922091	intergenic	MSTRG.2590	34922015-34922630	MSTRG.2590.1(34922015:34922630)
1	34922122	34922157	-	34922144	intergenic	MSTRG.2590	34922015-34922630	MSTRG.2590.1(34922015:34922630)
1	35242344	35242344	-	35242344	intergenic	MSTRG.2606	35242263-35252928	MSTRG.2606.1(35242263:35252926);MSTRG.2606.2(35242422:35252928)
1	35243168	35243264	-	35243183	intergenic	MSTRG.2606	35242263-35252928	MSTRG.2606.1(35242263:35252926);MSTRG.2606.2(35242422:35252928)
1	35243306	35243321	-	35243316	intergenic	MSTRG.2606	35242263-35252928	MSTRG.2606.1(35242263:35252926);MSTRG.2606.2(35242422:35252928)
1	35243360	35243368	-	35243366	intergenic	MSTRG.2606	35242263-35252928	MSTRG.2606.1(35242263:35252926);MSTRG.2606.2(35242422:35252928)
1	35248049	35248049	-	35248049	intergenic	MSTRG.2606	35242263-35252928	MSTRG.2606.1(35242263:35252926);MSTRG.2606.2(35242422:35252928)
1	36143036	36143051	-	36143036	intergenic	MSTRG.2651	36141240-36147242	MSTRG.2651.1(36141240:36147242)
1	38076877	38076918	-	38076877	intergenic	MSTRG.2717	38076848-38077341	MSTRG.2717.1(38076848:38077341)
1	39083543	39083549	-	39083549	intergenic	MSTRG.2772	38974517-39086445	MSTRG.2772.1(38974517:39086372);MSTRG.2772.2(38986315:39086387);MSTRG.2772.3(38993231:39086430);MSTRG.2772.4(38993231:39086365);MSTRG.2772.5(38993386:39086211);MSTRG.2772.6(38993396:39086445);MSTRG.2772.7(38993400:39086372);MSTRG.2772.8(38993471:39086365);Zm00001d028554_T002(38993551:38998358);MSTRG.2772.10(38993551:39086430);Zm00001d028554_T001(38993551:38998229);Zm00001d028554_T003(38993551:389…
1	40267680	40267739	-	40267697	intergenic	MSTRG.2840	40267577-40268716	MSTRG.2840.1(40267577:40268716);Zm00001d028598_T001(40268286:40268585)
1	40267781	40267786	-	40267781	intergenic	MSTRG.2840	40267577-40268716	MSTRG.2840.1(40267577:40268716);Zm00001d028598_T001(40268286:40268585)
1	41116422	41116427	-	41116427	intergenic	MSTRG.2874	41086167-41127330	MSTRG.2874.1(41086167:41089345);MSTRG.2874.2(41086323:41089656);MSTRG.2874.3(41086354:41127330);MSTRG.2874.4(41086361:41089137);Zm00001d028620_T001(41086669:41088588)
1	41117755	41117755	-	41117755	intergenic	MSTRG.2874	41086167-41127330	MSTRG.2874.1(41086167:41089345);MSTRG.2874.2(41086323:41089656);MSTRG.2874.3(41086354:41127330);MSTRG.2874.4(41086361:41089137);Zm00001d028620_T001(41086669:41088588)
1	42788615	42788615	-	42788615	intergenic	MSTRG.2956	42788583-42791442	MSTRG.2956.1(42788583:42791442)
1	43311846	43311846	-	43311846	intergenic	MSTRG.2970	43311778-43334856	MSTRG.2970.1(43311778:43328816);MSTRG.2970.2(43311788:43316577);MSTRG.2970.3(43312091:43316577);MSTRG.2970.4(43312091:43316577);Zm00001d028691_T002(43312091:43316577);Zm00001d028691_T003(43312091:43316577);Zm00001d028691_T004(43312164:43316405);MSTRG.2970.8(43328440:43330227);Zm00001d028692_T002(43328452:43331255);Zm00001d028692_T001(43328452:43331255);Zm00001d028692_T004(43328452:43334856);Zm000…
1	43719999	43720002	-	43720002	intergenic	MSTRG.2996	43713376-43724040	MSTRG.2996.1(43713376:43724040)
1	44512606	44512606	-	44512606	intergenic	MSTRG.3032	44457541-44532655	MSTRG.3032.1(44457541:44532655)
1	45863762	45863872	-	45863853	intergenic	MSTRG.3090	45863703-45868573	MSTRG.3090.1(45863703:45868541);MSTRG.3090.2(45863806:45868465);MSTRG.3090.3(45863814:45868545);MSTRG.3090.4(45865629:45868573)
1	45864449	45864449	-	45864449	intergenic	MSTRG.3090	45863703-45868573	MSTRG.3090.1(45863703:45868541);MSTRG.3090.2(45863806:45868465);MSTRG.3090.3(45863814:45868545);MSTRG.3090.4(45865629:45868573)
1	45867319	45867319	-	45867319	intergenic	MSTRG.3090	45863703-45868573	MSTRG.3090.1(45863703:45868541);MSTRG.3090.2(45863806:45868465);MSTRG.3090.3(45863814:45868545);MSTRG.3090.4(45865629:45868573)
1	45867375	45867384	-	45867384	intergenic	MSTRG.3090	45863703-45868573	MSTRG.3090.1(45863703:45868541);MSTRG.3090.2(45863806:45868465);MSTRG.3090.3(45863814:45868545);MSTRG.3090.4(45865629:45868573)
1	45867410	45867410	-	45867410	intergenic	MSTRG.3090	45863703-45868573	MSTRG.3090.1(45863703:45868541);MSTRG.3090.2(45863806:45868465);MSTRG.3090.3(45863814:45868545);MSTRG.3090.4(45865629:45868573)
1	45867773	45867773	-	45867773	intergenic	MSTRG.3090	45863703-45868573	MSTRG.3090.1(45863703:45868541);MSTRG.3090.2(45863806:45868465);MSTRG.3090.3(45863814:45868545);MSTRG.3090.4(45865629:45868573)
1	45867898	45867905	-	45867905	intergenic	MSTRG.3090	45863703-45868573	MSTRG.3090.1(45863703:45868541);MSTRG.3090.2(45863806:45868465);MSTRG.3090.3(45863814:45868545);MSTRG.3090.4(45865629:45868573)
1	46195093	46195119	-	46195116	intergenic	MSTRG.3117	46194967-46197931	MSTRG.3117.1(46194967:46197931);Zm00001d028779_T001(46196145:46197931)
1	46195241	46195266	-	46195257	intergenic	MSTRG.3117	46194967-46197931	MSTRG.3117.1(46194967:46197931);Zm00001d028779_T001(46196145:46197931)
1	47586685	47586685	-	47586685	intergenic	MSTRG.3180	47585887-47587974	MSTRG.3180.1(47585887:47587974)
1	47588928	47588928	-	47588928	intergenic	MSTRG.3181	47588493-47589385	MSTRG.3181.1(47588493:47589385)
1	52492535	52492535	-	52492535	intergenic	MSTRG.3350	52475726-52523432	MSTRG.3350.1(52475726:52523432)
1	53528696	53528704	-	53528697	intergenic	MSTRG.3406	53528695-53534609	MSTRG.3406.1(53528695:53534609);MSTRG.3406.2(53528695:53534532);MSTRG.3406.3(53528698:53534373);MSTRG.3406.4(53528699:53534594);MSTRG.3406.5(53528699:53534497);MSTRG.3406.6(53528699:53534445);MSTRG.3406.7(53528701:53534532);MSTRG.3406.8(53528701:53534497);MSTRG.3406.9(53528718:53534496);MSTRG.3406.10(53528720:53534495);MSTRG.3406.11(53528723:53534594);MSTRG.3406.12(53528727:53534409);MSTRG.3406.1…
1	53528739	53528767	-	53528767	intergenic	MSTRG.3406	53528695-53534609	MSTRG.3406.1(53528695:53534609);MSTRG.3406.2(53528695:53534532);MSTRG.3406.3(53528698:53534373);MSTRG.3406.4(53528699:53534594);MSTRG.3406.5(53528699:53534497);MSTRG.3406.6(53528699:53534445);MSTRG.3406.7(53528701:53534532);MSTRG.3406.8(53528701:53534497);MSTRG.3406.9(53528718:53534496);MSTRG.3406.10(53528720:53534495);MSTRG.3406.11(53528723:53534594);MSTRG.3406.12(53528727:53534409);MSTRG.3406.1…
1	53528804	53528820	-	53528820	intergenic	MSTRG.3406	53528695-53534609	MSTRG.3406.1(53528695:53534609);MSTRG.3406.2(53528695:53534532);MSTRG.3406.3(53528698:53534373);MSTRG.3406.4(53528699:53534594);MSTRG.3406.5(53528699:53534497);MSTRG.3406.6(53528699:53534445);MSTRG.3406.7(53528701:53534532);MSTRG.3406.8(53528701:53534497);MSTRG.3406.9(53528718:53534496);MSTRG.3406.10(53528720:53534495);MSTRG.3406.11(53528723:53534594);MSTRG.3406.12(53528727:53534409);MSTRG.3406.1…
1	54251477	54251606	-	54251535	intergenic	MSTRG.3424	54251436-54251706	MSTRG.3424.1(54251436:54251706)
1	54623828	54623847	-	54623828	intergenic	MSTRG.3437	54623725-54639249	MSTRG.3437.1(54623725:54639242);MSTRG.3437.2(54623725:54639213);MSTRG.3437.3(54623951:54639242);MSTRG.3437.4(54623975:54639242);Zm00001d029009_T002(54624061:54639242);Zm00001d029009_T001(54624061:54631358);Zm00001d029009_T003(54624061:54639249);Zm00001d029009_T004(54624296:54639249);MSTRG.3437.9(54624394:54639242);MSTRG.3437.10(54624394:54639175);MSTRG.3437.11(54624394:54639176);MSTRG.3437.12(546…
1	54623873	54623881	-	54623873	intergenic	MSTRG.3437	54623725-54639249	MSTRG.3437.1(54623725:54639242);MSTRG.3437.2(54623725:54639213);MSTRG.3437.3(54623951:54639242);MSTRG.3437.4(54623975:54639242);Zm00001d029009_T002(54624061:54639242);Zm00001d029009_T001(54624061:54631358);Zm00001d029009_T003(54624061:54639249);Zm00001d029009_T004(54624296:54639249);MSTRG.3437.9(54624394:54639242);MSTRG.3437.10(54624394:54639175);MSTRG.3437.11(54624394:54639176);MSTRG.3437.12(546…
1	55167548	55167548	-	55167548	intergenic	MSTRG.3453	55108882-55191354	Zm00001d029023_T001(55108882:55115021);MSTRG.3453.2(55108908:55191354);Zm00001d029023_T002(55108953:55115021);MSTRG.3453.4(55108990:55115021);MSTRG.3453.5(55108990:55114970);Zm00001d029023_T003(55108990:55114883);MSTRG.3453.7(55109038:55114310);Zm00001d029023_T004(55109263:55114970);MSTRG.3453.9(55109310:55114840);Zm00001d029023_T005(55109310:55115021);Zm00001d029023_T006(55109326:55114901);Zm000…
1	55245073	55245098	-	55245098	intergenic	MSTRG.3463	55245060-55247371	MSTRG.3463.1(55245060:55247371);MSTRG.3463.2(55245172:55247371);Zm00001d029028_T001(55246805:55247371)
1	55245162	55245284	-	55245246	intergenic	MSTRG.3463	55245060-55247371	MSTRG.3463.1(55245060:55247371);MSTRG.3463.2(55245172:55247371);Zm00001d029028_T001(55246805:55247371)
1	55246277	55246277	-	55246277	intergenic	MSTRG.3463	55245060-55247371	MSTRG.3463.1(55245060:55247371);MSTRG.3463.2(55245172:55247371);Zm00001d029028_T001(55246805:55247371)
1	57453876	57453878	-	57453876	intergenic	MSTRG.3555	57446555-57480950	MSTRG.3555.1(57446555:57480950)
1	58540403	58540403	-	58540403	intergenic	MSTRG.3600	58540297-58540834	MSTRG.3600.1(58540297:58540834)
1	61798409	61798409	-	61798409	intergenic	MSTRG.3703	61783900-61799026	MSTRG.3703.1(61783900:61799026);Zm00001d029196_T001(61783914:61789718);Zm00001d029196_T002(61784029:61789296)
1	62739456	62739456	-	62739456	intergenic	MSTRG.3747	62737958-62745407	MSTRG.3747.1(62737958:62745407);MSTRG.3747.2(62743081:62745325);Zm00001d029217_T001(62743193:62743990)
1	62744036	62744036	-	62744036	intergenic	MSTRG.3747	62737958-62745407	MSTRG.3747.1(62737958:62745407);MSTRG.3747.2(62743081:62745325);Zm00001d029217_T001(62743193:62743990)
1	62744540	62744540	-	62744540	intergenic	MSTRG.3747	62737958-62745407	MSTRG.3747.1(62737958:62745407);MSTRG.3747.2(62743081:62745325);Zm00001d029217_T001(62743193:62743990)
1	62744646	62744668	-	62744646	intergenic	MSTRG.3747	62737958-62745407	MSTRG.3747.1(62737958:62745407);MSTRG.3747.2(62743081:62745325);Zm00001d029217_T001(62743193:62743990)
1	63214579	63214596	-	63214588	intergenic	MSTRG.3764	63214485-63234417	MSTRG.3764.1(63214485:63234417);Zm00001d029231_T001(63222181:63234373)
1	63214839	63214843	-	63214843	intergenic	MSTRG.3764	63214485-63234417	MSTRG.3764.1(63214485:63234417);Zm00001d029231_T001(63222181:63234373)
1	63214869	63214886	-	63214869	intergenic	MSTRG.3764	63214485-63234417	MSTRG.3764.1(63214485:63234417);Zm00001d029231_T001(63222181:63234373)
1	63273177	63273177	-	63273177	intergenic	MSTRG.3769	63272523-63273327	MSTRG.3769.1(63272523:63273327)
1	63576554	63576554	-	63576554	intergenic	MSTRG.3787	63576254-63578497	MSTRG.3787.1(63576254:63578442);MSTRG.3787.2(63576361:63578442);MSTRG.3787.3(63576470:63578497)
1	63576617	63576617	-	63576617	intergenic	MSTRG.3787	63576254-63578497	MSTRG.3787.1(63576254:63578442);MSTRG.3787.2(63576361:63578442);MSTRG.3787.3(63576470:63578497)
1	63577762	63577762	-	63577762	intergenic	MSTRG.3787	63576254-63578497	MSTRG.3787.1(63576254:63578442);MSTRG.3787.2(63576361:63578442);MSTRG.3787.3(63576470:63578497)
1	64422229	64422229	-	64422229	intergenic	MSTRG.3822	64422228-64423688	MSTRG.3822.1(64422228:64423688)
1	64422271	64422271	-	64422271	intergenic	MSTRG.3822	64422228-64423688	MSTRG.3822.1(64422228:64423688)
1	64422821	64422827	-	64422821	intergenic	MSTRG.3822	64422228-64423688	MSTRG.3822.1(64422228:64423688)
1	65308404	65308404	-	65308404	intergenic	MSTRG.3856	65308391-65309604	MSTRG.3856.1(65308391:65309604)
1	66385007	66385007	-	66385007	intergenic	MSTRG.3900	66384831-66388090	MSTRG.3900.1(66384831:66388090);MSTRG.3900.2(66385814:66387966);MSTRG.3900.3(66385814:66387966);MSTRG.3900.4(66385825:66387967);MSTRG.3900.5(66385838:66388084)
1	66385089	66385089	-	66385089	intergenic	MSTRG.3900	66384831-66388090	MSTRG.3900.1(66384831:66388090);MSTRG.3900.2(66385814:66387966);MSTRG.3900.3(66385814:66387966);MSTRG.3900.4(66385825:66387967);MSTRG.3900.5(66385838:66388084)
1	66385129	66385129	-	66385129	intergenic	MSTRG.3900	66384831-66388090	MSTRG.3900.1(66384831:66388090);MSTRG.3900.2(66385814:66387966);MSTRG.3900.3(66385814:66387966);MSTRG.3900.4(66385825:66387967);MSTRG.3900.5(66385838:66388084)
1	67104450	67104450	-	67104450	intergenic	MSTRG.3929	67104317-67105218	MSTRG.3929.1(67104317:67105218);MSTRG.3929.2(67104333:67105218)
1	67972189	67972189	-	67972189	intergenic	MSTRG.3958	67971537-67980266	MSTRG.3958.1(67971537:67980266);MSTRG.3958.2(67971615:67974146);MSTRG.3958.3(67971615:67974133);MSTRG.3958.4(67972105:67974052)
1	68249893	68249915	-	68249895	intergenic	MSTRG.3968	68244805-68250775	MSTRG.3968.1(68244805:68250775);MSTRG.3968.2(68245014:68247103);MSTRG.3968.3(68245670:68247403)
1	68805988	68805989	-	68805988	intergenic	MSTRG.3993	68805972-68808350	MSTRG.3993.1(68805972:68808350)
1	69624095	69624095	-	69624095	intergenic	MSTRG.4015	69619280-69628628	MSTRG.4015.1(69619280:69624716);MSTRG.4015.2(69624334:69628628);Zm00001d029417_T002(69624781:69628628);Zm00001d029417_T001(69624781:69628566)
1	71155456	71155456	-	71155456	intergenic	MSTRG.4072	71155319-71156898	MSTRG.4072.1(71155319:71156898)
1	71820106	71820106	-	71820106	intergenic	MSTRG.4088	71813476-71821161	MSTRG.4088.1(71813476:71821161)
1	72491476	72491490	-	72491476	intergenic	MSTRG.4113	72490776-72493416	MSTRG.4113.1(72490776:72493416);MSTRG.4113.2(72491247:72493416);MSTRG.4113.3(72491306:72493322)
1	72491528	72491541	-	72491541	intergenic	MSTRG.4113	72490776-72493416	MSTRG.4113.1(72490776:72493416);MSTRG.4113.2(72491247:72493416);MSTRG.4113.3(72491306:72493322)
1	72491566	72491592	-	72491592	intergenic	MSTRG.4113	72490776-72493416	MSTRG.4113.1(72490776:72493416);MSTRG.4113.2(72491247:72493416);MSTRG.4113.3(72491306:72493322)
1	72491624	72491651	-	72491641	intergenic	MSTRG.4113	72490776-72493416	MSTRG.4113.1(72490776:72493416);MSTRG.4113.2(72491247:72493416);MSTRG.4113.3(72491306:72493322)
1	73677026	73677026	-	73677026	intergenic	MSTRG.4150	73676932-73677239	MSTRG.4150.1(73676932:73677239)
1	73708394	73708394	-	73708394	intergenic	MSTRG.4151	73706351-73710250	MSTRG.4151.1(73706351:73710250);MSTRG.4151.2(73706441:73707614);Zm00001d029506_T001(73706673:73707614)
1	74750808	74750808	-	74750808	intergenic	MSTRG.4181	74748979-74751262	MSTRG.4181.1(74748979:74751258);MSTRG.4181.2(74748995:74751262);MSTRG.4181.3(74748995:74751221);MSTRG.4181.4(74748995:74751248)
1	74750974	74750979	-	74750974	intergenic	MSTRG.4181	74748979-74751262	MSTRG.4181.1(74748979:74751258);MSTRG.4181.2(74748995:74751262);MSTRG.4181.3(74748995:74751221);MSTRG.4181.4(74748995:74751248)
1	75659431	75659431	-	75659431	intergenic	MSTRG.4204	75646206-75695007	MSTRG.4204.1(75646206:75695007)
1	76178227	76178227	-	76178227	intergenic	MSTRG.4230	76092431-76182150	MSTRG.4230.1(76092431:76182031);MSTRG.4230.2(76177845:76182061);MSTRG.4230.3(76177938:76182150);MSTRG.4230.4(76178345:76182025);MSTRG.4230.5(76178363:76181281);Zm00001d029559_T001(76180529:76181281)
1	76178500	76178578	-	76178578	intergenic	MSTRG.4230	76092431-76182150	MSTRG.4230.1(76092431:76182031);MSTRG.4230.2(76177845:76182061);MSTRG.4230.3(76177938:76182150);MSTRG.4230.4(76178345:76182025);MSTRG.4230.5(76178363:76181281);Zm00001d029559_T001(76180529:76181281)
1	76178618	76178618	-	76178618	intergenic	MSTRG.4230	76092431-76182150	MSTRG.4230.1(76092431:76182031);MSTRG.4230.2(76177845:76182061);MSTRG.4230.3(76177938:76182150);MSTRG.4230.4(76178345:76182025);MSTRG.4230.5(76178363:76181281);Zm00001d029559_T001(76180529:76181281)
1	77000318	77000318	-	77000318	intergenic	MSTRG.4257	76999795-77002256	MSTRG.4257.1(76999795:77002256);MSTRG.4257.2(76999867:77002110);Zm00001d022762_T001(77001696:77002256)
1	81312019	81312019	-	81312019	intergenic	MSTRG.4389	81311893-81321165	MSTRG.4389.1(81311893:81321015);MSTRG.4389.2(81312293:81321044);Zm00001d029649_T002(81312293:81321165);Zm00001d029649_T001(81312293:81321165)
1	81312067	81312073	-	81312067	intergenic	MSTRG.4389	81311893-81321165	MSTRG.4389.1(81311893:81321015);MSTRG.4389.2(81312293:81321044);Zm00001d029649_T002(81312293:81321165);Zm00001d029649_T001(81312293:81321165)
1	81671974	81671974	-	81671974	intergenic	MSTRG.4400	81612730-81705573	MSTRG.4400.1(81612730:81705573);Zm00001d029654_T004(81612748:81617458);Zm00001d029654_T001(81612748:81617458);Zm00001d029654_T003(81612748:81617458);Zm00001d029654_T002(81612748:81617458);Zm00001d029654_T005(81612837:81617276);MSTRG.4400.7(81612855:81617276);MSTRG.4400.8(81612855:81617276);MSTRG.4400.9(81612855:81617276);Zm00001d029654_T006(81612855:81616876)
1	82029369	82029385	-	82029369	intergenic	MSTRG.4420	82029317-82029986	MSTRG.4420.1(82029317:82029986)
1	82029417	82029417	-	82029417	intergenic	MSTRG.4420	82029317-82029986	MSTRG.4420.1(82029317:82029986)
1	82096710	82096710	-	82096710	intergenic	MSTRG.4422	82094503-82099748	MSTRG.4422.1(82094503:82099748);MSTRG.4422.2(82096395:82099647);MSTRG.4422.3(82096626:82099745);MSTRG.4422.4(82096647:82099618);MSTRG.4422.5(82096686:82099618);MSTRG.4422.6(82096705:82099615);Zm00001d029672_T003(82097005:82099618);Zm00001d029672_T001(82097005:82098178);Zm00001d029672_T004(82097005:82099710);Zm00001d029672_T002(82097005:82098547)
1	82096761	82096761	-	82096761	intergenic	MSTRG.4422	82094503-82099748	MSTRG.4422.1(82094503:82099748);MSTRG.4422.2(82096395:82099647);MSTRG.4422.3(82096626:82099745);MSTRG.4422.4(82096647:82099618);MSTRG.4422.5(82096686:82099618);MSTRG.4422.6(82096705:82099615);Zm00001d029672_T003(82097005:82099618);Zm00001d029672_T001(82097005:82098178);Zm00001d029672_T004(82097005:82099710);Zm00001d029672_T002(82097005:82098547)
1	84664576	84664576	-	84664576	intergenic	MSTRG.4520	84664157-84666506	MSTRG.4520.1(84664157:84666378);MSTRG.4520.2(84664469:84666506);Zm00001d029738_T001(84664818:84666506)
1	84664643	84664643	-	84664643	intergenic	MSTRG.4520	84664157-84666506	MSTRG.4520.1(84664157:84666378);MSTRG.4520.2(84664469:84666506);Zm00001d029738_T001(84664818:84666506)
1	86006278	86006278	-	86006278	intergenic	MSTRG.4557	86001409-86006913	MSTRG.4557.1(86001409:86006913);MSTRG.4557.2(86004467:86006324)
1	86101890	86101890	-	86101890	intergenic	MSTRG.4562	86092053-86134507	MSTRG.4562.1(86092053:86134490);MSTRG.4562.2(86129941:86134507);MSTRG.4562.3(86130032:86134477);MSTRG.4562.4(86130071:86134490)
1	87485386	87485386	-	87485386	intergenic	MSTRG.4598	87448684-87487859	MSTRG.4598.1(87448684:87470870);MSTRG.4598.2(87448706:87487859);Zm00001d029799_T001(87448744:87449790);Zm00001d029799_T002(87448744:87457844);MSTRG.4598.5(87448764:87471072);MSTRG.4598.6(87448767:87486803);Zm00001d029801_T001(87469723:87470947);Zm00001d029801_T002(87469723:87475392);MSTRG.4598.9(87469733:87487804);MSTRG.4598.10(87469742:87487816);MSTRG.4598.11(87476388:87487859);MSTRG.4598.12(874…
1	88467708	88467716	-	88467716	intergenic	MSTRG.4628	88443920-88468588	MSTRG.4628.1(88443920:88468588);MSTRG.4628.2(88467715:88468588);Zm00001d029820_T001(88468178:88468588)
1	89405847	89405868	-	89405847	intergenic	MSTRG.4651	89405768-89406049	MSTRG.4651.1(89405768:89406049)
1	92735091	92735132	-	92735116	intergenic	MSTRG.4756	92735046-92738508	MSTRG.4756.1(92735046:92738508);MSTRG.4756.2(92735090:92738288);MSTRG.4756.3(92735097:92738256);MSTRG.4756.4(92735117:92738302)
1	92735163	92735253	-	92735218	intergenic	MSTRG.4756	92735046-92738508	MSTRG.4756.1(92735046:92738508);MSTRG.4756.2(92735090:92738288);MSTRG.4756.3(92735097:92738256);MSTRG.4756.4(92735117:92738302)
1	92897789	92897789	-	92897789	intergenic	MSTRG.4759	92897124-92898665	MSTRG.4759.1(92897124:92898665)
1	96144530	96144530	-	96144530	intergenic	MSTRG.4818	96084382-96145431	MSTRG.4818.1(96084382:96145431);MSTRG.4818.2(96084382:96145321);Zm00001d029948_T001(96084382:96087383)
1	96574784	96574784	-	96574784	intergenic	MSTRG.4834	96573390-96575284	MSTRG.4834.1(96573390:96575284)
1	96903913	96903915	-	96903915	intergenic	MSTRG.4838	96844582-96957516	MSTRG.4838.1(96844582:96907767);Zm00001d029968_T001(96900888:96902992);MSTRG.4838.3(96901092:96931600);MSTRG.4838.4(96901092:96904697);MSTRG.4838.5(96901112:96952461);MSTRG.4838.6(96901138:96957516);MSTRG.4838.7(96903878:96905818);Zm00001d029969_T001(96905186:96905818)
1	96904070	96904070	-	96904070	intergenic	MSTRG.4838	96844582-96957516	MSTRG.4838.1(96844582:96907767);Zm00001d029968_T001(96900888:96902992);MSTRG.4838.3(96901092:96931600);MSTRG.4838.4(96901092:96904697);MSTRG.4838.5(96901112:96952461);MSTRG.4838.6(96901138:96957516);MSTRG.4838.7(96903878:96905818);Zm00001d029969_T001(96905186:96905818)
1	96904108	96904108	-	96904108	intergenic	MSTRG.4838	96844582-96957516	MSTRG.4838.1(96844582:96907767);Zm00001d029968_T001(96900888:96902992);MSTRG.4838.3(96901092:96931600);MSTRG.4838.4(96901092:96904697);MSTRG.4838.5(96901112:96952461);MSTRG.4838.6(96901138:96957516);MSTRG.4838.7(96903878:96905818);Zm00001d029969_T001(96905186:96905818)
1	97045207	97045207	-	97045207	intergenic	MSTRG.4841	97044624-97046748	MSTRG.4841.1(97044624:97046748)
1	98585228	98585232	-	98585228	intergenic	MSTRG.4878	98584378-98599380	MSTRG.4878.1(98584378:98599380);MSTRG.4878.2(98584438:98599329);MSTRG.4878.3(98585251:98599244);Zm00001d030005_T002(98585427:98594780);MSTRG.4878.5(98591707:98598802);MSTRG.4878.6(98595360:98599310)
1	100650275	100650312	-	100650277	intergenic	MSTRG.4914	100650266-100686208	MSTRG.4914.1(100650266:100652869);MSTRG.4914.2(100650282:100686208);Zm00001d030028_T001(100650752:100652869)
1	102356143	102356143	-	102356143	intergenic	MSTRG.4948	102356057-102357340	MSTRG.4948.1(102356057:102357340)
1	104117649	104117649	-	104117649	intergenic	MSTRG.4973	104032321-104120239	MSTRG.4973.1(104032321:104120239);MSTRG.4973.2(104118678:104119356);Zm00001d030079_T001(104118705:104119586)
1	104117810	104117810	-	104117810	intergenic	MSTRG.4973	104032321-104120239	MSTRG.4973.1(104032321:104120239);MSTRG.4973.2(104118678:104119356);Zm00001d030079_T001(104118705:104119586)
1	107330332	107330359	-	107330347	intergenic	MSTRG.5030	107330249-107333850	MSTRG.5030.1(107330249:107333850)
1	107332189	107332189	-	107332189	intergenic	MSTRG.5030	107330249-107333850	MSTRG.5030.1(107330249:107333850)
1	107332214	107332236	-	107332214	intergenic	MSTRG.5030	107330249-107333850	MSTRG.5030.1(107330249:107333850)
1	107333086	107333102	-	107333086	intergenic	MSTRG.5030	107330249-107333850	MSTRG.5030.1(107330249:107333850)
1	107333172	107333172	-	107333172	intergenic	MSTRG.5030	107330249-107333850	MSTRG.5030.1(107330249:107333850)
1	107333299	107333299	-	107333299	intergenic	MSTRG.5030	107330249-107333850	MSTRG.5030.1(107330249:107333850)
1	107335008	107335025	-	107335025	intergenic	MSTRG.5032	107334961-107338846	MSTRG.5032.1(107334961:107338846);MSTRG.5032.2(107334964:107336656);Zm00001d030123_T001(107336969:107338846)
1	107335376	107335376	-	107335376	intergenic	MSTRG.5032	107334961-107338846	MSTRG.5032.1(107334961:107338846);MSTRG.5032.2(107334964:107336656);Zm00001d030123_T001(107336969:107338846)
1	108193468	108193468	-	108193468	intergenic	MSTRG.5045	108193443-108288994	MSTRG.5045.1(108193443:108230750);Zm00001d030131_T001(108193722:108197646);Zm00001d030131_T002(108193737:108197506);Zm00001d030131_T004(108193737:108197646);Zm00001d030131_T003(108193737:108197646);Zm00001d030131_T005(108193738:108197624);MSTRG.5045.7(108193740:108288760);Zm00001d030131_T006(108193740:108197582);Zm00001d030131_T007(108194826:108197582);Zm00001d030133_T001(108282883:108286752);Zm0…
1	108410046	108410051	-	108410046	intergenic	MSTRG.5050	108346151-108470397	MSTRG.5050.1(108346151:108470397);MSTRG.5050.2(108346151:108427241);MSTRG.5050.3(108346164:108470397);MSTRG.5050.4(108346165:108427114);Zm00001d030138_T001(108425304:108427389)
1	109744214	109744306	-	109744286	intergenic	MSTRG.5090	109742316-109745035	MSTRG.5090.1(109742316:109745035)
1	109744431	109744458	-	109744431	intergenic	MSTRG.5090	109742316-109745035	MSTRG.5090.1(109742316:109745035)
1	110216107	110216107	-	110216107	intergenic	MSTRG.5106	110213874-110216644	MSTRG.5106.1(110213874:110216644);MSTRG.5106.2(110214698:110216571);MSTRG.5106.3(110214721:110216644)
1	110826723	110826724	-	110826724	intergenic	MSTRG.5117	110826545-110826768	MSTRG.5117.1(110826545:110826768)
1	111872624	111872624	-	111872624	intergenic	MSTRG.5121	111871751-111872936	MSTRG.5121.1(111871751:111872936)
1	116810100	116810100	-	116810100	intergenic	MSTRG.5199	116810048-116810340	MSTRG.5199.1(116810048:116810340)
1	120786636	120786663	-	120786636	intergenic	MSTRG.5268	120744620-120809956	MSTRG.5268.1(120744620:120809956)
1	123461382	123461382	-	123461382	intergenic	MSTRG.5309	123383744-123467804	Zm00001d030340_T001(123383744:123433372);Zm00001d030340_T002(123383744:123433372);MSTRG.5309.3(123383951:123467796);Zm00001d030340_T003(123383978:123410771);Zm00001d030340_T007(123383978:123433372);Zm00001d030340_T005(123383978:123433372);Zm00001d030340_T006(123383978:123433372);Zm00001d030340_T009(123383979:123433372);Zm00001d030340_T010(123383981:123433372);Zm00001d030340_T013(123384020:1234333…
1	135198796	135198819	-	135198796	intergenic	MSTRG.5458	135197969-135245514	MSTRG.5458.1(135197969:135245514);MSTRG.5458.2(135198204:135245514);MSTRG.5458.3(135198742:135245465);MSTRG.5458.4(135198752:135245483);Zm00001d030470_T001(135199904:135200188);Zm00001d030471_T001(135204206:135245514);Zm00001d030471_T003(135204206:135245514);Zm00001d030471_T002(135204206:135245514);Zm00001d030471_T004(135210187:135245514)
1	135199211	135199211	-	135199211	intergenic	MSTRG.5458	135197969-135245514	MSTRG.5458.1(135197969:135245514);MSTRG.5458.2(135198204:135245514);MSTRG.5458.3(135198742:135245465);MSTRG.5458.4(135198752:135245483);Zm00001d030470_T001(135199904:135200188);Zm00001d030471_T001(135204206:135245514);Zm00001d030471_T003(135204206:135245514);Zm00001d030471_T002(135204206:135245514);Zm00001d030471_T004(135210187:135245514)
1	135668288	135668336	-	135668314	intergenic	MSTRG.5466	135668230-135668478	MSTRG.5466.1(135668230:135668478)
1	139651018	139651146	-	139651037	intergenic	MSTRG.5493	139650943-139656715	MSTRG.5493.1(139650943:139656715);Zm00001d030500_T001(139651718:139653346)
1	139651211	139651211	-	139651211	intergenic	MSTRG.5493	139650943-139656715	MSTRG.5493.1(139650943:139656715);Zm00001d030500_T001(139651718:139653346)
1	139656174	139656193	-	139656193	intergenic	MSTRG.5493	139650943-139656715	MSTRG.5493.1(139650943:139656715);Zm00001d030500_T001(139651718:139653346)
1	141693025	141693027	-	141693025	intergenic	MSTRG.5519	141678966-141709479	MSTRG.5519.1(141678966:141709459);MSTRG.5519.2(141705972:141709479)
1	141841793	141841793	-	141841793	intergenic	MSTRG.5524	141841575-141842323	MSTRG.5524.1(141841575:141842323)
1	142030542	142030542	-	142030542	intergenic	MSTRG.5525	141968000-142032262	MSTRG.5525.1(141968000:142032262);Zm00001d030530_T001(142031879:142032262)
1	146610623	146610623	-	146610623	intergenic	MSTRG.5608	146601927-146632800	MSTRG.5608.1(146601927:146632745);Zm00001d030587_T001(146601933:146603737);MSTRG.5608.3(146601949:146632745);MSTRG.5608.4(146602012:146632721);Zm00001d030588_T001(146631961:146632800)
1	146631413	146631413	-	146631413	intergenic	MSTRG.5608	146601927-146632800	MSTRG.5608.1(146601927:146632745);Zm00001d030587_T001(146601933:146603737);MSTRG.5608.3(146601949:146632745);MSTRG.5608.4(146602012:146632721);Zm00001d030588_T001(146631961:146632800)
1	148807991	148807991	-	148807991	intergenic	MSTRG.5638	148793578-148833302	MSTRG.5638.1(148793578:148833302);MSTRG.5638.2(148822710:148833298);Zm00001d030618_T001(148822878:148823223)
1	148824480	148824480	-	148824480	intergenic	MSTRG.5638	148793578-148833302	MSTRG.5638.1(148793578:148833302);MSTRG.5638.2(148822710:148833298);Zm00001d030618_T001(148822878:148823223)
1	148832319	148832319	-	148832319	intergenic	MSTRG.5638	148793578-148833302	MSTRG.5638.1(148793578:148833302);MSTRG.5638.2(148822710:148833298);Zm00001d030618_T001(148822878:148823223)
1	148832449	148832449	-	148832449	intergenic	MSTRG.5638	148793578-148833302	MSTRG.5638.1(148793578:148833302);MSTRG.5638.2(148822710:148833298);Zm00001d030618_T001(148822878:148823223)
1	148832599	148832599	-	148832599	intergenic	MSTRG.5638	148793578-148833302	MSTRG.5638.1(148793578:148833302);MSTRG.5638.2(148822710:148833298);Zm00001d030618_T001(148822878:148823223)
1	151223571	151223571	-	151223571	intergenic	MSTRG.5680	151221338-151225632	MSTRG.5680.1(151221338:151225632)
1	151224234	151224234	-	151224234	intergenic	MSTRG.5680	151221338-151225632	MSTRG.5680.1(151221338:151225632)
1	153483599	153483600	-	153483599	intergenic	MSTRG.5732	153481710-153484569	MSTRG.5732.1(153481710:153484569)
1	154088147	154088147	-	154088147	intergenic	MSTRG.5739	154083338-154145156	MSTRG.5739.1(154083338:154145156)
1	156541480	156541483	-	156541483	intergenic	MSTRG.5781	156541399-156541961	MSTRG.5781.1(156541399:156541961)
1	158432553	158432595	-	158432558	intergenic	MSTRG.5820	158432524-158446284	MSTRG.5820.1(158432524:158446284);MSTRG.5820.2(158432586:158438297);Zm00001d030760_T001(158436910:158446284);Zm00001d030760_T004(158436910:158446284);Zm00001d030760_T003(158436910:158446284);Zm00001d030760_T002(158436910:158446284);MSTRG.5820.7(158438667:158446231);MSTRG.5820.8(158438667:158446284);Zm00001d030760_T006(158438668:158446284);Zm00001d030760_T007(158438668:158446284);Zm00001d030760_T0…
1	158432626	158432640	-	158432626	intergenic	MSTRG.5820	158432524-158446284	MSTRG.5820.1(158432524:158446284);MSTRG.5820.2(158432586:158438297);Zm00001d030760_T001(158436910:158446284);Zm00001d030760_T004(158436910:158446284);Zm00001d030760_T003(158436910:158446284);Zm00001d030760_T002(158436910:158446284);MSTRG.5820.7(158438667:158446231);MSTRG.5820.8(158438667:158446284);Zm00001d030760_T006(158438668:158446284);Zm00001d030760_T007(158438668:158446284);Zm00001d030760_T0…
1	158432707	158432715	-	158432715	intergenic	MSTRG.5820	158432524-158446284	MSTRG.5820.1(158432524:158446284);MSTRG.5820.2(158432586:158438297);Zm00001d030760_T001(158436910:158446284);Zm00001d030760_T004(158436910:158446284);Zm00001d030760_T003(158436910:158446284);Zm00001d030760_T002(158436910:158446284);MSTRG.5820.7(158438667:158446231);MSTRG.5820.8(158438667:158446284);Zm00001d030760_T006(158438668:158446284);Zm00001d030760_T007(158438668:158446284);Zm00001d030760_T0…
1	158432743	158432761	-	158432743	intergenic	MSTRG.5820	158432524-158446284	MSTRG.5820.1(158432524:158446284);MSTRG.5820.2(158432586:158438297);Zm00001d030760_T001(158436910:158446284);Zm00001d030760_T004(158436910:158446284);Zm00001d030760_T003(158436910:158446284);Zm00001d030760_T002(158436910:158446284);MSTRG.5820.7(158438667:158446231);MSTRG.5820.8(158438667:158446284);Zm00001d030760_T006(158438668:158446284);Zm00001d030760_T007(158438668:158446284);Zm00001d030760_T0…
1	158432786	158432786	-	158432786	intergenic	MSTRG.5820	158432524-158446284	MSTRG.5820.1(158432524:158446284);MSTRG.5820.2(158432586:158438297);Zm00001d030760_T001(158436910:158446284);Zm00001d030760_T004(158436910:158446284);Zm00001d030760_T003(158436910:158446284);Zm00001d030760_T002(158436910:158446284);MSTRG.5820.7(158438667:158446231);MSTRG.5820.8(158438667:158446284);Zm00001d030760_T006(158438668:158446284);Zm00001d030760_T007(158438668:158446284);Zm00001d030760_T0…
1	158432837	158432894	-	158432837	intergenic	MSTRG.5820	158432524-158446284	MSTRG.5820.1(158432524:158446284);MSTRG.5820.2(158432586:158438297);Zm00001d030760_T001(158436910:158446284);Zm00001d030760_T004(158436910:158446284);Zm00001d030760_T003(158436910:158446284);Zm00001d030760_T002(158436910:158446284);MSTRG.5820.7(158438667:158446231);MSTRG.5820.8(158438667:158446284);Zm00001d030760_T006(158438668:158446284);Zm00001d030760_T007(158438668:158446284);Zm00001d030760_T0…
1	158433125	158433158	-	158433125	intergenic	MSTRG.5820	158432524-158446284	MSTRG.5820.1(158432524:158446284);MSTRG.5820.2(158432586:158438297);Zm00001d030760_T001(158436910:158446284);Zm00001d030760_T004(158436910:158446284);Zm00001d030760_T003(158436910:158446284);Zm00001d030760_T002(158436910:158446284);MSTRG.5820.7(158438667:158446231);MSTRG.5820.8(158438667:158446284);Zm00001d030760_T006(158438668:158446284);Zm00001d030760_T007(158438668:158446284);Zm00001d030760_T0…
1	158433608	158433608	-	158433608	intergenic	MSTRG.5820	158432524-158446284	MSTRG.5820.1(158432524:158446284);MSTRG.5820.2(158432586:158438297);Zm00001d030760_T001(158436910:158446284);Zm00001d030760_T004(158436910:158446284);Zm00001d030760_T003(158436910:158446284);Zm00001d030760_T002(158436910:158446284);MSTRG.5820.7(158438667:158446231);MSTRG.5820.8(158438667:158446284);Zm00001d030760_T006(158438668:158446284);Zm00001d030760_T007(158438668:158446284);Zm00001d030760_T0…
1	158433759	158433776	-	158433759	intergenic	MSTRG.5820	158432524-158446284	MSTRG.5820.1(158432524:158446284);MSTRG.5820.2(158432586:158438297);Zm00001d030760_T001(158436910:158446284);Zm00001d030760_T004(158436910:158446284);Zm00001d030760_T003(158436910:158446284);Zm00001d030760_T002(158436910:158446284);MSTRG.5820.7(158438667:158446231);MSTRG.5820.8(158438667:158446284);Zm00001d030760_T006(158438668:158446284);Zm00001d030760_T007(158438668:158446284);Zm00001d030760_T0…
1	158433842	158433842	-	158433842	intergenic	MSTRG.5820	158432524-158446284	MSTRG.5820.1(158432524:158446284);MSTRG.5820.2(158432586:158438297);Zm00001d030760_T001(158436910:158446284);Zm00001d030760_T004(158436910:158446284);Zm00001d030760_T003(158436910:158446284);Zm00001d030760_T002(158436910:158446284);MSTRG.5820.7(158438667:158446231);MSTRG.5820.8(158438667:158446284);Zm00001d030760_T006(158438668:158446284);Zm00001d030760_T007(158438668:158446284);Zm00001d030760_T0…
1	158435915	158435915	-	158435915	intergenic	MSTRG.5820	158432524-158446284	MSTRG.5820.1(158432524:158446284);MSTRG.5820.2(158432586:158438297);Zm00001d030760_T001(158436910:158446284);Zm00001d030760_T004(158436910:158446284);Zm00001d030760_T003(158436910:158446284);Zm00001d030760_T002(158436910:158446284);MSTRG.5820.7(158438667:158446231);MSTRG.5820.8(158438667:158446284);Zm00001d030760_T006(158438668:158446284);Zm00001d030760_T007(158438668:158446284);Zm00001d030760_T0…
1	159065990	159065990	-	159065990	intergenic	MSTRG.5842	159063620-159067379	MSTRG.5842.1(159063620:159067379);MSTRG.5842.2(159063668:159067379);Zm00001d030772_T001(159066629:159067242)
1	164202614	164202614	-	164202614	intergenic	MSTRG.5941	164197167-164205396	MSTRG.5941.1(164197167:164202262);MSTRG.5941.2(164197169:164205396);MSTRG.5941.3(164197384:164202649);MSTRG.5941.4(164197616:164202649);MSTRG.5941.5(164198102:164202257)
1	164427020	164427020	-	164427020	intergenic	MSTRG.5945	164426905-164427873	MSTRG.5945.1(164426905:164427873)
1	166147328	166147328	-	166147328	intergenic	MSTRG.5970	166142088-166148070	MSTRG.5970.1(166142088:166148070)
1	166147366	166147366	-	166147366	intergenic	MSTRG.5970	166142088-166148070	MSTRG.5970.1(166142088:166148070)
1	167087109	167087109	-	167087109	intergenic	MSTRG.5999	167087073-167087650	MSTRG.5999.1(167087073:167087650)
1	168548813	168548813	-	168548813	intergenic	MSTRG.6037	168548702-168550348	MSTRG.6037.1(168548702:168550348)
1	168548875	168548898	-	168548875	intergenic	MSTRG.6037	168548702-168550348	MSTRG.6037.1(168548702:168550348)
1	168549014	168549014	-	168549014	intergenic	MSTRG.6037	168548702-168550348	MSTRG.6037.1(168548702:168550348)
1	168549052	168549052	-	168549052	intergenic	MSTRG.6037	168548702-168550348	MSTRG.6037.1(168548702:168550348)
1	172711973	172711982	-	172711973	intergenic	MSTRG.6135	172711587-172714425	MSTRG.6135.1(172711587:172714425)
1	172712071	172712071	-	172712071	intergenic	MSTRG.6135	172711587-172714425	MSTRG.6135.1(172711587:172714425)
1	175262449	175262449	-	175262449	intergenic	MSTRG.6217	175262393-175269072	MSTRG.6217.1(175262393:175268998);MSTRG.6217.2(175262426:175263634);MSTRG.6217.3(175262441:175268976);MSTRG.6217.4(175262447:175268854);Zm00001d031063_T001(175263789:175269072)
1	175262484	175262523	-	175262502	intergenic	MSTRG.6217	175262393-175269072	MSTRG.6217.1(175262393:175268998);MSTRG.6217.2(175262426:175263634);MSTRG.6217.3(175262441:175268976);MSTRG.6217.4(175262447:175268854);Zm00001d031063_T001(175263789:175269072)
1	175262579	175262630	-	175262587	intergenic	MSTRG.6217	175262393-175269072	MSTRG.6217.1(175262393:175268998);MSTRG.6217.2(175262426:175263634);MSTRG.6217.3(175262441:175268976);MSTRG.6217.4(175262447:175268854);Zm00001d031063_T001(175263789:175269072)
1	176543846	176543877	-	176543874	intergenic	MSTRG.6247	176543802-176571741	MSTRG.6247.1(176543802:176571741);MSTRG.6247.2(176543802:176571741);MSTRG.6247.3(176543821:176548471);MSTRG.6247.4(176543850:176548471);MSTRG.6247.5(176543877:176548440);MSTRG.6247.6(176543882:176548369);MSTRG.6247.7(176543884:176548436)
1	176543945	176543968	-	176543968	intergenic	MSTRG.6247	176543802-176571741	MSTRG.6247.1(176543802:176571741);MSTRG.6247.2(176543802:176571741);MSTRG.6247.3(176543821:176548471);MSTRG.6247.4(176543850:176548471);MSTRG.6247.5(176543877:176548440);MSTRG.6247.6(176543882:176548369);MSTRG.6247.7(176543884:176548436)
1	176544352	176544352	-	176544352	intergenic	MSTRG.6247	176543802-176571741	MSTRG.6247.1(176543802:176571741);MSTRG.6247.2(176543802:176571741);MSTRG.6247.3(176543821:176548471);MSTRG.6247.4(176543850:176548471);MSTRG.6247.5(176543877:176548440);MSTRG.6247.6(176543882:176548369);MSTRG.6247.7(176543884:176548436)
1	176544443	176544450	-	176544443	intergenic	MSTRG.6247	176543802-176571741	MSTRG.6247.1(176543802:176571741);MSTRG.6247.2(176543802:176571741);MSTRG.6247.3(176543821:176548471);MSTRG.6247.4(176543850:176548471);MSTRG.6247.5(176543877:176548440);MSTRG.6247.6(176543882:176548369);MSTRG.6247.7(176543884:176548436)
1	176544475	176544475	-	176544475	intergenic	MSTRG.6247	176543802-176571741	MSTRG.6247.1(176543802:176571741);MSTRG.6247.2(176543802:176571741);MSTRG.6247.3(176543821:176548471);MSTRG.6247.4(176543850:176548471);MSTRG.6247.5(176543877:176548440);MSTRG.6247.6(176543882:176548369);MSTRG.6247.7(176543884:176548436)
1	176547447	176547447	-	176547447	intergenic	MSTRG.6247	176543802-176571741	MSTRG.6247.1(176543802:176571741);MSTRG.6247.2(176543802:176571741);MSTRG.6247.3(176543821:176548471);MSTRG.6247.4(176543850:176548471);MSTRG.6247.5(176543877:176548440);MSTRG.6247.6(176543882:176548369);MSTRG.6247.7(176543884:176548436)
1	176547518	176547582	-	176547536	intergenic	MSTRG.6247	176543802-176571741	MSTRG.6247.1(176543802:176571741);MSTRG.6247.2(176543802:176571741);MSTRG.6247.3(176543821:176548471);MSTRG.6247.4(176543850:176548471);MSTRG.6247.5(176543877:176548440);MSTRG.6247.6(176543882:176548369);MSTRG.6247.7(176543884:176548436)
1	177786697	177786697	-	177786697	intergenic	MSTRG.6281	177786087-177847687	MSTRG.6281.1(177786087:177788159);MSTRG.6281.2(177786709:177847687);MSTRG.6281.3(177786709:177788126);Zm00001d031113_T001(177787270:177787941)
1	177786788	177786788	-	177786788	intergenic	MSTRG.6281	177786087-177847687	MSTRG.6281.1(177786087:177788159);MSTRG.6281.2(177786709:177847687);MSTRG.6281.3(177786709:177788126);Zm00001d031113_T001(177787270:177787941)
1	177821451	177821517	-	177821461	intergenic	MSTRG.6281;MSTRG.6285	177786087-177847687;177821413-177979419	MSTRG.6281.1(177786087:177788159);MSTRG.6281.2(177786709:177847687);MSTRG.6281.3(177786709:177788126);Zm00001d031113_T001(177787270:177787941);MSTRG.6285.1(177821413:177977619);Zm00001d031115_T001(177821450:177826536);Zm00001d031115_T002(177821452:177826445);Zm00001d031115_T003(177821452:177826539);Zm00001d031115_T004(177821454:177826482);Zm00001d031115_T005(177821458:177826492);MSTRG.6285.7(1778…
1	177821546	177821595	-	177821546	intergenic	MSTRG.6281;MSTRG.6285	177786087-177847687;177821413-177979419	MSTRG.6281.1(177786087:177788159);MSTRG.6281.2(177786709:177847687);MSTRG.6281.3(177786709:177788126);Zm00001d031113_T001(177787270:177787941);MSTRG.6285.1(177821413:177977619);Zm00001d031115_T001(177821450:177826536);Zm00001d031115_T002(177821452:177826445);Zm00001d031115_T003(177821452:177826539);Zm00001d031115_T004(177821454:177826482);Zm00001d031115_T005(177821458:177826492);MSTRG.6285.7(1778…
1	177962430	177962430	-	177962430	intergenic	MSTRG.6285	177821413-177979419	MSTRG.6285.1(177821413:177977619);Zm00001d031115_T001(177821450:177826536);Zm00001d031115_T002(177821452:177826445);Zm00001d031115_T003(177821452:177826539);Zm00001d031115_T004(177821454:177826482);Zm00001d031115_T005(177821458:177826492);MSTRG.6285.7(177823365:177979419);Zm00001d031115_T007(177823365:177829359);Zm00001d031115_T006(177823365:177826536);Zm00001d031115_T008(177825044:177826536)
1	177962459	177962485	-	177962464	intergenic	MSTRG.6285	177821413-177979419	MSTRG.6285.1(177821413:177977619);Zm00001d031115_T001(177821450:177826536);Zm00001d031115_T002(177821452:177826445);Zm00001d031115_T003(177821452:177826539);Zm00001d031115_T004(177821454:177826482);Zm00001d031115_T005(177821458:177826492);MSTRG.6285.7(177823365:177979419);Zm00001d031115_T007(177823365:177829359);Zm00001d031115_T006(177823365:177826536);Zm00001d031115_T008(177825044:177826536)
1	177962525	177962525	-	177962525	intergenic	MSTRG.6285	177821413-177979419	MSTRG.6285.1(177821413:177977619);Zm00001d031115_T001(177821450:177826536);Zm00001d031115_T002(177821452:177826445);Zm00001d031115_T003(177821452:177826539);Zm00001d031115_T004(177821454:177826482);Zm00001d031115_T005(177821458:177826492);MSTRG.6285.7(177823365:177979419);Zm00001d031115_T007(177823365:177829359);Zm00001d031115_T006(177823365:177826536);Zm00001d031115_T008(177825044:177826536)
1	177962564	177962564	-	177962564	intergenic	MSTRG.6285	177821413-177979419	MSTRG.6285.1(177821413:177977619);Zm00001d031115_T001(177821450:177826536);Zm00001d031115_T002(177821452:177826445);Zm00001d031115_T003(177821452:177826539);Zm00001d031115_T004(177821454:177826482);Zm00001d031115_T005(177821458:177826492);MSTRG.6285.7(177823365:177979419);Zm00001d031115_T007(177823365:177829359);Zm00001d031115_T006(177823365:177826536);Zm00001d031115_T008(177825044:177826536)
1	177973029	177973029	-	177973029	intergenic	MSTRG.6285	177821413-177979419	MSTRG.6285.1(177821413:177977619);Zm00001d031115_T001(177821450:177826536);Zm00001d031115_T002(177821452:177826445);Zm00001d031115_T003(177821452:177826539);Zm00001d031115_T004(177821454:177826482);Zm00001d031115_T005(177821458:177826492);MSTRG.6285.7(177823365:177979419);Zm00001d031115_T007(177823365:177829359);Zm00001d031115_T006(177823365:177826536);Zm00001d031115_T008(177825044:177826536)
1	177974102	177974117	-	177974104	intergenic	MSTRG.6285	177821413-177979419	MSTRG.6285.1(177821413:177977619);Zm00001d031115_T001(177821450:177826536);Zm00001d031115_T002(177821452:177826445);Zm00001d031115_T003(177821452:177826539);Zm00001d031115_T004(177821454:177826482);Zm00001d031115_T005(177821458:177826492);MSTRG.6285.7(177823365:177979419);Zm00001d031115_T007(177823365:177829359);Zm00001d031115_T006(177823365:177826536);Zm00001d031115_T008(177825044:177826536)
1	177974162	177974162	-	177974162	intergenic	MSTRG.6285	177821413-177979419	MSTRG.6285.1(177821413:177977619);Zm00001d031115_T001(177821450:177826536);Zm00001d031115_T002(177821452:177826445);Zm00001d031115_T003(177821452:177826539);Zm00001d031115_T004(177821454:177826482);Zm00001d031115_T005(177821458:177826492);MSTRG.6285.7(177823365:177979419);Zm00001d031115_T007(177823365:177829359);Zm00001d031115_T006(177823365:177826536);Zm00001d031115_T008(177825044:177826536)
1	178803307	178803307	-	178803307	intergenic	MSTRG.6296	178716251-178805508	MSTRG.6296.1(178716251:178803537);MSTRG.6296.2(178797915:178805508);MSTRG.6296.3(178797915:178805508);MSTRG.6296.4(178797944:178803588);Zm00001d031129_T001(178803787:178805508)
1	180013651	180013662	-	180013651	intergenic	MSTRG.6335	180013624-180014518	MSTRG.6335.1(180013624:180014518)
1	180440796	180440796	-	180440796	intergenic	MSTRG.6349	180369693-180502998	Zm00001d031164_T001(180369693:180371167);MSTRG.6349.2(180369924:180448186);Zm00001d031168_T001(180447018:180448137);MSTRG.6349.4(180447118:180449054);MSTRG.6349.5(180447118:180448137);MSTRG.6349.6(180447118:180448137);MSTRG.6349.7(180447144:180448109);MSTRG.6349.8(180447145:180448025);MSTRG.6349.9(180447145:180448117);MSTRG.6349.10(180447146:180448137);MSTRG.6349.11(180447149:180448113);MSTRG.634…
1	180463637	180463637	-	180463637	intergenic	MSTRG.6349	180369693-180502998	Zm00001d031164_T001(180369693:180371167);MSTRG.6349.2(180369924:180448186);Zm00001d031168_T001(180447018:180448137);MSTRG.6349.4(180447118:180449054);MSTRG.6349.5(180447118:180448137);MSTRG.6349.6(180447118:180448137);MSTRG.6349.7(180447144:180448109);MSTRG.6349.8(180447145:180448025);MSTRG.6349.9(180447145:180448117);MSTRG.6349.10(180447146:180448137);MSTRG.6349.11(180447149:180448113);MSTRG.634…
1	181153272	181153314	-	181153289	intergenic	MSTRG.6359	181153206-181156369	MSTRG.6359.1(181153206:181156362);Zm00001d031175_T001(181154824:181156369)
1	181153339	181153348	-	181153339	intergenic	MSTRG.6359	181153206-181156369	MSTRG.6359.1(181153206:181156362);Zm00001d031175_T001(181154824:181156369)
1	181153378	181153406	-	181153378	intergenic	MSTRG.6359	181153206-181156369	MSTRG.6359.1(181153206:181156362);Zm00001d031175_T001(181154824:181156369)
1	181589715	181589715	-	181589715	intergenic	MSTRG.6367	181585142-181590416	MSTRG.6367.1(181585142:181590416);MSTRG.6367.2(181585162:181589761);MSTRG.6367.3(181585190:181586170);Zm00001d031184_T001(181585445:181586170)
1	181968138	181968138	-	181968138	intergenic	MSTRG.6393	181967932-181968202	MSTRG.6393.1(181967932:181968202)
1	184902496	184902518	-	184902518	intergenic	MSTRG.6521	184900753-184904973	MSTRG.6521.1(184900753:184904973);Zm00001d031280_T001(184903195:184904973)
1	184902578	184902578	-	184902578	intergenic	MSTRG.6521	184900753-184904973	MSTRG.6521.1(184900753:184904973);Zm00001d031280_T001(184903195:184904973)
1	184902632	184902632	-	184902632	intergenic	MSTRG.6521	184900753-184904973	MSTRG.6521.1(184900753:184904973);Zm00001d031280_T001(184903195:184904973)
1	184902662	184902662	-	184902662	intergenic	MSTRG.6521	184900753-184904973	MSTRG.6521.1(184900753:184904973);Zm00001d031280_T001(184903195:184904973)
1	184921922	184921923	-	184921922	intergenic	MSTRG.6523	184921808-184926172	MSTRG.6523.1(184921808:184926172);MSTRG.6523.2(184921875:184926172);MSTRG.6523.3(184921959:184926172);Zm00001d031281_T001(184924382:184926172)
1	184922017	184922130	-	184922076	intergenic	MSTRG.6523	184921808-184926172	MSTRG.6523.1(184921808:184926172);MSTRG.6523.2(184921875:184926172);MSTRG.6523.3(184921959:184926172);Zm00001d031281_T001(184924382:184926172)
1	184923774	184923774	-	184923774	intergenic	MSTRG.6523	184921808-184926172	MSTRG.6523.1(184921808:184926172);MSTRG.6523.2(184921875:184926172);MSTRG.6523.3(184921959:184926172);Zm00001d031281_T001(184924382:184926172)
1	184923833	184923833	-	184923833	intergenic	MSTRG.6523	184921808-184926172	MSTRG.6523.1(184921808:184926172);MSTRG.6523.2(184921875:184926172);MSTRG.6523.3(184921959:184926172);Zm00001d031281_T001(184924382:184926172)
1	185848761	185848761	-	185848761	intergenic	MSTRG.6562	185848697-185850288	MSTRG.6562.1(185848697:185850081);MSTRG.6562.2(185848702:185850288);MSTRG.6562.3(185848763:185850081);Zm00001d031311_T001(185849377:185850081)
1	185848817	185848882	-	185848862	intergenic	MSTRG.6562	185848697-185850288	MSTRG.6562.1(185848697:185850081);MSTRG.6562.2(185848702:185850288);MSTRG.6562.3(185848763:185850081);Zm00001d031311_T001(185849377:185850081)
1	186792559	186792579	-	186792579	intergenic	MSTRG.6619	186792512-186794141	MSTRG.6619.1(186792512:186794141)
1	186792634	186792648	-	186792648	intergenic	MSTRG.6619	186792512-186794141	MSTRG.6619.1(186792512:186794141)
1	186792688	186792688	-	186792688	intergenic	MSTRG.6619	186792512-186794141	MSTRG.6619.1(186792512:186794141)
1	186792734	186792734	-	186792734	intergenic	MSTRG.6619	186792512-186794141	MSTRG.6619.1(186792512:186794141)
1	186793446	186793446	-	186793446	intergenic	MSTRG.6619	186792512-186794141	MSTRG.6619.1(186792512:186794141)
1	186793482	186793542	-	186793516	intergenic	MSTRG.6619	186792512-186794141	MSTRG.6619.1(186792512:186794141)
1	186793608	186793608	-	186793608	intergenic	MSTRG.6619	186792512-186794141	MSTRG.6619.1(186792512:186794141)
1	187380942	187380942	-	187380942	intergenic	MSTRG.6634	187377987-187396238	MSTRG.6634.1(187377987:187396214);MSTRG.6634.2(187377987:187381757);MSTRG.6634.3(187377987:187381757);MSTRG.6634.4(187377987:187381737);MSTRG.6634.5(187377987:187396238);MSTRG.6634.6(187377987:187381737)
1	190545382	190545382	-	190545382	intergenic	MSTRG.6736	190545370-190558314	MSTRG.6736.1(190545370:190558314);MSTRG.6736.2(190545389:190558179);MSTRG.6736.3(190545421:190558172);Zm00001d031453_T001(190556791:190558314)
1	192568106	192568134	-	192568113	intergenic	MSTRG.6816	192567895-192568329	MSTRG.6816.1(192567895:192568329)
1	193514615	193514712	-	193514658	intergenic	MSTRG.6853	193514614-193560975	MSTRG.6853.1(193514614:193560975)
1	193514774	193514774	-	193514774	intergenic	MSTRG.6853	193514614-193560975	MSTRG.6853.1(193514614:193560975)
1	193619725	193619725	-	193619725	intergenic	MSTRG.6855	193595881-193622803	MSTRG.6855.1(193595881:193622699);MSTRG.6855.2(193595883:193622764);MSTRG.6855.3(193620342:193622698);MSTRG.6855.4(193620437:193622767);MSTRG.6855.5(193620437:193622801);MSTRG.6855.6(193620437:193622797);Zm00001d031536_T001(193620437:193622803);MSTRG.6855.8(193620437:193622801);MSTRG.6855.9(193620437:193622749);MSTRG.6855.10(193621241:193622700)
1	193619807	193619807	-	193619807	intergenic	MSTRG.6855	193595881-193622803	MSTRG.6855.1(193595881:193622699);MSTRG.6855.2(193595883:193622764);MSTRG.6855.3(193620342:193622698);MSTRG.6855.4(193620437:193622767);MSTRG.6855.5(193620437:193622801);MSTRG.6855.6(193620437:193622797);Zm00001d031536_T001(193620437:193622803);MSTRG.6855.8(193620437:193622801);MSTRG.6855.9(193620437:193622749);MSTRG.6855.10(193621241:193622700)
1	193619989	193619989	-	193619989	intergenic	MSTRG.6855	193595881-193622803	MSTRG.6855.1(193595881:193622699);MSTRG.6855.2(193595883:193622764);MSTRG.6855.3(193620342:193622698);MSTRG.6855.4(193620437:193622767);MSTRG.6855.5(193620437:193622801);MSTRG.6855.6(193620437:193622797);Zm00001d031536_T001(193620437:193622803);MSTRG.6855.8(193620437:193622801);MSTRG.6855.9(193620437:193622749);MSTRG.6855.10(193621241:193622700)
1	193620041	193620059	-	193620041	intergenic	MSTRG.6855	193595881-193622803	MSTRG.6855.1(193595881:193622699);MSTRG.6855.2(193595883:193622764);MSTRG.6855.3(193620342:193622698);MSTRG.6855.4(193620437:193622767);MSTRG.6855.5(193620437:193622801);MSTRG.6855.6(193620437:193622797);Zm00001d031536_T001(193620437:193622803);MSTRG.6855.8(193620437:193622801);MSTRG.6855.9(193620437:193622749);MSTRG.6855.10(193621241:193622700)
1	193620098	193620098	-	193620098	intergenic	MSTRG.6855	193595881-193622803	MSTRG.6855.1(193595881:193622699);MSTRG.6855.2(193595883:193622764);MSTRG.6855.3(193620342:193622698);MSTRG.6855.4(193620437:193622767);MSTRG.6855.5(193620437:193622801);MSTRG.6855.6(193620437:193622797);Zm00001d031536_T001(193620437:193622803);MSTRG.6855.8(193620437:193622801);MSTRG.6855.9(193620437:193622749);MSTRG.6855.10(193621241:193622700)
1	193620150	193620150	-	193620150	intergenic	MSTRG.6855	193595881-193622803	MSTRG.6855.1(193595881:193622699);MSTRG.6855.2(193595883:193622764);MSTRG.6855.3(193620342:193622698);MSTRG.6855.4(193620437:193622767);MSTRG.6855.5(193620437:193622801);MSTRG.6855.6(193620437:193622797);Zm00001d031536_T001(193620437:193622803);MSTRG.6855.8(193620437:193622801);MSTRG.6855.9(193620437:193622749);MSTRG.6855.10(193621241:193622700)
1	194368477	194368477	-	194368477	intergenic	MSTRG.6902	194368428-194371395	MSTRG.6902.1(194368428:194371369);Zm00001d031562_T001(194370600:194371395)
1	194368604	194368639	-	194368617	intergenic	MSTRG.6902	194368428-194371395	MSTRG.6902.1(194368428:194371369);Zm00001d031562_T001(194370600:194371395)
1	195615392	195615392	-	195615392	intergenic	MSTRG.6940	195612244-195616017	MSTRG.6940.1(195612244:195616017);MSTRG.6940.2(195612244:195616017);MSTRG.6940.3(195612251:195616017);Zm00001d022889_T001(195612251:195613008)
1	196536502	196536507	-	196536505	intergenic	MSTRG.6977	196536488-196540337	MSTRG.6977.1(196536488:196540337);MSTRG.6977.2(196536488:196540337);MSTRG.6977.3(196536494:196539893);MSTRG.6977.4(196536498:196539066);MSTRG.6977.5(196536505:196539870);MSTRG.6977.6(196536506:196540282);MSTRG.6977.7(196536509:196540155);MSTRG.6977.8(196536510:196538802);MSTRG.6977.9(196536512:196540266);MSTRG.6977.10(196537265:196538789)
1	196536546	196536546	-	196536546	intergenic	MSTRG.6977	196536488-196540337	MSTRG.6977.1(196536488:196540337);MSTRG.6977.2(196536488:196540337);MSTRG.6977.3(196536494:196539893);MSTRG.6977.4(196536498:196539066);MSTRG.6977.5(196536505:196539870);MSTRG.6977.6(196536506:196540282);MSTRG.6977.7(196536509:196540155);MSTRG.6977.8(196536510:196538802);MSTRG.6977.9(196536512:196540266);MSTRG.6977.10(196537265:196538789)
1	196537277	196537277	-	196537277	intergenic	MSTRG.6977	196536488-196540337	MSTRG.6977.1(196536488:196540337);MSTRG.6977.2(196536488:196540337);MSTRG.6977.3(196536494:196539893);MSTRG.6977.4(196536498:196539066);MSTRG.6977.5(196536505:196539870);MSTRG.6977.6(196536506:196540282);MSTRG.6977.7(196536509:196540155);MSTRG.6977.8(196536510:196538802);MSTRG.6977.9(196536512:196540266);MSTRG.6977.10(196537265:196538789)
1	197547474	197547474	-	197547474	intergenic	MSTRG.7023	197545264-197548951	MSTRG.7023.1(197545264:197548951);MSTRG.7023.2(197545580:197548777);MSTRG.7023.3(197546059:197548757)
1	198160890	198160905	-	198160905	intergenic	MSTRG.7053	198159715-198163543	MSTRG.7053.1(198159715:198163543);MSTRG.7053.2(198159715:198163543);MSTRG.7053.3(198159767:198161876);MSTRG.7053.4(198159767:198163543);MSTRG.7053.5(198159767:198161839);MSTRG.7053.6(198159767:198163543);MSTRG.7053.7(198159767:198162258)
1	198705013	198705013	-	198705013	intergenic	MSTRG.7086	198686628-198750068	MSTRG.7086.1(198686628:198750044);MSTRG.7086.2(198748114:198750068)
1	199411350	199411361	-	199411350	intergenic	MSTRG.7120	199320554-199418747	MSTRG.7120.1(199320554:199418747);MSTRG.7120.2(199326367:199418747)
1	199411412	199411412	-	199411412	intergenic	MSTRG.7120	199320554-199418747	MSTRG.7120.1(199320554:199418747);MSTRG.7120.2(199326367:199418747)
1	199411545	199411558	-	199411545	intergenic	MSTRG.7120	199320554-199418747	MSTRG.7120.1(199320554:199418747);MSTRG.7120.2(199326367:199418747)
1	199518854	199518879	-	199518869	intergenic	MSTRG.7130	199518022-199526686	MSTRG.7130.1(199518022:199526288);MSTRG.7130.2(199518825:199526307);MSTRG.7130.3(199518898:199526686);MSTRG.7130.4(199518911:199526461);MSTRG.7130.5(199518911:199526498);MSTRG.7130.6(199518911:199526303);MSTRG.7130.7(199518942:199526432);MSTRG.7130.8(199519095:199526289);MSTRG.7130.9(199519298:199526450);MSTRG.7130.10(199519298:199526450);MSTRG.7130.11(199519355:199526329);MSTRG.7130.12(199519412…
1	199518951	199518969	-	199518951	intergenic	MSTRG.7130	199518022-199526686	MSTRG.7130.1(199518022:199526288);MSTRG.7130.2(199518825:199526307);MSTRG.7130.3(199518898:199526686);MSTRG.7130.4(199518911:199526461);MSTRG.7130.5(199518911:199526498);MSTRG.7130.6(199518911:199526303);MSTRG.7130.7(199518942:199526432);MSTRG.7130.8(199519095:199526289);MSTRG.7130.9(199519298:199526450);MSTRG.7130.10(199519298:199526450);MSTRG.7130.11(199519355:199526329);MSTRG.7130.12(199519412…
1	199519414	199519414	-	199519414	intergenic	MSTRG.7130	199518022-199526686	MSTRG.7130.1(199518022:199526288);MSTRG.7130.2(199518825:199526307);MSTRG.7130.3(199518898:199526686);MSTRG.7130.4(199518911:199526461);MSTRG.7130.5(199518911:199526498);MSTRG.7130.6(199518911:199526303);MSTRG.7130.7(199518942:199526432);MSTRG.7130.8(199519095:199526289);MSTRG.7130.9(199519298:199526450);MSTRG.7130.10(199519298:199526450);MSTRG.7130.11(199519355:199526329);MSTRG.7130.12(199519412…
1	199519461	199519468	-	199519468	intergenic	MSTRG.7130	199518022-199526686	MSTRG.7130.1(199518022:199526288);MSTRG.7130.2(199518825:199526307);MSTRG.7130.3(199518898:199526686);MSTRG.7130.4(199518911:199526461);MSTRG.7130.5(199518911:199526498);MSTRG.7130.6(199518911:199526303);MSTRG.7130.7(199518942:199526432);MSTRG.7130.8(199519095:199526289);MSTRG.7130.9(199519298:199526450);MSTRG.7130.10(199519298:199526450);MSTRG.7130.11(199519355:199526329);MSTRG.7130.12(199519412…
1	199519494	199519494	-	199519494	intergenic	MSTRG.7130	199518022-199526686	MSTRG.7130.1(199518022:199526288);MSTRG.7130.2(199518825:199526307);MSTRG.7130.3(199518898:199526686);MSTRG.7130.4(199518911:199526461);MSTRG.7130.5(199518911:199526498);MSTRG.7130.6(199518911:199526303);MSTRG.7130.7(199518942:199526432);MSTRG.7130.8(199519095:199526289);MSTRG.7130.9(199519298:199526450);MSTRG.7130.10(199519298:199526450);MSTRG.7130.11(199519355:199526329);MSTRG.7130.12(199519412…
1	199519621	199519623	-	199519621	intergenic	MSTRG.7130	199518022-199526686	MSTRG.7130.1(199518022:199526288);MSTRG.7130.2(199518825:199526307);MSTRG.7130.3(199518898:199526686);MSTRG.7130.4(199518911:199526461);MSTRG.7130.5(199518911:199526498);MSTRG.7130.6(199518911:199526303);MSTRG.7130.7(199518942:199526432);MSTRG.7130.8(199519095:199526289);MSTRG.7130.9(199519298:199526450);MSTRG.7130.10(199519298:199526450);MSTRG.7130.11(199519355:199526329);MSTRG.7130.12(199519412…
1	199523195	199523195	-	199523195	intergenic	MSTRG.7130	199518022-199526686	MSTRG.7130.1(199518022:199526288);MSTRG.7130.2(199518825:199526307);MSTRG.7130.3(199518898:199526686);MSTRG.7130.4(199518911:199526461);MSTRG.7130.5(199518911:199526498);MSTRG.7130.6(199518911:199526303);MSTRG.7130.7(199518942:199526432);MSTRG.7130.8(199519095:199526289);MSTRG.7130.9(199519298:199526450);MSTRG.7130.10(199519298:199526450);MSTRG.7130.11(199519355:199526329);MSTRG.7130.12(199519412…
1	200051986	200052018	-	200052000	intergenic	MSTRG.7145	200051942-200054187	MSTRG.7145.1(200051942:200054134);MSTRG.7145.2(200052320:200054187);Zm00001d031732_T001(200052338:200054134)
1	200052062	200052084	-	200052062	intergenic	MSTRG.7145	200051942-200054187	MSTRG.7145.1(200051942:200054134);MSTRG.7145.2(200052320:200054187);Zm00001d031732_T001(200052338:200054134)
1	200052124	200052145	-	200052145	intergenic	MSTRG.7145	200051942-200054187	MSTRG.7145.1(200051942:200054134);MSTRG.7145.2(200052320:200054187);Zm00001d031732_T001(200052338:200054134)
1	200165662	200165683	-	200165662	intergenic	MSTRG.7151	200165645-200166920	MSTRG.7151.1(200165645:200166920)
1	200166052	200166059	-	200166059	intergenic	MSTRG.7151	200165645-200166920	MSTRG.7151.1(200165645:200166920)
1	200166434	200166438	-	200166434	intergenic	MSTRG.7151	200165645-200166920	MSTRG.7151.1(200165645:200166920)
1	200166469	200166469	-	200166469	intergenic	MSTRG.7151	200165645-200166920	MSTRG.7151.1(200165645:200166920)
1	200259907	200259923	-	200259923	intergenic	MSTRG.7153	200259882-200262141	MSTRG.7153.1(200259882:200261926);MSTRG.7153.2(200259882:200261370);MSTRG.7153.3(200259910:200262141);Zm00001d031737_T001(200260170:200262141)
1	200259960	200259960	-	200259960	intergenic	MSTRG.7153	200259882-200262141	MSTRG.7153.1(200259882:200261926);MSTRG.7153.2(200259882:200261370);MSTRG.7153.3(200259910:200262141);Zm00001d031737_T001(200260170:200262141)
1	202115383	202115383	-	202115383	intergenic	MSTRG.7221	202105217-202116537	MSTRG.7221.1(202105217:202116238);MSTRG.7221.2(202115665:202116537)
1	202115675	202115675	-	202115675	intergenic	MSTRG.7221	202105217-202116537	MSTRG.7221.1(202105217:202116238);MSTRG.7221.2(202115665:202116537)
1	202115831	202115831	-	202115831	intergenic	MSTRG.7221	202105217-202116537	MSTRG.7221.1(202105217:202116238);MSTRG.7221.2(202115665:202116537)
1	202115884	202115899	-	202115885	intergenic	MSTRG.7221	202105217-202116537	MSTRG.7221.1(202105217:202116238);MSTRG.7221.2(202115665:202116537)
1	202115929	202115929	-	202115929	intergenic	MSTRG.7221	202105217-202116537	MSTRG.7221.1(202105217:202116238);MSTRG.7221.2(202115665:202116537)
1	202182314	202182314	-	202182314	intergenic	MSTRG.7227	202182243-202183166	MSTRG.7227.1(202182243:202183166)
1	202749794	202749794	-	202749794	intergenic	MSTRG.7256	202749750-202757086	MSTRG.7256.1(202749750:202757086);MSTRG.7256.2(202749773:202757042);MSTRG.7256.3(202749788:202756981);MSTRG.7256.4(202749816:202757004);MSTRG.7256.5(202749817:202757025);Zm00001d031816_T001(202751686:202757066);Zm00001d031816_T002(202755686:202757066)
1	202749872	202749873	-	202749872	intergenic	MSTRG.7256	202749750-202757086	MSTRG.7256.1(202749750:202757086);MSTRG.7256.2(202749773:202757042);MSTRG.7256.3(202749788:202756981);MSTRG.7256.4(202749816:202757004);MSTRG.7256.5(202749817:202757025);Zm00001d031816_T001(202751686:202757066);Zm00001d031816_T002(202755686:202757066)
1	202749918	202749988	-	202749931	intergenic	MSTRG.7256	202749750-202757086	MSTRG.7256.1(202749750:202757086);MSTRG.7256.2(202749773:202757042);MSTRG.7256.3(202749788:202756981);MSTRG.7256.4(202749816:202757004);MSTRG.7256.5(202749817:202757025);Zm00001d031816_T001(202751686:202757066);Zm00001d031816_T002(202755686:202757066)
1	202982194	202982194	-	202982194	intergenic	MSTRG.7266	202982111-202992389	MSTRG.7266.1(202982111:202992389);Zm00001d031824_T001(202983117:202992232);Zm00001d031824_T002(202983177:202992161);Zm00001d031824_T003(202983177:202992217)
1	202982276	202982276	-	202982276	intergenic	MSTRG.7266	202982111-202992389	MSTRG.7266.1(202982111:202992389);Zm00001d031824_T001(202983117:202992232);Zm00001d031824_T002(202983177:202992161);Zm00001d031824_T003(202983177:202992217)
1	204516639	204516660	-	204516639	intergenic	MSTRG.7326	204513080-204518061	MSTRG.7326.1(204513080:204518061);MSTRG.7326.2(204516695:204517987)
1	204517527	204517527	-	204517527	intergenic	MSTRG.7326	204513080-204518061	MSTRG.7326.1(204513080:204518061);MSTRG.7326.2(204516695:204517987)
1	205246215	205246215	-	205246215	intergenic	MSTRG.7351	205246185-205246602	MSTRG.7351.1(205246185:205246602)
1	205246255	205246255	-	205246255	intergenic	MSTRG.7351	205246185-205246602	MSTRG.7351.1(205246185:205246602)
1	205246340	205246342	-	205246342	intergenic	MSTRG.7351	205246185-205246602	MSTRG.7351.1(205246185:205246602)
1	205246499	205246501	-	205246499	intergenic	MSTRG.7351	205246185-205246602	MSTRG.7351.1(205246185:205246602)
1	205249637	205249638	-	205249637	intergenic	MSTRG.7352	205247059-205253194	MSTRG.7352.1(205247059:205253194);MSTRG.7352.2(205250057:205251386)
1	205249969	205249978	-	205249978	intergenic	MSTRG.7352	205247059-205253194	MSTRG.7352.1(205247059:205253194);MSTRG.7352.2(205250057:205251386)
1	205443912	205443917	-	205443912	intergenic	MSTRG.7367	205443488-205444290	MSTRG.7367.1(205443488:205444290)
1	207518310	207518310	-	207518310	intergenic	MSTRG.7427	207515536-207596479	MSTRG.7427.1(207515536:207596479);Zm00001d031939_T001(207515536:207517495);Zm00001d031939_T002(207515574:207517489);Zm00001d031939_T003(207515629:207517414);MSTRG.7427.5(207515636:207517485);MSTRG.7427.6(207515636:207517485)
1	207518337	207518337	-	207518337	intergenic	MSTRG.7427	207515536-207596479	MSTRG.7427.1(207515536:207596479);Zm00001d031939_T001(207515536:207517495);Zm00001d031939_T002(207515574:207517489);Zm00001d031939_T003(207515629:207517414);MSTRG.7427.5(207515636:207517485);MSTRG.7427.6(207515636:207517485)
1	207518385	207518601	-	207518531	intergenic	MSTRG.7427	207515536-207596479	MSTRG.7427.1(207515536:207596479);Zm00001d031939_T001(207515536:207517495);Zm00001d031939_T002(207515574:207517489);Zm00001d031939_T003(207515629:207517414);MSTRG.7427.5(207515636:207517485);MSTRG.7427.6(207515636:207517485)
1	207964626	207964626	-	207964626	intergenic	MSTRG.7455	207955044-207967434	Zm00001d031956_T001(207955044:207958694);Zm00001d031956_T002(207955044:207958736);Zm00001d031957_T001(207955121:207958827);Zm00001d031956_T003(207955206:207958652);Zm00001d031956_T004(207955207:207956235);MSTRG.7455.6(207955225:207967434);Zm00001d031956_T005(207955225:207958689);Zm00001d031956_T006(207955252:207958701)
1	208835161	208835161	-	208835161	intergenic	MSTRG.7495	208746833-208839440	MSTRG.7495.1(208746833:208839422);MSTRG.7495.2(208746944:208839440);MSTRG.7495.3(208746944:208839319);MSTRG.7495.4(208746944:208839315);MSTRG.7495.5(208746944:208839316);MSTRG.7495.6(208746944:208839319);MSTRG.7495.7(208746944:208839315);MSTRG.7495.8(208746944:208839438);MSTRG.7495.9(208746944:208839338);MSTRG.7495.10(208746944:208753525);MSTRG.7495.11(208746944:208838950);Zm00001d031986_T001(208…
1	209130494	209130494	-	209130494	intergenic	MSTRG.7512	209130379-209168728	MSTRG.7512.1(209130379:209165722);MSTRG.7512.2(209132413:209168703);MSTRG.7512.3(209132413:209139272);MSTRG.7512.4(209132488:209139231);MSTRG.7512.5(209132671:209139179);MSTRG.7512.6(209132715:209168728);MSTRG.7512.7(209154679:209164286);MSTRG.7512.8(209154830:209168728);MSTRG.7512.9(209154851:209166391);MSTRG.7512.10(209154852:209168691);MSTRG.7512.11(209154860:209168698);MSTRG.7512.12(209154878…
1	209144105	209144108	-	209144107	intergenic	MSTRG.7512	209130379-209168728	MSTRG.7512.1(209130379:209165722);MSTRG.7512.2(209132413:209168703);MSTRG.7512.3(209132413:209139272);MSTRG.7512.4(209132488:209139231);MSTRG.7512.5(209132671:209139179);MSTRG.7512.6(209132715:209168728);MSTRG.7512.7(209154679:209164286);MSTRG.7512.8(209154830:209168728);MSTRG.7512.9(209154851:209166391);MSTRG.7512.10(209154852:209168691);MSTRG.7512.11(209154860:209168698);MSTRG.7512.12(209154878…
1	209144176	209144176	-	209144176	intergenic	MSTRG.7512	209130379-209168728	MSTRG.7512.1(209130379:209165722);MSTRG.7512.2(209132413:209168703);MSTRG.7512.3(209132413:209139272);MSTRG.7512.4(209132488:209139231);MSTRG.7512.5(209132671:209139179);MSTRG.7512.6(209132715:209168728);MSTRG.7512.7(209154679:209164286);MSTRG.7512.8(209154830:209168728);MSTRG.7512.9(209154851:209166391);MSTRG.7512.10(209154852:209168691);MSTRG.7512.11(209154860:209168698);MSTRG.7512.12(209154878…
1	209155053	209155053	-	209155053	intergenic	MSTRG.7512	209130379-209168728	MSTRG.7512.1(209130379:209165722);MSTRG.7512.2(209132413:209168703);MSTRG.7512.3(209132413:209139272);MSTRG.7512.4(209132488:209139231);MSTRG.7512.5(209132671:209139179);MSTRG.7512.6(209132715:209168728);MSTRG.7512.7(209154679:209164286);MSTRG.7512.8(209154830:209168728);MSTRG.7512.9(209154851:209166391);MSTRG.7512.10(209154852:209168691);MSTRG.7512.11(209154860:209168698);MSTRG.7512.12(209154878…
1	209158999	209158999	-	209158999	intergenic	MSTRG.7512	209130379-209168728	MSTRG.7512.1(209130379:209165722);MSTRG.7512.2(209132413:209168703);MSTRG.7512.3(209132413:209139272);MSTRG.7512.4(209132488:209139231);MSTRG.7512.5(209132671:209139179);MSTRG.7512.6(209132715:209168728);MSTRG.7512.7(209154679:209164286);MSTRG.7512.8(209154830:209168728);MSTRG.7512.9(209154851:209166391);MSTRG.7512.10(209154852:209168691);MSTRG.7512.11(209154860:209168698);MSTRG.7512.12(209154878…
1	211482865	211482865	-	211482865	intergenic	MSTRG.7603	211482843-211497588	MSTRG.7603.1(211482843:211497523);Zm00001d032073_T001(211494652:211497588)
1	211482908	211482933	-	211482927	intergenic	MSTRG.7603	211482843-211497588	MSTRG.7603.1(211482843:211497523);Zm00001d032073_T001(211494652:211497588)
1	211482973	211482981	-	211482981	intergenic	MSTRG.7603	211482843-211497588	MSTRG.7603.1(211482843:211497523);Zm00001d032073_T001(211494652:211497588)
1	211483014	211483033	-	211483020	intergenic	MSTRG.7603	211482843-211497588	MSTRG.7603.1(211482843:211497523);Zm00001d032073_T001(211494652:211497588)
1	211564944	211565025	-	211565001	intergenic	MSTRG.7606	211564928-211565574	MSTRG.7606.1(211564928:211565574)
1	211565066	211565085	-	211565066	intergenic	MSTRG.7606	211564928-211565574	MSTRG.7606.1(211564928:211565574)
1	211565838	211565844	-	211565844	intergenic	MSTRG.7607	211565788-211568228	MSTRG.7607.1(211565788:211568228);MSTRG.7607.2(211565789:211568228);Zm00001d032075_T001(211566333:211568228)
1	212110619	212110641	-	212110638	intergenic	MSTRG.7625	212110597-212112423	MSTRG.7625.1(212110597:212112423);MSTRG.7625.2(212110597:212112423);MSTRG.7625.3(212110620:212112423);Zm00001d032084_T001(212111364:212112423)
1	212237884	212237884	-	212237884	intergenic	MSTRG.7630	212207299-212315422	MSTRG.7630.1(212207299:212249443);Zm00001d032088_T001(212207299:212207712);MSTRG.7630.3(212248690:212315422);Zm00001d032091_T001(212248940:212249338);Zm00001d032094_T001(212314858:212315259)
1	212251724	212251724	-	212251724	intergenic	MSTRG.7630	212207299-212315422	MSTRG.7630.1(212207299:212249443);Zm00001d032088_T001(212207299:212207712);MSTRG.7630.3(212248690:212315422);Zm00001d032091_T001(212248940:212249338);Zm00001d032094_T001(212314858:212315259)
1	212251855	212251855	-	212251855	intergenic	MSTRG.7630	212207299-212315422	MSTRG.7630.1(212207299:212249443);Zm00001d032088_T001(212207299:212207712);MSTRG.7630.3(212248690:212315422);Zm00001d032091_T001(212248940:212249338);Zm00001d032094_T001(212314858:212315259)
1	212300199	212300199	-	212300199	intergenic	MSTRG.7630	212207299-212315422	MSTRG.7630.1(212207299:212249443);Zm00001d032088_T001(212207299:212207712);MSTRG.7630.3(212248690:212315422);Zm00001d032091_T001(212248940:212249338);Zm00001d032094_T001(212314858:212315259)
1	213516758	213516758	-	213516758	intergenic	MSTRG.7675	213516720-213517509	MSTRG.7675.1(213516720:213517509);MSTRG.7675.2(213516774:213517416)
1	214319090	214319090	-	214319090	intergenic	MSTRG.7705	214317230-214319324	MSTRG.7705.1(214317230:214319324)
1	214431843	214431850	-	214431843	intergenic	MSTRG.7712	214429595-214438401	MSTRG.7712.1(214429595:214438401);MSTRG.7712.2(214429595:214438346);MSTRG.7712.3(214431514:214438401);MSTRG.7712.4(214431514:214438387);Zm00001d032146_T001(214436611:214438401);Zm00001d032146_T002(214437352:214438401)
1	214432648	214432648	-	214432648	intergenic	MSTRG.7712	214429595-214438401	MSTRG.7712.1(214429595:214438401);MSTRG.7712.2(214429595:214438346);MSTRG.7712.3(214431514:214438401);MSTRG.7712.4(214431514:214438387);Zm00001d032146_T001(214436611:214438401);Zm00001d032146_T002(214437352:214438401)
1	214576465	214576465	-	214576465	intergenic	MSTRG.7720	214573491-214584860	MSTRG.7720.1(214573491:214584824);Zm00001d032153_T001(214578151:214584860);Zm00001d032153_T002(214578680:214584860)
1	214576985	214576985	-	214576985	intergenic	MSTRG.7720	214573491-214584860	MSTRG.7720.1(214573491:214584824);Zm00001d032153_T001(214578151:214584860);Zm00001d032153_T002(214578680:214584860)
1	217179512	217179616	-	217179578	intergenic	MSTRG.7807	217179503-217182735	MSTRG.7807.1(217179503:217182735);MSTRG.7807.2(217179503:217182735);MSTRG.7807.3(217179515:217182735);Zm00001d032209_T002(217181039:217182735);Zm00001d032209_T001(217181039:217182292)
1	217179668	217179693	-	217179685	intergenic	MSTRG.7807	217179503-217182735	MSTRG.7807.1(217179503:217182735);MSTRG.7807.2(217179503:217182735);MSTRG.7807.3(217179515:217182735);Zm00001d032209_T002(217181039:217182735);Zm00001d032209_T001(217181039:217182292)
1	217179751	217179751	-	217179751	intergenic	MSTRG.7807	217179503-217182735	MSTRG.7807.1(217179503:217182735);MSTRG.7807.2(217179503:217182735);MSTRG.7807.3(217179515:217182735);Zm00001d032209_T002(217181039:217182735);Zm00001d032209_T001(217181039:217182292)
1	217697197	217697197	-	217697197	intergenic	MSTRG.7823	217692377-217704350	MSTRG.7823.1(217692377:217704272);MSTRG.7823.2(217692407:217699203);MSTRG.7823.3(217692407:217699203);MSTRG.7823.4(217693764:217699203);MSTRG.7823.5(217693764:217699203);MSTRG.7823.6(217693764:217704264);MSTRG.7823.7(217693764:217699203);MSTRG.7823.8(217694779:217704350);Zm00001d032221_T001(217698465:217704350);MSTRG.7823.10(217702753:217704293)
1	217697279	217697279	-	217697279	intergenic	MSTRG.7823	217692377-217704350	MSTRG.7823.1(217692377:217704272);MSTRG.7823.2(217692407:217699203);MSTRG.7823.3(217692407:217699203);MSTRG.7823.4(217693764:217699203);MSTRG.7823.5(217693764:217699203);MSTRG.7823.6(217693764:217704264);MSTRG.7823.7(217693764:217699203);MSTRG.7823.8(217694779:217704350);Zm00001d032221_T001(217698465:217704350);MSTRG.7823.10(217702753:217704293)
1	217697388	217697388	-	217697388	intergenic	MSTRG.7823	217692377-217704350	MSTRG.7823.1(217692377:217704272);MSTRG.7823.2(217692407:217699203);MSTRG.7823.3(217692407:217699203);MSTRG.7823.4(217693764:217699203);MSTRG.7823.5(217693764:217699203);MSTRG.7823.6(217693764:217704264);MSTRG.7823.7(217693764:217699203);MSTRG.7823.8(217694779:217704350);Zm00001d032221_T001(217698465:217704350);MSTRG.7823.10(217702753:217704293)
1	217697435	217697462	-	217697440	intergenic	MSTRG.7823	217692377-217704350	MSTRG.7823.1(217692377:217704272);MSTRG.7823.2(217692407:217699203);MSTRG.7823.3(217692407:217699203);MSTRG.7823.4(217693764:217699203);MSTRG.7823.5(217693764:217699203);MSTRG.7823.6(217693764:217704264);MSTRG.7823.7(217693764:217699203);MSTRG.7823.8(217694779:217704350);Zm00001d032221_T001(217698465:217704350);MSTRG.7823.10(217702753:217704293)
1	219618647	219618787	-	219618692	intergenic	MSTRG.7880	219618642-219630416	MSTRG.7880.1(219618642:219630416);Zm00001d032263_T001(219629525:219630243);Zm00001d032263_T002(219629528:219630314)
1	219628034	219628034	-	219628034	intergenic	MSTRG.7880	219618642-219630416	MSTRG.7880.1(219618642:219630416);Zm00001d032263_T001(219629525:219630243);Zm00001d032263_T002(219629528:219630314)
1	220251326	220251326	-	220251326	intergenic	MSTRG.7906	220236653-220251427	MSTRG.7906.1(220236653:220251427)
1	220857861	220857861	-	220857861	intergenic	MSTRG.7927	220857797-220859459	MSTRG.7927.1(220857797:220859459)
1	224454964	224454964	-	224454964	intergenic	MSTRG.8046	224454799-224456612	MSTRG.8046.1(224454799:224456612)
1	224650309	224650309	-	224650309	intergenic	MSTRG.8055	224650292-224669204	MSTRG.8055.1(224650292:224650972);MSTRG.8055.2(224650318:224669204)
1	224650415	224650419	-	224650419	intergenic	MSTRG.8055	224650292-224669204	MSTRG.8055.1(224650292:224650972);MSTRG.8055.2(224650318:224669204)
1	227219851	227219851	-	227219851	intergenic	MSTRG.8167	227219560-227219986	MSTRG.8167.1(227219560:227219986)
1	227431373	227431397	-	227431373	intergenic	MSTRG.8182;MSTRG.8184	227428280-227453081;227430155-227434179	MSTRG.8182.1(227428280:227430153);MSTRG.8182.2(227428295:227452936);MSTRG.8182.3(227428387:227430153);MSTRG.8182.4(227428387:227430153);Zm00001d032459_T001(227428558:227430153);MSTRG.8182.6(227449081:227453081);MSTRG.8182.7(227451036:227452902);MSTRG.8184.1(227430155:227434179);MSTRG.8184.2(227430164:227433412);MSTRG.8184.3(227431306:227433412);Zm00001d032460_T001(227432054:227433412)
1	227431463	227431467	-	227431464	intergenic	MSTRG.8182;MSTRG.8184	227428280-227453081;227430155-227434179	MSTRG.8182.1(227428280:227430153);MSTRG.8182.2(227428295:227452936);MSTRG.8182.3(227428387:227430153);MSTRG.8182.4(227428387:227430153);Zm00001d032459_T001(227428558:227430153);MSTRG.8182.6(227449081:227453081);MSTRG.8182.7(227451036:227452902);MSTRG.8184.1(227430155:227434179);MSTRG.8184.2(227430164:227433412);MSTRG.8184.3(227431306:227433412);Zm00001d032460_T001(227432054:227433412)
1	228685439	228685440	-	228685439	intergenic	MSTRG.8237	228683333-228759817	MSTRG.8237.1(228683333:228759817);Zm00001d032504_T001(228756797:228759565);MSTRG.8237.3(228756808:228759817)
1	228688416	228688416	-	228688416	intergenic	MSTRG.8237	228683333-228759817	MSTRG.8237.1(228683333:228759817);Zm00001d032504_T001(228756797:228759565);MSTRG.8237.3(228756808:228759817)
1	228756594	228756613	-	228756594	intergenic	MSTRG.8237	228683333-228759817	MSTRG.8237.1(228683333:228759817);Zm00001d032504_T001(228756797:228759565);MSTRG.8237.3(228756808:228759817)
1	230862680	230862718	-	230862680	intergenic	MSTRG.8354	230862678-230864361	MSTRG.8354.1(230862678:230864361);Zm00001d032571_T001(230863189:230864361)
1	230978554	230978587	-	230978573	intergenic	MSTRG.8359	230978548-230982191	MSTRG.8359.1(230978548:230982191);MSTRG.8359.2(230978553:230982135);Zm00001d032573_T001(230979145:230982119)
1	233043748	233043769	-	233043769	intergenic	MSTRG.8448	233043752-233068734	MSTRG.8448.1(233043752:233068734);Zm00001d032646_T001(233067573:233068723)
1	233043796	233043833	-	233043816	intergenic	MSTRG.8448	233043752-233068734	MSTRG.8448.1(233043752:233068734);Zm00001d032646_T001(233067573:233068723)
1	233043879	233043879	-	233043879	intergenic	MSTRG.8448	233043752-233068734	MSTRG.8448.1(233043752:233068734);Zm00001d032646_T001(233067573:233068723)
1	233134759	233134759	-	233134759	intergenic	MSTRG.8459	233133389-233135135	MSTRG.8459.1(233133389:233135135)
1	233237983	233238170	-	233238013	intergenic	MSTRG.8463	233237980-233282063	MSTRG.8463.1(233237980:233282062);MSTRG.8463.2(233237980:233282063);Zm00001d032655_T002(233262795:233278419);Zm00001d032655_T003(233262795:233281894);Zm00001d032655_T005(233262795:233282063);Zm00001d032655_T008(233262795:233282063);Zm00001d032655_T007(233262795:233282063);Zm00001d032655_T004(233262795:233282062);Zm00001d032655_T006(233262795:233282063);Zm00001d032655_T009(233264708:233280277);Zm0…
1	233453023	233453023	-	233453023	intergenic	MSTRG.8473	233451305-233510867	MSTRG.8473.1(233451305:233452288);MSTRG.8473.2(233451463:233464570);MSTRG.8473.3(233451491:233510867);Zm00001d032663_T001(233451746:233452288)
1	234746506	234746515	-	234746506	intergenic	MSTRG.8520	234746427-234746967	MSTRG.8520.1(234746427:234746967)
1	234746550	234746561	-	234746550	intergenic	MSTRG.8520	234746427-234746967	MSTRG.8520.1(234746427:234746967)
1	234902347	234902347	-	234902347	intergenic	MSTRG.8525	234882186-234949558	MSTRG.8525.1(234882186:234949558);MSTRG.8525.2(234882192:234908027);Zm00001d032695_T001(234902658:234908089)
1	235998299	235998299	-	235998299	intergenic	MSTRG.8566	235997323-236002159	MSTRG.8566.1(235997323:236002159)
1	236001971	236001971	-	236001971	intergenic	MSTRG.8566	235997323-236002159	MSTRG.8566.1(235997323:236002159)
1	237443983	237443983	-	237443983	intergenic	MSTRG.8616	237443831-237451532	MSTRG.8616.1(237443831:237451532);MSTRG.8616.2(237443877:237451488);MSTRG.8616.3(237443891:237451341);MSTRG.8616.4(237443932:237451532);Zm00001d032754_T002(237444154:237451532);Zm00001d032754_T001(237444154:237450889);Zm00001d032754_T003(237444180:237451367);MSTRG.8616.8(237444194:237451448);MSTRG.8616.9(237444194:237451486);MSTRG.8616.10(237444226:237451367)
1	237904759	237904759	-	237904759	intergenic	MSTRG.8647	237902317-237922715	MSTRG.8647.1(237902317:237922715)
1	237933138	237933138	-	237933138	intergenic	MSTRG.8651	237933096-237946297	MSTRG.8651.1(237933096:237946297)
1	237933195	237933198	-	237933195	intergenic	MSTRG.8651	237933096-237946297	MSTRG.8651.1(237933096:237946297)
1	238130872	238130872	-	238130872	intergenic	MSTRG.8657	238130505-238132998	MSTRG.8657.1(238130505:238132998);Zm00001d032786_T001(238131763:238132998)
1	239020229	239020229	-	239020229	intergenic	MSTRG.8691	239017575-239027002	MSTRG.8691.1(239017575:239027002)
1	239167258	239167258	-	239167258	intergenic	MSTRG.8701	239167233-239167668	MSTRG.8701.1(239167233:239167668)
1	239178544	239178697	-	239178544	intergenic	MSTRG.8704	239178013-239184731	MSTRG.8704.1(239178013:239184731)
1	239179970	239179970	-	239179970	intergenic	MSTRG.8704	239178013-239184731	MSTRG.8704.1(239178013:239184731)
1	239186757	239186790	-	239186757	intergenic	MSTRG.8705	239186736-239210024	MSTRG.8705.1(239186736:239210024)
1	239186815	239186815	-	239186815	intergenic	MSTRG.8705	239186736-239210024	MSTRG.8705.1(239186736:239210024)
1	239186844	239186946	-	239186873	intergenic	MSTRG.8705	239186736-239210024	MSTRG.8705.1(239186736:239210024)
1	239187016	239187016	-	239187016	intergenic	MSTRG.8705	239186736-239210024	MSTRG.8705.1(239186736:239210024)
1	239188446	239188452	-	239188452	intergenic	MSTRG.8705	239186736-239210024	MSTRG.8705.1(239186736:239210024)
1	243023385	243023385	-	243023385	intergenic	MSTRG.8840	243021464-243026669	MSTRG.8840.1(243021464:243026669);Zm00001d032918_T001(243021464:243022587);MSTRG.8840.3(243023223:243026449);MSTRG.8840.4(243023317:243026573);MSTRG.8840.5(243023317:243026573);MSTRG.8840.6(243023317:243026573)
1	243735036	243735043	-	243735041	intergenic	MSTRG.8864	243735004-243745151	MSTRG.8864.1(243735004:243745104);Zm00001d032933_T002(243735038:243741604);MSTRG.8864.3(243735039:243745090);Zm00001d032933_T004(243735039:243741845);Zm00001d032933_T006(243735043:243741664);MSTRG.8864.6(243735044:243745151);Zm00001d032933_T009(243735044:243741309);MSTRG.8864.8(243735045:243741604);Zm00001d032933_T011(243735045:243741605);MSTRG.8864.10(243735208:243745096);MSTRG.8864.11(243735208…
1	247429192	247429192	-	247429192	intergenic	MSTRG.8996	247427127-247431481	MSTRG.8996.1(247427127:247431481)
1	247429397	247429397	-	247429397	intergenic	MSTRG.8996;MSTRG.8997	247427127-247431481;247429244-247430016	MSTRG.8996.1(247427127:247431481);MSTRG.8997.1(247429244:247430016)
1	247429439	247429471	-	247429461	intergenic	MSTRG.8996;MSTRG.8997	247427127-247431481;247429244-247430016	MSTRG.8996.1(247427127:247431481);MSTRG.8997.1(247429244:247430016)
1	248459892	248459917	-	248459892	intergenic	MSTRG.9030	248431186-248524136	MSTRG.9030.1(248431186:248524136);Zm00001d033044_T001(248431212:248432937);MSTRG.9030.3(248431215:248432808)
1	248460399	248460409	-	248460409	intergenic	MSTRG.9030;MSTRG.9033	248431186-248524136;248460197-248462617	MSTRG.9030.1(248431186:248524136);Zm00001d033044_T001(248431212:248432937);MSTRG.9030.3(248431215:248432808);MSTRG.9033.1(248460197:248462564);MSTRG.9033.2(248460971:248462617);MSTRG.9033.3(248460971:248462617);Zm00001d033047_T001(248461165:248462268)
1	250177480	250177480	-	250177480	intergenic	MSTRG.9101	250177290-250177943	MSTRG.9101.1(250177290:250177943)
1	250177557	250177557	-	250177557	intergenic	MSTRG.9101	250177290-250177943	MSTRG.9101.1(250177290:250177943)
1	252139900	252139941	-	252139900	intergenic	MSTRG.9170	252139759-252141859	MSTRG.9170.1(252139759:252141859)
1	252139998	252140133	-	252140122	intergenic	MSTRG.9170	252139759-252141859	MSTRG.9170.1(252139759:252141859)
1	252630465	252630502	-	252630502	intergenic	MSTRG.9190	252630474-252632940	MSTRG.9190.1(252630474:252632940)
1	252630545	252630545	-	252630545	intergenic	MSTRG.9190	252630474-252632940	MSTRG.9190.1(252630474:252632940)
1	252630570	252630570	-	252630570	intergenic	MSTRG.9190	252630474-252632940	MSTRG.9190.1(252630474:252632940)
1	253162386	253162401	-	253162386	intergenic	MSTRG.9209	253162218-253166936	MSTRG.9209.1(253162218:253166517);MSTRG.9209.2(253164848:253166936);MSTRG.9209.3(253164989:253166547)
1	253168283	253168283	-	253168283	intergenic	MSTRG.9211	253167361-253170128	MSTRG.9211.1(253167361:253170128);MSTRG.9211.2(253167991:253170114);MSTRG.9211.3(253167992:253170128);MSTRG.9211.4(253167992:253170128)
1	253169333	253169345	-	253169333	intergenic	MSTRG.9211	253167361-253170128	MSTRG.9211.1(253167361:253170128);MSTRG.9211.2(253167991:253170114);MSTRG.9211.3(253167992:253170128);MSTRG.9211.4(253167992:253170128)
1	253169425	253169425	-	253169425	intergenic	MSTRG.9211	253167361-253170128	MSTRG.9211.1(253167361:253170128);MSTRG.9211.2(253167991:253170114);MSTRG.9211.3(253167992:253170128);MSTRG.9211.4(253167992:253170128)
1	254193311	254193311	-	254193311	intergenic	MSTRG.9242	254172725-254197449	MSTRG.9242.1(254172725:254197444);MSTRG.9242.2(254194021:254197449);Zm00001d033210_T002(254194092:254197449);Zm00001d033210_T001(254194092:254197444);Zm00001d033210_T003(254194120:254197399);Zm00001d033210_T004(254194142:254197414);MSTRG.9242.7(254194244:254197311);Zm00001d033210_T005(254194244:254195679)
1	254193766	254193766	-	254193766	intergenic	MSTRG.9242	254172725-254197449	MSTRG.9242.1(254172725:254197444);MSTRG.9242.2(254194021:254197449);Zm00001d033210_T002(254194092:254197449);Zm00001d033210_T001(254194092:254197444);Zm00001d033210_T003(254194120:254197399);Zm00001d033210_T004(254194142:254197414);MSTRG.9242.7(254194244:254197311);Zm00001d033210_T005(254194244:254195679)
1	254193792	254193792	-	254193792	intergenic	MSTRG.9242	254172725-254197449	MSTRG.9242.1(254172725:254197444);MSTRG.9242.2(254194021:254197449);Zm00001d033210_T002(254194092:254197449);Zm00001d033210_T001(254194092:254197444);Zm00001d033210_T003(254194120:254197399);Zm00001d033210_T004(254194142:254197414);MSTRG.9242.7(254194244:254197311);Zm00001d033210_T005(254194244:254195679)
1	256036711	256036713	-	256036713	intergenic	MSTRG.9314	255988478-256109189	MSTRG.9314.1(255988478:256109189);MSTRG.9314.2(255988574:256003060);MSTRG.9314.3(255988725:256108059);MSTRG.9314.4(255996089:256002075)
1	257135561	257135561	-	257135561	intergenic	MSTRG.9345	257135552-257136096	MSTRG.9345.1(257135552:257136096)
1	257405635	257405635	-	257405635	intergenic	MSTRG.9352	257335082-257406772	MSTRG.9352.1(257335082:257406364);MSTRG.9352.2(257335164:257337638);Zm00001d033280_T001(257335467:257337638);MSTRG.9352.4(257405026:257406620);MSTRG.9352.5(257405045:257406772)
1	257762072	257762072	-	257762072	intergenic	MSTRG.9368	257754892-257773693	MSTRG.9368.1(257754892:257773693)
1	258065682	258065682	-	258065682	intergenic	MSTRG.9386	258061637-258070134	MSTRG.9386.1(258061637:258070134);Zm00001d033301_T001(258066503:258070037)
1	258695821	258695836	-	258695835	intergenic	MSTRG.9410	258695804-258706485	MSTRG.9410.1(258695804:258698152);Zm00001d033314_T001(258696000:258705544);MSTRG.9410.3(258703020:258706485)
1	259426705	259426710	-	259426705	intergenic	MSTRG.9447	259426419-259430284	MSTRG.9447.1(259426419:259430284);Zm00001d033335_T001(259429013:259429858)
1	259426790	259426798	-	259426798	intergenic	MSTRG.9447	259426419-259430284	MSTRG.9447.1(259426419:259430284);Zm00001d033335_T001(259429013:259429858)
1	259426936	259426936	-	259426936	intergenic	MSTRG.9447	259426419-259430284	MSTRG.9447.1(259426419:259430284);Zm00001d033335_T001(259429013:259429858)
1	261045835	261045835	-	261045835	intergenic	MSTRG.9517	261037004-261053132	MSTRG.9517.1(261037004:261052803);MSTRG.9517.2(261046999:261053132)
1	261929884	261929929	-	261929906	intergenic	MSTRG.9559	261929168-261931760	MSTRG.9559.1(261929168:261931760);Zm00001d033402_T001(261930159:261931570);Zm00001d033402_T002(261930159:261931759)
1	262338355	262338355	-	262338355	intergenic	MSTRG.9567	262338221-262343862	MSTRG.9567.1(262338221:262343862);Zm00001d033412_T001(262342434:262343681)
1	262338452	262338471	-	262338471	intergenic	MSTRG.9567	262338221-262343862	MSTRG.9567.1(262338221:262343862);Zm00001d033412_T001(262342434:262343681)
1	262339948	262339948	-	262339948	intergenic	MSTRG.9567	262338221-262343862	MSTRG.9567.1(262338221:262343862);Zm00001d033412_T001(262342434:262343681)
1	263586847	263586871	-	263586870	intergenic	MSTRG.9623	263586773-263587211	MSTRG.9623.1(263586773:263587211)
1	263586928	263586928	-	263586928	intergenic	MSTRG.9623	263586773-263587211	MSTRG.9623.1(263586773:263587211)
1	263686954	263686954	-	263686954	intergenic	MSTRG.9630	263686901-263689455	MSTRG.9630.1(263686901:263689455);Zm00001d033475_T001(263687686:263689455)
1	263687053	263687053	-	263687053	intergenic	MSTRG.9630	263686901-263689455	MSTRG.9630.1(263686901:263689455);Zm00001d033475_T001(263687686:263689455)
1	263846932	263846932	-	263846932	intergenic	MSTRG.9632	263817742-263855159	MSTRG.9632.1(263817742:263855159)
1	264059840	264059840	-	264059840	intergenic	MSTRG.9655	264059550-264060336	MSTRG.9655.1(264059550:264060336)
1	264701400	264701416	-	264701416	intergenic	MSTRG.9685	264701371-264705087	MSTRG.9685.1(264701371:264705087);Zm00001d033505_T001(264701953:264705087)
1	264701445	264701451	-	264701451	intergenic	MSTRG.9685	264701371-264705087	MSTRG.9685.1(264701371:264705087);Zm00001d033505_T001(264701953:264705087)
1	265482592	265482592	-	265482592	intergenic	MSTRG.9704	265482538-265484157	MSTRG.9704.1(265482538:265484157);MSTRG.9704.2(265482541:265484157);MSTRG.9704.3(265482553:265484140);MSTRG.9704.4(265482553:265484140);MSTRG.9704.5(265482563:265484136);MSTRG.9704.6(265482564:265484136)
1	265931206	265931206	-	265931206	intergenic	MSTRG.9719	265931109-266038588	MSTRG.9719.1(265931109:265972528);MSTRG.9719.2(265931191:265972528);MSTRG.9719.3(265931313:265972528);MSTRG.9719.4(265931327:265972528);MSTRG.9719.5(265931330:266038588);MSTRG.9719.6(265931330:265972528);MSTRG.9719.7(265931333:265972528);MSTRG.9719.8(265931337:265972528);MSTRG.9719.9(265931337:265972528);MSTRG.9719.10(265931339:266038587);MSTRG.9719.11(265931339:265972528);MSTRG.9719.12(265931342…
1	265958237	265958272	-	265958266	intergenic	MSTRG.9719	265931109-266038588	MSTRG.9719.1(265931109:265972528);MSTRG.9719.2(265931191:265972528);MSTRG.9719.3(265931313:265972528);MSTRG.9719.4(265931327:265972528);MSTRG.9719.5(265931330:266038588);MSTRG.9719.6(265931330:265972528);MSTRG.9719.7(265931333:265972528);MSTRG.9719.8(265931337:265972528);MSTRG.9719.9(265931337:265972528);MSTRG.9719.10(265931339:266038587);MSTRG.9719.11(265931339:265972528);MSTRG.9719.12(265931342…
1	266975025	266975025	-	266975025	intergenic	MSTRG.9746	266968160-266977008	MSTRG.9746.1(266968160:266977008)
1	266975194	266975194	-	266975194	intergenic	MSTRG.9746	266968160-266977008	MSTRG.9746.1(266968160:266977008)
1	267430981	267430981	-	267430981	intergenic	MSTRG.9786	267430944-267435724	MSTRG.9786.1(267430944:267435653);Zm00001d033574_T001(267434894:267435724)
1	267431088	267431196	-	267431147	intergenic	MSTRG.9786	267430944-267435724	MSTRG.9786.1(267430944:267435653);Zm00001d033574_T001(267434894:267435724)
1	267431231	267431245	-	267431231	intergenic	MSTRG.9786	267430944-267435724	MSTRG.9786.1(267430944:267435653);Zm00001d033574_T001(267434894:267435724)
1	267431706	267431706	-	267431706	intergenic	MSTRG.9786	267430944-267435724	MSTRG.9786.1(267430944:267435653);Zm00001d033574_T001(267434894:267435724)
1	267432973	267432973	-	267432973	intergenic	MSTRG.9786	267430944-267435724	MSTRG.9786.1(267430944:267435653);Zm00001d033574_T001(267434894:267435724)
1	267433157	267433158	-	267433158	intergenic	MSTRG.9786	267430944-267435724	MSTRG.9786.1(267430944:267435653);Zm00001d033574_T001(267434894:267435724)
1	267907603	267907603	-	267907603	intergenic	MSTRG.9801	267907540-267910856	MSTRG.9801.1(267907540:267910815);MSTRG.9801.2(267907675:267910851);MSTRG.9801.3(267907767:267910838);MSTRG.9801.4(267907853:267910856);MSTRG.9801.5(267908437:267910776);MSTRG.9801.6(267908574:267910771);MSTRG.9801.7(267908582:267910815);Zm00001d033586_T001(267909702:267910856)
1	267908080	267908080	-	267908080	intergenic	MSTRG.9801	267907540-267910856	MSTRG.9801.1(267907540:267910815);MSTRG.9801.2(267907675:267910851);MSTRG.9801.3(267907767:267910838);MSTRG.9801.4(267907853:267910856);MSTRG.9801.5(267908437:267910776);MSTRG.9801.6(267908574:267910771);MSTRG.9801.7(267908582:267910815);Zm00001d033586_T001(267909702:267910856)
1	267974398	267974400	-	267974400	intergenic	MSTRG.9803	267974366-268036942	MSTRG.9803.1(267974366:268036942);Zm00001d033589_T001(267976400:267977244);Zm00001d033589_T002(267976458:267977221)
1	267974430	267974505	-	267974478	intergenic	MSTRG.9803	267974366-268036942	MSTRG.9803.1(267974366:268036942);Zm00001d033589_T001(267976400:267977244);Zm00001d033589_T002(267976458:267977221)
1	267974542	267974542	-	267974542	intergenic	MSTRG.9803	267974366-268036942	MSTRG.9803.1(267974366:268036942);Zm00001d033589_T001(267976400:267977244);Zm00001d033589_T002(267976458:267977221)
1	269012230	269012230	-	269012230	intergenic	MSTRG.9853	269011693-269014829	MSTRG.9853.1(269011693:269014829);Zm00001d033620_T001(269012384:269014829);Zm00001d033620_T002(269012499:269014829)
1	269559841	269559841	-	269559841	intergenic	MSTRG.9890	269551595-269564115	Zm00001d033646_T003(269551595:269556064);Zm00001d033646_T005(269551595:269556064);Zm00001d033646_T004(269551595:269556064);Zm00001d033646_T002(269551595:269556064);Zm00001d033646_T001(269551595:269556064);Zm00001d033646_T006(269551609:269556064);Zm00001d033646_T007(269551610:269556034);Zm00001d033646_T008(269551619:269555319);MSTRG.9890.9(269551627:269556034);Zm00001d033646_T012(269551627:2695560…
1	269765902	269765904	-	269765902	intergenic	MSTRG.9901	269738130-269799268	MSTRG.9901.1(269738130:269799222);Zm00001d033655_T001(269775416:269799251);Zm00001d033655_T002(269775420:269798910);Zm00001d033655_T003(269775420:269799031);Zm00001d033655_T004(269775427:269799258);Zm00001d033655_T005(269775436:269799251);Zm00001d033655_T006(269775443:269799205);Zm00001d033655_T007(269775451:269798483);Zm00001d033655_T008(269775451:269799180);Zm00001d033655_T011(269775451:2697992…
1	270558210	270558210	-	270558210	intergenic	MSTRG.9936	270557831-270564722	MSTRG.9936.1(270557831:270564722);MSTRG.9936.2(270557831:270564668);MSTRG.9936.3(270557831:270564668);MSTRG.9936.4(270557907:270564693);MSTRG.9936.5(270557926:270564629);MSTRG.9936.6(270557953:270564722);MSTRG.9936.7(270557973:270564693);MSTRG.9936.8(270557973:270564693);MSTRG.9936.9(270557992:270564629)
1	271605311	271605311	-	271605311	intergenic	MSTRG.9972	271605286-271606285	MSTRG.9972.1(271605286:271606285)
1	272299905	272299905	-	272299905	intergenic	MSTRG.10002	272299812-272303141	MSTRG.10002.1(272299812:272303141);MSTRG.10002.2(272299812:272303077);MSTRG.10002.3(272299812:272303077);MSTRG.10002.4(272300322:272303093)
1	272299939	272299947	-	272299947	intergenic	MSTRG.10002	272299812-272303141	MSTRG.10002.1(272299812:272303141);MSTRG.10002.2(272299812:272303077);MSTRG.10002.3(272299812:272303077);MSTRG.10002.4(272300322:272303093)
1	272300002	272300002	-	272300002	intergenic	MSTRG.10002	272299812-272303141	MSTRG.10002.1(272299812:272303141);MSTRG.10002.2(272299812:272303077);MSTRG.10002.3(272299812:272303077);MSTRG.10002.4(272300322:272303093)
1	272300063	272300068	-	272300063	intergenic	MSTRG.10002	272299812-272303141	MSTRG.10002.1(272299812:272303141);MSTRG.10002.2(272299812:272303077);MSTRG.10002.3(272299812:272303077);MSTRG.10002.4(272300322:272303093)
1	272368742	272368742	-	272368742	intergenic	MSTRG.10010	272347214-272372249	Zm00001d033727_T001(272347214:272357637);MSTRG.10010.2(272347225:272372227);Zm00001d033727_T002(272347225:272357637);MSTRG.10010.4(272368724:272372190);MSTRG.10010.5(272368739:272372249);Zm00001d033731_T001(272370663:272372249)
1	272368797	272368818	-	272368809	intergenic	MSTRG.10010	272347214-272372249	Zm00001d033727_T001(272347214:272357637);MSTRG.10010.2(272347225:272372227);Zm00001d033727_T002(272347225:272357637);MSTRG.10010.4(272368724:272372190);MSTRG.10010.5(272368739:272372249);Zm00001d033731_T001(272370663:272372249)
1	272368906	272368973	-	272368973	intergenic	MSTRG.10010	272347214-272372249	Zm00001d033727_T001(272347214:272357637);MSTRG.10010.2(272347225:272372227);Zm00001d033727_T002(272347225:272357637);MSTRG.10010.4(272368724:272372190);MSTRG.10010.5(272368739:272372249);Zm00001d033731_T001(272370663:272372249)
1	272369411	272369411	-	272369411	intergenic	MSTRG.10010	272347214-272372249	Zm00001d033727_T001(272347214:272357637);MSTRG.10010.2(272347225:272372227);Zm00001d033727_T002(272347225:272357637);MSTRG.10010.4(272368724:272372190);MSTRG.10010.5(272368739:272372249);Zm00001d033731_T001(272370663:272372249)
1	272697870	272697870	-	272697870	intergenic	MSTRG.10030	272697831-272704445	MSTRG.10030.1(272697831:272704445);MSTRG.10030.2(272702490:272704313)
1	273390303	273390307	-	273390307	intergenic	MSTRG.10060	273389960-273391591	MSTRG.10060.1(273389960:273391591)
1	273544303	273544305	-	273544303	intergenic	MSTRG.10067	273544027-273544664	MSTRG.10067.1(273544027:273544664)
1	273827183	273827183	-	273827183	intergenic	MSTRG.10088	273825973-273832913	MSTRG.10088.1(273825973:273832871);Zm00001d033792_T001(273827662:273832913)
1	273827319	273827319	-	273827319	intergenic	MSTRG.10088	273825973-273832913	MSTRG.10088.1(273825973:273832871);Zm00001d033792_T001(273827662:273832913)
1	273827435	273827592	-	273827464	intergenic	MSTRG.10088	273825973-273832913	MSTRG.10088.1(273825973:273832871);Zm00001d033792_T001(273827662:273832913)
1	274187146	274187146	-	274187146	intergenic	MSTRG.10107	274185216-274187655	MSTRG.10107.1(274185216:274187655)
1	274236223	274236223	-	274236223	intergenic	MSTRG.10110	274230283-274269809	MSTRG.10110.1(274230283:274242745);MSTRG.10110.2(274230321:274269809)
1	274236270	274236333	-	274236291	intergenic	MSTRG.10110	274230283-274269809	MSTRG.10110.1(274230283:274242745);MSTRG.10110.2(274230321:274269809)
1	274241748	274241748	-	274241748	intergenic	MSTRG.10110	274230283-274269809	MSTRG.10110.1(274230283:274242745);MSTRG.10110.2(274230321:274269809)
1	275495226	275495226	-	275495226	intergenic	MSTRG.10164	275495091-275496485	MSTRG.10164.1(275495091:275496485)
1	275495656	275495656	-	275495656	intergenic	MSTRG.10164	275495091-275496485	MSTRG.10164.1(275495091:275496485)
1	275495854	275495854	-	275495854	intergenic	MSTRG.10164	275495091-275496485	MSTRG.10164.1(275495091:275496485)
1	275495903	275495903	-	275495903	intergenic	MSTRG.10164	275495091-275496485	MSTRG.10164.1(275495091:275496485)
1	275751263	275751263	-	275751263	intergenic	MSTRG.10182	275751253-275757102	MSTRG.10182.1(275751253:275757102);Zm00001d033849_T001(275752027:275757012);Zm00001d033849_T002(275752106:275757102)
1	275751340	275751343	-	275751343	intergenic	MSTRG.10182	275751253-275757102	MSTRG.10182.1(275751253:275757102);Zm00001d033849_T001(275752027:275757012);Zm00001d033849_T002(275752106:275757102)
1	275751893	275751908	-	275751908	intergenic	MSTRG.10182	275751253-275757102	MSTRG.10182.1(275751253:275757102);Zm00001d033849_T001(275752027:275757012);Zm00001d033849_T002(275752106:275757102)
1	276050628	276050628	-	276050628	intergenic	MSTRG.10194	276045738-276069338	MSTRG.10194.1(276045738:276069338);MSTRG.10194.2(276045738:276047482);Zm00001d033857_T001(276045738:276047507);MSTRG.10194.4(276046280:276047482)
1	277356137	277356180	-	277356157	intergenic	MSTRG.10240	277356082-277359445	MSTRG.10240.1(277356082:277359445);Zm00001d033884_T001(277357877:277359445)
1	277356208	277356232	-	277356208	intergenic	MSTRG.10240	277356082-277359445	MSTRG.10240.1(277356082:277359445);Zm00001d033884_T001(277357877:277359445)
1	278708136	278708136	-	278708136	intergenic	MSTRG.10296	278704407-278709343	Zm00001d033925_T001(278704407:278706905);MSTRG.10296.2(278704571:278709343);MSTRG.10296.3(278704571:278709343)
1	279338122	279338136	-	279338122	intergenic	MSTRG.10329	279337957-279339592	MSTRG.10329.1(279337957:279339592);MSTRG.10329.2(279338120:279338881);MSTRG.10329.3(279338157:279339074)
1	279338205	279338280	-	279338253	intergenic	MSTRG.10329	279337957-279339592	MSTRG.10329.1(279337957:279339592);MSTRG.10329.2(279338120:279338881);MSTRG.10329.3(279338157:279339074)
1	279338656	279338669	-	279338664	intergenic	MSTRG.10329	279337957-279339592	MSTRG.10329.1(279337957:279339592);MSTRG.10329.2(279338120:279338881);MSTRG.10329.3(279338157:279339074)
1	279338722	279338722	-	279338722	intergenic	MSTRG.10329	279337957-279339592	MSTRG.10329.1(279337957:279339592);MSTRG.10329.2(279338120:279338881);MSTRG.10329.3(279338157:279339074)
1	279840184	279840203	-	279840184	intergenic	MSTRG.10352	279840182-279845629	MSTRG.10352.1(279840182:279845598);Zm00001d033967_T001(279841861:279845629)
1	279840236	279840236	-	279840236	intergenic	MSTRG.10352	279840182-279845629	MSTRG.10352.1(279840182:279845598);Zm00001d033967_T001(279841861:279845629)
1	279935496	279935496	-	279935496	intergenic	MSTRG.10359;MSTRG.10361	279916717-279978300;279923046-279967024	MSTRG.10359.1(279916717:279978300);MSTRG.10361.1(279923046:279967024);MSTRG.10361.2(279923057:279942706);Zm00001d033976_T001(279923057:279925584);Zm00001d033976_T002(279923057:279925695);Zm00001d033976_T003(279923098:279925583);Zm00001d033976_T004(279923104:279925806)
1	280143142	280143142	-	280143142	intergenic	MSTRG.10377;MSTRG.10378	280118432-280171262;280142784-280163952	MSTRG.10377.1(280118432:280171262);MSTRG.10377.2(280118432:280166343);Zm00001d033983_T002(280118432:280122114);Zm00001d033983_T001(280118432:280122114);Zm00001d033983_T003(280119149:280122114);MSTRG.10378.1(280142784:280163749);MSTRG.10378.2(280143687:280163952);Zm00001d033984_T001(280143756:280153306);Zm00001d033984_T003(280143756:280163749);Zm00001d033984_T002(280143756:280163749);MSTRG.10378.6…
1	280284618	280284618	-	280284618	intergenic	MSTRG.10383	280282986-280285290	MSTRG.10383.1(280282986:280285276);MSTRG.10383.2(280282986:280285276);MSTRG.10383.3(280283591:280285290)
1	280554085	280554085	-	280554085	intergenic	MSTRG.10395	280552091-280556272	MSTRG.10395.1(280552091:280556272)
1	281247096	281247096	-	281247096	intergenic	MSTRG.10452	281246130-281250007	MSTRG.10452.1(281246130:281250007);MSTRG.10452.2(281246130:281249952);MSTRG.10452.3(281246633:281249971)
1	281247122	281247122	-	281247122	intergenic	MSTRG.10452	281246130-281250007	MSTRG.10452.1(281246130:281250007);MSTRG.10452.2(281246130:281249952);MSTRG.10452.3(281246633:281249971)
1	282496902	282496902	-	282496902	intergenic	MSTRG.10518	282496776-282498104	MSTRG.10518.1(282496776:282498104)
1	283080201	283080201	-	283080201	intergenic	MSTRG.10551	283080116-283087151	MSTRG.10551.1(283080116:283087151);MSTRG.10551.2(283080140:283087083);MSTRG.10551.3(283080140:283087083);MSTRG.10551.4(283080147:283087099);MSTRG.10551.5(283080154:283087119);MSTRG.10551.6(283080181:283087151);MSTRG.10551.7(283080198:283087056);MSTRG.10551.8(283080248:283087062);MSTRG.10551.9(283080277:283087086);MSTRG.10551.10(283080332:283087102);MSTRG.10551.11(283081294:283086968)
1	283080291	283080291	-	283080291	intergenic	MSTRG.10551	283080116-283087151	MSTRG.10551.1(283080116:283087151);MSTRG.10551.2(283080140:283087083);MSTRG.10551.3(283080140:283087083);MSTRG.10551.4(283080147:283087099);MSTRG.10551.5(283080154:283087119);MSTRG.10551.6(283080181:283087151);MSTRG.10551.7(283080198:283087056);MSTRG.10551.8(283080248:283087062);MSTRG.10551.9(283080277:283087086);MSTRG.10551.10(283080332:283087102);MSTRG.10551.11(283081294:283086968)
1	283081336	283081336	-	283081336	intergenic	MSTRG.10551	283080116-283087151	MSTRG.10551.1(283080116:283087151);MSTRG.10551.2(283080140:283087083);MSTRG.10551.3(283080140:283087083);MSTRG.10551.4(283080147:283087099);MSTRG.10551.5(283080154:283087119);MSTRG.10551.6(283080181:283087151);MSTRG.10551.7(283080198:283087056);MSTRG.10551.8(283080248:283087062);MSTRG.10551.9(283080277:283087086);MSTRG.10551.10(283080332:283087102);MSTRG.10551.11(283081294:283086968)
1	283082189	283082189	-	283082189	intergenic	MSTRG.10551	283080116-283087151	MSTRG.10551.1(283080116:283087151);MSTRG.10551.2(283080140:283087083);MSTRG.10551.3(283080140:283087083);MSTRG.10551.4(283080147:283087099);MSTRG.10551.5(283080154:283087119);MSTRG.10551.6(283080181:283087151);MSTRG.10551.7(283080198:283087056);MSTRG.10551.8(283080248:283087062);MSTRG.10551.9(283080277:283087086);MSTRG.10551.10(283080332:283087102);MSTRG.10551.11(283081294:283086968)
1	283086604	283086663	-	283086636	intergenic	MSTRG.10551	283080116-283087151	MSTRG.10551.1(283080116:283087151);MSTRG.10551.2(283080140:283087083);MSTRG.10551.3(283080140:283087083);MSTRG.10551.4(283080147:283087099);MSTRG.10551.5(283080154:283087119);MSTRG.10551.6(283080181:283087151);MSTRG.10551.7(283080198:283087056);MSTRG.10551.8(283080248:283087062);MSTRG.10551.9(283080277:283087086);MSTRG.10551.10(283080332:283087102);MSTRG.10551.11(283081294:283086968)
1	283086725	283086725	-	283086725	intergenic	MSTRG.10551	283080116-283087151	MSTRG.10551.1(283080116:283087151);MSTRG.10551.2(283080140:283087083);MSTRG.10551.3(283080140:283087083);MSTRG.10551.4(283080147:283087099);MSTRG.10551.5(283080154:283087119);MSTRG.10551.6(283080181:283087151);MSTRG.10551.7(283080198:283087056);MSTRG.10551.8(283080248:283087062);MSTRG.10551.9(283080277:283087086);MSTRG.10551.10(283080332:283087102);MSTRG.10551.11(283081294:283086968)
1	283712256	283712256	-	283712256	intergenic	MSTRG.10573	283712236-283716095	MSTRG.10573.1(283712236:283716095);MSTRG.10573.2(283712259:283716085);MSTRG.10573.3(283712281:283716056);MSTRG.10573.4(283712289:283716036);Zm00001d034090_T001(283713064:283714392)
1	283712361	283712371	-	283712361	intergenic	MSTRG.10573	283712236-283716095	MSTRG.10573.1(283712236:283716095);MSTRG.10573.2(283712259:283716085);MSTRG.10573.3(283712281:283716056);MSTRG.10573.4(283712289:283716036);Zm00001d034090_T001(283713064:283714392)
1	283712401	283712434	-	283712417	intergenic	MSTRG.10573	283712236-283716095	MSTRG.10573.1(283712236:283716095);MSTRG.10573.2(283712259:283716085);MSTRG.10573.3(283712281:283716056);MSTRG.10573.4(283712289:283716036);Zm00001d034090_T001(283713064:283714392)
1	284051934	284051934	-	284051934	intergenic	MSTRG.10582	284051893-284068738	MSTRG.10582.1(284051893:284068738);Zm00001d034104_T001(284067665:284068684)
1	284052099	284052137	-	284052118	intergenic	MSTRG.10582	284051893-284068738	MSTRG.10582.1(284051893:284068738);Zm00001d034104_T001(284067665:284068684)
1	284055114	284055114	-	284055114	intergenic	MSTRG.10582	284051893-284068738	MSTRG.10582.1(284051893:284068738);Zm00001d034104_T001(284067665:284068684)
1	284694270	284694270	-	284694270	intergenic	MSTRG.10613;MSTRG.10615	284670279-284699183;284692877-284736388	MSTRG.10613.1(284670279:284699183);MSTRG.10615.1(284692877:284736388)
1	284700841	284700841	-	284700841	intergenic	MSTRG.10615;MSTRG.10616	284692877-284736388;284700817-284704398	MSTRG.10615.1(284692877:284736388);MSTRG.10616.1(284700817:284704398);MSTRG.10616.2(284702544:284704057);MSTRG.10616.3(284702548:284704057);MSTRG.10616.4(284702575:284704057);MSTRG.10616.5(284702634:284704057);Zm00001d034131_T001(284703137:284704057)
1	284702611	284702634	-	284702611	intergenic	MSTRG.10615;MSTRG.10616	284692877-284736388;284700817-284704398	MSTRG.10615.1(284692877:284736388);MSTRG.10616.1(284700817:284704398);MSTRG.10616.2(284702544:284704057);MSTRG.10616.3(284702548:284704057);MSTRG.10616.4(284702575:284704057);MSTRG.10616.5(284702634:284704057);Zm00001d034131_T001(284703137:284704057)
1	285009822	285009822	-	285009822	intergenic	MSTRG.10634	285008215-285009873	MSTRG.10634.1(285008215:285009873)
1	285021856	285021884	-	285021856	intergenic	MSTRG.10635	285017714-285025017	MSTRG.10635.1(285017714:285025017);MSTRG.10635.2(285023669:285024917);MSTRG.10635.3(285023677:285024917);Zm00001d034145_T001(285024081:285024917)
1	288838070	288838079	-	288838070	intergenic	MSTRG.10856	288832659-289012823	MSTRG.10856.1(288832659:289012823);MSTRG.10856.2(288832691:289012253);MSTRG.10856.3(288832720:289011985);MSTRG.10856.4(288832720:289011985);MSTRG.10856.5(288832737:288965552);MSTRG.10856.6(288832737:289011818);MSTRG.10856.7(288832746:289012209);MSTRG.10856.8(288841213:289011985);MSTRG.10856.9(288841213:288865900);MSTRG.10856.10(288841217:289012798);MSTRG.10856.11(288841217:289012430);MSTRG.10856.…
1	288947516	288947516	-	288947516	intergenic	MSTRG.10856	288832659-289012823	MSTRG.10856.1(288832659:289012823);MSTRG.10856.2(288832691:289012253);MSTRG.10856.3(288832720:289011985);MSTRG.10856.4(288832720:289011985);MSTRG.10856.5(288832737:288965552);MSTRG.10856.6(288832737:289011818);MSTRG.10856.7(288832746:289012209);MSTRG.10856.8(288841213:289011985);MSTRG.10856.9(288841213:288865900);MSTRG.10856.10(288841217:289012798);MSTRG.10856.11(288841217:289012430);MSTRG.10856.…
1	289137585	289137585	-	289137585	intergenic	MSTRG.10877	289129916-289171089	Zm00001d034319_T001(289129916:289132811);MSTRG.10877.2(289129917:289171089);MSTRG.10877.3(289130010:289132643);MSTRG.10877.4(289130010:289132600);Zm00001d034319_T002(289130010:289132672)
1	290364440	290364440	-	290364440	intergenic	MSTRG.10924	290333533-290364698	MSTRG.10924.1(290333533:290363850);MSTRG.10924.2(290354368:290364698);MSTRG.10924.3(290354561:290363915)
1	291553499	291553499	-	291553499	intergenic	MSTRG.10980	291553009-291555554	MSTRG.10980.1(291553009:291555554);MSTRG.10980.2(291553345:291555270)
1	291553568	291553568	-	291553568	intergenic	MSTRG.10980	291553009-291555554	MSTRG.10980.1(291553009:291555554);MSTRG.10980.2(291553345:291555270)
1	291553595	291553595	-	291553595	intergenic	MSTRG.10980	291553009-291555554	MSTRG.10980.1(291553009:291555554);MSTRG.10980.2(291553345:291555270)
1	291553645	291553649	-	291553645	intergenic	MSTRG.10980	291553009-291555554	MSTRG.10980.1(291553009:291555554);MSTRG.10980.2(291553345:291555270)
1	291831522	291831543	-	291831543	intergenic	MSTRG.10990	291825340-291835875	MSTRG.10990.1(291825340:291835875);MSTRG.10990.2(291829892:291835831);MSTRG.10990.3(291830103:291835851);MSTRG.10990.4(291831190:291835875);Zm00001d034400_T003(291832067:291835875);Zm00001d034400_T001(291832067:291835833);Zm00001d034400_T002(291832067:291835842);Zm00001d034400_T004(291832077:291835823);MSTRG.10990.9(291832101:291835831);Zm00001d034400_T005(291832101:291835831)
1	291831570	291831572	-	291831572	intergenic	MSTRG.10990	291825340-291835875	MSTRG.10990.1(291825340:291835875);MSTRG.10990.2(291829892:291835831);MSTRG.10990.3(291830103:291835851);MSTRG.10990.4(291831190:291835875);Zm00001d034400_T003(291832067:291835875);Zm00001d034400_T001(291832067:291835833);Zm00001d034400_T002(291832067:291835842);Zm00001d034400_T004(291832077:291835823);MSTRG.10990.9(291832101:291835831);Zm00001d034400_T005(291832101:291835831)
1	291831642	291831664	-	291831642	intergenic	MSTRG.10990	291825340-291835875	MSTRG.10990.1(291825340:291835875);MSTRG.10990.2(291829892:291835831);MSTRG.10990.3(291830103:291835851);MSTRG.10990.4(291831190:291835875);Zm00001d034400_T003(291832067:291835875);Zm00001d034400_T001(291832067:291835833);Zm00001d034400_T002(291832067:291835842);Zm00001d034400_T004(291832077:291835823);MSTRG.10990.9(291832101:291835831);Zm00001d034400_T005(291832101:291835831)
1	292632587	292632614	-	292632587	intergenic	MSTRG.11035	292625000-292667720	Zm00001d034424_T001(292625000:292631323);Zm00001d034424_T002(292625000:292631329);MSTRG.11035.3(292625254:292631221);MSTRG.11035.4(292625256:292631170);MSTRG.11035.5(292625257:292635052);MSTRG.11035.6(292626036:292631306);Zm00001d034424_T003(292626036:292631329);Zm00001d034424_T004(292626036:292631329);MSTRG.11035.9(292632571:292634976);MSTRG.11035.10(292632585:292664912);Zm00001d034425_T001(2926…
1	292911542	292911542	-	292911542	intergenic	MSTRG.11048	292910156-292912234	MSTRG.11048.1(292910156:292912234)
1	292916909	292916924	-	292916914	intergenic	MSTRG.11049	292916859-292928385	MSTRG.11049.1(292916859:292928385);MSTRG.11049.2(292916859:292928385);MSTRG.11049.3(292917011:292928385)
1	292916965	292917058	-	292917058	intergenic	MSTRG.11049	292916859-292928385	MSTRG.11049.1(292916859:292928385);MSTRG.11049.2(292916859:292928385);MSTRG.11049.3(292917011:292928385)
1	292917326	292917344	-	292917344	intergenic	MSTRG.11049	292916859-292928385	MSTRG.11049.1(292916859:292928385);MSTRG.11049.2(292916859:292928385);MSTRG.11049.3(292917011:292928385)
1	292917372	292917385	-	292917377	intergenic	MSTRG.11049	292916859-292928385	MSTRG.11049.1(292916859:292928385);MSTRG.11049.2(292916859:292928385);MSTRG.11049.3(292917011:292928385)
1	292917441	292917441	-	292917441	intergenic	MSTRG.11049	292916859-292928385	MSTRG.11049.1(292916859:292928385);MSTRG.11049.2(292916859:292928385);MSTRG.11049.3(292917011:292928385)
1	292917468	292917488	-	292917468	intergenic	MSTRG.11049	292916859-292928385	MSTRG.11049.1(292916859:292928385);MSTRG.11049.2(292916859:292928385);MSTRG.11049.3(292917011:292928385)
1	292918086	292918086	-	292918086	intergenic	MSTRG.11049	292916859-292928385	MSTRG.11049.1(292916859:292928385);MSTRG.11049.2(292916859:292928385);MSTRG.11049.3(292917011:292928385)
1	292918167	292918167	-	292918167	intergenic	MSTRG.11049	292916859-292928385	MSTRG.11049.1(292916859:292928385);MSTRG.11049.2(292916859:292928385);MSTRG.11049.3(292917011:292928385)
1	292919860	292919864	-	292919863	intergenic	MSTRG.11049	292916859-292928385	MSTRG.11049.1(292916859:292928385);MSTRG.11049.2(292916859:292928385);MSTRG.11049.3(292917011:292928385)
1	293921276	293921345	-	293921342	intergenic	MSTRG.11094	293921191-293922708	MSTRG.11094.1(293921191:293922708)
1	293921371	293921371	-	293921371	intergenic	MSTRG.11094	293921191-293922708	MSTRG.11094.1(293921191:293922708)
1	293922001	293922031	-	293922022	intergenic	MSTRG.11094	293921191-293922708	MSTRG.11094.1(293921191:293922708)
1	293922186	293922186	-	293922186	intergenic	MSTRG.11094	293921191-293922708	MSTRG.11094.1(293921191:293922708)
1	293922259	293922324	-	293922277	intergenic	MSTRG.11094	293921191-293922708	MSTRG.11094.1(293921191:293922708)
1	294670927	294670927	-	294670927	intergenic	MSTRG.11131	294670630-294671561	MSTRG.11131.1(294670630:294671561)
1	294671370	294671370	-	294671370	intergenic	MSTRG.11131	294670630-294671561	MSTRG.11131.1(294670630:294671561)
1	294729063	294729063	-	294729063	intergenic	MSTRG.11135	294729004-294731653	MSTRG.11135.1(294729004:294731653)
1	294961384	294961384	-	294961384	intergenic	MSTRG.11147	294959853-294963411	MSTRG.11147.1(294959853:294963411);MSTRG.11147.2(294960993:294963223)
1	294962790	294962790	-	294962790	intergenic	MSTRG.11147	294959853-294963411	MSTRG.11147.1(294959853:294963411);MSTRG.11147.2(294960993:294963223)
1	294976994	294977017	-	294977006	intergenic	MSTRG.11149	294976993-294980896	MSTRG.11149.1(294976993:294980896);Zm00001d034508_T001(294977406:294980797)
1	294977080	294977115	-	294977080	intergenic	MSTRG.11149	294976993-294980896	MSTRG.11149.1(294976993:294980896);Zm00001d034508_T001(294977406:294980797)
1	294977148	294977149	-	294977148	intergenic	MSTRG.11149	294976993-294980896	MSTRG.11149.1(294976993:294980896);Zm00001d034508_T001(294977406:294980797)
1	294977192	294977209	-	294977192	intergenic	MSTRG.11149	294976993-294980896	MSTRG.11149.1(294976993:294980896);Zm00001d034508_T001(294977406:294980797)
1	295585736	295585736	-	295585736	intergenic	MSTRG.11168	295585671-295590200	MSTRG.11168.1(295585671:295590200)
1	296749447	296749447	-	296749447	intergenic	MSTRG.11260	296749427-296750028	MSTRG.11260.1(296749427:296750028)
1	297422129	297422129	-	297422129	intergenic	MSTRG.11293	297421849-297422616	MSTRG.11293.1(297421849:297422616)
1	297474122	297474122	-	297474122	intergenic	MSTRG.11298	297473575-297474226	MSTRG.11298.1(297473575:297474226)
1	297658065	297658075	-	297658065	intergenic	MSTRG.11308	297620436-297706979	MSTRG.11308.1(297620436:297621741);MSTRG.11308.2(297620575:297621780);MSTRG.11308.3(297620650:297706979);MSTRG.11308.4(297620713:297621780);Zm00001d034605_T001(297620879:297621595)
1	298061393	298061393	-	298061393	intergenic	MSTRG.11343	298057969-298062603	MSTRG.11343.1(298057969:298062603)
1	298573263	298573265	-	298573263	intergenic	MSTRG.11368	298548893-298575017	MSTRG.11368.1(298548893:298572838);Zm00001d034633_T001(298548893:298551096);Zm00001d034633_T004(298548897:298572907);Zm00001d034633_T003(298548897:298572851);Zm00001d034633_T006(298548927:298572861);Zm00001d034633_T007(298548930:298572872);MSTRG.11368.7(298548932:298572572);Zm00001d034633_T009(298548932:298565182);MSTRG.11368.9(298548958:298575017);Zm00001d034633_T011(298548960:298572892);Zm00001…
1	298573332	298573354	-	298573337	intergenic	MSTRG.11368	298548893-298575017	MSTRG.11368.1(298548893:298572838);Zm00001d034633_T001(298548893:298551096);Zm00001d034633_T004(298548897:298572907);Zm00001d034633_T003(298548897:298572851);Zm00001d034633_T006(298548927:298572861);Zm00001d034633_T007(298548930:298572872);MSTRG.11368.7(298548932:298572572);Zm00001d034633_T009(298548932:298565182);MSTRG.11368.9(298548958:298575017);Zm00001d034633_T011(298548960:298572892);Zm00001…
1	298573397	298573402	-	298573401	intergenic	MSTRG.11368	298548893-298575017	MSTRG.11368.1(298548893:298572838);Zm00001d034633_T001(298548893:298551096);Zm00001d034633_T004(298548897:298572907);Zm00001d034633_T003(298548897:298572851);Zm00001d034633_T006(298548927:298572861);Zm00001d034633_T007(298548930:298572872);MSTRG.11368.7(298548932:298572572);Zm00001d034633_T009(298548932:298565182);MSTRG.11368.9(298548958:298575017);Zm00001d034633_T011(298548960:298572892);Zm00001…
1	298703915	298703915	-	298703915	intergenic	MSTRG.11380	298694457-298774257	MSTRG.11380.1(298694457:298764905);Zm00001d034649_T001(298761458:298764905);MSTRG.11380.3(298761517:298774257);Zm00001d034649_T002(298761517:298764819);Zm00001d034649_T003(298761639:298764723)
1	299193969	299194025	-	299193993	intergenic	MSTRG.11404	299193991-299196764	MSTRG.11404.1(299193991:299196764);MSTRG.11404.2(299194181:299196764);Zm00001d034663_T001(299194181:299196764)
1	299608779	299608822	-	299608799	intergenic	MSTRG.11429	299603375-299618412	MSTRG.11429.1(299603375:299618408);MSTRG.11429.2(299603375:299618295);MSTRG.11429.3(299603375:299618412);MSTRG.11429.4(299603375:299608032);Zm00001d034675_T003(299603375:299607983);Zm00001d034675_T002(299603375:299608703);MSTRG.11429.7(299603384:299618295);MSTRG.11429.8(299603404:299608703);MSTRG.11429.9(299603410:299618295);Zm00001d034676_T001(299606219:299608703);MSTRG.11429.11(299606690:299618…
1	299608970	299609046	-	299609007	intergenic	MSTRG.11429	299603375-299618412	MSTRG.11429.1(299603375:299618408);MSTRG.11429.2(299603375:299618295);MSTRG.11429.3(299603375:299618412);MSTRG.11429.4(299603375:299608032);Zm00001d034675_T003(299603375:299607983);Zm00001d034675_T002(299603375:299608703);MSTRG.11429.7(299603384:299618295);MSTRG.11429.8(299603404:299608703);MSTRG.11429.9(299603410:299618295);Zm00001d034676_T001(299606219:299608703);MSTRG.11429.11(299606690:299618…
1	299609121	299609121	-	299609121	intergenic	MSTRG.11429	299603375-299618412	MSTRG.11429.1(299603375:299618408);MSTRG.11429.2(299603375:299618295);MSTRG.11429.3(299603375:299618412);MSTRG.11429.4(299603375:299608032);Zm00001d034675_T003(299603375:299607983);Zm00001d034675_T002(299603375:299608703);MSTRG.11429.7(299603384:299618295);MSTRG.11429.8(299603404:299608703);MSTRG.11429.9(299603410:299618295);Zm00001d034676_T001(299606219:299608703);MSTRG.11429.11(299606690:299618…
1	299644830	299644889	-	299644848	intergenic	MSTRG.11439	299644770-299647240	MSTRG.11439.1(299644770:299647240);Zm00001d034680_T001(299646950:299647240)
1	299644944	299644962	-	299644951	intergenic	MSTRG.11439	299644770-299647240	MSTRG.11439.1(299644770:299647240);Zm00001d034680_T001(299646950:299647240)
1	300526482	300526484	-	300526482	intergenic	MSTRG.11475	300523353-300527560	MSTRG.11475.1(300523353:300527560)
1	301250739	301250739	-	301250739	intergenic	MSTRG.11531	301188841-301251381	MSTRG.11531.1(301188841:301251381);Zm00001d034746_T001(301188841:301189452)
1	301250951	301250951	-	301250951	intergenic	MSTRG.11531	301188841-301251381	MSTRG.11531.1(301188841:301251381);Zm00001d034746_T001(301188841:301189452)
1	301478827	301478847	-	301478828	intergenic	MSTRG.11552	301478222-301523215	MSTRG.11552.1(301478222:301523215);Zm00001d034756_T001(301479326:301479550)
1	301735084	301735094	-	301735084	intergenic	MSTRG.11571	301729871-301960322	MSTRG.11571.1(301729871:301960243);MSTRG.11571.2(301729871:301960219);MSTRG.11571.3(301729871:301960255);Zm00001d034771_T002(301729871:301734996);Zm00001d034771_T001(301729871:301733794);MSTRG.11571.6(301729894:301960114);MSTRG.11571.7(301729894:301960114);MSTRG.11571.8(301729912:301817503);MSTRG.11571.9(301729927:301817488);MSTRG.11571.10(301729927:301734910);MSTRG.11571.11(301729928:301817497);…
1	302534778	302534831	-	302534798	intergenic	MSTRG.11617;MSTRG.11619	302526875-302541414;302533884-302535545	MSTRG.11617.1(302526875:302541249);MSTRG.11617.2(302526905:302529999);MSTRG.11617.3(302526905:302529936);MSTRG.11617.4(302526965:302529729);Zm00001d034809_T002(302535593:302541414);Zm00001d034809_T001(302535593:302541414);Zm00001d034809_T004(302535593:302541414);Zm00001d034809_T003(302535593:302541414);Zm00001d034809_T005(302535604:302540753);Zm00001d034809_T007(302535604:302541142);Zm00001d03480…
1	303724473	303724473	-	303724473	intergenic	MSTRG.11686	303721462-303729740	MSTRG.11686.1(303721462:303729740)
1	303789927	303789962	-	303789957	intergenic	MSTRG.11692	303789747-303793395	MSTRG.11692.1(303789747:303793395);MSTRG.11692.2(303789978:303793272);Zm00001d034849_T001(303792655:303793395)
1	303789996	303790078	-	303790015	intergenic	MSTRG.11692	303789747-303793395	MSTRG.11692.1(303789747:303793395);MSTRG.11692.2(303789978:303793272);Zm00001d034849_T001(303792655:303793395)
1	303790973	303790973	-	303790973	intergenic	MSTRG.11692	303789747-303793395	MSTRG.11692.1(303789747:303793395);MSTRG.11692.2(303789978:303793272);Zm00001d034849_T001(303792655:303793395)
1	303791306	303791306	-	303791306	intergenic	MSTRG.11692	303789747-303793395	MSTRG.11692.1(303789747:303793395);MSTRG.11692.2(303789978:303793272);Zm00001d034849_T001(303792655:303793395)
1	303791429	303791431	-	303791429	intergenic	MSTRG.11692	303789747-303793395	MSTRG.11692.1(303789747:303793395);MSTRG.11692.2(303789978:303793272);Zm00001d034849_T001(303792655:303793395)
1	303811023	303811034	-	303811023	intergenic	MSTRG.11694	303807770-303812633	MSTRG.11694.1(303807770:303812633)
1	304527463	304527513	-	304527493	intergenic	MSTRG.11742	304527300-304532874	MSTRG.11742.1(304527300:304532874);Zm00001d034878_T001(304528151:304532805)
1	304582600	304582607	-	304582607	intergenic	MSTRG.11745	304582606-304585959	MSTRG.11745.1(304582606:304585959);MSTRG.11745.2(304582613:304585959);Zm00001d034879_T001(304583080:304585959)
1	305106506	305106506	-	305106506	intergenic	MSTRG.11782	305106400-305216319	MSTRG.11782.1(305106400:305215919);MSTRG.11782.2(305106400:305113698);MSTRG.11782.3(305106400:305113647);MSTRG.11782.4(305106400:305215919);MSTRG.11782.5(305106554:305215902);Zm00001d034900_T001(305107084:305113715);Zm00001d034900_T002(305107112:305114359);Zm00001d034900_T003(305107133:305114359);Zm00001d034900_T004(305107563:305114359);MSTRG.11782.10(305195168:305216319);MSTRG.11782.11(305195168…
1	305106540	305106555	-	305106540	intergenic	MSTRG.11782	305106400-305216319	MSTRG.11782.1(305106400:305215919);MSTRG.11782.2(305106400:305113698);MSTRG.11782.3(305106400:305113647);MSTRG.11782.4(305106400:305215919);MSTRG.11782.5(305106554:305215902);Zm00001d034900_T001(305107084:305113715);Zm00001d034900_T002(305107112:305114359);Zm00001d034900_T003(305107133:305114359);Zm00001d034900_T004(305107563:305114359);MSTRG.11782.10(305195168:305216319);MSTRG.11782.11(305195168…
1	305106820	305106841	-	305106841	intergenic	MSTRG.11782	305106400-305216319	MSTRG.11782.1(305106400:305215919);MSTRG.11782.2(305106400:305113698);MSTRG.11782.3(305106400:305113647);MSTRG.11782.4(305106400:305215919);MSTRG.11782.5(305106554:305215902);Zm00001d034900_T001(305107084:305113715);Zm00001d034900_T002(305107112:305114359);Zm00001d034900_T003(305107133:305114359);Zm00001d034900_T004(305107563:305114359);MSTRG.11782.10(305195168:305216319);MSTRG.11782.11(305195168…
1	56313	56313	+	56313	intergenic	MSTRG.756	55832-56476	MSTRG.756.1(55832:56476)
1	56380	56427	+	56417	intergenic	MSTRG.756	55832-56476	MSTRG.756.1(55832:56476)
1	263513	263513	+	263513	intergenic	MSTRG.771	262882-265557	MSTRG.771.1(262882:265557)
1	263542	263542	+	263542	intergenic	MSTRG.771	262882-265557	MSTRG.771.1(262882:265557)
1	325177	325177	+	325177	intergenic	MSTRG.772	324881-325325	MSTRG.772.1(324881:325325)
1	325261	325261	+	325261	intergenic	MSTRG.772	324881-325325	MSTRG.772.1(324881:325325)
1	1841912	1841912	+	1841912	intergenic	MSTRG.834	1841774-1939608	MSTRG.834.1(1841774:1865355);MSTRG.834.2(1841842:1939438);MSTRG.834.3(1841877:1888798);MSTRG.834.4(1868953:1939409);MSTRG.834.5(1938598:1939294);MSTRG.834.6(1938602:1939485);MSTRG.834.7(1938602:1939478);MSTRG.834.8(1938612:1939472);MSTRG.834.9(1938619:1939608);MSTRG.834.10(1938619:1939608);MSTRG.834.11(1938619:1939608);MSTRG.834.12(1938702:1939566);MSTRG.834.13(1938725:1939294);MSTRG.834.14(19387…
1	1916308	1916310	+	1916310	intergenic	MSTRG.834	1841774-1939608	MSTRG.834.1(1841774:1865355);MSTRG.834.2(1841842:1939438);MSTRG.834.3(1841877:1888798);MSTRG.834.4(1868953:1939409);MSTRG.834.5(1938598:1939294);MSTRG.834.6(1938602:1939485);MSTRG.834.7(1938602:1939478);MSTRG.834.8(1938612:1939472);MSTRG.834.9(1938619:1939608);MSTRG.834.10(1938619:1939608);MSTRG.834.11(1938619:1939608);MSTRG.834.12(1938702:1939566);MSTRG.834.13(1938725:1939294);MSTRG.834.14(19387…
1	3038877	3038882	+	3038882	intergenic	MSTRG.906	3037362-3039011	MSTRG.906.1(3037362:3039011)
1	3492279	3492279	+	3492279	intergenic	MSTRG.955	3489406-3496897	MSTRG.955.1(3489406:3496820);Zm00001d027352_T001(3489406:3491807);Zm00001d027352_T002(3489432:3491757);MSTRG.955.4(3496168:3496897)
1	3492365	3492365	+	3492365	intergenic	MSTRG.955	3489406-3496897	MSTRG.955.1(3489406:3496820);Zm00001d027352_T001(3489406:3491807);Zm00001d027352_T002(3489432:3491757);MSTRG.955.4(3496168:3496897)
1	3492444	3492444	+	3492444	intergenic	MSTRG.955	3489406-3496897	MSTRG.955.1(3489406:3496820);Zm00001d027352_T001(3489406:3491807);Zm00001d027352_T002(3489432:3491757);MSTRG.955.4(3496168:3496897)
1	3495217	3495217	+	3495217	intergenic	MSTRG.955	3489406-3496897	MSTRG.955.1(3489406:3496820);Zm00001d027352_T001(3489406:3491807);Zm00001d027352_T002(3489432:3491757);MSTRG.955.4(3496168:3496897)
1	3495253	3495282	+	3495267	intergenic	MSTRG.955	3489406-3496897	MSTRG.955.1(3489406:3496820);Zm00001d027352_T001(3489406:3491807);Zm00001d027352_T002(3489432:3491757);MSTRG.955.4(3496168:3496897)
1	3495318	3495326	+	3495318	intergenic	MSTRG.955	3489406-3496897	MSTRG.955.1(3489406:3496820);Zm00001d027352_T001(3489406:3491807);Zm00001d027352_T002(3489432:3491757);MSTRG.955.4(3496168:3496897)
1	3575720	3575740	+	3575740	intergenic	MSTRG.964	3575487-3576165	MSTRG.964.1(3575487:3576165)
1	3858249	3858249	+	3858249	intergenic	MSTRG.988	3857489-3858368	MSTRG.988.1(3857489:3858368)
1	3858289	3858340	+	3858313	intergenic	MSTRG.988	3857489-3858368	MSTRG.988.1(3857489:3858368)
1	4121244	4121244	+	4121244	intergenic	MSTRG.1012	4120862-4124415	MSTRG.1012.1(4120862:4122899);MSTRG.1012.2(4120936:4124415)
1	4122891	4122891	+	4122891	intergenic	MSTRG.1012	4120862-4124415	MSTRG.1012.1(4120862:4122899);MSTRG.1012.2(4120936:4124415)
1	4125315	4125315	+	4125315	intergenic	MSTRG.1013	4123371-4126287	MSTRG.1013.1(4123371:4126287);MSTRG.1013.2(4124426:4125199)
1	4148563	4148563	+	4148563	intergenic	MSTRG.1017	4142157-4158120	MSTRG.1017.1(4142157:4158120)
1	4319915	4319915	+	4319915	intergenic	MSTRG.1024	4288462-4368061	MSTRG.1024.1(4288462:4351530);MSTRG.1024.2(4288462:4340798);MSTRG.1024.3(4298473:4340800);MSTRG.1024.4(4340135:4368061);Zm00001d027394_T001(4340135:4340790);Zm00001d027395_T002(4341041:4351530);Zm00001d027395_T001(4341041:4351530);Zm00001d027395_T006(4341127:4351180);Zm00001d027395_T008(4341190:4344731);Zm00001d027395_T009(4341856:4351530)
1	4320296	4320296	+	4320296	intergenic	MSTRG.1024	4288462-4368061	MSTRG.1024.1(4288462:4351530);MSTRG.1024.2(4288462:4340798);MSTRG.1024.3(4298473:4340800);MSTRG.1024.4(4340135:4368061);Zm00001d027394_T001(4340135:4340790);Zm00001d027395_T002(4341041:4351530);Zm00001d027395_T001(4341041:4351530);Zm00001d027395_T006(4341127:4351180);Zm00001d027395_T008(4341190:4344731);Zm00001d027395_T009(4341856:4351530)
1	4320363	4320368	+	4320363	intergenic	MSTRG.1024	4288462-4368061	MSTRG.1024.1(4288462:4351530);MSTRG.1024.2(4288462:4340798);MSTRG.1024.3(4298473:4340800);MSTRG.1024.4(4340135:4368061);Zm00001d027394_T001(4340135:4340790);Zm00001d027395_T002(4341041:4351530);Zm00001d027395_T001(4341041:4351530);Zm00001d027395_T006(4341127:4351180);Zm00001d027395_T008(4341190:4344731);Zm00001d027395_T009(4341856:4351530)
1	4980034	4980145	+	4980054	intergenic	MSTRG.1067	4979176-4994689	MSTRG.1067.1(4979176:4994689);MSTRG.1067.2(4979273:4994617)
1	4980286	4980286	+	4980286	intergenic	MSTRG.1067	4979176-4994689	MSTRG.1067.1(4979176:4994689);MSTRG.1067.2(4979273:4994617)
1	4980358	4980376	+	4980358	intergenic	MSTRG.1067	4979176-4994689	MSTRG.1067.1(4979176:4994689);MSTRG.1067.2(4979273:4994617)
1	4980407	4980435	+	4980409	intergenic	MSTRG.1067	4979176-4994689	MSTRG.1067.1(4979176:4994689);MSTRG.1067.2(4979273:4994617)
1	4980538	4980554	+	4980554	intergenic	MSTRG.1067	4979176-4994689	MSTRG.1067.1(4979176:4994689);MSTRG.1067.2(4979273:4994617)
1	4980585	4980608	+	4980585	intergenic	MSTRG.1067	4979176-4994689	MSTRG.1067.1(4979176:4994689);MSTRG.1067.2(4979273:4994617)
1	4980701	4980722	+	4980701	intergenic	MSTRG.1067	4979176-4994689	MSTRG.1067.1(4979176:4994689);MSTRG.1067.2(4979273:4994617)
1	4989776	4989785	+	4989776	intergenic	MSTRG.1067	4979176-4994689	MSTRG.1067.1(4979176:4994689);MSTRG.1067.2(4979273:4994617)
1	5116481	5116759	+	5116702	intergenic	MSTRG.1075	5111039-5124898	MSTRG.1075.1(5111039:5124898);Zm00001d027430_T001(5111247:5116316);Zm00001d027430_T002(5111300:5116316);MSTRG.1075.4(5112148:5117678)
1	5117408	5117408	+	5117408	intergenic	MSTRG.1075	5111039-5124898	MSTRG.1075.1(5111039:5124898);Zm00001d027430_T001(5111247:5116316);Zm00001d027430_T002(5111300:5116316);MSTRG.1075.4(5112148:5117678)
1	5136073	5136096	+	5136073	intergenic	MSTRG.1080	5134438-5136158	MSTRG.1080.1(5134438:5136071);MSTRG.1080.2(5134487:5136135);MSTRG.1080.3(5134853:5136158)
1	5144835	5144875	+	5144851	intergenic	MSTRG.1085	5143524-5144985	MSTRG.1085.1(5143524:5144985)
1	5144963	5144984	+	5144984	intergenic	MSTRG.1085	5143524-5144985	MSTRG.1085.1(5143524:5144985)
1	5420267	5420267	+	5420267	intergenic	MSTRG.1099	5417614-5420381	MSTRG.1099.1(5417614:5420381)
1	5812567	5812645	+	5812608	intergenic	MSTRG.1143	5790257-5812962	MSTRG.1143.1(5790257:5812962);MSTRG.1143.2(5790257:5812840);MSTRG.1143.3(5790282:5812940);MSTRG.1143.4(5790313:5812942);MSTRG.1143.5(5799244:5812949);Zm00001d027460_T001(5799244:5810862);Zm00001d027460_T002(5799244:5810862)
1	5812671	5812792	+	5812721	intergenic	MSTRG.1143	5790257-5812962	MSTRG.1143.1(5790257:5812962);MSTRG.1143.2(5790257:5812840);MSTRG.1143.3(5790282:5812940);MSTRG.1143.4(5790313:5812942);MSTRG.1143.5(5799244:5812949);Zm00001d027460_T001(5799244:5810862);Zm00001d027460_T002(5799244:5810862)
1	5812839	5812856	+	5812839	intergenic	MSTRG.1143	5790257-5812962	MSTRG.1143.1(5790257:5812962);MSTRG.1143.2(5790257:5812840);MSTRG.1143.3(5790282:5812940);MSTRG.1143.4(5790313:5812942);MSTRG.1143.5(5799244:5812949);Zm00001d027460_T001(5799244:5810862);Zm00001d027460_T002(5799244:5810862)
1	6023929	6023929	+	6023929	intergenic	MSTRG.1158	5982138-6036244	MSTRG.1158.1(5982138:6036244);MSTRG.1158.2(6034724:6036139);Zm00001d027471_T001(6034724:6035902)
1	6236777	6236777	+	6236777	intergenic	MSTRG.1165	6236579-6236834	MSTRG.1165.1(6236579:6236834)
1	6311558	6311583	+	6311580	intergenic	MSTRG.1180	6311480-6312092	MSTRG.1180.1(6311480:6312092)
1	6311658	6311658	+	6311658	intergenic	MSTRG.1180	6311480-6312092	MSTRG.1180.1(6311480:6312092)
1	8020949	8020949	+	8020949	intergenic	MSTRG.1274	8005504-8047775	MSTRG.1274.1(8005504:8047761);MSTRG.1274.2(8046302:8047751);MSTRG.1274.3(8046302:8047775);MSTRG.1274.4(8046302:8047760);Zm00001d027548_T001(8046302:8047417)
1	8021008	8021027	+	8021027	intergenic	MSTRG.1274	8005504-8047775	MSTRG.1274.1(8005504:8047761);MSTRG.1274.2(8046302:8047751);MSTRG.1274.3(8046302:8047775);MSTRG.1274.4(8046302:8047760);Zm00001d027548_T001(8046302:8047417)
1	8043376	8043377	+	8043376	intergenic	MSTRG.1274	8005504-8047775	MSTRG.1274.1(8005504:8047761);MSTRG.1274.2(8046302:8047751);MSTRG.1274.3(8046302:8047775);MSTRG.1274.4(8046302:8047760);Zm00001d027548_T001(8046302:8047417)
1	9007740	9007758	+	9007758	intergenic	MSTRG.1356;MSTRG.1361	8951815-9034955;8981879-9007851	MSTRG.1356.1(8951815:9010523);MSTRG.1356.2(9008997:9013372);MSTRG.1356.3(9009147:9034955);MSTRG.1361.1(8981879:9007851);Zm00001d027611_T001(8981882:8983387)
1	9007800	9007806	+	9007800	intergenic	MSTRG.1356;MSTRG.1361	8951815-9034955;8981879-9007851	MSTRG.1356.1(8951815:9010523);MSTRG.1356.2(9008997:9013372);MSTRG.1356.3(9009147:9034955);MSTRG.1361.1(8981879:9007851);Zm00001d027611_T001(8981882:8983387)
1	9007849	9007852	+	9007851	intergenic	MSTRG.1356;MSTRG.1361	8951815-9034955;8981879-9007851	MSTRG.1356.1(8951815:9010523);MSTRG.1356.2(9008997:9013372);MSTRG.1356.3(9009147:9034955);MSTRG.1361.1(8981879:9007851);Zm00001d027611_T001(8981882:8983387)
1	9111403	9111443	+	9111406	intergenic	MSTRG.1365	9091304-9115668	MSTRG.1365.1(9091304:9115541);MSTRG.1365.2(9102338:9115668);Zm00001d027618_T001(9112947:9115668)
1	9629879	9629925	+	9629912	intergenic	MSTRG.1396	9547625-9630191	Zm00001d027633_T004(9547625:9584429);Zm00001d027633_T005(9547625:9584429);Zm00001d027633_T003(9547625:9584429);Zm00001d027633_T001(9547625:9584429);Zm00001d027633_T002(9547625:9584429);Zm00001d027633_T012(9547625:9612900);Zm00001d027633_T008(9547625:9612900);Zm00001d027633_T011(9547625:9612900);Zm00001d027633_T007(9547625:9612900);Zm00001d027633_T006(9547625:9612900);Zm00001d027633_T010(9547625:9…
1	9629950	9629950	+	9629950	intergenic	MSTRG.1396	9547625-9630191	Zm00001d027633_T004(9547625:9584429);Zm00001d027633_T005(9547625:9584429);Zm00001d027633_T003(9547625:9584429);Zm00001d027633_T001(9547625:9584429);Zm00001d027633_T002(9547625:9584429);Zm00001d027633_T012(9547625:9612900);Zm00001d027633_T008(9547625:9612900);Zm00001d027633_T011(9547625:9612900);Zm00001d027633_T007(9547625:9612900);Zm00001d027633_T006(9547625:9612900);Zm00001d027633_T010(9547625:9…
1	9629993	9629993	+	9629993	intergenic	MSTRG.1396	9547625-9630191	Zm00001d027633_T004(9547625:9584429);Zm00001d027633_T005(9547625:9584429);Zm00001d027633_T003(9547625:9584429);Zm00001d027633_T001(9547625:9584429);Zm00001d027633_T002(9547625:9584429);Zm00001d027633_T012(9547625:9612900);Zm00001d027633_T008(9547625:9612900);Zm00001d027633_T011(9547625:9612900);Zm00001d027633_T007(9547625:9612900);Zm00001d027633_T006(9547625:9612900);Zm00001d027633_T010(9547625:9…
1	9630018	9630032	+	9630032	intergenic	MSTRG.1396	9547625-9630191	Zm00001d027633_T004(9547625:9584429);Zm00001d027633_T005(9547625:9584429);Zm00001d027633_T003(9547625:9584429);Zm00001d027633_T001(9547625:9584429);Zm00001d027633_T002(9547625:9584429);Zm00001d027633_T012(9547625:9612900);Zm00001d027633_T008(9547625:9612900);Zm00001d027633_T011(9547625:9612900);Zm00001d027633_T007(9547625:9612900);Zm00001d027633_T006(9547625:9612900);Zm00001d027633_T010(9547625:9…
1	9630066	9630127	+	9630086	intergenic	MSTRG.1396	9547625-9630191	Zm00001d027633_T004(9547625:9584429);Zm00001d027633_T005(9547625:9584429);Zm00001d027633_T003(9547625:9584429);Zm00001d027633_T001(9547625:9584429);Zm00001d027633_T002(9547625:9584429);Zm00001d027633_T012(9547625:9612900);Zm00001d027633_T008(9547625:9612900);Zm00001d027633_T011(9547625:9612900);Zm00001d027633_T007(9547625:9612900);Zm00001d027633_T006(9547625:9612900);Zm00001d027633_T010(9547625:9…
1	10491449	10491488	+	10491470	intergenic	MSTRG.1442	10490557-10491603	MSTRG.1442.1(10490557:10491603);MSTRG.1442.2(10490557:10491603);MSTRG.1442.3(10490717:10491587)
1	10491530	10491588	+	10491569	intergenic	MSTRG.1442	10490557-10491603	MSTRG.1442.1(10490557:10491603);MSTRG.1442.2(10490557:10491603);MSTRG.1442.3(10490717:10491587)
1	10859094	10859183	+	10859147	intergenic	MSTRG.1462	10854296-10859423	MSTRG.1462.1(10854296:10859423);Zm00001d027676_T001(10854296:10857324);MSTRG.1462.3(10856812:10859258)
1	10859226	10859256	+	10859226	intergenic	MSTRG.1462	10854296-10859423	MSTRG.1462.1(10854296:10859423);Zm00001d027676_T001(10854296:10857324);MSTRG.1462.3(10856812:10859258)
1	12043901	12043913	+	12043907	intergenic	MSTRG.1519	12042589-12044188	MSTRG.1519.1(12042589:12044188);Zm00001d027717_T001(12042589:12043629)
1	12044055	12044068	+	12044055	intergenic	MSTRG.1519	12042589-12044188	MSTRG.1519.1(12042589:12044188);Zm00001d027717_T001(12042589:12043629)
1	12138221	12138239	+	12138221	intergenic	MSTRG.1522	12103754-12138707	MSTRG.1522.1(12103754:12138707);Zm00001d027719_T001(12103775:12105421);MSTRG.1522.3(12103837:12138594);MSTRG.1522.4(12103848:12138611)
1	12138416	12138416	+	12138416	intergenic	MSTRG.1522	12103754-12138707	MSTRG.1522.1(12103754:12138707);Zm00001d027719_T001(12103775:12105421);MSTRG.1522.3(12103837:12138594);MSTRG.1522.4(12103848:12138611)
1	12138462	12138636	+	12138568	intergenic	MSTRG.1522	12103754-12138707	MSTRG.1522.1(12103754:12138707);Zm00001d027719_T001(12103775:12105421);MSTRG.1522.3(12103837:12138594);MSTRG.1522.4(12103848:12138611)
1	12138691	12138691	+	12138691	intergenic	MSTRG.1522	12103754-12138707	MSTRG.1522.1(12103754:12138707);Zm00001d027719_T001(12103775:12105421);MSTRG.1522.3(12103837:12138594);MSTRG.1522.4(12103848:12138611)
1	12175741	12175774	+	12175753	intergenic	MSTRG.1527	12170863-12176016	MSTRG.1527.1(12170863:12176016);Zm00001d027722_T001(12170863:12175121);Zm00001d027722_T002(12170863:12175121);Zm00001d027722_T003(12171285:12175121)
1	12175853	12175911	+	12175882	intergenic	MSTRG.1527	12170863-12176016	MSTRG.1527.1(12170863:12176016);Zm00001d027722_T001(12170863:12175121);Zm00001d027722_T002(12170863:12175121);Zm00001d027722_T003(12171285:12175121)
1	12448929	12448929	+	12448929	intergenic	MSTRG.1542	12354705-12450708	MSTRG.1542.1(12354705:12359572);MSTRG.1542.2(12354728:12450708);MSTRG.1542.3(12354755:12359438);MSTRG.1542.4(12354840:12359393);Zm00001d027741_T001(12444329:12446126);MSTRG.1542.6(12444376:12449269);MSTRG.1542.7(12444412:12449426);MSTRG.1542.8(12444487:12449050);MSTRG.1542.9(12444494:12448291)
1	12512323	12512327	+	12512327	intergenic	MSTRG.1563	12510999-12531966	MSTRG.1563.1(12510999:12531941);Zm00001d027744_T001(12510999:12511508);MSTRG.1563.3(12511103:12531878);MSTRG.1563.4(12511192:12531914);Zm00001d027745_T004(12528993:12531966);Zm00001d027745_T002(12528993:12530489);Zm00001d027745_T001(12528993:12530489);Zm00001d027745_T003(12528993:12531966)
1	12512430	12512430	+	12512430	intergenic	MSTRG.1563	12510999-12531966	MSTRG.1563.1(12510999:12531941);Zm00001d027744_T001(12510999:12511508);MSTRG.1563.3(12511103:12531878);MSTRG.1563.4(12511192:12531914);Zm00001d027745_T004(12528993:12531966);Zm00001d027745_T002(12528993:12530489);Zm00001d027745_T001(12528993:12530489);Zm00001d027745_T003(12528993:12531966)
1	12851156	12851156	+	12851156	intergenic	MSTRG.1588	12847754-12851312	MSTRG.1588.1(12847754:12851312);Zm00001d027759_T001(12848106:12850651)
1	12851205	12851205	+	12851205	intergenic	MSTRG.1588	12847754-12851312	MSTRG.1588.1(12847754:12851312);Zm00001d027759_T001(12848106:12850651)
1	12851263	12851263	+	12851263	intergenic	MSTRG.1588	12847754-12851312	MSTRG.1588.1(12847754:12851312);Zm00001d027759_T001(12848106:12850651)
1	12851288	12851288	+	12851288	intergenic	MSTRG.1588	12847754-12851312	MSTRG.1588.1(12847754:12851312);Zm00001d027759_T001(12848106:12850651)
1	13166477	13166477	+	13166477	intergenic	MSTRG.1605	13161317-13176363	MSTRG.1605.1(13161317:13176363);MSTRG.1605.2(13162005:13166683);Zm00001d027768_T001(13166917:13172705);Zm00001d027768_T003(13166917:13176199);Zm00001d027768_T002(13166917:13176199);Zm00001d027768_T004(13166933:13176026);Zm00001d027768_T005(13166945:13176199);Zm00001d027768_T007(13166990:13176199);Zm00001d027768_T008(13166992:13172704);Zm00001d027768_T010(13167006:13176197);Zm00001d027768_T011(131…
1	13166523	13166523	+	13166523	intergenic	MSTRG.1605	13161317-13176363	MSTRG.1605.1(13161317:13176363);MSTRG.1605.2(13162005:13166683);Zm00001d027768_T001(13166917:13172705);Zm00001d027768_T003(13166917:13176199);Zm00001d027768_T002(13166917:13176199);Zm00001d027768_T004(13166933:13176026);Zm00001d027768_T005(13166945:13176199);Zm00001d027768_T007(13166990:13176199);Zm00001d027768_T008(13166992:13172704);Zm00001d027768_T010(13167006:13176197);Zm00001d027768_T011(131…
1	13166623	13166686	+	13166641	intergenic	MSTRG.1605	13161317-13176363	MSTRG.1605.1(13161317:13176363);MSTRG.1605.2(13162005:13166683);Zm00001d027768_T001(13166917:13172705);Zm00001d027768_T003(13166917:13176199);Zm00001d027768_T002(13166917:13176199);Zm00001d027768_T004(13166933:13176026);Zm00001d027768_T005(13166945:13176199);Zm00001d027768_T007(13166990:13176199);Zm00001d027768_T008(13166992:13172704);Zm00001d027768_T010(13167006:13176197);Zm00001d027768_T011(131…
1	13166713	13166732	+	13166732	intergenic	MSTRG.1605	13161317-13176363	MSTRG.1605.1(13161317:13176363);MSTRG.1605.2(13162005:13166683);Zm00001d027768_T001(13166917:13172705);Zm00001d027768_T003(13166917:13176199);Zm00001d027768_T002(13166917:13176199);Zm00001d027768_T004(13166933:13176026);Zm00001d027768_T005(13166945:13176199);Zm00001d027768_T007(13166990:13176199);Zm00001d027768_T008(13166992:13172704);Zm00001d027768_T010(13167006:13176197);Zm00001d027768_T011(131…
1	13533554	13533554	+	13533554	intergenic	MSTRG.1614	13528222-13533647	Zm00001d027789_T001(13528222:13533144);MSTRG.1614.2(13528800:13533636);Zm00001d027789_T002(13528800:13533144);MSTRG.1614.4(13532282:13533647)
1	13533613	13533613	+	13533613	intergenic	MSTRG.1614	13528222-13533647	Zm00001d027789_T001(13528222:13533144);MSTRG.1614.2(13528800:13533636);Zm00001d027789_T002(13528800:13533144);MSTRG.1614.4(13532282:13533647)
1	13591001	13591001	+	13591001	intergenic	MSTRG.1615	13576349-13591433	MSTRG.1615.1(13576349:13591433);MSTRG.1615.2(13576379:13591433);Zm00001d027790_T001(13576388:13580832)
1	13591047	13591047	+	13591047	intergenic	MSTRG.1615	13576349-13591433	MSTRG.1615.1(13576349:13591433);MSTRG.1615.2(13576379:13591433);Zm00001d027790_T001(13576388:13580832)
1	13591236	13591402	+	13591363	intergenic	MSTRG.1615	13576349-13591433	MSTRG.1615.1(13576349:13591433);MSTRG.1615.2(13576379:13591433);Zm00001d027790_T001(13576388:13580832)
1	13813812	13813849	+	13813835	intergenic	MSTRG.1626	13809656-13814356	MSTRG.1626.1(13809656:13814356);MSTRG.1626.2(13809656:13814168);Zm00001d027800_T001(13809656:13811605);MSTRG.1626.4(13809866:13814033);MSTRG.1626.5(13812232:13814029)
1	13814020	13814020	+	13814020	intergenic	MSTRG.1626	13809656-13814356	MSTRG.1626.1(13809656:13814356);MSTRG.1626.2(13809656:13814168);Zm00001d027800_T001(13809656:13811605);MSTRG.1626.4(13809866:13814033);MSTRG.1626.5(13812232:13814029)
1	13814074	13814083	+	13814074	intergenic	MSTRG.1626	13809656-13814356	MSTRG.1626.1(13809656:13814356);MSTRG.1626.2(13809656:13814168);Zm00001d027800_T001(13809656:13811605);MSTRG.1626.4(13809866:13814033);MSTRG.1626.5(13812232:13814029)
1	14256393	14256393	+	14256393	intergenic	MSTRG.1649	14255883-14256890	MSTRG.1649.1(14255883:14256890)
1	14318920	14318920	+	14318920	intergenic	MSTRG.1650	14300031-14323311	MSTRG.1650.1(14300031:14323005);Zm00001d027813_T002(14321650:14323311);MSTRG.1650.3(14321662:14322939);Zm00001d027813_T003(14321828:14322994)
1	14331236	14331236	+	14331236	intergenic	MSTRG.1657	14330172-14333150	MSTRG.1657.1(14330172:14331198);MSTRG.1657.2(14330769:14333150)
1	14605092	14605092	+	14605092	intergenic	MSTRG.1665	14585540-14605213	Zm00001d027824_T001(14585540:14587374);MSTRG.1665.2(14585580:14605213)
1	14605162	14605186	+	14605186	intergenic	MSTRG.1665	14585540-14605213	Zm00001d027824_T001(14585540:14587374);MSTRG.1665.2(14585580:14605213)
1	14673328	14673334	+	14673328	intergenic	MSTRG.1673	14665693-14673483	MSTRG.1673.1(14665693:14673483);Zm00001d027834_T001(14665693:14671725);Zm00001d027834_T002(14665693:14671725);Zm00001d027834_T003(14665693:14671725);MSTRG.1673.5(14665729:14673402);MSTRG.1673.6(14665729:14673432);MSTRG.1673.7(14665729:14673396);MSTRG.1673.8(14665729:14673394);MSTRG.1673.9(14665758:14673402);MSTRG.1673.10(14665758:14673402);MSTRG.1673.11(14665768:14673395);MSTRG.1673.12(14665768:1…
1	14697909	14697922	+	14697909	intergenic	MSTRG.1677	14689445-14698090	MSTRG.1677.1(14689445:14698090);Zm00001d027835_T001(14689445:14692321);MSTRG.1677.3(14689524:14698033);MSTRG.1677.4(14689524:14698033);MSTRG.1677.5(14689524:14698052);MSTRG.1677.6(14689524:14698052);MSTRG.1677.7(14689524:14698017);MSTRG.1677.8(14689524:14698052);MSTRG.1677.9(14689524:14698030);MSTRG.1677.10(14689524:14698017);MSTRG.1677.11(14689524:14698010);MSTRG.1677.12(14689524:14697412);MSTRG…
1	15646256	15646363	+	15646259	intergenic	MSTRG.1728	15628144-15646388	MSTRG.1728.1(15628144:15646388)
1	17148667	17148667	+	17148667	intergenic	MSTRG.1801	17068013-17157142	MSTRG.1801.1(17068013:17157111);MSTRG.1801.2(17156322:17157142);MSTRG.1801.3(17156322:17157136);Zm00001d027901_T001(17156322:17156867)
1	17165151	17165162	+	17165151	intergenic	MSTRG.1809	17163154-17167187	MSTRG.1809.1(17163154:17167102);MSTRG.1809.2(17163175:17167187);MSTRG.1809.3(17163385:17167176);Zm00001d027903_T001(17163385:17164632)
1	17167049	17167049	+	17167049	intergenic	MSTRG.1809	17163154-17167187	MSTRG.1809.1(17163154:17167102);MSTRG.1809.2(17163175:17167187);MSTRG.1809.3(17163385:17167176);Zm00001d027903_T001(17163385:17164632)
1	17167095	17167095	+	17167095	intergenic	MSTRG.1809	17163154-17167187	MSTRG.1809.1(17163154:17167102);MSTRG.1809.2(17163175:17167187);MSTRG.1809.3(17163385:17167176);Zm00001d027903_T001(17163385:17164632)
1	17325365	17325459	+	17325435	intergenic	MSTRG.1812	17314485-17325512	MSTRG.1812.1(17314485:17325443);Zm00001d027907_T001(17314485:17317861);MSTRG.1812.3(17314533:17325500);MSTRG.1812.4(17314705:17325413);Zm00001d027907_T002(17314705:17317861);MSTRG.1812.6(17314728:17325405);MSTRG.1812.7(17314872:17325512);MSTRG.1812.8(17315598:17325443);Zm00001d027907_T003(17315598:17317861);MSTRG.1812.10(17316056:17325397)
1	17325505	17325519	+	17325505	intergenic	MSTRG.1812	17314485-17325512	MSTRG.1812.1(17314485:17325443);Zm00001d027907_T001(17314485:17317861);MSTRG.1812.3(17314533:17325500);MSTRG.1812.4(17314705:17325413);Zm00001d027907_T002(17314705:17317861);MSTRG.1812.6(17314728:17325405);MSTRG.1812.7(17314872:17325512);MSTRG.1812.8(17315598:17325443);Zm00001d027907_T003(17315598:17317861);MSTRG.1812.10(17316056:17325397)
1	17806254	17806254	+	17806254	intergenic	MSTRG.1836	17805472-17806772	MSTRG.1836.1(17805472:17806772)
1	18051181	18051181	+	18051181	intergenic	MSTRG.1866	18050012-18052190	MSTRG.1866.1(18050012:18052154);MSTRG.1866.2(18050054:18052190);MSTRG.1866.3(18050316:18051513);Zm00001d027944_T001(18050316:18050693)
1	18151490	18151490	+	18151490	intergenic	MSTRG.1872	18132625-18161649	MSTRG.1872.1(18132625:18161649);MSTRG.1872.2(18132710:18161633);MSTRG.1872.3(18133312:18161646);Zm00001d027949_T001(18159860:18161446)
1	18462766	18462766	+	18462766	intergenic	MSTRG.1882	18420566-18513513	MSTRG.1882.1(18420566:18513196);MSTRG.1882.2(18436361:18513513);MSTRG.1882.3(18470685:18513426);MSTRG.1882.4(18505737:18513505);Zm00001d027965_T001(18511901:18513196);MSTRG.1882.6(18512001:18513461)
1	18462829	18462829	+	18462829	intergenic	MSTRG.1882	18420566-18513513	MSTRG.1882.1(18420566:18513196);MSTRG.1882.2(18436361:18513513);MSTRG.1882.3(18470685:18513426);MSTRG.1882.4(18505737:18513505);Zm00001d027965_T001(18511901:18513196);MSTRG.1882.6(18512001:18513461)
1	18472637	18472637	+	18472637	intergenic	MSTRG.1882	18420566-18513513	MSTRG.1882.1(18420566:18513196);MSTRG.1882.2(18436361:18513513);MSTRG.1882.3(18470685:18513426);MSTRG.1882.4(18505737:18513505);Zm00001d027965_T001(18511901:18513196);MSTRG.1882.6(18512001:18513461)
1	18760029	18760029	+	18760029	intergenic	MSTRG.1891	18759458-18771171	MSTRG.1891.1(18759458:18771141);MSTRG.1891.2(18759458:18771095);MSTRG.1891.3(18759458:18770788);MSTRG.1891.4(18759489:18770788);MSTRG.1891.5(18759506:18770788);MSTRG.1891.6(18759519:18771171);MSTRG.1891.7(18759536:18770788);MSTRG.1891.8(18759550:18770788);MSTRG.1891.9(18759556:18771095);Zm00001d027971_T001(18761417:18771036);Zm00001d027971_T002(18762607:18770980);Zm00001d027971_T003(18768372:1877…
1	18760068	18760070	+	18760070	intergenic	MSTRG.1891	18759458-18771171	MSTRG.1891.1(18759458:18771141);MSTRG.1891.2(18759458:18771095);MSTRG.1891.3(18759458:18770788);MSTRG.1891.4(18759489:18770788);MSTRG.1891.5(18759506:18770788);MSTRG.1891.6(18759519:18771171);MSTRG.1891.7(18759536:18770788);MSTRG.1891.8(18759550:18770788);MSTRG.1891.9(18759556:18771095);Zm00001d027971_T001(18761417:18771036);Zm00001d027971_T002(18762607:18770980);Zm00001d027971_T003(18768372:1877…
1	18760114	18760116	+	18760116	intergenic	MSTRG.1891	18759458-18771171	MSTRG.1891.1(18759458:18771141);MSTRG.1891.2(18759458:18771095);MSTRG.1891.3(18759458:18770788);MSTRG.1891.4(18759489:18770788);MSTRG.1891.5(18759506:18770788);MSTRG.1891.6(18759519:18771171);MSTRG.1891.7(18759536:18770788);MSTRG.1891.8(18759550:18770788);MSTRG.1891.9(18759556:18771095);Zm00001d027971_T001(18761417:18771036);Zm00001d027971_T002(18762607:18770980);Zm00001d027971_T003(18768372:1877…
1	18760235	18760235	+	18760235	intergenic	MSTRG.1891	18759458-18771171	MSTRG.1891.1(18759458:18771141);MSTRG.1891.2(18759458:18771095);MSTRG.1891.3(18759458:18770788);MSTRG.1891.4(18759489:18770788);MSTRG.1891.5(18759506:18770788);MSTRG.1891.6(18759519:18771171);MSTRG.1891.7(18759536:18770788);MSTRG.1891.8(18759550:18770788);MSTRG.1891.9(18759556:18771095);Zm00001d027971_T001(18761417:18771036);Zm00001d027971_T002(18762607:18770980);Zm00001d027971_T003(18768372:1877…
1	18760348	18760348	+	18760348	intergenic	MSTRG.1891	18759458-18771171	MSTRG.1891.1(18759458:18771141);MSTRG.1891.2(18759458:18771095);MSTRG.1891.3(18759458:18770788);MSTRG.1891.4(18759489:18770788);MSTRG.1891.5(18759506:18770788);MSTRG.1891.6(18759519:18771171);MSTRG.1891.7(18759536:18770788);MSTRG.1891.8(18759550:18770788);MSTRG.1891.9(18759556:18771095);Zm00001d027971_T001(18761417:18771036);Zm00001d027971_T002(18762607:18770980);Zm00001d027971_T003(18768372:1877…
1	19888264	19888277	+	19888277	intergenic	MSTRG.1929	19887764-19889591	MSTRG.1929.1(19887764:19889591)
1	19888948	19888948	+	19888948	intergenic	MSTRG.1929	19887764-19889591	MSTRG.1929.1(19887764:19889591)
1	20614781	20614783	+	20614783	intergenic	MSTRG.1976	20604487-20615187	Zm00001d028022_T001(20604487:20614451);MSTRG.1976.2(20604624:20615187);Zm00001d028022_T003(20604624:20614451)
1	20614809	20614868	+	20614868	intergenic	MSTRG.1976	20604487-20615187	Zm00001d028022_T001(20604487:20614451);MSTRG.1976.2(20604624:20615187);Zm00001d028022_T003(20604624:20614451)
1	20614923	20614967	+	20614957	intergenic	MSTRG.1976	20604487-20615187	Zm00001d028022_T001(20604487:20614451);MSTRG.1976.2(20604624:20615187);Zm00001d028022_T003(20604624:20614451)
1	20614992	20615007	+	20614992	intergenic	MSTRG.1976	20604487-20615187	Zm00001d028022_T001(20604487:20614451);MSTRG.1976.2(20604624:20615187);Zm00001d028022_T003(20604624:20614451)
1	20742575	20742575	+	20742575	intergenic	MSTRG.1980	20723764-20743512	MSTRG.1980.1(20723764:20742329);MSTRG.1980.2(20723764:20742207);MSTRG.1980.3(20740532:20742194);MSTRG.1980.4(20740613:20742194);MSTRG.1980.5(20740613:20742244);MSTRG.1980.6(20740613:20742199);MSTRG.1980.7(20740613:20742142);MSTRG.1980.8(20740613:20741926);MSTRG.1980.9(20740613:20742206);MSTRG.1980.10(20740613:20743512);MSTRG.1980.11(20740613:20742170);MSTRG.1980.12(20740613:20742201);MSTRG.1980.1…
1	24315059	24315121	+	24315067	intergenic	MSTRG.2133	24305801-24315218	MSTRG.2133.1(24305801:24315218);MSTRG.2133.2(24305801:24315218);Zm00001d028152_T001(24310500:24314120);MSTRG.2133.4(24310612:24315140);MSTRG.2133.5(24310706:24315218)
1	24415307	24415307	+	24415307	intergenic	MSTRG.2138	24414871-24415757	MSTRG.2138.1(24414871:24415757)
1	24415610	24415628	+	24415610	intergenic	MSTRG.2138	24414871-24415757	MSTRG.2138.1(24414871:24415757)
1	24415655	24415655	+	24415655	intergenic	MSTRG.2138	24414871-24415757	MSTRG.2138.1(24414871:24415757)
1	24772604	24772604	+	24772604	intergenic	MSTRG.2151	24772165-24773003	MSTRG.2151.1(24772165:24773003)
1	25112427	25112447	+	25112429	intergenic	MSTRG.2162	25107834-25113761	MSTRG.2162.1(25107834:25113761);MSTRG.2162.2(25107834:25113702);MSTRG.2162.3(25107834:25113755);Zm00001d028169_T001(25107834:25110428);MSTRG.2162.5(25107836:25113702);MSTRG.2162.6(25107874:25113727);MSTRG.2162.7(25107940:25113674);MSTRG.2162.8(25107964:25112690);MSTRG.2162.9(25110902:25113704)
1	25112489	25112489	+	25112489	intergenic	MSTRG.2162	25107834-25113761	MSTRG.2162.1(25107834:25113761);MSTRG.2162.2(25107834:25113702);MSTRG.2162.3(25107834:25113755);Zm00001d028169_T001(25107834:25110428);MSTRG.2162.5(25107836:25113702);MSTRG.2162.6(25107874:25113727);MSTRG.2162.7(25107940:25113674);MSTRG.2162.8(25107964:25112690);MSTRG.2162.9(25110902:25113704)
1	25113494	25113494	+	25113494	intergenic	MSTRG.2162	25107834-25113761	MSTRG.2162.1(25107834:25113761);MSTRG.2162.2(25107834:25113702);MSTRG.2162.3(25107834:25113755);Zm00001d028169_T001(25107834:25110428);MSTRG.2162.5(25107836:25113702);MSTRG.2162.6(25107874:25113727);MSTRG.2162.7(25107940:25113674);MSTRG.2162.8(25107964:25112690);MSTRG.2162.9(25110902:25113704)
1	25113533	25113560	+	25113560	intergenic	MSTRG.2162	25107834-25113761	MSTRG.2162.1(25107834:25113761);MSTRG.2162.2(25107834:25113702);MSTRG.2162.3(25107834:25113755);Zm00001d028169_T001(25107834:25110428);MSTRG.2162.5(25107836:25113702);MSTRG.2162.6(25107874:25113727);MSTRG.2162.7(25107940:25113674);MSTRG.2162.8(25107964:25112690);MSTRG.2162.9(25110902:25113704)
1	25113594	25113600	+	25113596	intergenic	MSTRG.2162	25107834-25113761	MSTRG.2162.1(25107834:25113761);MSTRG.2162.2(25107834:25113702);MSTRG.2162.3(25107834:25113755);Zm00001d028169_T001(25107834:25110428);MSTRG.2162.5(25107836:25113702);MSTRG.2162.6(25107874:25113727);MSTRG.2162.7(25107940:25113674);MSTRG.2162.8(25107964:25112690);MSTRG.2162.9(25110902:25113704)
1	25113625	25113649	+	25113649	intergenic	MSTRG.2162	25107834-25113761	MSTRG.2162.1(25107834:25113761);MSTRG.2162.2(25107834:25113702);MSTRG.2162.3(25107834:25113755);Zm00001d028169_T001(25107834:25110428);MSTRG.2162.5(25107836:25113702);MSTRG.2162.6(25107874:25113727);MSTRG.2162.7(25107940:25113674);MSTRG.2162.8(25107964:25112690);MSTRG.2162.9(25110902:25113704)
1	25113692	25113704	+	25113692	intergenic	MSTRG.2162	25107834-25113761	MSTRG.2162.1(25107834:25113761);MSTRG.2162.2(25107834:25113702);MSTRG.2162.3(25107834:25113755);Zm00001d028169_T001(25107834:25110428);MSTRG.2162.5(25107836:25113702);MSTRG.2162.6(25107874:25113727);MSTRG.2162.7(25107940:25113674);MSTRG.2162.8(25107964:25112690);MSTRG.2162.9(25110902:25113704)
1	25113735	25113735	+	25113735	intergenic	MSTRG.2162	25107834-25113761	MSTRG.2162.1(25107834:25113761);MSTRG.2162.2(25107834:25113702);MSTRG.2162.3(25107834:25113755);Zm00001d028169_T001(25107834:25110428);MSTRG.2162.5(25107836:25113702);MSTRG.2162.6(25107874:25113727);MSTRG.2162.7(25107940:25113674);MSTRG.2162.8(25107964:25112690);MSTRG.2162.9(25110902:25113704)
1	25547722	25547722	+	25547722	intergenic	MSTRG.2177	25545912-25566248	MSTRG.2177.1(25545912:25566248);MSTRG.2177.2(25552349:25553251)
1	26874838	26874838	+	26874838	intergenic	MSTRG.2243	26874031-26883771	MSTRG.2243.1(26874031:26883771);MSTRG.2243.2(26874137:26883733)
1	26900064	26900107	+	26900084	intergenic	MSTRG.2245	26887427-26900363	MSTRG.2245.1(26887427:26900363)
1	26900168	26900168	+	26900168	intergenic	MSTRG.2245	26887427-26900363	MSTRG.2245.1(26887427:26900363)
1	26900195	26900217	+	26900217	intergenic	MSTRG.2245	26887427-26900363	MSTRG.2245.1(26887427:26900363)
1	27413285	27413285	+	27413285	intergenic	MSTRG.2273	27412800-27419672	MSTRG.2273.1(27412800:27419672)
1	27822115	27822132	+	27822132	intergenic	MSTRG.2290	27821877-27823637	MSTRG.2290.1(27821877:27823637)
1	27822224	27822238	+	27822224	intergenic	MSTRG.2290	27821877-27823637	MSTRG.2290.1(27821877:27823637)
1	27822575	27822580	+	27822580	intergenic	MSTRG.2290	27821877-27823637	MSTRG.2290.1(27821877:27823637)
1	27822623	27822623	+	27822623	intergenic	MSTRG.2290	27821877-27823637	MSTRG.2290.1(27821877:27823637)
1	27823116	27823116	+	27823116	intergenic	MSTRG.2290	27821877-27823637	MSTRG.2290.1(27821877:27823637)
1	28107150	28107303	+	28107245	intergenic	MSTRG.2306	28103034-28110810	Zm00001d028257_T002(28103034:28104556);Zm00001d028257_T001(28103034:28103980);Zm00001d028257_T004(28103053:28104556);Zm00001d028257_T003(28103053:28103980);MSTRG.2306.5(28103066:28110810)
1	28109895	28109895	+	28109895	intergenic	MSTRG.2306	28103034-28110810	Zm00001d028257_T002(28103034:28104556);Zm00001d028257_T001(28103034:28103980);Zm00001d028257_T004(28103053:28104556);Zm00001d028257_T003(28103053:28103980);MSTRG.2306.5(28103066:28110810)
1	29240635	29240661	+	29240659	intergenic	MSTRG.2351	29239353-29245030	MSTRG.2351.1(29239353:29245030);MSTRG.2351.2(29239353:29240869);MSTRG.2351.3(29239436:29245030);MSTRG.2351.4(29239480:29240710);MSTRG.2351.5(29239503:29244986);MSTRG.2351.6(29239513:29240752);MSTRG.2351.7(29239513:29240752);MSTRG.2351.8(29239546:29240734)
1	29786885	29786903	+	29786903	intergenic	MSTRG.2374	29785450-29788053	MSTRG.2374.1(29785450:29788053)
1	30026321	30026321	+	30026321	intergenic	MSTRG.2385	30025524-30033854	MSTRG.2385.1(30025524:30033854);MSTRG.2385.2(30025585:30033694);MSTRG.2385.3(30026155:30030732);MSTRG.2385.4(30026389:30033496)
1	30030714	30030714	+	30030714	intergenic	MSTRG.2385	30025524-30033854	MSTRG.2385.1(30025524:30033854);MSTRG.2385.2(30025585:30033694);MSTRG.2385.3(30026155:30030732);MSTRG.2385.4(30026389:30033496)
1	30031723	30031723	+	30031723	intergenic	MSTRG.2385	30025524-30033854	MSTRG.2385.1(30025524:30033854);MSTRG.2385.2(30025585:30033694);MSTRG.2385.3(30026155:30030732);MSTRG.2385.4(30026389:30033496)
1	30033097	30033097	+	30033097	intergenic	MSTRG.2385	30025524-30033854	MSTRG.2385.1(30025524:30033854);MSTRG.2385.2(30025585:30033694);MSTRG.2385.3(30026155:30030732);MSTRG.2385.4(30026389:30033496)
1	30033454	30033478	+	30033478	intergenic	MSTRG.2385	30025524-30033854	MSTRG.2385.1(30025524:30033854);MSTRG.2385.2(30025585:30033694);MSTRG.2385.3(30026155:30030732);MSTRG.2385.4(30026389:30033496)
1	30033550	30033550	+	30033550	intergenic	MSTRG.2385	30025524-30033854	MSTRG.2385.1(30025524:30033854);MSTRG.2385.2(30025585:30033694);MSTRG.2385.3(30026155:30030732);MSTRG.2385.4(30026389:30033496)
1	30033602	30033602	+	30033602	intergenic	MSTRG.2385	30025524-30033854	MSTRG.2385.1(30025524:30033854);MSTRG.2385.2(30025585:30033694);MSTRG.2385.3(30026155:30030732);MSTRG.2385.4(30026389:30033496)
1	30033644	30033745	+	30033645	intergenic	MSTRG.2385	30025524-30033854	MSTRG.2385.1(30025524:30033854);MSTRG.2385.2(30025585:30033694);MSTRG.2385.3(30026155:30030732);MSTRG.2385.4(30026389:30033496)
1	30033781	30033794	+	30033794	intergenic	MSTRG.2385	30025524-30033854	MSTRG.2385.1(30025524:30033854);MSTRG.2385.2(30025585:30033694);MSTRG.2385.3(30026155:30030732);MSTRG.2385.4(30026389:30033496)
1	30033833	30033852	+	30033850	intergenic	MSTRG.2385	30025524-30033854	MSTRG.2385.1(30025524:30033854);MSTRG.2385.2(30025585:30033694);MSTRG.2385.3(30026155:30030732);MSTRG.2385.4(30026389:30033496)
1	32139366	32139366	+	32139366	intergenic	MSTRG.2456	32137634-32143096	MSTRG.2456.1(32137634:32143096);Zm00001d028362_T001(32137771:32138313)
1	32142707	32142707	+	32142707	intergenic	MSTRG.2456	32137634-32143096	MSTRG.2456.1(32137634:32143096);Zm00001d028362_T001(32137771:32138313)
1	32142735	32142757	+	32142757	intergenic	MSTRG.2456	32137634-32143096	MSTRG.2456.1(32137634:32143096);Zm00001d028362_T001(32137771:32138313)
1	32142979	32143028	+	32142995	intergenic	MSTRG.2456	32137634-32143096	MSTRG.2456.1(32137634:32143096);Zm00001d028362_T001(32137771:32138313)
1	32149277	32149277	+	32149277	intergenic	MSTRG.2460	32148345-32150884	MSTRG.2460.1(32148345:32150884)
1	32360447	32360518	+	32360487	intergenic	MSTRG.2469	32288825-32367026	MSTRG.2469.1(32288825:32367026);Zm00001d028370_T001(32363713:32367026)
1	32360695	32360695	+	32360695	intergenic	MSTRG.2469	32288825-32367026	MSTRG.2469.1(32288825:32367026);Zm00001d028370_T001(32363713:32367026)
1	32360724	32360724	+	32360724	intergenic	MSTRG.2469	32288825-32367026	MSTRG.2469.1(32288825:32367026);Zm00001d028370_T001(32363713:32367026)
1	32616641	32616737	+	32616682	intergenic	MSTRG.2489	32606648-32616916	Zm00001d028377_T001(32606648:32607667);MSTRG.2489.2(32606718:32616916)
1	32616765	32616774	+	32616774	intergenic	MSTRG.2489	32606648-32616916	Zm00001d028377_T001(32606648:32607667);MSTRG.2489.2(32606718:32616916)
1	32616816	32616816	+	32616816	intergenic	MSTRG.2489	32606648-32616916	Zm00001d028377_T001(32606648:32607667);MSTRG.2489.2(32606718:32616916)
1	32692372	32692402	+	32692402	intergenic	MSTRG.2491	32678385-32692420	Zm00001d028380_T002(32678385:32692019);Zm00001d028380_T003(32678385:32692019);Zm00001d028380_T001(32678385:32691989);MSTRG.2491.4(32679496:32692420);MSTRG.2491.5(32679514:32692368);MSTRG.2491.6(32679585:32692378);MSTRG.2491.7(32679630:32692402);Zm00001d028380_T004(32680023:32691961);Zm00001d028380_T007(32680042:32691989);Zm00001d028380_T006(32680042:32691988);Zm00001d028380_T005(32680042:32691983…
1	34152788	34152795	+	34152795	intergenic	MSTRG.2560	34144550-34152821	MSTRG.2560.1(34144550:34152821);MSTRG.2560.2(34144566:34152759);Zm00001d028415_T001(34144566:34149917);Zm00001d028415_T002(34144640:34150075);Zm00001d028415_T003(34144641:34149371);Zm00001d028415_T004(34144644:34150213);Zm00001d028415_T005(34144667:34150213);MSTRG.2560.8(34144701:34152680);MSTRG.2560.9(34144705:34149334);MSTRG.2560.10(34144707:34149346)
1	34511339	34511339	+	34511339	intergenic	MSTRG.2570	34510502-34511515	MSTRG.2570.1(34510502:34511515)
1	35298890	35298890	+	35298890	intergenic	MSTRG.2611	35277401-35359109	MSTRG.2611.1(35277401:35359109)
1	35375168	35375168	+	35375168	intergenic	MSTRG.2613	35373007-35375291	MSTRG.2613.1(35373007:35375291)
1	35493273	35493273	+	35493273	intergenic	MSTRG.2620;MSTRG.2621	35472835-35534908;35492839-35494119	MSTRG.2620.1(35472835:35534908);MSTRG.2621.1(35492839:35494119)
1	35493338	35493338	+	35493338	intergenic	MSTRG.2620;MSTRG.2621	35472835-35534908;35492839-35494119	MSTRG.2620.1(35472835:35534908);MSTRG.2621.1(35492839:35494119)
1	35493381	35493381	+	35493381	intergenic	MSTRG.2620;MSTRG.2621	35472835-35534908;35492839-35494119	MSTRG.2620.1(35472835:35534908);MSTRG.2621.1(35492839:35494119)
1	35493406	35493406	+	35493406	intergenic	MSTRG.2620;MSTRG.2621	35472835-35534908;35492839-35494119	MSTRG.2620.1(35472835:35534908);MSTRG.2621.1(35492839:35494119)
1	35493856	35493856	+	35493856	intergenic	MSTRG.2620;MSTRG.2621	35472835-35534908;35492839-35494119	MSTRG.2620.1(35472835:35534908);MSTRG.2621.1(35492839:35494119)
1	35493904	35493915	+	35493905	intergenic	MSTRG.2620;MSTRG.2621	35472835-35534908;35492839-35494119	MSTRG.2620.1(35472835:35534908);MSTRG.2621.1(35492839:35494119)
1	35493977	35494000	+	35494000	intergenic	MSTRG.2620;MSTRG.2621	35472835-35534908;35492839-35494119	MSTRG.2620.1(35472835:35534908);MSTRG.2621.1(35492839:35494119)
1	36047874	36047892	+	36047874	intergenic	MSTRG.2647	36041162-36047906	Zm00001d028473_T001(36041162:36047534);MSTRG.2647.2(36041266:36047864);MSTRG.2647.3(36041691:36047906)
1	36217893	36217893	+	36217893	intergenic	MSTRG.2654	36177222-36218230	MSTRG.2654.1(36177222:36218230);Zm00001d028475_T001(36211949:36215963);MSTRG.2654.3(36212146:36216035);Zm00001d028475_T002(36212146:36216035)
1	38258085	38258085	+	38258085	intergenic	MSTRG.2727	38255319-38258541	MSTRG.2727.1(38255319:38258541)
1	38583716	38583716	+	38583716	intergenic	MSTRG.2742	38581699-38583917	MSTRG.2742.1(38581699:38583917)
1	39105646	39105646	+	39105646	intergenic	MSTRG.2773	38975256-39215147	MSTRG.2773.1(38975256:39086563);MSTRG.2773.2(38997187:39086501);MSTRG.2773.3(38997194:39086528);MSTRG.2773.4(38997227:39086204);MSTRG.2773.5(38997227:39086204);MSTRG.2773.6(38997227:39086528);MSTRG.2773.7(38997242:39214954);MSTRG.2773.8(38997242:39086204);MSTRG.2773.9(38997242:39086503);MSTRG.2773.10(38997242:39215147);MSTRG.2773.11(38997278:39086538);MSTRG.2773.12(38997326:39086537);MSTRG.2773.1…
1	40104462	40104478	+	40104466	intergenic	MSTRG.2830	40103872-40105918	MSTRG.2830.1(40103872:40105918);MSTRG.2830.2(40104102:40105825)
1	40104531	40104531	+	40104531	intergenic	MSTRG.2830	40103872-40105918	MSTRG.2830.1(40103872:40105918);MSTRG.2830.2(40104102:40105825)
1	40104893	40104893	+	40104893	intergenic	MSTRG.2830	40103872-40105918	MSTRG.2830.1(40103872:40105918);MSTRG.2830.2(40104102:40105825)
1	40105436	40105436	+	40105436	intergenic	MSTRG.2830	40103872-40105918	MSTRG.2830.1(40103872:40105918);MSTRG.2830.2(40104102:40105825)
1	40105671	40105685	+	40105685	intergenic	MSTRG.2830	40103872-40105918	MSTRG.2830.1(40103872:40105918);MSTRG.2830.2(40104102:40105825)
1	40105734	40105830	+	40105764	intergenic	MSTRG.2830	40103872-40105918	MSTRG.2830.1(40103872:40105918);MSTRG.2830.2(40104102:40105825)
1	40788210	40788210	+	40788210	intergenic	MSTRG.2865	40787645-40790481	MSTRG.2865.1(40787645:40790481)
1	41699035	41699054	+	41699035	intergenic	MSTRG.2898	41681231-41727697	MSTRG.2898.1(41681231:41699431);MSTRG.2898.2(41696222:41699432);MSTRG.2898.3(41696257:41727697);MSTRG.2898.4(41696257:41699420);MSTRG.2898.5(41696883:41699420);MSTRG.2898.6(41696883:41699381);Zm00001d028643_T001(41696883:41698484)
1	41699161	41699191	+	41699161	intergenic	MSTRG.2898	41681231-41727697	MSTRG.2898.1(41681231:41699431);MSTRG.2898.2(41696222:41699432);MSTRG.2898.3(41696257:41727697);MSTRG.2898.4(41696257:41699420);MSTRG.2898.5(41696883:41699420);MSTRG.2898.6(41696883:41699381);Zm00001d028643_T001(41696883:41698484)
1	41699253	41699253	+	41699253	intergenic	MSTRG.2898	41681231-41727697	MSTRG.2898.1(41681231:41699431);MSTRG.2898.2(41696222:41699432);MSTRG.2898.3(41696257:41727697);MSTRG.2898.4(41696257:41699420);MSTRG.2898.5(41696883:41699420);MSTRG.2898.6(41696883:41699381);Zm00001d028643_T001(41696883:41698484)
1	41699349	41699381	+	41699379	intergenic	MSTRG.2898	41681231-41727697	MSTRG.2898.1(41681231:41699431);MSTRG.2898.2(41696222:41699432);MSTRG.2898.3(41696257:41727697);MSTRG.2898.4(41696257:41699420);MSTRG.2898.5(41696883:41699420);MSTRG.2898.6(41696883:41699381);Zm00001d028643_T001(41696883:41698484)
1	41799941	41799947	+	41799947	intergenic	MSTRG.2909	41798952-41799973	MSTRG.2909.1(41798952:41799973)
1	43084386	43084402	+	43084402	intergenic	MSTRG.2963	43080647-43088818	MSTRG.2963.1(43080647:43088818);Zm00001d028686_T001(43080647:43083202)
1	43084487	43084489	+	43084487	intergenic	MSTRG.2963	43080647-43088818	MSTRG.2963.1(43080647:43088818);Zm00001d028686_T001(43080647:43083202)
1	43293741	43293741	+	43293741	intergenic	MSTRG.2968	43286729-43354912	MSTRG.2968.1(43286729:43354912)
1	43351829	43351829	+	43351829	intergenic	MSTRG.2968	43286729-43354912	MSTRG.2968.1(43286729:43354912)
1	43351868	43351878	+	43351868	intergenic	MSTRG.2968	43286729-43354912	MSTRG.2968.1(43286729:43354912)
1	43727358	43727406	+	43727391	intergenic	MSTRG.2998	43725600-43727692	MSTRG.2998.1(43725600:43727692);MSTRG.2998.2(43725600:43727524);Zm00001d028705_T001(43725600:43726910)
1	43727466	43727466	+	43727466	intergenic	MSTRG.2998	43725600-43727692	MSTRG.2998.1(43725600:43727692);MSTRG.2998.2(43725600:43727524);Zm00001d028705_T001(43725600:43726910)
1	43727492	43727517	+	43727517	intergenic	MSTRG.2998	43725600-43727692	MSTRG.2998.1(43725600:43727692);MSTRG.2998.2(43725600:43727524);Zm00001d028705_T001(43725600:43726910)
1	44731156	44731156	+	44731156	intergenic	MSTRG.3046	44721407-44732717	MSTRG.3046.1(44721407:44732717);MSTRG.3046.2(44721407:44732502);Zm00001d028736_T001(44721407:44722183)
1	44732205	44732205	+	44732205	intergenic	MSTRG.3046	44721407-44732717	MSTRG.3046.1(44721407:44732717);MSTRG.3046.2(44721407:44732502);Zm00001d028736_T001(44721407:44722183)
1	44732267	44732285	+	44732267	intergenic	MSTRG.3046	44721407-44732717	MSTRG.3046.1(44721407:44732717);MSTRG.3046.2(44721407:44732502);Zm00001d028736_T001(44721407:44722183)
1	44732353	44732372	+	44732372	intergenic	MSTRG.3046	44721407-44732717	MSTRG.3046.1(44721407:44732717);MSTRG.3046.2(44721407:44732502);Zm00001d028736_T001(44721407:44722183)
1	44732416	44732453	+	44732444	intergenic	MSTRG.3046	44721407-44732717	MSTRG.3046.1(44721407:44732717);MSTRG.3046.2(44721407:44732502);Zm00001d028736_T001(44721407:44722183)
1	44732489	44732521	+	44732509	intergenic	MSTRG.3046	44721407-44732717	MSTRG.3046.1(44721407:44732717);MSTRG.3046.2(44721407:44732502);Zm00001d028736_T001(44721407:44722183)
1	44732567	44732589	+	44732567	intergenic	MSTRG.3046	44721407-44732717	MSTRG.3046.1(44721407:44732717);MSTRG.3046.2(44721407:44732502);Zm00001d028736_T001(44721407:44722183)
1	45982852	45982932	+	45982892	intergenic	MSTRG.3096	45981264-45983255	MSTRG.3096.1(45981264:45983255);Zm00001d028768_T001(45981264:45982037)
1	45983210	45983210	+	45983210	intergenic	MSTRG.3096	45981264-45983255	MSTRG.3096.1(45981264:45983255);Zm00001d028768_T001(45981264:45982037)
1	46174912	46174912	+	46174912	intergenic	MSTRG.3111	46173475-46175021	MSTRG.3111.1(46173475:46175021)
1	46499634	46499645	+	46499645	intergenic	MSTRG.3137	46498385-46499687	MSTRG.3137.1(46498385:46499687)
1	46734565	46734575	+	46734565	intergenic	MSTRG.3147	46732004-46734847	MSTRG.3147.1(46732004:46734847);Zm00001d028799_T001(46732004:46733203);MSTRG.3147.3(46732889:46734799)
1	46734619	46734631	+	46734631	intergenic	MSTRG.3147	46732004-46734847	MSTRG.3147.1(46732004:46734847);Zm00001d028799_T001(46732004:46733203);MSTRG.3147.3(46732889:46734799)
1	46734666	46734666	+	46734666	intergenic	MSTRG.3147	46732004-46734847	MSTRG.3147.1(46732004:46734847);Zm00001d028799_T001(46732004:46733203);MSTRG.3147.3(46732889:46734799)
1	46734710	46734799	+	46734732	intergenic	MSTRG.3147	46732004-46734847	MSTRG.3147.1(46732004:46734847);Zm00001d028799_T001(46732004:46733203);MSTRG.3147.3(46732889:46734799)
1	46734833	46734833	+	46734833	intergenic	MSTRG.3147	46732004-46734847	MSTRG.3147.1(46732004:46734847);Zm00001d028799_T001(46732004:46733203);MSTRG.3147.3(46732889:46734799)
1	46956885	46956885	+	46956885	intergenic	MSTRG.3156	46950981-46965810	MSTRG.3156.1(46950981:46965810)
1	46956939	46956994	+	46956967	intergenic	MSTRG.3156	46950981-46965810	MSTRG.3156.1(46950981:46965810)
1	46960681	46960681	+	46960681	intergenic	MSTRG.3156	46950981-46965810	MSTRG.3156.1(46950981:46965810)
1	46961256	46961256	+	46961256	intergenic	MSTRG.3156	46950981-46965810	MSTRG.3156.1(46950981:46965810)
1	46963694	46963694	+	46963694	intergenic	MSTRG.3156	46950981-46965810	MSTRG.3156.1(46950981:46965810)
1	51079384	51079384	+	51079384	intergenic	MSTRG.3299	51076671-51160483	MSTRG.3299.1(51076671:51160483);MSTRG.3299.2(51076671:51160381);MSTRG.3299.3(51076671:51133197);Zm00001d028915_T002(51076671:51130142);Zm00001d028915_T001(51076671:51130142);Zm00001d028915_T003(51076671:51130142);Zm00001d028915_T004(51076693:51130137);MSTRG.3299.8(51076702:51160449);Zm00001d028915_T005(51076702:51130142);Zm00001d028915_T006(51076736:51101541);Zm00001d028915_T007(51076738:51101546…
1	51095023	51095023	+	51095023	intergenic	MSTRG.3299	51076671-51160483	MSTRG.3299.1(51076671:51160483);MSTRG.3299.2(51076671:51160381);MSTRG.3299.3(51076671:51133197);Zm00001d028915_T002(51076671:51130142);Zm00001d028915_T001(51076671:51130142);Zm00001d028915_T003(51076671:51130142);Zm00001d028915_T004(51076693:51130137);MSTRG.3299.8(51076702:51160449);Zm00001d028915_T005(51076702:51130142);Zm00001d028915_T006(51076736:51101541);Zm00001d028915_T007(51076738:51101546…
1	51095144	51095144	+	51095144	intergenic	MSTRG.3299	51076671-51160483	MSTRG.3299.1(51076671:51160483);MSTRG.3299.2(51076671:51160381);MSTRG.3299.3(51076671:51133197);Zm00001d028915_T002(51076671:51130142);Zm00001d028915_T001(51076671:51130142);Zm00001d028915_T003(51076671:51130142);Zm00001d028915_T004(51076693:51130137);MSTRG.3299.8(51076702:51160449);Zm00001d028915_T005(51076702:51130142);Zm00001d028915_T006(51076736:51101541);Zm00001d028915_T007(51076738:51101546…
1	51362955	51362971	+	51362971	intergenic	MSTRG.3305	51361781-51363019	MSTRG.3305.1(51361781:51363019);Zm00001d028916_T001(51361873:51362499)
1	51363003	51363007	+	51363007	intergenic	MSTRG.3305	51361781-51363019	MSTRG.3305.1(51361781:51363019);Zm00001d028916_T001(51361873:51362499)
1	52165987	52165987	+	52165987	intergenic	MSTRG.3337	52162848-52167125	MSTRG.3337.1(52162848:52167125);Zm00001d028935_T001(52162848:52164968)
1	52166048	52166048	+	52166048	intergenic	MSTRG.3337	52162848-52167125	MSTRG.3337.1(52162848:52167125);Zm00001d028935_T001(52162848:52164968)
1	52166083	52166083	+	52166083	intergenic	MSTRG.3337	52162848-52167125	MSTRG.3337.1(52162848:52167125);Zm00001d028935_T001(52162848:52164968)
1	52524012	52524012	+	52524012	intergenic	MSTRG.3349	52459541-52587253	MSTRG.3349.1(52459541:52523410);Zm00001d028946_T001(52499430:52509398);MSTRG.3349.3(52499524:52587253);Zm00001d028948_T001(52518690:52523101)
1	52524387	52524387	+	52524387	intergenic	MSTRG.3349	52459541-52587253	MSTRG.3349.1(52459541:52523410);Zm00001d028946_T001(52499430:52509398);MSTRG.3349.3(52499524:52587253);Zm00001d028948_T001(52518690:52523101)
1	52524556	52524556	+	52524556	intergenic	MSTRG.3349	52459541-52587253	MSTRG.3349.1(52459541:52523410);Zm00001d028946_T001(52499430:52509398);MSTRG.3349.3(52499524:52587253);Zm00001d028948_T001(52518690:52523101)
1	53310183	53310186	+	53310186	intergenic	MSTRG.3396	53309064-53310916	MSTRG.3396.1(53309064:53310916);Zm00001d028973_T001(53309064:53309600)
1	53394386	53394412	+	53394410	intergenic	MSTRG.3400	53393414-53396436	MSTRG.3400.1(53393414:53396436)
1	54757126	54757162	+	54757160	intergenic	MSTRG.3440	54753176-54757397	Zm00001d029010_T001(54753176:54756605);MSTRG.3440.2(54753371:54757338);MSTRG.3440.3(54753371:54757322);MSTRG.3440.4(54753371:54757328);MSTRG.3440.5(54753371:54757311);MSTRG.3440.6(54753371:54757327);MSTRG.3440.7(54753371:54757305);MSTRG.3440.8(54753371:54756792);MSTRG.3440.9(54753371:54757397);MSTRG.3440.10(54753371:54757322);MSTRG.3440.11(54753371:54756792);MSTRG.3440.12(54753371:54757305);MSTRG…
1	54757280	54757280	+	54757280	intergenic	MSTRG.3440	54753176-54757397	Zm00001d029010_T001(54753176:54756605);MSTRG.3440.2(54753371:54757338);MSTRG.3440.3(54753371:54757322);MSTRG.3440.4(54753371:54757328);MSTRG.3440.5(54753371:54757311);MSTRG.3440.6(54753371:54757327);MSTRG.3440.7(54753371:54757305);MSTRG.3440.8(54753371:54756792);MSTRG.3440.9(54753371:54757397);MSTRG.3440.10(54753371:54757322);MSTRG.3440.11(54753371:54756792);MSTRG.3440.12(54753371:54757305);MSTRG…
1	55374651	55374651	+	55374651	intergenic	MSTRG.3469	55373231-55377783	MSTRG.3469.1(55373231:55377783);MSTRG.3469.2(55373940:55374681)
1	55374709	55374753	+	55374745	intergenic	MSTRG.3469	55373231-55377783	MSTRG.3469.1(55373231:55377783);MSTRG.3469.2(55373940:55374681)
1	58017123	58017123	+	58017123	intergenic	MSTRG.3575	58016590-58019187	MSTRG.3575.1(58016590:58019187);MSTRG.3575.2(58016590:58019187);Zm00001d029100_T001(58018569:58018889)
1	60187710	60187750	+	60187710	intergenic	MSTRG.3629	60182622-60188193	MSTRG.3629.1(60182622:60188193);MSTRG.3629.2(60182622:60188171);Zm00001d029138_T001(60182624:60186722);Zm00001d029138_T002(60182624:60186722);MSTRG.3629.5(60182625:60188147);MSTRG.3629.6(60182670:60188171);MSTRG.3629.7(60182685:60188178)
1	60187813	60187885	+	60187849	intergenic	MSTRG.3629	60182622-60188193	MSTRG.3629.1(60182622:60188193);MSTRG.3629.2(60182622:60188171);Zm00001d029138_T001(60182624:60186722);Zm00001d029138_T002(60182624:60186722);MSTRG.3629.5(60182625:60188147);MSTRG.3629.6(60182670:60188171);MSTRG.3629.7(60182685:60188178)
1	60187912	60187912	+	60187912	intergenic	MSTRG.3629	60182622-60188193	MSTRG.3629.1(60182622:60188193);MSTRG.3629.2(60182622:60188171);Zm00001d029138_T001(60182624:60186722);Zm00001d029138_T002(60182624:60186722);MSTRG.3629.5(60182625:60188147);MSTRG.3629.6(60182670:60188171);MSTRG.3629.7(60182685:60188178)
1	60188068	60188068	+	60188068	intergenic	MSTRG.3629	60182622-60188193	MSTRG.3629.1(60182622:60188193);MSTRG.3629.2(60182622:60188171);Zm00001d029138_T001(60182624:60186722);Zm00001d029138_T002(60182624:60186722);MSTRG.3629.5(60182625:60188147);MSTRG.3629.6(60182670:60188171);MSTRG.3629.7(60182685:60188178)
1	60633349	60633349	+	60633349	intergenic	MSTRG.3649	60633050-60634602	MSTRG.3649.1(60633050:60634602)
1	60634383	60634411	+	60634383	intergenic	MSTRG.3649	60633050-60634602	MSTRG.3649.1(60633050:60634602)
1	60634482	60634490	+	60634482	intergenic	MSTRG.3649	60633050-60634602	MSTRG.3649.1(60633050:60634602)
1	60889901	60889901	+	60889901	intergenic	MSTRG.3657	60862510-60934311	Zm00001d029161_T001(60862510:60868940);MSTRG.3657.2(60864453:60934278);Zm00001d029170_T001(60930751:60934137);Zm00001d029170_T002(60930751:60934311);Zm00001d029170_T003(60930849:60934278);Zm00001d029170_T005(60930917:60934277);Zm00001d029170_T004(60930917:60934137);MSTRG.3657.8(60931122:60934258);Zm00001d029170_T006(60932394:60934277);Zm00001d029170_T007(60932915:60934258)
1	60997079	60997079	+	60997079	intergenic	MSTRG.3672;MSTRG.3674	60973105-61045956;60997006-60999942	MSTRG.3672.1(60973105:61045956);MSTRG.3672.2(61025483:61045946);MSTRG.3672.3(61025483:61045942);Zm00001d029177_T001(61041496:61045956);Zm00001d029177_T002(61041560:61045936);Zm00001d029177_T003(61041573:61045946);MSTRG.3674.1(60997006:60999942)
1	61533156	61533213	+	61533188	intergenic	MSTRG.3688;MSTRG.3690	61523954-61570528;61531865-61541686	MSTRG.3688.1(61523954:61570528);Zm00001d029188_T005(61566224:61570528);Zm00001d029188_T002(61566224:61570356);Zm00001d029188_T004(61566224:61570438);Zm00001d029188_T007(61566224:61570528);Zm00001d029188_T006(61566224:61570528);Zm00001d029188_T003(61566224:61570367);Zm00001d029188_T001(61566224:61570340);MSTRG.3688.9(61566227:61570464);Zm00001d029188_T008(61566227:61567773);Zm00001d029188_T009(615…
1	61898395	61898396	+	61898396	intergenic	MSTRG.3709	61897651-61901423	MSTRG.3709.1(61897651:61901423);MSTRG.3709.2(61897724:61901310);MSTRG.3709.3(61897755:61901310);MSTRG.3709.4(61897771:61901310);MSTRG.3709.5(61897773:61901310);MSTRG.3709.6(61897794:61901310);MSTRG.3709.7(61897794:61901310);MSTRG.3709.8(61897808:61901310);MSTRG.3709.9(61897814:61901310);MSTRG.3709.10(61897842:61901310);MSTRG.3709.11(61897862:61901310);MSTRG.3709.12(61898636:61901310);MSTRG.3709.1…
1	62214845	62214867	+	62214867	intergenic	MSTRG.3721	62160049-62220483	MSTRG.3721.1(62160049:62220483);MSTRG.3721.2(62216957:62220468);MSTRG.3721.3(62217017:62220466)
1	62214899	62214899	+	62214899	intergenic	MSTRG.3721	62160049-62220483	MSTRG.3721.1(62160049:62220483);MSTRG.3721.2(62216957:62220468);MSTRG.3721.3(62217017:62220466)
1	62743820	62743820	+	62743820	intergenic	MSTRG.3749	62743309-62745240	MSTRG.3749.1(62743309:62745240)
1	63236500	63236500	+	63236500	intergenic	MSTRG.3761	63204270-63256151	MSTRG.3761.1(63204270:63256103);MSTRG.3761.2(63233422:63256151);MSTRG.3761.3(63250888:63256140);MSTRG.3761.4(63250998:63256151);MSTRG.3761.5(63251028:63256118)
1	66393792	66393792	+	66393792	intergenic	MSTRG.3901	66388200-66507895	Zm00001d029336_T003(66388200:66393059);Zm00001d029336_T002(66388200:66393059);Zm00001d029336_T004(66388200:66393060);Zm00001d029336_T005(66388200:66393060);Zm00001d029336_T006(66388251:66393060);MSTRG.3901.6(66388265:66507895);Zm00001d029336_T008(66388265:66393059);Zm00001d029336_T007(66388265:66392902);Zm00001d029336_T009(66388271:66392938);Zm00001d029336_T010(66388293:66393032);MSTRG.3901.11(66…
1	69625477	69625477	+	69625477	intergenic	MSTRG.4016	69619304-69625685	Zm00001d029416_T002(69619304:69624861);Zm00001d029416_T001(69619304:69624861);Zm00001d029416_T003(69619345:69624824);MSTRG.4016.4(69619356:69625685);Zm00001d029416_T004(69619356:69624806);Zm00001d029416_T005(69620403:69624804)
1	69625573	69625573	+	69625573	intergenic	MSTRG.4016	69619304-69625685	Zm00001d029416_T002(69619304:69624861);Zm00001d029416_T001(69619304:69624861);Zm00001d029416_T003(69619345:69624824);MSTRG.4016.4(69619356:69625685);Zm00001d029416_T004(69619356:69624806);Zm00001d029416_T005(69620403:69624804)
1	69625675	69625675	+	69625675	intergenic	MSTRG.4016	69619304-69625685	Zm00001d029416_T002(69619304:69624861);Zm00001d029416_T001(69619304:69624861);Zm00001d029416_T003(69619345:69624824);MSTRG.4016.4(69619356:69625685);Zm00001d029416_T004(69619356:69624806);Zm00001d029416_T005(69620403:69624804)
1	69749796	69749796	+	69749796	intergenic	MSTRG.4021	69743529-69750032	Zm00001d029419_T001(69743529:69747782);Zm00001d029419_T002(69743529:69747782);Zm00001d029419_T003(69743529:69747782);Zm00001d029419_T004(69743538:69747782);Zm00001d029419_T005(69743538:69747782);MSTRG.4021.6(69743680:69750032);Zm00001d029419_T006(69743680:69747731);Zm00001d029419_T007(69743680:69747781);Zm00001d029419_T008(69743732:69747735);Zm00001d029419_T009(69743903:69747599);Zm00001d029419_T…
1	69749905	69749905	+	69749905	intergenic	MSTRG.4021	69743529-69750032	Zm00001d029419_T001(69743529:69747782);Zm00001d029419_T002(69743529:69747782);Zm00001d029419_T003(69743529:69747782);Zm00001d029419_T004(69743538:69747782);Zm00001d029419_T005(69743538:69747782);MSTRG.4021.6(69743680:69750032);Zm00001d029419_T006(69743680:69747731);Zm00001d029419_T007(69743680:69747781);Zm00001d029419_T008(69743732:69747735);Zm00001d029419_T009(69743903:69747599);Zm00001d029419_T…
1	69749946	69749995	+	69749948	intergenic	MSTRG.4021	69743529-69750032	Zm00001d029419_T001(69743529:69747782);Zm00001d029419_T002(69743529:69747782);Zm00001d029419_T003(69743529:69747782);Zm00001d029419_T004(69743538:69747782);Zm00001d029419_T005(69743538:69747782);MSTRG.4021.6(69743680:69750032);Zm00001d029419_T006(69743680:69747731);Zm00001d029419_T007(69743680:69747781);Zm00001d029419_T008(69743732:69747735);Zm00001d029419_T009(69743903:69747599);Zm00001d029419_T…
1	70299859	70299936	+	70299926	intergenic	MSTRG.4047	70296509-70300898	MSTRG.4047.1(70296509:70300898);Zm00001d029435_T001(70296564:70298312)
1	70300398	70300499	+	70300451	intergenic	MSTRG.4047	70296509-70300898	MSTRG.4047.1(70296509:70300898);Zm00001d029435_T001(70296564:70298312)
1	71028440	71028440	+	71028440	intergenic	MSTRG.4070	71025951-71028496	MSTRG.4070.1(71025951:71028496);MSTRG.4070.2(71025951:71028492)
1	72010628	72010628	+	72010628	intergenic	MSTRG.4096	72010301-72010634	MSTRG.4096.1(72010301:72010634)
1	74790774	74790774	+	74790774	intergenic	MSTRG.4185	74787648-74790819	MSTRG.4185.1(74787648:74790819)
1	76056322	76056352	+	76056342	intergenic	MSTRG.4227	76055945-76056487	MSTRG.4227.1(76055945:76056487)
1	76056448	76056448	+	76056448	intergenic	MSTRG.4227	76055945-76056487	MSTRG.4227.1(76055945:76056487)
1	76526908	76526934	+	76526908	intergenic	MSTRG.4241	76518613-76542821	Zm00001d029563_T001(76518613:76526323);MSTRG.4241.2(76521443:76541814);Zm00001d022760_T001(76521443:76521692);MSTRG.4241.4(76521493:76527149);Zm00001d029563_T002(76521493:76526416);MSTRG.4241.6(76521494:76527200);MSTRG.4241.7(76521494:76527200);MSTRG.4241.8(76521528:76527054);MSTRG.4241.9(76521535:76527052);MSTRG.4241.10(76521556:76542821);MSTRG.4241.11(76521562:76527230);MSTRG.4241.12(76521562:7…
1	76527117	76527117	+	76527117	intergenic	MSTRG.4241	76518613-76542821	Zm00001d029563_T001(76518613:76526323);MSTRG.4241.2(76521443:76541814);Zm00001d022760_T001(76521443:76521692);MSTRG.4241.4(76521493:76527149);Zm00001d029563_T002(76521493:76526416);MSTRG.4241.6(76521494:76527200);MSTRG.4241.7(76521494:76527200);MSTRG.4241.8(76521528:76527054);MSTRG.4241.9(76521535:76527052);MSTRG.4241.10(76521556:76542821);MSTRG.4241.11(76521562:76527230);MSTRG.4241.12(76521562:7…
1	76607766	76607766	+	76607766	intergenic	MSTRG.4243	76597966-76612550	MSTRG.4243.1(76597966:76612550);MSTRG.4243.2(76598028:76608393)
1	76607940	76607957	+	76607940	intergenic	MSTRG.4243	76597966-76612550	MSTRG.4243.1(76597966:76612550);MSTRG.4243.2(76598028:76608393)
1	76607985	76607987	+	76607985	intergenic	MSTRG.4243	76597966-76612550	MSTRG.4243.1(76597966:76612550);MSTRG.4243.2(76598028:76608393)
1	76608018	76608154	+	76608110	intergenic	MSTRG.4243	76597966-76612550	MSTRG.4243.1(76597966:76612550);MSTRG.4243.2(76598028:76608393)
1	76610700	76610700	+	76610700	intergenic	MSTRG.4243	76597966-76612550	MSTRG.4243.1(76597966:76612550);MSTRG.4243.2(76598028:76608393)
1	77689242	77689242	+	77689242	intergenic	MSTRG.4271	77688591-77689335	MSTRG.4271.1(77688591:77689335);MSTRG.4271.2(77688672:77689322)
1	77689308	77689321	+	77689311	intergenic	MSTRG.4271	77688591-77689335	MSTRG.4271.1(77688591:77689335);MSTRG.4271.2(77688672:77689322)
1	82713742	82713742	+	82713742	intergenic	MSTRG.4447	82710805-82713927	MSTRG.4447.1(82710805:82713927)
1	83659830	83659883	+	83659863	intergenic	MSTRG.4484	83659121-83660230	MSTRG.4484.1(83659121:83660230)
1	85472342	85472342	+	85472342	intergenic	MSTRG.4538	85469536-85472749	MSTRG.4538.1(85469536:85472749)
1	85561038	85561038	+	85561038	intergenic	MSTRG.4545	85558744-85663640	MSTRG.4545.1(85558744:85653690);MSTRG.4545.2(85649746:85663640);MSTRG.4545.3(85649805:85653790)
1	85561165	85561165	+	85561165	intergenic	MSTRG.4545	85558744-85663640	MSTRG.4545.1(85558744:85653690);MSTRG.4545.2(85649746:85663640);MSTRG.4545.3(85649805:85653790)
1	85775731	85775757	+	85775738	intergenic	MSTRG.4548	85775079-85779548	MSTRG.4548.1(85775079:85779536);MSTRG.4548.2(85775079:85779532);MSTRG.4548.3(85775085:85779536);MSTRG.4548.4(85775094:85779532);MSTRG.4548.5(85775094:85779516);MSTRG.4548.6(85775094:85779513);MSTRG.4548.7(85775103:85779528);MSTRG.4548.8(85775112:85779528);MSTRG.4548.9(85775120:85779532);MSTRG.4548.10(85775120:85779528);MSTRG.4548.11(85775120:85779532);MSTRG.4548.12(85775120:85779528);MSTRG.4548.1…
1	85775915	85775915	+	85775915	intergenic	MSTRG.4548	85775079-85779548	MSTRG.4548.1(85775079:85779536);MSTRG.4548.2(85775079:85779532);MSTRG.4548.3(85775085:85779536);MSTRG.4548.4(85775094:85779532);MSTRG.4548.5(85775094:85779516);MSTRG.4548.6(85775094:85779513);MSTRG.4548.7(85775103:85779528);MSTRG.4548.8(85775112:85779528);MSTRG.4548.9(85775120:85779532);MSTRG.4548.10(85775120:85779528);MSTRG.4548.11(85775120:85779532);MSTRG.4548.12(85775120:85779528);MSTRG.4548.1…
1	88703764	88703787	+	88703777	intergenic	MSTRG.4633	88693303-88704313	MSTRG.4633.1(88693303:88704313);MSTRG.4633.2(88693331:88704177);MSTRG.4633.3(88693358:88704313);MSTRG.4633.4(88696531:88704160);Zm00001d029822_T001(88696531:88703297);MSTRG.4633.6(88697495:88704191);MSTRG.4633.7(88697501:88704191)
1	89363906	89363906	+	89363906	intergenic	MSTRG.4646	89355752-89363937	MSTRG.4646.1(89355752:89363937);MSTRG.4646.2(89355782:89363881);MSTRG.4646.3(89355788:89363843);MSTRG.4646.4(89355802:89363786);MSTRG.4646.5(89355810:89363881);MSTRG.4646.6(89355820:89363662);MSTRG.4646.7(89355830:89363687);MSTRG.4646.8(89355849:89363692);Zm00001d029833_T001(89356091:89363713)
1	90446079	90446079	+	90446079	intergenic	MSTRG.4687	90442534-90446292	MSTRG.4687.1(90442534:90446292)
1	97889857	97889885	+	97889885	intergenic	MSTRG.4864	97887877-97890592	MSTRG.4864.1(97887877:97890592);Zm00001d029991_T001(97887934:97889041)
1	97889953	97889953	+	97889953	intergenic	MSTRG.4864	97887877-97890592	MSTRG.4864.1(97887877:97890592);Zm00001d029991_T001(97887934:97889041)
1	97890332	97890332	+	97890332	intergenic	MSTRG.4864	97887877-97890592	MSTRG.4864.1(97887877:97890592);Zm00001d029991_T001(97887934:97889041)
1	101468439	101468669	+	101468561	intergenic	MSTRG.4931	101466317-101468630	MSTRG.4931.1(101466317:101468630);Zm00001d030040_T001(101466317:101468065)
1	102222400	102222446	+	102222420	intergenic	MSTRG.4940	102215687-102222621	MSTRG.4940.1(102215687:102222621);Zm00001d030051_T001(102215687:102221905);Zm00001d030051_T002(102215720:102221905);Zm00001d030051_T003(102215784:102216763);MSTRG.4940.5(102215789:102222599);MSTRG.4940.6(102215789:102222520);MSTRG.4940.7(102215789:102221905);Zm00001d030051_T005(102215789:102221289);MSTRG.4940.9(102215791:102222575);Zm00001d030051_T006(102215813:102216779);MSTRG.4940.11(102215820:…
1	102222478	102222555	+	102222499	intergenic	MSTRG.4940	102215687-102222621	MSTRG.4940.1(102215687:102222621);Zm00001d030051_T001(102215687:102221905);Zm00001d030051_T002(102215720:102221905);Zm00001d030051_T003(102215784:102216763);MSTRG.4940.5(102215789:102222599);MSTRG.4940.6(102215789:102222520);MSTRG.4940.7(102215789:102221905);Zm00001d030051_T005(102215789:102221289);MSTRG.4940.9(102215791:102222575);Zm00001d030051_T006(102215813:102216779);MSTRG.4940.11(102215820:…
1	103638211	103638222	+	103638222	intergenic	MSTRG.4971	103634381-103638304	MSTRG.4971.1(103634381:103638304);Zm00001d030074_T001(103634381:103637965)
1	104121979	104121991	+	104121984	intergenic	MSTRG.4975	104118773-104122287	MSTRG.4975.1(104118773:104122133);MSTRG.4975.2(104119711:104122287);MSTRG.4975.3(104119711:104122229);Zm00001d030080_T001(104119711:104120380);Zm00001d030080_T002(104119711:104120879);MSTRG.4975.6(104119755:104122229)
1	104122061	104122061	+	104122061	intergenic	MSTRG.4975	104118773-104122287	MSTRG.4975.1(104118773:104122133);MSTRG.4975.2(104119711:104122287);MSTRG.4975.3(104119711:104122229);Zm00001d030080_T001(104119711:104120380);Zm00001d030080_T002(104119711:104120879);MSTRG.4975.6(104119755:104122229)
1	104122086	104122086	+	104122086	intergenic	MSTRG.4975	104118773-104122287	MSTRG.4975.1(104118773:104122133);MSTRG.4975.2(104119711:104122287);MSTRG.4975.3(104119711:104122229);Zm00001d030080_T001(104119711:104120380);Zm00001d030080_T002(104119711:104120879);MSTRG.4975.6(104119755:104122229)
1	104122146	104122146	+	104122146	intergenic	MSTRG.4975	104118773-104122287	MSTRG.4975.1(104118773:104122133);MSTRG.4975.2(104119711:104122287);MSTRG.4975.3(104119711:104122229);Zm00001d030080_T001(104119711:104120380);Zm00001d030080_T002(104119711:104120879);MSTRG.4975.6(104119755:104122229)
1	104122221	104122221	+	104122221	intergenic	MSTRG.4975	104118773-104122287	MSTRG.4975.1(104118773:104122133);MSTRG.4975.2(104119711:104122287);MSTRG.4975.3(104119711:104122229);Zm00001d030080_T001(104119711:104120380);Zm00001d030080_T002(104119711:104120879);MSTRG.4975.6(104119755:104122229)
1	104424206	104424206	+	104424206	intergenic	MSTRG.4979	104416697-104446982	MSTRG.4979.1(104416697:104446982)
1	105700303	105700303	+	105700303	intergenic	MSTRG.5004	105700205-105702012	MSTRG.5004.1(105700205:105702012)
1	109553217	109553232	+	109553232	intergenic	MSTRG.5083	109550524-109553750	MSTRG.5083.1(109550524:109553750);MSTRG.5083.2(109550524:109553744);MSTRG.5083.3(109550568:109553690);MSTRG.5083.4(109550574:109553684)
1	113772708	113772708	+	113772708	intergenic	MSTRG.5152	113772486-113773078	MSTRG.5152.1(113772486:113773078)
1	113772764	113772764	+	113772764	intergenic	MSTRG.5152	113772486-113773078	MSTRG.5152.1(113772486:113773078)
1	113772793	113772793	+	113772793	intergenic	MSTRG.5152	113772486-113773078	MSTRG.5152.1(113772486:113773078)
1	116907791	116907807	+	116907791	intergenic	MSTRG.5200	116907308-116914404	MSTRG.5200.1(116907308:116914404)
1	119173202	119173202	+	119173202	intergenic	MSTRG.5244	119170510-119173253	MSTRG.5244.1(119170510:119173253);MSTRG.5244.2(119170528:119173249);MSTRG.5244.3(119170528:119173249);MSTRG.5244.4(119170528:119173249);MSTRG.5244.5(119170528:119173249);MSTRG.5244.6(119170528:119173249);MSTRG.5244.7(119170558:119173245);MSTRG.5244.8(119170558:119173253);MSTRG.5244.9(119170558:119173224);MSTRG.5244.10(119170558:119173242);MSTRG.5244.11(119170558:119173224);MSTRG.5244.12(119170559…
1	120789256	120789263	+	120789256	intergenic	MSTRG.5269	120787245-120813111	MSTRG.5269.1(120787245:120813111);MSTRG.5269.2(120787252:120812993);MSTRG.5269.3(120787272:120813111);MSTRG.5269.4(120787277:120813047);Zm00001d030301_T002(120802390:120812964);Zm00001d030301_T003(120802390:120812980);Zm00001d030301_T001(120802390:120812747)
1	121010343	121010343	+	121010343	intergenic	MSTRG.5273	121005913-121174236	MSTRG.5273.1(121005913:121008504);MSTRG.5273.2(121005952:121174236);MSTRG.5273.3(121006062:121007495);Zm00001d030304_T001(121172256:121174233);Zm00001d030304_T002(121172262:121174236)
1	121981294	121981326	+	121981312	intergenic	MSTRG.5291	121980723-121981496	MSTRG.5291.1(121980723:121981496)
1	121981387	121981387	+	121981387	intergenic	MSTRG.5291	121980723-121981496	MSTRG.5291.1(121980723:121981496)
1	126095336	126095366	+	126095366	intergenic	MSTRG.5344	126093183-126095499	Zm00001d030361_T001(126093183:126094591);MSTRG.5344.2(126093226:126095499)
1	126801383	126801383	+	126801383	intergenic	MSTRG.5360	126797519-126801544	Zm00001d030370_T001(126797519:126800598);MSTRG.5360.2(126797524:126801544);MSTRG.5360.3(126797524:126801544);MSTRG.5360.4(126797524:126801529);MSTRG.5360.5(126797527:126801540);MSTRG.5360.6(126797531:126801483);MSTRG.5360.7(126797535:126801523);MSTRG.5360.8(126797535:126801544);MSTRG.5360.9(126797556:126801483);MSTRG.5360.10(126797578:126801529)
1	143208089	143208089	+	143208089	intergenic	MSTRG.5547	143206498-143208207	MSTRG.5547.1(143206498:143208207);MSTRG.5547.2(143206502:143208207)
1	148200330	148200332	+	148200330	intergenic	MSTRG.5623	148162035-148202458	MSTRG.5623.1(148162035:148202458);MSTRG.5623.2(148162035:148190528);Zm00001d030609_T002(148162035:148190548);Zm00001d030609_T001(148162035:148163539);Zm00001d030609_T003(148162170:148176799);Zm00001d030609_T004(148162186:148190521);MSTRG.5623.7(148162208:148190489);MSTRG.5623.8(148162208:148190511);Zm00001d030609_T005(148162208:148190489);Zm00001d030609_T006(148162234:148190494);Zm00001d030609_T0…
1	148200362	148200374	+	148200362	intergenic	MSTRG.5623	148162035-148202458	MSTRG.5623.1(148162035:148202458);MSTRG.5623.2(148162035:148190528);Zm00001d030609_T002(148162035:148190548);Zm00001d030609_T001(148162035:148163539);Zm00001d030609_T003(148162170:148176799);Zm00001d030609_T004(148162186:148190521);MSTRG.5623.7(148162208:148190489);MSTRG.5623.8(148162208:148190511);Zm00001d030609_T005(148162208:148190489);Zm00001d030609_T006(148162234:148190494);Zm00001d030609_T0…
1	148836092	148836092	+	148836092	intergenic	MSTRG.5634;MSTRG.5639;MSTRG.5640	148752396-148900416;148822785-148909268;148833542-148837811	MSTRG.5634.1(148752396:148900416);MSTRG.5634.2(148784349:148807513);MSTRG.5634.3(148806103:148807521);MSTRG.5634.4(148806103:148807467);Zm00001d030617_T001(148806103:148807147);MSTRG.5639.1(148822785:148909268);MSTRG.5639.2(148822801:148909268);MSTRG.5640.1(148833542:148837811);MSTRG.5640.2(148833542:148837787);MSTRG.5640.3(148833596:148837810)
1	151888634	151888643	+	151888634	intergenic	MSTRG.5695	151887275-151891801	MSTRG.5695.1(151887275:151891801)
1	151888689	151888711	+	151888705	intergenic	MSTRG.5695	151887275-151891801	MSTRG.5695.1(151887275:151891801)
1	151888752	151888792	+	151888785	intergenic	MSTRG.5695	151887275-151891801	MSTRG.5695.1(151887275:151891801)
1	151888982	151888982	+	151888982	intergenic	MSTRG.5695	151887275-151891801	MSTRG.5695.1(151887275:151891801)
1	151891565	151891588	+	151891585	intergenic	MSTRG.5695	151887275-151891801	MSTRG.5695.1(151887275:151891801)
1	151891613	151891613	+	151891613	intergenic	MSTRG.5695	151887275-151891801	MSTRG.5695.1(151887275:151891801)
1	151908665	151908665	+	151908665	intergenic	MSTRG.5697	151907948-151908704	MSTRG.5697.1(151907948:151908704)
1	154822149	154822149	+	154822149	intergenic	MSTRG.5747	154821449-154823550	MSTRG.5747.1(154821449:154823550)
1	154823544	154823550	+	154823548	intergenic	MSTRG.5747	154821449-154823550	MSTRG.5747.1(154821449:154823550)
1	157517134	157517155	+	157517134	intergenic	MSTRG.5798	157497130-157517641	MSTRG.5798.1(157497130:157517636);Zm00001d030742_T001(157497130:157511072);Zm00001d030742_T002(157497130:157511072);MSTRG.5798.4(157497169:157517636);MSTRG.5798.5(157497216:157517198);MSTRG.5798.6(157497252:157517165);MSTRG.5798.7(157497255:157517159);MSTRG.5798.8(157497485:157517163);Zm00001d030742_T003(157497485:157511072);MSTRG.5798.10(157498276:157517641);MSTRG.5798.11(157500429:157517337);MS…
1	157568503	157568536	+	157568503	intergenic	MSTRG.5799;MSTRG.5801	157526232-157573243;157565572-157568832	MSTRG.5799.1(157526232:157528718);MSTRG.5799.2(157526241:157573243);MSTRG.5799.3(157526945:157528046);MSTRG.5799.4(157526945:157528711);MSTRG.5799.5(157526947:157528711);MSTRG.5801.1(157565572:157568832);MSTRG.5801.2(157565591:157568681);MSTRG.5801.3(157565629:157568760);MSTRG.5801.4(157565641:157568707);Zm00001d030744_T001(157566433:157567911)
1	157568635	157568638	+	157568635	intergenic	MSTRG.5799;MSTRG.5801	157526232-157573243;157565572-157568832	MSTRG.5799.1(157526232:157528718);MSTRG.5799.2(157526241:157573243);MSTRG.5799.3(157526945:157528046);MSTRG.5799.4(157526945:157528711);MSTRG.5799.5(157526947:157528711);MSTRG.5801.1(157565572:157568832);MSTRG.5801.2(157565591:157568681);MSTRG.5801.3(157565629:157568760);MSTRG.5801.4(157565641:157568707);Zm00001d030744_T001(157566433:157567911)
1	157568671	157568671	+	157568671	intergenic	MSTRG.5799;MSTRG.5801	157526232-157573243;157565572-157568832	MSTRG.5799.1(157526232:157528718);MSTRG.5799.2(157526241:157573243);MSTRG.5799.3(157526945:157528046);MSTRG.5799.4(157526945:157528711);MSTRG.5799.5(157526947:157528711);MSTRG.5801.1(157565572:157568832);MSTRG.5801.2(157565591:157568681);MSTRG.5801.3(157565629:157568760);MSTRG.5801.4(157565641:157568707);Zm00001d030744_T001(157566433:157567911)
1	158946340	158946370	+	158946369	intergenic	MSTRG.5829	158943219-158946534	MSTRG.5829.1(158943219:158946534)
1	158946401	158946401	+	158946401	intergenic	MSTRG.5829	158943219-158946534	MSTRG.5829.1(158943219:158946534)
1	158946427	158946553	+	158946485	intergenic	MSTRG.5829	158943219-158946534	MSTRG.5829.1(158943219:158946534)
1	164222418	164222418	+	164222418	intergenic	MSTRG.5942	164222011-164225845	MSTRG.5942.1(164222011:164225845)
1	165746197	165746197	+	165746197	intergenic	MSTRG.5961	165741227-165782235	MSTRG.5961.1(165741227:165782235);Zm00001d030888_T001(165741227:165745488);Zm00001d030888_T002(165744515:165745475)
1	166813217	166813228	+	166813224	intergenic	MSTRG.5997	166811332-166813599	MSTRG.5997.1(166811332:166813599);Zm00001d030911_T001(166811332:166812308)
1	167677365	167677365	+	167677365	intergenic	MSTRG.6005	167480539-167687608	Zm00001d030920_T003(167480539:167521571);MSTRG.6005.2(167480539:167521653);Zm00001d030920_T001(167480539:167484068);Zm00001d030920_T002(167480539:167515427);MSTRG.6005.5(167480642:167521633);MSTRG.6005.6(167480666:167521570);MSTRG.6005.7(167480666:167484068);MSTRG.6005.8(167480693:167679199);MSTRG.6005.9(167480700:167521558);MSTRG.6005.10(167480701:167521570);MSTRG.6005.11(167480708:167489951);MS…
1	167679152	167679158	+	167679158	intergenic	MSTRG.6005	167480539-167687608	Zm00001d030920_T003(167480539:167521571);MSTRG.6005.2(167480539:167521653);Zm00001d030920_T001(167480539:167484068);Zm00001d030920_T002(167480539:167515427);MSTRG.6005.5(167480642:167521633);MSTRG.6005.6(167480666:167521570);MSTRG.6005.7(167480666:167484068);MSTRG.6005.8(167480693:167679199);MSTRG.6005.9(167480700:167521558);MSTRG.6005.10(167480701:167521570);MSTRG.6005.11(167480708:167489951);MS…
1	167679188	167679188	+	167679188	intergenic	MSTRG.6005	167480539-167687608	Zm00001d030920_T003(167480539:167521571);MSTRG.6005.2(167480539:167521653);Zm00001d030920_T001(167480539:167484068);Zm00001d030920_T002(167480539:167515427);MSTRG.6005.5(167480642:167521633);MSTRG.6005.6(167480666:167521570);MSTRG.6005.7(167480666:167484068);MSTRG.6005.8(167480693:167679199);MSTRG.6005.9(167480700:167521558);MSTRG.6005.10(167480701:167521570);MSTRG.6005.11(167480708:167489951);MS…
1	167679233	167679233	+	167679233	intergenic	MSTRG.6005	167480539-167687608	Zm00001d030920_T003(167480539:167521571);MSTRG.6005.2(167480539:167521653);Zm00001d030920_T001(167480539:167484068);Zm00001d030920_T002(167480539:167515427);MSTRG.6005.5(167480642:167521633);MSTRG.6005.6(167480666:167521570);MSTRG.6005.7(167480666:167484068);MSTRG.6005.8(167480693:167679199);MSTRG.6005.9(167480700:167521558);MSTRG.6005.10(167480701:167521570);MSTRG.6005.11(167480708:167489951);MS…
1	169191898	169191907	+	169191898	intergenic	MSTRG.6056	169188946-169191996	MSTRG.6056.1(169188946:169191996);MSTRG.6056.2(169188946:169191996)
1	169291801	169291801	+	169291801	intergenic	MSTRG.6062	169288971-169292090	MSTRG.6062.1(169288971:169292090)
1	169291848	169291894	+	169291877	intergenic	MSTRG.6062	169288971-169292090	MSTRG.6062.1(169288971:169292090)
1	169291928	169291932	+	169291932	intergenic	MSTRG.6062	169288971-169292090	MSTRG.6062.1(169288971:169292090)
1	169292010	169292010	+	169292010	intergenic	MSTRG.6062	169288971-169292090	MSTRG.6062.1(169288971:169292090)
1	170234360	170234435	+	170234422	intergenic	MSTRG.6084	170232831-170234422	MSTRG.6084.1(170232831:170234422)
1	171232379	171232379	+	171232379	intergenic	MSTRG.6095	171230361-171232593	MSTRG.6095.1(171230361:171232593)
1	171232408	171232408	+	171232408	intergenic	MSTRG.6095	171230361-171232593	MSTRG.6095.1(171230361:171232593)
1	171232492	171232544	+	171232516	intergenic	MSTRG.6095	171230361-171232593	MSTRG.6095.1(171230361:171232593)
1	172415699	172415740	+	172415707	intergenic	MSTRG.6121	172413967-172415862	MSTRG.6121.1(172413967:172415839);MSTRG.6121.2(172413967:172415862);MSTRG.6121.3(172413967:172415769);MSTRG.6121.4(172413967:172415828);Zm00001d030993_T001(172413967:172415265);MSTRG.6121.6(172414004:172415746);MSTRG.6121.7(172414015:172415761);MSTRG.6121.8(172414046:172415687);MSTRG.6121.9(172414055:172415760)
1	174578417	174578417	+	174578417	intergenic	MSTRG.6183	174573066-174584813	MSTRG.6183.1(174573066:174584813);MSTRG.6183.2(174573099:174577379)
1	175609531	175609531	+	175609531	intergenic	MSTRG.6222	175602323-175631308	Zm00001d031065_T001(175602323:175609344);MSTRG.6222.2(175604822:175631308);Zm00001d031065_T002(175604822:175609344);MSTRG.6222.4(175604846:175614370);MSTRG.6222.5(175604854:175614426);MSTRG.6222.6(175604929:175631273);Zm00001d031065_T003(175607216:175609344)
1	175631163	175631295	+	175631294	intergenic	MSTRG.6222	175602323-175631308	Zm00001d031065_T001(175602323:175609344);MSTRG.6222.2(175604822:175631308);Zm00001d031065_T002(175604822:175609344);MSTRG.6222.4(175604846:175614370);MSTRG.6222.5(175604854:175614426);MSTRG.6222.6(175604929:175631273);Zm00001d031065_T003(175607216:175609344)
1	180447321	180447321	+	180447321	intergenic	MSTRG.6348	180358215-180498421	MSTRG.6348.1(180358215:180448113);MSTRG.6348.2(180363616:180459329);MSTRG.6348.3(180363616:180492865);MSTRG.6348.4(180363616:180448113);MSTRG.6348.5(180363616:180466759);MSTRG.6348.6(180363616:180448124);MSTRG.6348.7(180363616:180448124);MSTRG.6348.8(180434879:180448120);MSTRG.6348.9(180434879:180448113);MSTRG.6348.10(180447184:180498421);MSTRG.6348.11(180447261:180448109);MSTRG.6348.12(180447277…
1	180452152	180452152	+	180452152	intergenic	MSTRG.6348	180358215-180498421	MSTRG.6348.1(180358215:180448113);MSTRG.6348.2(180363616:180459329);MSTRG.6348.3(180363616:180492865);MSTRG.6348.4(180363616:180448113);MSTRG.6348.5(180363616:180466759);MSTRG.6348.6(180363616:180448124);MSTRG.6348.7(180363616:180448124);MSTRG.6348.8(180434879:180448120);MSTRG.6348.9(180434879:180448113);MSTRG.6348.10(180447184:180498421);MSTRG.6348.11(180447261:180448109);MSTRG.6348.12(180447277…
1	182384679	182384692	+	182384692	intergenic	MSTRG.6409	182379167-182472855	MSTRG.6409.1(182379167:182472855);MSTRG.6409.2(182379167:182384439);Zm00001d031212_T002(182379167:182384473);Zm00001d031212_T001(182379167:182384439);Zm00001d031212_T003(182379212:182384439);Zm00001d031212_T004(182379266:182384440)
1	182384771	182384771	+	182384771	intergenic	MSTRG.6409	182379167-182472855	MSTRG.6409.1(182379167:182472855);MSTRG.6409.2(182379167:182384439);Zm00001d031212_T002(182379167:182384473);Zm00001d031212_T001(182379167:182384439);Zm00001d031212_T003(182379212:182384439);Zm00001d031212_T004(182379266:182384440)
1	182384804	182384804	+	182384804	intergenic	MSTRG.6409	182379167-182472855	MSTRG.6409.1(182379167:182472855);MSTRG.6409.2(182379167:182384439);Zm00001d031212_T002(182379167:182384473);Zm00001d031212_T001(182379167:182384439);Zm00001d031212_T003(182379212:182384439);Zm00001d031212_T004(182379266:182384440)
1	182384850	182384862	+	182384850	intergenic	MSTRG.6409	182379167-182472855	MSTRG.6409.1(182379167:182472855);MSTRG.6409.2(182379167:182384439);Zm00001d031212_T002(182379167:182384473);Zm00001d031212_T001(182379167:182384439);Zm00001d031212_T003(182379212:182384439);Zm00001d031212_T004(182379266:182384440)
1	182677557	182677557	+	182677557	intergenic	MSTRG.6427	182676876-182677787	MSTRG.6427.1(182676876:182677787);MSTRG.6427.2(182677161:182677734)
1	182805139	182805143	+	182805139	intergenic	MSTRG.6432	182801962-182806948	MSTRG.6432.1(182801962:182806948);MSTRG.6432.2(182801962:182805666);MSTRG.6432.3(182801962:182805459);Zm00001d031229_T001(182801962:182803223);MSTRG.6432.5(182805077:182805454)
1	182805175	182805175	+	182805175	intergenic	MSTRG.6432	182801962-182806948	MSTRG.6432.1(182801962:182806948);MSTRG.6432.2(182801962:182805666);MSTRG.6432.3(182801962:182805459);Zm00001d031229_T001(182801962:182803223);MSTRG.6432.5(182805077:182805454)
1	182805420	182805420	+	182805420	intergenic	MSTRG.6432	182801962-182806948	MSTRG.6432.1(182801962:182806948);MSTRG.6432.2(182801962:182805666);MSTRG.6432.3(182801962:182805459);Zm00001d031229_T001(182801962:182803223);MSTRG.6432.5(182805077:182805454)
1	183620338	183620363	+	183620339	intergenic	MSTRG.6466	183599008-183630240	MSTRG.6466.1(183599008:183600595);MSTRG.6466.2(183599099:183630161);MSTRG.6466.3(183599100:183630159);MSTRG.6466.4(183599101:183630240);Zm00001d031248_T001(183599535:183602698);MSTRG.6466.6(183601982:183630061)
1	183620942	183620951	+	183620947	intergenic	MSTRG.6466	183599008-183630240	MSTRG.6466.1(183599008:183600595);MSTRG.6466.2(183599099:183630161);MSTRG.6466.3(183599100:183630159);MSTRG.6466.4(183599101:183630240);Zm00001d031248_T001(183599535:183602698);MSTRG.6466.6(183601982:183630061)
1	183621010	183621010	+	183621010	intergenic	MSTRG.6466	183599008-183630240	MSTRG.6466.1(183599008:183600595);MSTRG.6466.2(183599099:183630161);MSTRG.6466.3(183599100:183630159);MSTRG.6466.4(183599101:183630240);Zm00001d031248_T001(183599535:183602698);MSTRG.6466.6(183601982:183630061)
1	183685248	183685254	+	183685254	intergenic	MSTRG.6470	183683371-183685393	MSTRG.6470.1(183683371:183685393);MSTRG.6470.2(183683444:183685300)
1	183685311	183685321	+	183685311	intergenic	MSTRG.6470	183683371-183685393	MSTRG.6470.1(183683371:183685393);MSTRG.6470.2(183683444:183685300)
1	183902138	183902138	+	183902138	intergenic	MSTRG.6474	183895158-183903041	Zm00001d031254_T002(183895158:183901422);Zm00001d031254_T001(183895158:183901422);MSTRG.6474.3(183895167:183903024);Zm00001d031254_T003(183895186:183901422);Zm00001d031254_T004(183895186:183901422);MSTRG.6474.6(183895193:183903041);MSTRG.6474.7(183895193:183903040);MSTRG.6474.8(183895199:183902981);MSTRG.6474.9(183895209:183903041);MSTRG.6474.10(183895272:183903001);MSTRG.6474.11(183895276:183902…
1	183902735	183902735	+	183902735	intergenic	MSTRG.6474	183895158-183903041	Zm00001d031254_T002(183895158:183901422);Zm00001d031254_T001(183895158:183901422);MSTRG.6474.3(183895167:183903024);Zm00001d031254_T003(183895186:183901422);Zm00001d031254_T004(183895186:183901422);MSTRG.6474.6(183895193:183903041);MSTRG.6474.7(183895193:183903040);MSTRG.6474.8(183895199:183902981);MSTRG.6474.9(183895209:183903041);MSTRG.6474.10(183895272:183903001);MSTRG.6474.11(183895276:183902…
1	183902814	183902842	+	183902814	intergenic	MSTRG.6474	183895158-183903041	Zm00001d031254_T002(183895158:183901422);Zm00001d031254_T001(183895158:183901422);MSTRG.6474.3(183895167:183903024);Zm00001d031254_T003(183895186:183901422);Zm00001d031254_T004(183895186:183901422);MSTRG.6474.6(183895193:183903041);MSTRG.6474.7(183895193:183903040);MSTRG.6474.8(183895199:183902981);MSTRG.6474.9(183895209:183903041);MSTRG.6474.10(183895272:183903001);MSTRG.6474.11(183895276:183902…
1	183902935	183902977	+	183902977	intergenic	MSTRG.6474	183895158-183903041	Zm00001d031254_T002(183895158:183901422);Zm00001d031254_T001(183895158:183901422);MSTRG.6474.3(183895167:183903024);Zm00001d031254_T003(183895186:183901422);Zm00001d031254_T004(183895186:183901422);MSTRG.6474.6(183895193:183903041);MSTRG.6474.7(183895193:183903040);MSTRG.6474.8(183895199:183902981);MSTRG.6474.9(183895209:183903041);MSTRG.6474.10(183895272:183903001);MSTRG.6474.11(183895276:183902…
1	183903025	183903039	+	183903032	intergenic	MSTRG.6474	183895158-183903041	Zm00001d031254_T002(183895158:183901422);Zm00001d031254_T001(183895158:183901422);MSTRG.6474.3(183895167:183903024);Zm00001d031254_T003(183895186:183901422);Zm00001d031254_T004(183895186:183901422);MSTRG.6474.6(183895193:183903041);MSTRG.6474.7(183895193:183903040);MSTRG.6474.8(183895199:183902981);MSTRG.6474.9(183895209:183903041);MSTRG.6474.10(183895272:183903001);MSTRG.6474.11(183895276:183902…
1	184105119	184105124	+	184105124	intergenic	MSTRG.6479	184104572-184105493	MSTRG.6479.1(184104572:184105493)
1	184105155	184105255	+	184105190	intergenic	MSTRG.6479	184104572-184105493	MSTRG.6479.1(184104572:184105493)
1	185914245	185914245	+	185914245	intergenic	MSTRG.6575	185911121-185914457	MSTRG.6575.1(185911121:185914026);MSTRG.6575.2(185911720:185914457);Zm00001d031317_T001(185911720:185913708)
1	187484353	187484359	+	187484356	intergenic	MSTRG.6636	187483568-187484454	MSTRG.6636.1(187483568:187484454)
1	187627136	187627142	+	187627142	intergenic	MSTRG.6638	187626813-187627317	MSTRG.6638.1(187626813:187627317)
1	187627175	187627175	+	187627175	intergenic	MSTRG.6638	187626813-187627317	MSTRG.6638.1(187626813:187627317)
1	189198447	189198462	+	189198447	intergenic	MSTRG.6663	189195365-189198536	MSTRG.6663.1(189195365:189198536);MSTRG.6663.2(189195365:189198522);MSTRG.6663.3(189195373:189198522);MSTRG.6663.4(189195391:189198000)
1	189198521	189198572	+	189198521	intergenic	MSTRG.6663	189195365-189198536	MSTRG.6663.1(189195365:189198536);MSTRG.6663.2(189195365:189198522);MSTRG.6663.3(189195373:189198522);MSTRG.6663.4(189195391:189198000)
1	189594164	189594169	+	189594164	intergenic	MSTRG.6683	189593205-189594341	MSTRG.6683.1(189593205:189594294);MSTRG.6683.2(189593205:189594341);Zm00001d031423_T001(189593205:189593937)
1	189594218	189594218	+	189594218	intergenic	MSTRG.6683	189593205-189594341	MSTRG.6683.1(189593205:189594294);MSTRG.6683.2(189593205:189594341);Zm00001d031423_T001(189593205:189593937)
1	189594245	189594301	+	189594245	intergenic	MSTRG.6683	189593205-189594341	MSTRG.6683.1(189593205:189594294);MSTRG.6683.2(189593205:189594341);Zm00001d031423_T001(189593205:189593937)
1	190082690	190082690	+	190082690	intergenic	MSTRG.6703	190080715-190082823	MSTRG.6703.1(190080715:190082823)
1	190277132	190277313	+	190277288	intergenic	MSTRG.6712	190205509-190277299	MSTRG.6712.1(190205509:190277299);Zm00001d031445_T001(190274859:190276757)
1	190796048	190796048	+	190796048	intergenic	MSTRG.6743;MSTRG.6745	190793372-190797877;190794969-190796097	MSTRG.6743.1(190793372:190797877);Zm00001d031455_T001(190793372:190793926);MSTRG.6745.1(190794969:190796097)
1	191332301	191332301	+	191332301	intergenic	MSTRG.6765	191327890-191332418	MSTRG.6765.1(191327890:191332418)
1	191776880	191776880	+	191776880	intergenic	MSTRG.6788	191775723-191777216	MSTRG.6788.1(191775723:191777216)
1	191777185	191777185	+	191777185	intergenic	MSTRG.6788	191775723-191777216	MSTRG.6788.1(191775723:191777216)
1	192801088	192801088	+	192801088	intergenic	MSTRG.6831	192799114-192801473	MSTRG.6831.1(192799114:192801473);Zm00001d031523_T001(192799114:192800514)
1	192801332	192801332	+	192801332	intergenic	MSTRG.6831	192799114-192801473	MSTRG.6831.1(192799114:192801473);Zm00001d031523_T001(192799114:192800514)
1	192974435	192974435	+	192974435	intergenic	MSTRG.6840	192960858-193019723	MSTRG.6840.1(192960858:192964458);MSTRG.6840.2(192960989:193019723);MSTRG.6840.3(192960996:192964403);MSTRG.6840.4(192962275:192963578);MSTRG.6840.5(192963590:192964397)
1	192974626	192974626	+	192974626	intergenic	MSTRG.6840	192960858-193019723	MSTRG.6840.1(192960858:192964458);MSTRG.6840.2(192960989:193019723);MSTRG.6840.3(192960996:192964403);MSTRG.6840.4(192962275:192963578);MSTRG.6840.5(192963590:192964397)
1	192981122	192981122	+	192981122	intergenic	MSTRG.6840;MSTRG.6843	192960858-193019723;192978018-192982047	MSTRG.6840.1(192960858:192964458);MSTRG.6840.2(192960989:193019723);MSTRG.6840.3(192960996:192964403);MSTRG.6840.4(192962275:192963578);MSTRG.6840.5(192963590:192964397);MSTRG.6843.1(192978018:192982047);MSTRG.6843.2(192978106:192980855)
1	193766544	193766544	+	193766544	intergenic	MSTRG.6864	193753195-193766663	Zm00001d031542_T001(193753195:193766058);MSTRG.6864.2(193753205:193766663);MSTRG.6864.3(193753213:193766611);MSTRG.6864.4(193753213:193766611)
1	193766573	193766573	+	193766573	intergenic	MSTRG.6864	193753195-193766663	Zm00001d031542_T001(193753195:193766058);MSTRG.6864.2(193753205:193766663);MSTRG.6864.3(193753213:193766611);MSTRG.6864.4(193753213:193766611)
1	193766604	193766625	+	193766625	intergenic	MSTRG.6864	193753195-193766663	Zm00001d031542_T001(193753195:193766058);MSTRG.6864.2(193753205:193766663);MSTRG.6864.3(193753213:193766611);MSTRG.6864.4(193753213:193766611)
1	194566585	194566599	+	194566585	intergenic	MSTRG.6905	194565668-194576150	MSTRG.6905.1(194565668:194567780);MSTRG.6905.2(194565684:194576150);MSTRG.6905.3(194565739:194566848);MSTRG.6905.4(194565779:194566848)
1	194566827	194566864	+	194566849	intergenic	MSTRG.6905	194565668-194576150	MSTRG.6905.1(194565668:194567780);MSTRG.6905.2(194565684:194576150);MSTRG.6905.3(194565739:194566848);MSTRG.6905.4(194565779:194566848)
1	194568382	194568382	+	194568382	intergenic	MSTRG.6905	194565668-194576150	MSTRG.6905.1(194565668:194567780);MSTRG.6905.2(194565684:194576150);MSTRG.6905.3(194565739:194566848);MSTRG.6905.4(194565779:194566848)
1	197179666	197179682	+	197179680	intergenic	MSTRG.7013	197158712-197179752	MSTRG.7013.1(197158712:197179752)
1	198834491	198834504	+	198834504	intergenic	MSTRG.7097	198833411-198838476	MSTRG.7097.1(198833411:198838413);MSTRG.7097.2(198833932:198838383);MSTRG.7097.3(198833935:198838330);MSTRG.7097.4(198833942:198838313);MSTRG.7097.5(198833997:198838476);MSTRG.7097.6(198835858:198838112)
1	198834585	198834585	+	198834585	intergenic	MSTRG.7097	198833411-198838476	MSTRG.7097.1(198833411:198838413);MSTRG.7097.2(198833932:198838383);MSTRG.7097.3(198833935:198838330);MSTRG.7097.4(198833942:198838313);MSTRG.7097.5(198833997:198838476);MSTRG.7097.6(198835858:198838112)
1	198835577	198835577	+	198835577	intergenic	MSTRG.7097	198833411-198838476	MSTRG.7097.1(198833411:198838413);MSTRG.7097.2(198833932:198838383);MSTRG.7097.3(198833935:198838330);MSTRG.7097.4(198833942:198838313);MSTRG.7097.5(198833997:198838476);MSTRG.7097.6(198835858:198838112)
1	198837307	198837307	+	198837307	intergenic	MSTRG.7097	198833411-198838476	MSTRG.7097.1(198833411:198838413);MSTRG.7097.2(198833932:198838383);MSTRG.7097.3(198833935:198838330);MSTRG.7097.4(198833942:198838313);MSTRG.7097.5(198833997:198838476);MSTRG.7097.6(198835858:198838112)
1	198838351	198838373	+	198838357	intergenic	MSTRG.7097	198833411-198838476	MSTRG.7097.1(198833411:198838413);MSTRG.7097.2(198833932:198838383);MSTRG.7097.3(198833935:198838330);MSTRG.7097.4(198833942:198838313);MSTRG.7097.5(198833997:198838476);MSTRG.7097.6(198835858:198838112)
1	198838434	198838434	+	198838434	intergenic	MSTRG.7097	198833411-198838476	MSTRG.7097.1(198833411:198838413);MSTRG.7097.2(198833932:198838383);MSTRG.7097.3(198833935:198838330);MSTRG.7097.4(198833942:198838313);MSTRG.7097.5(198833997:198838476);MSTRG.7097.6(198835858:198838112)
1	200424423	200424423	+	200424423	intergenic	MSTRG.7162	200422094-200426114	MSTRG.7162.1(200422094:200426114);Zm00001d031741_T001(200422094:200422981)
1	200424493	200424493	+	200424493	intergenic	MSTRG.7162	200422094-200426114	MSTRG.7162.1(200422094:200426114);Zm00001d031741_T001(200422094:200422981)
1	200425758	200425758	+	200425758	intergenic	MSTRG.7162	200422094-200426114	MSTRG.7162.1(200422094:200426114);Zm00001d031741_T001(200422094:200422981)
1	200425818	200425851	+	200425831	intergenic	MSTRG.7162	200422094-200426114	MSTRG.7162.1(200422094:200426114);Zm00001d031741_T001(200422094:200422981)
1	200425912	200425916	+	200425912	intergenic	MSTRG.7162	200422094-200426114	MSTRG.7162.1(200422094:200426114);Zm00001d031741_T001(200422094:200422981)
1	200425963	200425997	+	200425963	intergenic	MSTRG.7162	200422094-200426114	MSTRG.7162.1(200422094:200426114);Zm00001d031741_T001(200422094:200422981)
1	201952489	201952489	+	201952489	intergenic	MSTRG.7210	201947175-201953206	MSTRG.7210.1(201947175:201953206);MSTRG.7210.2(201947175:201952170);MSTRG.7210.3(201947175:201952170);MSTRG.7210.4(201947175:201952691);MSTRG.7210.5(201947175:201952170);MSTRG.7210.6(201947175:201952170);MSTRG.7210.7(201947175:201952170);Zm00001d031790_T001(201947175:201952170);Zm00001d031790_T002(201947361:201952222);MSTRG.7210.10(201948322:201952170);MSTRG.7210.11(201948365:201952170)
1	201952545	201952545	+	201952545	intergenic	MSTRG.7210	201947175-201953206	MSTRG.7210.1(201947175:201953206);MSTRG.7210.2(201947175:201952170);MSTRG.7210.3(201947175:201952170);MSTRG.7210.4(201947175:201952691);MSTRG.7210.5(201947175:201952170);MSTRG.7210.6(201947175:201952170);MSTRG.7210.7(201947175:201952170);Zm00001d031790_T001(201947175:201952170);Zm00001d031790_T002(201947361:201952222);MSTRG.7210.10(201948322:201952170);MSTRG.7210.11(201948365:201952170)
1	204751436	204751436	+	204751436	intergenic	MSTRG.7337	204749198-204754222	MSTRG.7337.1(204749198:204754222)
1	204751502	204751502	+	204751502	intergenic	MSTRG.7337	204749198-204754222	MSTRG.7337.1(204749198:204754222)
1	206650036	206650036	+	206650036	intergenic	MSTRG.7393;MSTRG.7394	206640414-206667085;206649371-206650183	MSTRG.7393.1(206640414:206642566);MSTRG.7393.2(206640500:206667085);MSTRG.7394.1(206649371:206650183)
1	207441506	207441506	+	207441506	intergenic	MSTRG.7420	207438528-207441592	MSTRG.7420.1(207438528:207441500);Zm00001d031937_T002(207438528:207441291);Zm00001d031937_T001(207438528:207441291);MSTRG.7420.4(207438588:207441592)
1	207955267	207955267	+	207955267	intergenic	MSTRG.7456	207955194-207958733	MSTRG.7456.1(207955194:207958733)
1	208385522	208385528	+	208385526	intergenic	MSTRG.7482	208357521-208403830	MSTRG.7482.1(208357521:208403830)
1	208401629	208401629	+	208401629	intergenic	MSTRG.7482	208357521-208403830	MSTRG.7482.1(208357521:208403830)
1	209143988	209143988	+	209143988	intergenic	MSTRG.7513;MSTRG.7514	209131331-209158495;209143051-209167709	MSTRG.7513.1(209131331:209156550);MSTRG.7513.2(209138535:209158495);MSTRG.7513.3(209138970:209156562);MSTRG.7513.4(209139105:209156485);MSTRG.7514.1(209143051:209167709);Zm00001d032000_T001(209166877:209167593)
1	209156499	209156499	+	209156499	intergenic	MSTRG.7513;MSTRG.7514	209131331-209158495;209143051-209167709	MSTRG.7513.1(209131331:209156550);MSTRG.7513.2(209138535:209158495);MSTRG.7513.3(209138970:209156562);MSTRG.7513.4(209139105:209156485);MSTRG.7514.1(209143051:209167709);Zm00001d032000_T001(209166877:209167593)
1	209165856	209165856	+	209165856	intergenic	MSTRG.7514;MSTRG.7516;MSTRG.7517	209143051-209167709;209159055-209168680;209164731-209165999	MSTRG.7514.1(209143051:209167709);Zm00001d032000_T001(209166877:209167593);MSTRG.7516.1(209159055:209168680);MSTRG.7517.1(209164731:209165999)
1	209399754	209399754	+	209399754	intergenic	MSTRG.7529	209398759-209399835	MSTRG.7529.1(209398759:209399835);MSTRG.7529.2(209398786:209399810)
1	209998475	209998475	+	209998475	intergenic	MSTRG.7556	209992350-209998767	Zm00001d032032_T001(209992350:209997511);Zm00001d032032_T002(209992362:209997511);MSTRG.7556.3(209992378:209998767);MSTRG.7556.4(209992378:209998749);MSTRG.7556.5(209992378:209998636);Zm00001d032032_T003(209992378:209995251);MSTRG.7556.7(209992381:209998607);MSTRG.7556.8(209992385:209998608);MSTRG.7556.9(209992415:209998553)
1	209998500	209998503	+	209998500	intergenic	MSTRG.7556	209992350-209998767	Zm00001d032032_T001(209992350:209997511);Zm00001d032032_T002(209992362:209997511);MSTRG.7556.3(209992378:209998767);MSTRG.7556.4(209992378:209998749);MSTRG.7556.5(209992378:209998636);Zm00001d032032_T003(209992378:209995251);MSTRG.7556.7(209992381:209998607);MSTRG.7556.8(209992385:209998608);MSTRG.7556.9(209992415:209998553)
1	211710910	211710910	+	211710910	intergenic	MSTRG.7609	211709635-211711141	MSTRG.7609.1(211709635:211711141)
1	212106878	212106879	+	212106878	intergenic	MSTRG.7622	212106469-212107141	MSTRG.7622.1(212106469:212107141)
1	212106922	212106940	+	212106922	intergenic	MSTRG.7622	212106469-212107141	MSTRG.7622.1(212106469:212107141)
1	212106979	212106987	+	212106987	intergenic	MSTRG.7622	212106469-212107141	MSTRG.7622.1(212106469:212107141)
1	212107045	212107045	+	212107045	intergenic	MSTRG.7622	212106469-212107141	MSTRG.7622.1(212106469:212107141)
1	213640701	213640701	+	213640701	intergenic	MSTRG.7680	213639906-213642391	MSTRG.7680.1(213639906:213642391)
1	213960228	213960228	+	213960228	intergenic	MSTRG.7692	213957721-213960640	MSTRG.7692.1(213957721:213960640);Zm00001d032130_T001(213957721:213959642)
1	216699133	216699133	+	216699133	intergenic	MSTRG.7792	216698409-216699299	MSTRG.7792.1(216698409:216699299)
1	216699158	216699208	+	216699174	intergenic	MSTRG.7792	216698409-216699299	MSTRG.7792.1(216698409:216699299)
1	216699262	216699304	+	216699290	intergenic	MSTRG.7792	216698409-216699299	MSTRG.7792.1(216698409:216699299)
1	216856632	216856632	+	216856632	intergenic	MSTRG.7799	216855137-216857170	Zm00001d032199_T001(216855137:216856299);MSTRG.7799.2(216855159:216857170)
1	216857121	216857121	+	216857121	intergenic	MSTRG.7799	216855137-216857170	Zm00001d032199_T001(216855137:216856299);MSTRG.7799.2(216855159:216857170)
1	217044349	217044349	+	217044349	intergenic	MSTRG.7806	217042837-217044753	MSTRG.7806.1(217042837:217044753)
1	217044408	217044408	+	217044408	intergenic	MSTRG.7806	217042837-217044753	MSTRG.7806.1(217042837:217044753)
1	217044703	217044703	+	217044703	intergenic	MSTRG.7806	217042837-217044753	MSTRG.7806.1(217042837:217044753)
1	217044735	217044738	+	217044738	intergenic	MSTRG.7806	217042837-217044753	MSTRG.7806.1(217042837:217044753)
1	217646811	217646811	+	217646811	intergenic	MSTRG.7822	217646722-217647145	MSTRG.7822.1(217646722:217647145)
1	218158883	218158883	+	218158883	intergenic	MSTRG.7845	218157269-218161064	MSTRG.7845.1(218157269:218161064);Zm00001d032233_T001(218157346:218158260)
1	218698986	218698986	+	218698986	intergenic	MSTRG.7859	218696442-218734632	MSTRG.7859.1(218696442:218734632);MSTRG.7859.2(218696461:218700181);MSTRG.7859.3(218696500:218699236)
1	218699025	218699089	+	218699089	intergenic	MSTRG.7859	218696442-218734632	MSTRG.7859.1(218696442:218734632);MSTRG.7859.2(218696461:218700181);MSTRG.7859.3(218696500:218699236)
1	218715025	218715025	+	218715025	intergenic	MSTRG.7859	218696442-218734632	MSTRG.7859.1(218696442:218734632);MSTRG.7859.2(218696461:218700181);MSTRG.7859.3(218696500:218699236)
1	219330294	219330294	+	219330294	intergenic	MSTRG.7877	219329997-219330448	MSTRG.7877.1(219329997:219330448)
1	219630291	219630291	+	219630291	intergenic	MSTRG.7881	219618747-219630328	MSTRG.7881.1(219618747:219630328)
1	221118960	221118960	+	221118960	intergenic	MSTRG.7937	221117896-221119353	MSTRG.7937.1(221117896:221119353)
1	222607278	222607278	+	222607278	intergenic	MSTRG.7974	222592657-222630876	Zm00001d032326_T002(222592657:222598421);Zm00001d032326_T003(222592657:222598451);Zm00001d032326_T001(222592657:222598421);Zm00001d032326_T004(222592658:222598295);MSTRG.7974.5(222592754:222598421);MSTRG.7974.6(222592754:222598421);MSTRG.7974.7(222592754:222598421);MSTRG.7974.8(222592754:222629582);MSTRG.7974.9(222592754:222605509);Zm00001d032326_T005(222592754:222597833);MSTRG.7974.11(222592756:…
1	222706029	222706029	+	222706029	intergenic	MSTRG.7983	222704129-222708100	MSTRG.7983.1(222704129:222708100)
1	223022329	223022391	+	223022365	intergenic	MSTRG.7990	222953664-223022755	MSTRG.7990.1(222953664:223022755);MSTRG.7990.2(222953664:223022394);Zm00001d032335_T001(222953664:222955145);MSTRG.7990.4(222953671:223022499);Zm00001d032336_T002(222976163:223002067);Zm00001d032336_T004(222976163:223002067);Zm00001d032336_T001(222976163:223002067);Zm00001d032336_T003(222976163:223002067);Zm00001d032336_T006(222976163:223002067);Zm00001d032336_T005(222976163:223002067);MSTRG.7990…
1	223022422	223022434	+	223022422	intergenic	MSTRG.7990	222953664-223022755	MSTRG.7990.1(222953664:223022755);MSTRG.7990.2(222953664:223022394);Zm00001d032335_T001(222953664:222955145);MSTRG.7990.4(222953671:223022499);Zm00001d032336_T002(222976163:223002067);Zm00001d032336_T004(222976163:223002067);Zm00001d032336_T001(222976163:223002067);Zm00001d032336_T003(222976163:223002067);Zm00001d032336_T006(222976163:223002067);Zm00001d032336_T005(222976163:223002067);MSTRG.7990…
1	223748680	223748788	+	223748741	intergenic	MSTRG.8020	223732522-223748833	MSTRG.8020.1(223732522:223748833);Zm00001d032357_T001(223732522:223733692);MSTRG.8020.3(223732535:223748805)
1	224722296	224722332	+	224722296	intergenic	MSTRG.8061	224721751-224722304	MSTRG.8061.1(224721751:224722304)
1	224851518	224851532	+	224851532	intergenic	MSTRG.8065	224851211-224860542	MSTRG.8065.1(224851211:224860542)
1	225507032	225507032	+	225507032	intergenic	MSTRG.8083	225506971-225507714	MSTRG.8083.1(225506971:225507714)
1	225507058	225507063	+	225507063	intergenic	MSTRG.8083	225506971-225507714	MSTRG.8083.1(225506971:225507714)
1	225514439	225514646	+	225514526	intergenic	MSTRG.8085	225510436-225514660	MSTRG.8085.1(225510436:225514660);MSTRG.8085.2(225510436:225514634);Zm00001d032400_T001(225510436:225511458);MSTRG.8085.4(225510536:225514640)
1	225926587	225926587	+	225926587	intergenic	MSTRG.8106	225916511-225987682	MSTRG.8106.1(225916511:225975989);MSTRG.8106.2(225974745:225986219);Zm00001d032422_T004(225974745:225976171);Zm00001d032423_T001(225974748:225975993);Zm00001d032423_T004(225974919:225975989);Zm00001d032423_T005(225974919:225975990);Zm00001d032423_T003(225974919:225975989);Zm00001d032423_T002(225974919:225975979);Zm00001d032423_T006(225975246:225976009);Zm00001d032424_T001(225982558:225987682)
1	226177478	226177478	+	226177478	intergenic	MSTRG.8120	226099923-226178589	MSTRG.8120.1(226099923:226103884);MSTRG.8120.2(226100159:226178589);MSTRG.8120.3(226101343:226102721)
1	226325947	226325965	+	226325947	intergenic	MSTRG.8129	226325429-226325975	MSTRG.8129.1(226325429:226325975)
1	226576937	226576937	+	226576937	intergenic	MSTRG.8139	226547250-226592362	MSTRG.8139.1(226547250:226592272);MSTRG.8139.2(226581801:226592362);Zm00001d032443_T001(226591503:226592057)
1	227160033	227160073	+	227160039	intergenic	MSTRG.8165	227155342-227160062	MSTRG.8165.1(227155342:227160062);MSTRG.8165.2(227155370:227159833);Zm00001d032453_T001(227155946:227159833);Zm00001d032453_T002(227156629:227159833);Zm00001d032453_T003(227157631:227159833)
1	227395749	227395749	+	227395749	intergenic	MSTRG.8177	227395010-227396070	MSTRG.8177.1(227395010:227396070)
1	228037861	228037861	+	228037861	intergenic	MSTRG.8204;MSTRG.8206	227994246-228075555;228036955-228038242	MSTRG.8204.1(227994246:227998126);MSTRG.8204.2(227994974:228075555);MSTRG.8206.1(228036955:228038242)
1	228038005	228038028	+	228038026	intergenic	MSTRG.8204;MSTRG.8206	227994246-228075555;228036955-228038242	MSTRG.8204.1(227994246:227998126);MSTRG.8204.2(227994974:228075555);MSTRG.8206.1(228036955:228038242)
1	228038064	228038064	+	228038064	intergenic	MSTRG.8204;MSTRG.8206	227994246-228075555;228036955-228038242	MSTRG.8204.1(227994246:227998126);MSTRG.8204.2(227994974:228075555);MSTRG.8206.1(228036955:228038242)
1	228039233	228039233	+	228039233	intergenic	MSTRG.8204	227994246-228075555	MSTRG.8204.1(227994246:227998126);MSTRG.8204.2(227994974:228075555)
1	228386692	228386696	+	228386692	intergenic	MSTRG.8216	228324960-228418699	MSTRG.8216.1(228324960:228418699)
1	228788764	228788782	+	228788764	intergenic	MSTRG.8245	228787815-228788908	MSTRG.8245.1(228787815:228788908)
1	228788812	228788812	+	228788812	intergenic	MSTRG.8245	228787815-228788908	MSTRG.8245.1(228787815:228788908)
1	228788837	228788837	+	228788837	intergenic	MSTRG.8245	228787815-228788908	MSTRG.8245.1(228787815:228788908)
1	228788862	228788881	+	228788862	intergenic	MSTRG.8245	228787815-228788908	MSTRG.8245.1(228787815:228788908)
1	229814871	229814871	+	229814871	intergenic	MSTRG.8289	229814215-229815161	MSTRG.8289.1(229814215:229815075);MSTRG.8289.2(229814250:229815161)
1	229814972	229815035	+	229815030	intergenic	MSTRG.8289	229814215-229815161	MSTRG.8289.1(229814215:229815075);MSTRG.8289.2(229814250:229815161)
1	229815061	229815061	+	229815061	intergenic	MSTRG.8289	229814215-229815161	MSTRG.8289.1(229814215:229815075);MSTRG.8289.2(229814250:229815161)
1	229865697	229865697	+	229865697	intergenic	MSTRG.8299	229864869-229868142	MSTRG.8299.1(229864869:229867726);MSTRG.8299.2(229864944:229868142);MSTRG.8299.3(229866513:229868142)
1	230244526	230244528	+	230244527	intergenic	MSTRG.8315;MSTRG.8318	230202990-230441797;230207872-230446770	Zm00001d032548_T001(230202990:230203968);MSTRG.8315.2(230203074:230441797);Zm00001d032556_T001(230440139:230441090);MSTRG.8318.1(230207872:230211225);MSTRG.8318.2(230208095:230445473);MSTRG.8318.3(230443328:230446770)
1	230382416	230382416	+	230382416	intergenic	MSTRG.8315;MSTRG.8318;MSTRG.8324	230202990-230441797;230207872-230446770;230381635-230382765	Zm00001d032548_T001(230202990:230203968);MSTRG.8315.2(230203074:230441797);Zm00001d032556_T001(230440139:230441090);MSTRG.8318.1(230207872:230211225);MSTRG.8318.2(230208095:230445473);MSTRG.8318.3(230443328:230446770);MSTRG.8324.1(230381635:230382765)
1	230441789	230441789	+	230441789	intergenic	MSTRG.8315;MSTRG.8318	230202990-230441797;230207872-230446770	Zm00001d032548_T001(230202990:230203968);MSTRG.8315.2(230203074:230441797);Zm00001d032556_T001(230440139:230441090);MSTRG.8318.1(230207872:230211225);MSTRG.8318.2(230208095:230445473);MSTRG.8318.3(230443328:230446770)
1	230666638	230666652	+	230666652	intergenic	MSTRG.8341	230666421-230667154	MSTRG.8341.1(230666421:230667154)
1	230666782	230666782	+	230666782	intergenic	MSTRG.8341	230666421-230667154	MSTRG.8341.1(230666421:230667154)
1	231865240	231865240	+	231865240	intergenic	MSTRG.8399	231856463-231867995	MSTRG.8399.1(231856463:231867995);MSTRG.8399.2(231856483:231867967);MSTRG.8399.3(231857160:231867989);MSTRG.8399.4(231862901:231867971)
1	232014170	232014170	+	232014170	intergenic	MSTRG.8405	232008451-232014290	MSTRG.8405.1(232008451:232013983);MSTRG.8405.2(232008538:232014290);Zm00001d032609_T001(232008769:232010659);Zm00001d032609_T003(232008769:232013983);Zm00001d032609_T002(232008769:232013983);Zm00001d032609_T004(232010470:232013983);Zm00001d032609_T005(232011730:232013983)
1	232483733	232483733	+	232483733	intergenic	MSTRG.8425	232483168-232486876	MSTRG.8425.1(232483168:232486876);MSTRG.8425.2(232483189:232486865);MSTRG.8425.3(232483215:232486851);MSTRG.8425.4(232483224:232486873);MSTRG.8425.5(232483230:232486842);MSTRG.8425.6(232483244:232486842);MSTRG.8425.7(232483265:232486842);Zm00001d022937_T001(232484987:232486842)
1	232525800	232525821	+	232525800	intergenic	MSTRG.8428	232524946-232526629	MSTRG.8428.1(232524946:232526629)
1	232567120	232567126	+	232567126	intergenic	MSTRG.8430	232559757-232567340	MSTRG.8430.1(232559757:232567340);Zm00001d032632_T001(232559757:232566722);Zm00001d032632_T002(232559757:232566733);Zm00001d032632_T003(232559757:232566736);Zm00001d032632_T004(232559868:232566727);MSTRG.8430.6(232560109:232567028);Zm00001d032632_T005(232560109:232566733);Zm00001d032632_T006(232561095:232566720);Zm00001d032632_T007(232561462:232566729);Zm00001d032632_T008(232564876:232566732)
1	232567152	232567157	+	232567152	intergenic	MSTRG.8430	232559757-232567340	MSTRG.8430.1(232559757:232567340);Zm00001d032632_T001(232559757:232566722);Zm00001d032632_T002(232559757:232566733);Zm00001d032632_T003(232559757:232566736);Zm00001d032632_T004(232559868:232566727);MSTRG.8430.6(232560109:232567028);Zm00001d032632_T005(232560109:232566733);Zm00001d032632_T006(232561095:232566720);Zm00001d032632_T007(232561462:232566729);Zm00001d032632_T008(232564876:232566732)
1	234643831	234643874	+	234643834	intergenic	MSTRG.8517	234643274-234644214	MSTRG.8517.1(234643274:234644214)
1	234750548	234750609	+	234750576	intergenic	MSTRG.8522	234750048-234750687	MSTRG.8522.1(234750048:234750687)
1	234750652	234750652	+	234750652	intergenic	MSTRG.8522	234750048-234750687	MSTRG.8522.1(234750048:234750687)
1	236162460	236162460	+	236162460	intergenic	MSTRG.8574	236161923-236162865	MSTRG.8574.1(236161923:236162865)
1	236162500	236162509	+	236162500	intergenic	MSTRG.8574	236161923-236162865	MSTRG.8574.1(236161923:236162865)
1	236901503	236901503	+	236901503	intergenic	MSTRG.8597	236899313-236903015	MSTRG.8597.1(236899313:236903015)
1	237517117	237517117	+	237517117	intergenic	MSTRG.8623	237516435-237518248	MSTRG.8623.1(237516435:237518248)
1	237573044	237573044	+	237573044	intergenic	MSTRG.8625	237573011-237573700	MSTRG.8625.1(237573011:237573700)
1	237748097	237748097	+	237748097	intergenic	MSTRG.8636	237747500-237748265	MSTRG.8636.1(237747500:237748265)
1	238161483	238161483	+	238161483	intergenic	MSTRG.8659	238155145-238162637	MSTRG.8659.1(238155145:238162637)
1	238805038	238805038	+	238805038	intergenic	MSTRG.8681	238804933-238806853	MSTRG.8681.1(238804933:238806853)
1	239123915	239123915	+	239123915	intergenic	MSTRG.8695	239121853-239127357	MSTRG.8695.1(239121853:239127357)
1	239178605	239178805	+	239178671	intergenic	MSTRG.8702	239167732-239184690	MSTRG.8702.1(239167732:239184690)
1	239178953	239178958	+	239178953	intergenic	MSTRG.8702	239167732-239184690	MSTRG.8702.1(239167732:239184690)
1	239179055	239179055	+	239179055	intergenic	MSTRG.8702	239167732-239184690	MSTRG.8702.1(239167732:239184690)
1	241821929	241821929	+	241821929	intergenic	MSTRG.8796	241821337-241822275	MSTRG.8796.1(241821337:241822275)
1	241822001	241822009	+	241822001	intergenic	MSTRG.8796	241821337-241822275	MSTRG.8796.1(241821337:241822275)
1	245429360	245429360	+	245429360	intergenic	MSTRG.8926	245419957-245453424	MSTRG.8926.1(245419957:245453424);MSTRG.8926.2(245419996:245453294);MSTRG.8926.3(245420112:245453325);MSTRG.8926.4(245420130:245453338);Zm00001d032978_T001(245437954:245453257);Zm00001d022948_T001(245439177:245439414);MSTRG.8926.7(245442321:245453321)
1	245737329	245737329	+	245737329	intergenic	MSTRG.8936	245736283-245739910	MSTRG.8936.1(245736283:245739910);MSTRG.8936.2(245736671:245739440)
1	246988027	246988027	+	246988027	intergenic	MSTRG.8978	246987744-246990338	MSTRG.8978.1(246987744:246990338);MSTRG.8978.2(246987768:246989769);MSTRG.8978.3(246987796:246989769);MSTRG.8978.4(246988269:246990237);Zm00001d033012_T001(246988429:246989769)
1	246990288	246990288	+	246990288	intergenic	MSTRG.8978	246987744-246990338	MSTRG.8978.1(246987744:246990338);MSTRG.8978.2(246987768:246989769);MSTRG.8978.3(246987796:246989769);MSTRG.8978.4(246988269:246990237);Zm00001d033012_T001(246988429:246989769)
1	246993747	246993747	+	246993747	intergenic	MSTRG.8981	246992931-246993947	MSTRG.8981.1(246992931:246993947)
1	246993782	246993782	+	246993782	intergenic	MSTRG.8981	246992931-246993947	MSTRG.8981.1(246992931:246993947)
1	246993830	246993830	+	246993830	intergenic	MSTRG.8981	246992931-246993947	MSTRG.8981.1(246992931:246993947)
1	246993930	246993954	+	246993930	intergenic	MSTRG.8981	246992931-246993947	MSTRG.8981.1(246992931:246993947)
1	248291481	248291481	+	248291481	intergenic	MSTRG.9025	248291005-248291489	MSTRG.9025.1(248291005:248291489)
1	249901671	249901723	+	249901675	intergenic	MSTRG.9086	249897241-249902094	MSTRG.9086.1(249897241:249902094);MSTRG.9086.2(249897243:249902080);MSTRG.9086.3(249897363:249902057);Zm00001d033084_T001(249897363:249899939);Zm00001d033084_T002(249897363:249899939)
1	249901870	249901895	+	249901895	intergenic	MSTRG.9086	249897241-249902094	MSTRG.9086.1(249897241:249902094);MSTRG.9086.2(249897243:249902080);MSTRG.9086.3(249897363:249902057);Zm00001d033084_T001(249897363:249899939);Zm00001d033084_T002(249897363:249899939)
1	249901933	249902042	+	249902030	intergenic	MSTRG.9086	249897241-249902094	MSTRG.9086.1(249897241:249902094);MSTRG.9086.2(249897243:249902080);MSTRG.9086.3(249897363:249902057);Zm00001d033084_T001(249897363:249899939);Zm00001d033084_T002(249897363:249899939)
1	249902078	249902078	+	249902078	intergenic	MSTRG.9086	249897241-249902094	MSTRG.9086.1(249897241:249902094);MSTRG.9086.2(249897243:249902080);MSTRG.9086.3(249897363:249902057);Zm00001d033084_T001(249897363:249899939);Zm00001d033084_T002(249897363:249899939)
1	250344482	250344482	+	250344482	intergenic	MSTRG.9121	250339487-250360412	MSTRG.9121.1(250339487:250360343);MSTRG.9121.2(250339652:250346790);Zm00001d033109_T004(250346963:250360412);Zm00001d033109_T001(250346963:250360343);Zm00001d033109_T002(250346963:250360412);Zm00001d033109_T003(250346963:250360412);MSTRG.9121.7(250346969:250360343);Zm00001d033109_T006(250346969:250360343);Zm00001d033109_T005(250346969:250351521);Zm00001d033109_T007(250346969:250360348);MSTRG.9121…
1	251438664	251438669	+	251438664	intergenic	MSTRG.9139	251438006-251438956	MSTRG.9139.1(251438006:251438956)
1	251438925	251438925	+	251438925	intergenic	MSTRG.9139	251438006-251438956	MSTRG.9139.1(251438006:251438956)
1	251443261	251443261	+	251443261	intergenic	MSTRG.9141	251442493-251467545	MSTRG.9141.1(251442493:251467545);MSTRG.9141.2(251442554:251467523);MSTRG.9141.3(251442639:251446596);MSTRG.9141.4(251442668:251443203);MSTRG.9141.5(251442668:251467323);MSTRG.9141.6(251442729:251446764);MSTRG.9141.7(251465684:251467405)
1	251446677	251446677	+	251446677	intergenic	MSTRG.9141	251442493-251467545	MSTRG.9141.1(251442493:251467545);MSTRG.9141.2(251442554:251467523);MSTRG.9141.3(251442639:251446596);MSTRG.9141.4(251442668:251443203);MSTRG.9141.5(251442668:251467323);MSTRG.9141.6(251442729:251446764);MSTRG.9141.7(251465684:251467405)
1	252919554	252919554	+	252919554	intergenic	MSTRG.9205	252914205-252951839	MSTRG.9205.1(252914205:252951781);Zm00001d033175_T001(252914205:252919395);Zm00001d033175_T002(252914205:252919395);MSTRG.9205.4(252914639:252951792);MSTRG.9205.5(252914675:252951736);MSTRG.9205.6(252914679:252951768);MSTRG.9205.7(252914693:252951769);MSTRG.9205.8(252914760:252951807);MSTRG.9205.9(252920498:252951837);MSTRG.9205.10(252920584:252951763);MSTRG.9205.11(252920592:252951769);MSTRG.920…
1	252951749	252951749	+	252951749	intergenic	MSTRG.9205	252914205-252951839	MSTRG.9205.1(252914205:252951781);Zm00001d033175_T001(252914205:252919395);Zm00001d033175_T002(252914205:252919395);MSTRG.9205.4(252914639:252951792);MSTRG.9205.5(252914675:252951736);MSTRG.9205.6(252914679:252951768);MSTRG.9205.7(252914693:252951769);MSTRG.9205.8(252914760:252951807);MSTRG.9205.9(252920498:252951837);MSTRG.9205.10(252920584:252951763);MSTRG.9205.11(252920592:252951769);MSTRG.920…
1	252951781	252951809	+	252951794	intergenic	MSTRG.9205	252914205-252951839	MSTRG.9205.1(252914205:252951781);Zm00001d033175_T001(252914205:252919395);Zm00001d033175_T002(252914205:252919395);MSTRG.9205.4(252914639:252951792);MSTRG.9205.5(252914675:252951736);MSTRG.9205.6(252914679:252951768);MSTRG.9205.7(252914693:252951769);MSTRG.9205.8(252914760:252951807);MSTRG.9205.9(252920498:252951837);MSTRG.9205.10(252920584:252951763);MSTRG.9205.11(252920592:252951769);MSTRG.920…
1	252953330	252953373	+	252953343	intergenic	MSTRG.9208	252953003-252953651	MSTRG.9208.1(252953003:252953651)
1	252953402	252953405	+	252953402	intergenic	MSTRG.9208	252953003-252953651	MSTRG.9208.1(252953003:252953651)
1	252953433	252953433	+	252953433	intergenic	MSTRG.9208	252953003-252953651	MSTRG.9208.1(252953003:252953651)
1	252953461	252953461	+	252953461	intergenic	MSTRG.9208	252953003-252953651	MSTRG.9208.1(252953003:252953651)
1	254396334	254396334	+	254396334	intergenic	MSTRG.9249	254393717-254396588	MSTRG.9249.1(254393717:254396588);MSTRG.9249.2(254393723:254396502);MSTRG.9249.3(254393723:254395362);Zm00001d033213_T001(254394280:254395362)
1	254430190	254430194	+	254430190	intergenic	MSTRG.9256	254429219-254430275	MSTRG.9256.1(254429219:254430275)
1	255210960	255210960	+	255210960	intergenic	MSTRG.9277	255210534-255211034	MSTRG.9277.1(255210534:255211034)
1	256995195	256995197	+	256995196	intergenic	MSTRG.9338	256940922-257005986	MSTRG.9338.1(256940922:257005834);Zm00001d033272_T001(256999749:257005837);Zm00001d033272_T003(256999749:257005986);Zm00001d033272_T005(256999749:257005986);Zm00001d033272_T004(256999749:257005986);Zm00001d033272_T002(256999749:257005986);Zm00001d033272_T006(256999767:257005839);Zm00001d033272_T007(256999773:257005776);Zm00001d033272_T008(256999774:257005831);MSTRG.9338.10(256999817:257005836);MS…
1	257772505	257772505	+	257772505	intergenic	MSTRG.9372	257767795-257772599	MSTRG.9372.1(257767795:257772599)
1	258338154	258338154	+	258338154	intergenic	MSTRG.9401	258331851-258338369	MSTRG.9401.1(258331851:258338369);Zm00001d033307_T001(258331851:258336431);MSTRG.9401.3(258331854:258338352);MSTRG.9401.4(258331854:258338356);MSTRG.9401.5(258331854:258338340);MSTRG.9401.6(258331854:258336431);MSTRG.9401.7(258331854:258338343);Zm00001d033307_T002(258331854:258335126);MSTRG.9401.9(258331879:258336431);MSTRG.9401.10(258331879:258338313);MSTRG.9401.11(258331879:258338315);MSTRG.940…
1	258662413	258662413	+	258662413	intergenic	MSTRG.9407	258658935-258662794	Zm00001d033312_T001(258658935:258662151);Zm00001d033312_T002(258658960:258662147);Zm00001d033312_T003(258658962:258661980);Zm00001d033312_T004(258658964:258662144);MSTRG.9407.5(258658972:258662144);MSTRG.9407.6(258658972:258662144);Zm00001d033312_T005(258658974:258662071);Zm00001d033312_T006(258658977:258662147);MSTRG.9407.9(258658979:258662144);MSTRG.9407.10(258658979:258662144);MSTRG.9407.11(25…
1	260858157	260858157	+	260858157	intergenic	MSTRG.9506	260837492-260858239	Zm00001d033370_T001(260837492:260857730);Zm00001d033370_T002(260837500:260857170);MSTRG.9506.3(260837517:260858239);Zm00001d033370_T003(260837517:260856860);Zm00001d033370_T004(260837517:260857651);Zm00001d033370_T005(260837666:260857659);Zm00001d033370_T006(260837706:260857730);Zm00001d033370_T007(260838704:260857138)
1	260858191	260858191	+	260858191	intergenic	MSTRG.9506	260837492-260858239	Zm00001d033370_T001(260837492:260857730);Zm00001d033370_T002(260837500:260857170);MSTRG.9506.3(260837517:260858239);Zm00001d033370_T003(260837517:260856860);Zm00001d033370_T004(260837517:260857651);Zm00001d033370_T005(260837666:260857659);Zm00001d033370_T006(260837706:260857730);Zm00001d033370_T007(260838704:260857138)
1	260933302	260933302	+	260933302	intergenic	MSTRG.9512	260932369-260971566	MSTRG.9512.1(260932369:260971566);MSTRG.9512.2(260932377:260971563);MSTRG.9512.3(260932459:260971563);MSTRG.9512.4(260932555:260971563);Zm00001d033374_T001(260971128:260971563)
1	261463709	261463709	+	261463709	intergenic	MSTRG.9538	261463400-261463811	MSTRG.9538.1(261463400:261463811)
1	261788596	261788596	+	261788596	intergenic	MSTRG.9551	261787583-261794264	MSTRG.9551.1(261787583:261794264);MSTRG.9551.2(261790427:261793086);ENSRNA049470793-T1(261790427:261790518);MSTRG.9551.4(261791457:261793253);MSTRG.9551.5(261792659:261793151)
1	261789188	261789188	+	261789188	intergenic	MSTRG.9551	261787583-261794264	MSTRG.9551.1(261787583:261794264);MSTRG.9551.2(261790427:261793086);ENSRNA049470793-T1(261790427:261790518);MSTRG.9551.4(261791457:261793253);MSTRG.9551.5(261792659:261793151)
1	261793268	261793268	+	261793268	intergenic	MSTRG.9551	261787583-261794264	MSTRG.9551.1(261787583:261794264);MSTRG.9551.2(261790427:261793086);ENSRNA049470793-T1(261790427:261790518);MSTRG.9551.4(261791457:261793253);MSTRG.9551.5(261792659:261793151)
1	261793487	261793487	+	261793487	intergenic	MSTRG.9551	261787583-261794264	MSTRG.9551.1(261787583:261794264);MSTRG.9551.2(261790427:261793086);ENSRNA049470793-T1(261790427:261790518);MSTRG.9551.4(261791457:261793253);MSTRG.9551.5(261792659:261793151)
1	261793528	261793528	+	261793528	intergenic	MSTRG.9551	261787583-261794264	MSTRG.9551.1(261787583:261794264);MSTRG.9551.2(261790427:261793086);ENSRNA049470793-T1(261790427:261790518);MSTRG.9551.4(261791457:261793253);MSTRG.9551.5(261792659:261793151)
1	261794111	261794111	+	261794111	intergenic	MSTRG.9551	261787583-261794264	MSTRG.9551.1(261787583:261794264);MSTRG.9551.2(261790427:261793086);ENSRNA049470793-T1(261790427:261790518);MSTRG.9551.4(261791457:261793253);MSTRG.9551.5(261792659:261793151)
1	261794183	261794222	+	261794195	intergenic	MSTRG.9551	261787583-261794264	MSTRG.9551.1(261787583:261794264);MSTRG.9551.2(261790427:261793086);ENSRNA049470793-T1(261790427:261790518);MSTRG.9551.4(261791457:261793253);MSTRG.9551.5(261792659:261793151)
1	262550450	262550464	+	262550450	intergenic	MSTRG.9571	262541942-262562289	MSTRG.9571.1(262541942:262549611);Zm00001d033415_T001(262541942:262544776);MSTRG.9571.3(262541963:262552455);MSTRG.9571.4(262541986:262552452);MSTRG.9571.5(262542011:262552474);MSTRG.9571.6(262542050:262558295);Zm00001d033416_T001(262543085:262544182);MSTRG.9571.8(262552552:262559951);MSTRG.9571.9(262552565:262561691);MSTRG.9571.10(262552565:262561691);MSTRG.9571.11(262552567:262561683);MSTRG.957…
1	262550494	262550494	+	262550494	intergenic	MSTRG.9571	262541942-262562289	MSTRG.9571.1(262541942:262549611);Zm00001d033415_T001(262541942:262544776);MSTRG.9571.3(262541963:262552455);MSTRG.9571.4(262541986:262552452);MSTRG.9571.5(262542011:262552474);MSTRG.9571.6(262542050:262558295);Zm00001d033416_T001(262543085:262544182);MSTRG.9571.8(262552552:262559951);MSTRG.9571.9(262552565:262561691);MSTRG.9571.10(262552565:262561691);MSTRG.9571.11(262552567:262561683);MSTRG.957…
1	262554381	262554381	+	262554381	intergenic	MSTRG.9571	262541942-262562289	MSTRG.9571.1(262541942:262549611);Zm00001d033415_T001(262541942:262544776);MSTRG.9571.3(262541963:262552455);MSTRG.9571.4(262541986:262552452);MSTRG.9571.5(262542011:262552474);MSTRG.9571.6(262542050:262558295);Zm00001d033416_T001(262543085:262544182);MSTRG.9571.8(262552552:262559951);MSTRG.9571.9(262552565:262561691);MSTRG.9571.10(262552565:262561691);MSTRG.9571.11(262552567:262561683);MSTRG.957…
1	262555473	262555473	+	262555473	intergenic	MSTRG.9571	262541942-262562289	MSTRG.9571.1(262541942:262549611);Zm00001d033415_T001(262541942:262544776);MSTRG.9571.3(262541963:262552455);MSTRG.9571.4(262541986:262552452);MSTRG.9571.5(262542011:262552474);MSTRG.9571.6(262542050:262558295);Zm00001d033416_T001(262543085:262544182);MSTRG.9571.8(262552552:262559951);MSTRG.9571.9(262552565:262561691);MSTRG.9571.10(262552565:262561691);MSTRG.9571.11(262552567:262561683);MSTRG.957…
1	262556640	262556646	+	262556646	intergenic	MSTRG.9571	262541942-262562289	MSTRG.9571.1(262541942:262549611);Zm00001d033415_T001(262541942:262544776);MSTRG.9571.3(262541963:262552455);MSTRG.9571.4(262541986:262552452);MSTRG.9571.5(262542011:262552474);MSTRG.9571.6(262542050:262558295);Zm00001d033416_T001(262543085:262544182);MSTRG.9571.8(262552552:262559951);MSTRG.9571.9(262552565:262561691);MSTRG.9571.10(262552565:262561691);MSTRG.9571.11(262552567:262561683);MSTRG.957…
[truncated: 8,165 more rows]
